# Supplementary material
Source: PubMed Central journal article supplement (PMC6658087)
Supplement: NIHMS1527856-supplement-Supplementary.pdf [file NIHMS1527856-supplement-Supplementary.pdf]

**Table E1. Nrf2+/+ Mice: Air PBS vs SFN transcripts with  $\geq$  +/- 1.45 fold change**

Moderated T-Test (p-value cut-off:0.01)/Fold Change 1.5

\*Fold change (FC) in red-increased by SFN, in blue-decreased by SFN.

| RefSeq Transcript ID              | p        | *FC (SFN vs | Gene Symbol         | Gene Title                                                                  |
|-----------------------------------|----------|-------------|---------------------|-----------------------------------------------------------------------------|
| NM_008725                         | 0.001336 | 31.747      | <i>Nppa</i>         | natriuretic peptide type A                                                  |
| NM_008522                         | 0.006068 | 13.076      | <i>Ltf</i>          | lactotransferrin                                                            |
| NM_001141927///NM_023129          | 0.001845 | 10.130      | <i>Pln</i>          | phospholamban                                                               |
| NM_009605                         | 0.001909 | 8.728       | <i>Adipoq</i>       | adiponectin, C1Q and collagen domain containing                             |
| NM_001122756///NM_016869          | 0.000607 | 7.761       | <i>Corin</i>        | corin                                                                       |
| NM_027416                         | 0.004907 | 7.612       | <i>Calml3</i>       | calmodulin-like 3                                                           |
| NM_009406                         | 0.003266 | 6.943       | <i>Tnni3</i>        | troponin I, cardiac 3                                                       |
| NM_007702                         | 0.001799 | 6.877       | <i>Cidea</i>        | cell death-inducing DNA fragmentation factor, alpha subunit-like effector A |
|                                   | 0.007252 | 6.574       | <i>BB144871</i>     | expressed sequence BB144871                                                 |
| NM_013459                         | 0.001343 | 6.098       | <i>Cfd</i>          | complement factor D (adipsin)                                               |
| NM_010859                         | 0.003246 | 5.904       | <i>MyI3</i>         | myosin, light polypeptide 3                                                 |
| NM_001195006///NM_145602          | 0.001537 | 5.767       | <i>NdrG4</i>        | N-myc downstream regulated gene 4                                           |
| NM_028801                         | 0.005436 | 5.742       | <i>Muc5b</i>        | mucin 5, subtype B, tracheobronchial                                        |
| NR_045305                         | 0.007929 | 5.680       | <i>AU040972</i>     | expressed sequence AU040972                                                 |
| NM_009363                         | 0.006365 | 5.612       | <i>Tff2</i>         | trefoil factor 2 (spasmolytic protein 1)                                    |
| NM_023868                         | 0.004956 | 5.157       | <i>Ryr2</i>         | ryanodine receptor 2, cardiac                                               |
| NM_029803                         | 0.007178 | 5.069       | <i>Ifi2712a</i>     | interferon, alpha-inducible protein 27 like 2A                              |
| NM_009814                         | 0.000465 | 5.030       | <i>Casq2</i>        | calsequestrin 2                                                             |
| NM_013505                         | 0.001478 | 4.909       | <i>Dsc2</i>         | desmocollin 2                                                               |
| NM_008653                         | 0.002806 | 4.904       | <i>Mybpc3</i>       | myosin binding protein C, cardiac                                           |
| NM_024406                         | 0.000658 | 4.898       | <i>Fabp4</i>        | fatty acid binding protein 4, adipocyte                                     |
| NM_009393                         | 0.000432 | 4.846       | <i>Tnnc1</i>        | troponin C, cardiac/slow skeletal                                           |
| NM_016771                         | 0.008286 | 4.766       | <i>Sult1d1</i>      | sulfotransferase family 1D, member 1                                        |
| NM_001130174///NM_00113010        | 0.004729 | 4.664       | <i>Tnnt2</i>        | troponin T2, cardiac                                                        |
| NM_001198841///NM_013808          | 0.002152 | 4.636       | <i>Csrp3</i>        | cysteine and glycine-rich protein 3                                         |
| NM_008469                         | 0.003916 | 4.404       | <i>Krt15</i>        | keratin 15                                                                  |
| NM_001271402///NM_00127140        | 0.000002 | 4.361       | <i>Ephx2</i>        | epoxide hydrolase 2, cytoplasmic                                            |
| NM_008664                         | 0.000697 | 4.325       | <i>Myom2</i>        | myomesin 2                                                                  |
| NM_175441                         | 0.000836 | 4.245       | <i>Mylk3</i>        | myosin light chain kinase 3                                                 |
| NM_009381                         | 0.009208 | 4.107       | <i>Thrsp</i>        | thyroid hormone responsive                                                  |
| NM_007606                         | 0.003685 | 4.087       | <i>Car3</i>         | carbonic anhydrase 3                                                        |
| NM_009944                         | 0.000907 | 4.060       | <i>Cox7a1</i>       | cytochrome c oxidase subunit VIIa 1                                         |
| NM_007692///NM_009948///NM_000271 | 0.000271 | 3.977       | <i>Chkb///Cpt1b</i> | choline kinase beta///carnitine palmitoyltransferase 1b, muscle             |
| NM_021503                         | 0.000372 | 3.967       | <i>Myoz2</i>        | myozenin 2                                                                  |

| RefSeq Transcript ID      | p        | *FC (SFN vs Gene Symbol) | Gene Title                                                                      |
|---------------------------|----------|--------------------------|---------------------------------------------------------------------------------|
| NM_007664                 | 0.000663 | 3.796                    | <b>Cdh2</b><br>cadherin 2                                                       |
| NM_001003914///NM_0011715 | 0.000714 | 3.792                    | <b>Obscn</b><br>obscurin, cytoskeletal calmodulin and titin-interacting RhoGEF  |
| NM_010473                 | 0.001059 | 3.752                    | <b>Hrc</b><br>histidine rich calcium binding protein                            |
| NM_175276                 | 0.002259 | 3.732                    | <b>Fhod3</b><br>formin homology 2 domain containing 3                           |
| NM_144936                 | 0.000614 | 3.712                    | <b>Tmem45b</b><br>transmembrane protein 45b                                     |
| NM_007751                 | 0.002047 | 3.698                    | <b>Cox8b</b><br>cytochrome c oxidase subunit VIIIb                              |
| NM_001164171///NM_010856/ | 0.008996 | 3.629                    | <b>Myh6///Myh7</b><br>myosin, heavy polypeptide 6, cardiac muscle, alpha///beta |
| NM_001204959///NM_022984  | 0.003423 | 3.608                    | <b>Retn</b><br>resistin                                                         |
| NM_021282                 | 0.003714 | 3.518                    | <b>Cyp2e1</b><br>cytochrome P450, family 2, subfamily e, polypeptide 1          |
| NM_001013013              | 0.000914 | 3.508                    | <b>Dhrs7c</b><br>dehydrogenase/reductase (SDR family) member 7C                 |
| NM_011978                 | 0.007727 | 3.503                    | <b>Slc27a2</b><br>solute carrier family 27 (fatty acid transporter), member 2   |
| NM_145635                 | 0.004460 | 3.425                    | <b>Adig</b><br>adipogenin                                                       |
| NM_022020                 | 0.000080 | 3.418                    | <b>Rbp7</b><br>retinol binding protein 7, cellular                              |
| NM_175347                 | 0.006336 | 3.324                    | <b>Srl</b><br>sarcalumenin                                                      |
| NM_029844                 | 0.004513 | 3.300                    | <b>Mrap</b><br>melanocortin 2 receptor accessory protein                        |
| NM_001252591///NM_025357/ | 0.005819 | 3.278                    | <b>Smpx</b><br>small muscle protein, X-linked                                   |
| NM_011082                 | 0.007537 | 3.220                    | <b>Pigr</b><br>polymeric immunoglobulin receptor                                |
| NM_027402                 | 0.000379 | 3.124                    | <b>Fndc5</b><br>fibronectin type III domain containing 5                        |
| NM_010174                 | 0.004529 | 3.101                    | <b>Fabp3</b><br>fatty acid binding protein 3, muscle and heart                  |
| NM_007403                 | 0.007147 | 3.040                    | <b>Adam8</b><br>a disintegrin and metallopeptidase domain 8                     |
| NM_008768                 | 0.001750 | 3.026                    | <b>Orm1</b><br>orosomucoid 1                                                    |
| NM_153576                 | 0.009283 | 2.956                    | <b>Cxcl17</b><br>chemokine (C-X-C motif) ligand 17                              |
| NM_011196                 | 0.006267 | 2.954                    | <b>Ptger3</b><br>prostaglandin E receptor 3 (subtype EP3)                       |
| NM_001205219///NM_172752  | 0.006490 | 2.942                    | <b>Sorbs2</b><br>sorbin and SH3 domain containing 2                             |
| NM_013868                 | 0.001282 | 2.851                    | <b>Hspb7</b><br>heat shock protein family, member 7 (cardiovascular)            |
| NM_001077348///NM_025874  | 0.000596 | 2.801                    | <b>Plin5</b><br>perilipin 5                                                     |
| NM_001037740///NM_177204  | 0.000944 | 2.785                    | <b>Strip2</b><br>striatin interacting protein 2                                 |
| NM_009943                 | 0.004628 | 2.781                    | <b>Cox6a2</b><br>cytochrome c oxidase subunit VIa polypeptide 2                 |
| NM_029095///NR_027967     | 0.003734 | 2.738                    | <b>Hhat1</b><br>hedgehog acyltransferase-like                                   |
| NM_020568                 | 0.001259 | 2.737                    | <b>Plin4</b><br>perilipin 4                                                     |
| NM_019697                 | 0.003016 | 2.725                    | <b>Kcnd2</b><br>potassium voltage-gated channel, Shal-related family, member 2  |
| NM_023784                 | 0.009142 | 2.687                    | <b>Yipf7</b><br>Yip1 domain family, member 7                                    |
| NM_001039071///NM_0010390 | 0.003697 | 2.677                    | <b>Ldb3</b><br>LIM domain binding 3                                             |
| NM_008243                 | 0.007580 | 2.650                    | <b>Mst1</b><br>macrophage stimulating 1 (hepatocyte growth factor-like)         |
| NM_009608                 | 0.003936 | 2.637                    | <b>Actc1</b><br>actin, alpha, cardiac muscle 1                                  |
| NM_145838                 | 0.005199 | 2.623                    | <b>St8sia6</b><br>ST8 alpha-N-acetyl-neuraminide alpha-2,8-sialyltransferase 6  |
| NM_019662                 | 0.000465 | 2.617                    | <b>Rrad</b><br>Ras-related associated with diabetes                             |

| RefSeq Transcript ID      | p        | *FC (SFN vs Gene Symbol) | Gene Title                                                                           |
|---------------------------|----------|--------------------------|--------------------------------------------------------------------------------------|
| NM_001254761///NM_023270  | 0.001811 | 2.610                    | <b>Rnf128</b><br>ring finger protein 128                                             |
| NM_001253860///NM_021544  | 0.003531 | 2.586                    | <b>Scn5a</b><br>sodium channel, voltage-gated, type V, alpha                         |
| NM_138628                 | 0.009483 | 2.555                    | <b>Txlnb</b><br>taxilin beta                                                         |
| NM_001136080///NM_009161  | 0.005900 | 2.480                    | <b>Sgca</b><br>sarcoglycan, alpha (dystrophin-associated glycoprotein)               |
| NM_026384                 | 0.002076 | 2.474                    | <b>Dgat2</b><br>diacylglycerol O-acyltransferase 2                                   |
| NM_009903                 | 0.005395 | 2.453                    | <b>Cldn4</b><br>claudin 4                                                            |
| NM_145831                 | 0.008535 | 2.439                    | <b>Dmrt2</b><br>doublesex and mab-3 related transcription factor 2                   |
| NM_009700                 | 0.005835 | 2.434                    | <b>Aqp4</b><br>aquaporin 4                                                           |
| NM_001083934///NM_010867  | 0.009525 | 2.431                    | <b>Myom1</b><br>myomesin 1                                                           |
| NM_011652///NM_028004     | 0.003352 | 2.418                    | <b>Ttn</b><br>titin                                                                  |
| NM_080639                 | 0.003399 | 2.407                    | <b>Timp4</b><br>tissue inhibitor of metalloproteinase 4                              |
| NM_080728///NM_001164171/ | 0.000419 | 2.394                    | <b>Myh7///Myh6</b><br>myosin, heavy polypeptide 7, cardiac muscle, beta/// alpha     |
| NM_001008973              | 0.007646 | 2.340                    | <b>Tmem232</b><br>transmembrane protein 232                                          |
| NM_023049                 | 0.002372 | 2.327                    | <b>Asb2</b><br>ankyrin repeat and SOCS box-containing 2                              |
| NM_026633                 | 0.000385 | 2.325                    | <b>Fam195a</b><br>family with sequence similarity 195, member A                      |
| NM_027395                 | 0.003440 | 2.324                    | <b>Basp1</b><br>brain abundant, membrane attached signal protein 1                   |
| NM_001276387///NM_010095  | 0.000310 | 2.321                    | <b>Ebf2</b><br>early B cell factor 2                                                 |
| NM_001033170              | 0.000261 | 2.300                    | <b>Fam83e</b><br>family with sequence similarity 83, member E                        |
| NM_153801                 | 0.001195 | 2.282                    | <b>Tecrl</b><br>trans-2,3-enoyl-CoA reductase-like                                   |
| NM_001122635///NM_177090/ | 0.002613 | 2.247                    | <b>Cdhr4</b><br>cadherin-related family member 4                                     |
| NM_001039543///NM_010801  | 0.004318 | 2.244                    | <b>Mlf1</b><br>myeloid leukemia factor 1                                             |
| NM_001034168///NM_178655  | 0.004238 | 2.238                    | <b>Ank2</b><br>ankyrin 2, brain                                                      |
| NM_001170847              | 0.001080 | 2.228                    | <b>Rbm20</b><br>RNA binding motif protein 20                                         |
| NM_010362                 | 0.007650 | 2.216                    | <b>Gsto1</b><br>glutathione S-transferase omega 1                                    |
| NM_001081425              | 0.008401 | 2.193                    | <b>Rbm24</b><br>RNA binding motif protein 24                                         |
| NM_001081984///NM_022318  | 0.003675 | 2.186                    | <b>Popdc2</b><br>popeye domain containing 2                                          |
| NM_009204                 | 0.003733 | 2.185                    | <b>Slc2a4</b><br>solute carrier family 2 (facilitated glucose transporter), member 4 |
| NM_001177373///NM_019974  | 0.003130 | 2.176                    | <b>Klk11</b><br>kallikrein related-peptidase 11                                      |
| NM_001160127///NM_009762  | 0.004209 | 2.155                    | <b>Smyd1</b><br>SET and MYND domain containing 1                                     |
| NM_009129                 | 0.000526 | 2.118                    | <b>Scg2</b><br>secretogranin II                                                      |
| NM_025529                 | 0.003592 | 2.115                    | <b>Nudt8</b><br>nudix (nucleoside diphosphate linked moiety X)-type motif 8          |
| NM_029920                 | 0.004363 | 2.105                    | <b>Mtus2</b><br>microtubule associated tumor suppressor candidate 2                  |
| NM_026443                 | 0.004267 | 2.073                    | <b>Mtfp1</b><br>mitochondrial fission process 1                                      |
| NM_001110140///NM_009722/ | 0.003410 | 2.070                    | <b>Atp2a2</b><br>ATPase, Ca++ transporting, cardiac muscle, slow twitch 2            |
| NM_181728                 | 0.003706 | 2.055                    | <b>Art3</b><br>ADP-ribosyltransferase 3                                              |
| NM_001162878///NM_029283  | 0.007160 | 2.049                    | <b>Fam183b</b><br>family with sequence similarity 183, member B                      |
| NM_001081369              | 0.007703 | 2.038                    | <b>Ccdc153</b><br>coiled-coil domain containing 153                                  |

| RefSeq Transcript ID       | p        | *FC (SFN vs Gene Symbol) | Gene Title                                                                                       |
|----------------------------|----------|--------------------------|--------------------------------------------------------------------------------------------------|
| NM_008963                  | 0.008434 | 2.007                    | <i>Ptgds</i><br>prostaglandin D2 synthase (brain)                                                |
| NM_207531                  | 0.008918 | 1.994                    | <i>Agr3</i><br>anterior gradient 3                                                               |
| NM_016966///NR_076393      | 0.001802 | 1.982                    | <i>Phgdh</i><br>3-phosphoglycerate dehydrogenase                                                 |
| NM_001162998               | 0.000639 | 1.967                    | <i>Smim6</i><br>small integral membrane protein 6                                                |
| NM_013473                  | 0.009288 | 1.963                    | <i>Anxa8</i><br>annexin A8                                                                       |
| NM_054098                  | 0.006300 | 1.956                    | <i>Steap4</i><br>STEAP family member 4                                                           |
| NM_001168318///NM_028903   | 0.005314 | 1.955                    | <i>Scara5</i><br>scavenger receptor class A, member 5 (putative)                                 |
| NM_172469                  | 0.009787 | 1.954                    | <i>Clic6</i><br>chloride intracellular channel 6                                                 |
| NM_001146217///NM_022316   | 0.003897 | 1.953                    | <i>Smoc1</i><br>SPARC related modular calcium binding 1                                          |
| NM_001122683///NM_175177   | 0.005542 | 1.949                    | <i>Bdh1</i><br>3-hydroxybutyrate dehydrogenase, type 1                                           |
| NM_007906                  | 0.004963 | 1.945                    | <i>Eef1a2</i><br>eukaryotic translation elongation factor 1 alpha 2                              |
| NM_008509                  | 0.000706 | 1.911                    | <i>Lpl</i><br>lipoprotein lipase                                                                 |
| NM_133681                  | 0.006145 | 1.902                    | <i>Tspan1</i><br>tetraspanin 1                                                                   |
| NM_010444                  | 0.000053 | 1.901                    | <i>Nr4a1</i><br>nuclear receptor subfamily 4, group A, member 1                                  |
| NM_133689                  | 0.008347 | 1.896                    | <i>Ppp1r32</i><br>protein phosphatase 1, regulatory subunit 32                                   |
| NM_145562                  | 0.005681 | 1.891                    | <i>Parm1</i><br>prostate androgen-regulated mucin-like protein 1                                 |
| NM_001166173///NM_00116610 | 0.007545 | 1.889                    | <i>Dmkn</i><br>dermokine                                                                         |
| NM_009063                  | 0.005394 | 1.887                    | <i>Rgs5</i><br>regulator of G-protein signaling 5                                                |
| NM_009026                  | 0.002284 | 1.881                    | <i>Rasd1</i><br>RAS, dexamethasone-induced 1                                                     |
| NM_177629                  | 0.007964 | 1.872                    | <i>Fam216b</i><br>family with sequence similarity 216, member B                                  |
| NM_026438                  | 0.003181 | 1.852                    | <i>Ppa1</i><br>pyrophosphatase (inorganic) 1                                                     |
| NM_001197028///NM_028813   | 0.000133 | 1.850                    | <i>Vit</i><br>vitrin                                                                             |
| NM_001145948///NM_153392   | 0.007162 | 1.840                    | <i>Ttc39a</i><br>tetratricopeptide repeat domain 39A                                             |
| NM_001161419///NM_007506   | 0.008970 | 1.836                    | <i>Atp5g1</i><br>ATP synthase, H+ transporting, mitochondrial F0 complex, subunit c1 (subunit 9) |
| NM_027951                  | 0.007729 | 1.827                    | <i>Tekt4</i><br>tektin 4                                                                         |
| NM_001204252///NM_010796   | 0.000713 | 1.824                    | <i>Clec10a</i><br>C-type lectin domain family 10, member A                                       |
| NM_001162973///NM_00116290 | 0.007996 | 1.821                    | <i>Lrrc51</i><br>leucine rich repeat containing 51                                               |
| NM_008630                  | 0.009726 | 1.820                    | <i>Mt2</i><br>metallothionein 2                                                                  |
| NM_080637                  | 0.005412 | 1.813                    | <i>Nme5</i><br>NME/NM23 family member 5                                                          |
| NM_009922                  | 0.001738 | 1.813                    | <i>Cnn1</i><br>calponin 1                                                                        |
| NM_001163103               | 0.002251 | 1.799                    | <i>Ppp1r36</i><br>protein phosphatase 1, regulatory subunit 36                                   |
| NM_010726                  | 0.001562 | 1.790                    | <i>Phyh</i><br>phytanoyl-CoA hydroxylase                                                         |
| NM_009879                  | 0.000534 | 1.784                    | <i>Ift81</i><br>intraflagellar transport 81                                                      |
| NM_030677                  | 0.004519 | 1.780                    | <i>Gpx2</i><br>glutathione peroxidase 2                                                          |
| NM_008904///NR_027710      | 0.005380 | 1.765                    | <i>Ppargc1a</i><br>peroxisome proliferative activated receptor, gamma, coactivator 1 alpha       |
| NM_007995                  | 0.009159 | 1.763                    | <i>Fcna</i><br>ficolin A                                                                         |
| NM_029556                  | 0.007158 | 1.757                    | <i>Clybl</i><br>citrate lyase beta like                                                          |

| RefSeq Transcript ID      | p        | *FC (SFN vs Gene Symbol) | Gene Title                                                                                           |
|---------------------------|----------|--------------------------|------------------------------------------------------------------------------------------------------|
| NM_007381                 | 0.000591 | 1.753                    | <b>Acadl</b><br>acyl-Coenzyme A dehydrogenase, long-chain                                            |
| NM_181816                 | 0.006992 | 1.752                    | <b>Ccdc67</b><br>coiled-coil domain containing 67                                                    |
| NM_172604                 | 0.002839 | 1.751                    | <b>Scara3</b><br>scavenger receptor class A, member 3                                                |
| NM_178378                 | 0.001773 | 1.740                    | <b>Iqcg</b><br>IQ motif containing G                                                                 |
| NM_010924                 | 0.001189 | 1.739                    | <b>Nnmt</b><br>nicotinamide N-methyltransferase                                                      |
| NM_080633                 | 0.002091 | 1.735                    | <b>Aco2</b><br>aconitase 2, mitochondrial                                                            |
| NM_009208                 | 0.003513 | 1.734                    | <b>Slc4a3</b><br>solute carrier family 4 (anion exchanger), member 3                                 |
| NM_177068                 | 0.002176 | 1.733                    | <b>Olfml2b</b><br>olfactomedin-like 2B                                                               |
| NM_001002927              | 0.003844 | 1.731                    | <b>Penk</b><br>preproenkephalin                                                                      |
| NM_001033443              | 0.009668 | 1.706                    | <b>Cdkl4</b><br>cyclin-dependent kinase-like 4                                                       |
| NM_001195431///NM_012043  | 0.008170 | 1.702                    | <b>Islr</b><br>immunoglobulin superfamily containing leucine-rich repeat                             |
| NM_146052                 | 0.008670 | 1.702                    | <b>Lrrc3b</b><br>leucine rich repeat containing 3B                                                   |
| NM_008035                 | 0.001255 | 1.700                    | <b>Folr2</b><br>folate receptor 2 (fetal)                                                            |
| NM_001159731///NM_009107  | 0.006011 | 1.700                    | <b>Rxrg</b><br>retinoid X receptor gamma                                                             |
| NM_001164640///NM_029419/ | 0.000338 | 1.699                    | <b>Apol7a///Apol7c</b><br>apolipoprotein L 7a///apolipoprotein L 7c///apolipoprotein L 7c pseudogene |
| NM_029784                 | 0.000661 | 1.697                    | <b>Fam81a</b><br>family with sequence similarity 81, member A                                        |
| NM_007808                 | 0.002115 | 1.697                    | <b>Cyts</b><br>cytochrome c, somatic                                                                 |
| NM_023557                 | 0.006981 | 1.694                    | <b>Slc44a4</b><br>solute carrier family 44, member 4                                                 |
| NM_001164248///NM_0011642 | 0.007401 | 1.691                    | <b>Tpm1</b><br>tropomyosin 1, alpha                                                                  |
| NM_013569                 | 0.004710 | 1.691                    | <b>Kcnh2</b><br>potassium voltage-gated channel, subfamily H (eag-related), member 2                 |
| NM_025567                 | 0.004231 | 1.682                    | <b>Cyc1</b><br>cytochrome c-1                                                                        |
| NM_198414                 | 0.006936 | 1.680                    | <b>Paqr9</b><br>progesterone and adiponectin receptor family member IX                               |
| NM_011309                 | 0.007218 | 1.677                    | <b>S100a1</b><br>S100 calcium binding protein A1                                                     |
| NM_008013                 | 0.009346 | 1.673                    | <b>Fgl2</b><br>fibrinogen-like protein 2                                                             |
| NM_013603                 | 0.000673 | 1.667                    | <b>Mt3</b><br>metallothionein 3                                                                      |
| NM_001205076///NM_021566/ | 0.005270 | 1.667                    | <b>Jph2</b><br>junctophilin 2                                                                        |
| NM_007981                 | 0.000617 | 1.662                    | <b>Acsl1</b><br>acyl-CoA synthetase long-chain family member 1                                       |
| NM_001159577///NM_0011595 | 0.004290 | 1.660                    | <b>Lnx1</b><br>ligand of numb-protein X 1                                                            |
| NM_007382                 | 0.001168 | 1.655                    | <b>Acadm</b><br>acyl-Coenzyme A dehydrogenase, medium chain                                          |
| NM_001013386              | 0.003063 | 1.655                    | <b>Rasl10b</b><br>RAS-like, family 10, member B                                                      |
| NM_153527                 | 0.003896 | 1.654                    | <b>Dnajb13</b><br>DnaJ (Hsp40) related, subfamily B, member 13                                       |
| NM_027728                 | 0.009273 | 1.653                    | <b>Enkur</b><br>enkurin, TRPC channel interacting protein                                            |
| NM_010844                 | 0.006683 | 1.650                    | <b>Muc5ac</b><br>mucin 5, subtypes A and C, tracheobronchial/gastric                                 |
| NM_025794                 | 0.000643 | 1.643                    | <b>Etfdh</b><br>electron transferring flavoprotein, dehydrogenase                                    |
| NM_001190373              | 0.004985 | 1.641                    | <b>Kcng2</b><br>potassium voltage-gated channel, subfamily G, member 2                               |
| NM_001033784///NM_028384  | 0.001304 | 1.640                    | <b>Ccdc13</b><br>coiled-coil domain containing 13                                                    |
| NM_026439                 | 0.001603 | 1.634                    | <b>Ccdc80</b><br>coiled-coil domain containing 80                                                    |

| RefSeq Transcript ID              | p        | *FC (SFN vs Gene Symbol) | Gene Title                                                                                  |
|-----------------------------------|----------|--------------------------|---------------------------------------------------------------------------------------------|
| NM_001160038///NM_001160038       | 0.005983 | 1.634                    | <b>Ndufs1</b><br>NADH dehydrogenase (ubiquinone) Fe-S protein 1                             |
| NM_001146196///NM_009132          | 0.000584 | 1.632                    | <b>Scin</b><br>scinderin                                                                    |
| NM_011838                         | 0.007814 | 1.629                    | <b>Lynx1</b><br>Ly6/neurotoxin 1                                                            |
| NM_026452                         | 0.007411 | 1.624                    | <b>Coq9</b><br>coenzyme Q9 homolog (yeast)                                                  |
| NM_010043                         | 0.007743 | 1.619                    | <b>Des</b><br>desmin                                                                        |
| NM_017366                         | 0.000897 | 1.616                    | <b>Acadvl</b><br>acyl-Coenzyme A dehydrogenase, very long chain                             |
| NM_139269                         | 0.000140 | 1.615                    | <b>Pla2g16</b><br>phospholipase A2, group XVI                                               |
| NM_009849                         | 0.004704 | 1.611                    | <b>Entpd2</b><br>ectonucleoside triphosphate diphosphohydrolase 2                           |
| NM_026865                         | 0.004553 | 1.611                    | <b>Ptges3l</b><br>prostaglandin E synthase 3 (cytosolic)-like                               |
| NM_001199337///NM_001199337       | 0.002441 | 1.609                    | <b>Apoa</b><br>apolipoprotein O                                                             |
| NM_020047                         | 0.001244 | 1.607                    | <b>Tacstd2</b><br>tumor-associated calcium signal transducer 2                              |
| NM_153781                         | 0.002975 | 1.606                    | <b>Pygb</b><br>brain glycogen phosphorylase                                                 |
| NM_028177                         | 0.000642 | 1.605                    | <b>Ndufab1</b><br>NADH dehydrogenase (ubiquinone) 1, alpha/beta subcomplex, 1               |
| NM_172864                         | 0.005757 | 1.596                    | <b>Wdr63</b><br>WD repeat domain 63                                                         |
| NM_025557                         | 0.009637 | 1.591                    | <b>Pcp4l1</b><br>Purkinje cell protein 4-like 1                                             |
| NM_026614                         | 0.003124 | 1.587                    | <b>Ndufa5</b><br>NADH dehydrogenase (ubiquinone) 1 alpha subcomplex, 5                      |
| NM_001163621///NM_028010          | 0.005540 | 1.585                    | <b>Apol6</b><br>apolipoprotein L 6                                                          |
| NM_011347                         | 0.009181 | 1.584                    | <b>Selp</b><br>selectin, platelet                                                           |
| NM_023374///XM_003946338          | 0.003531 | 1.584                    | <b>Sdhb</b><br>succinate dehydrogenase [ubiquinone] iron-sulfur subunit, mitochondrial-like |
| NM_177564                         | 0.005461 | 1.582                    | <b>Dhrs11</b><br>dehydrogenase/reductase (SDR family) member 11                             |
| NM_025384                         | 0.003746 | 1.581                    | <b>Dnajc15</b><br>DnaJ (Hsp40) homolog, subfamily C, member 15                              |
| NM_025710                         | 0.001482 | 1.578                    | <b>Uqcrcs1</b><br>ubiquinol-cytochrome c reductase, Rieske iron-sulfur polypeptide 1        |
| NM_009028                         | 0.000950 | 1.576                    | <b>Rasl2-9</b><br>RAS-like, family 2, locus 9                                               |
| NM_134147                         | 0.006444 | 1.576                    | <b>Macrocl1</b><br>MACRO domain containing 1                                                |
| NM_026172                         | 0.000780 | 1.575                    | <b>Decr1</b><br>2,4-dienoyl CoA reductase 1, mitochondrial                                  |
| NM_013834                         | 0.002670 | 1.574                    | <b>Sfrp1</b><br>secreted frizzled-related protein 1                                         |
| NM_011977                         | 0.000166 | 1.572                    | <b>Slc27a1</b><br>solute carrier family 27 (fatty acid transporter), member 1               |
| NM_027244///XM_358948///XM_358948 | 0.008258 | 1.572                    | <b>Ndufa11</b><br>NADH dehydrogenase (ubiquinone) 1 alpha subcomplex 11                     |
| NM_001170395///NM_053094          | 0.000472 | 1.566                    | <b>Cd163</b><br>CD163 antigen                                                               |
| NM_001024945///NM_023268          | 0.004285 | 1.565                    | <b>Qsox1</b><br>quiescin Q6 sulfhydryl oxidase 1                                            |
| NM_001276358///NM_030716/0        | 0.004356 | 1.565                    | <b>Kcni2</b><br>Kv channel-interacting protein 2                                            |
| NM_016772                         | 0.006273 | 1.560                    | <b>Ech1</b><br>enoyl coenzyme A hydratase 1, peroxisomal                                    |
| NM_027941                         | 0.007094 | 1.559                    | <b>Lrrc34</b><br>leucine rich repeat containing 34                                          |
| NM_029573                         | 0.001189 | 1.558                    | <b>Idh3a</b><br>isocitrate dehydrogenase 3 (NAD+) alpha                                     |
| NM_007883                         | 0.004848 | 1.555                    | <b>Dsg2</b><br>desmoglein 2                                                                 |
| NM_009738                         | 0.001014 | 1.552                    | <b>Bche</b><br>butyrylcholinesterase                                                        |
| NM_025407                         | 0.003858 | 1.551                    | <b>Uqcrc1</b><br>ubiquinol-cytochrome c reductase core protein 1                            |



| RefSeq Transcript ID     | p        | *FC (SFN vs Gene Symbol) | Gene Symbol       | Gene Title                                                                          |
|--------------------------|----------|--------------------------|-------------------|-------------------------------------------------------------------------------------|
| NM_008824                | 0.001905 | 1.545                    | <b>Pfkfb1</b>     | 6-phosphofructo-2-kinase/fructose-2,6-biphosphatase 1                               |
| NM_001164763             | 0.006924 | 1.536                    | <b>Rarres1</b>    | retinoic acid receptor responder (tazarotene induced) 1                             |
| NM_021329                | 0.006906 | 1.533                    | <b>Rangrf</b>     | RAN guanine nucleotide release factor                                               |
| NM_010045                | 0.000234 | 1.527                    | <b>Darc</b>       | Duffy blood group, chemokine receptor                                               |
| NM_013754                | 0.009620 | 1.525                    | <b>Insl6</b>      | insulin-like 6                                                                      |
| NM_145615                | 0.002016 | 1.523                    | <b>Etfa</b>       | electron transferring flavoprotein, alpha polypeptide                               |
| NM_001164567///NM_011700 | 0.004181 | 1.522                    | <b>Vill</b>       | villin-like                                                                         |
| NM_025838///NM_028336    | 0.007657 | 1.521                    | <b>Tmem107</b>    | transmembrane protein 107                                                           |
| NM_009949                | 0.000229 | 1.520                    | <b>Cpt2</b>       | carnitine palmitoyltransferase 2                                                    |
| NM_012013                | 0.006327 | 1.520                    | <b>Figla</b>      | folliculogenesis specific basic helix-loop-helix                                    |
| NM_009942///XM_001475417 | 0.006443 | 1.516                    | <b>Cox5b</b>      | cytochrome c oxidase subunit 5B, mitochondrial-like                                 |
| NM_026928                | 0.009844 | 1.513                    | <b>Fuom</b>       | fucoase mutarotase                                                                  |
| NM_001122758///NM_018764 | 0.003654 | 1.509                    | <b>Pcdh7</b>      | protocadherin 7                                                                     |
| NM_175191                | 0.004150 | 1.508                    | <b>Gpr22</b>      | G protein-coupled receptor 22                                                       |
| NM_009610                | 0.001446 | 1.507                    | <b>Actg2</b>      | actin, gamma 2, smooth muscle, enteric                                              |
| NM_029422                | 0.009666 | 1.505                    | <b>Dcstamp</b>    | dendrocyte expressed seven transmembrane protein                                    |
| NM_172693                | 0.005744 | 1.504                    | <b>Galnt12</b>    | UDP-N-acetyl-alpha-D-galactosamine:polypeptide N-acetylgalactosaminyltransferase 12 |
| NM_001083891///NM_030087 | 0.004090 | 1.502                    | <b>Ndufv3</b>     | NADH dehydrogenase (ubiquinone) flavoprotein 3                                      |
| NM_026061                | 0.004816 | 1.502                    | <b>Ndufb8</b>     | NADH dehydrogenase (ubiquinone) 1 beta subcomplex 8                                 |
| NM_001185164///NM_011697 | 0.006755 | 1.501                    | <b>Vegfb</b>      | vascular endothelial growth factor B                                                |
| NM_025352                | 0.001316 | 1.499                    | <b>Uqcrcq</b>     | ubiquinol-cytochrome c reductase, complex III subunit VII                           |
|                          | 0.004029 | 1.499                    | <b>Gm11633</b>    | predicted gene 11633                                                                |
| NM_025650                | 0.009713 | 1.498                    | <b>Uqcr11</b>     | ubiquinol-cytochrome c reductase, complex III subunit XI                            |
| NM_016925                | 0.006177 | 1.497                    | <b>Fanca</b>      | Fanconi anemia, complementation group A                                             |
| NM_008993                | 0.003030 | 1.497                    | <b>Pxmp2</b>      | peroxisomal membrane protein 2                                                      |
| NM_133249                | 0.001691 | 1.496                    | <b>Ppargc1b</b>   | peroxisome proliferative activated receptor, gamma, coactivator 1 beta              |
| NM_145558                | 0.001431 | 1.495                    | <b>Hadhb</b>      | hydroxyacyl-Coenzyme A dehydrogenase, beta subunit                                  |
|                          | 0.008984 | 1.495                    | <b>D1ErtD705e</b> | DNA segment, Chr 1, ERATO Doi 705, expressed                                        |
| NM_007507                | 0.004475 | 1.495                    | <b>Atp5k</b>      | ATP synthase, H+ transporting, mitochondrial F1F0 complex, subunit e                |
| NM_001026214///NM_007647 | 0.008745 | 1.493                    | <b>Entpd5</b>     | ectonucleoside triphosphate diphosphohydrolase 5                                    |
| NM_001042615///NM_030127 | 0.006916 | 1.493                    | <b>Htra3</b>      | HtrA serine peptidase 3                                                             |
| NM_177235                | 0.009028 | 1.487                    | <b>Bend6</b>      | BEN domain containing 6                                                             |
| NM_145614                | 0.002263 | 1.487                    | <b>Dlat</b>       | dihydrolipoamide S-acetyltransferase                                                |
| NM_008618                | 0.004165 | 1.486                    | <b>Mdh1</b>       | malate dehydrogenase 1, NAD (soluble)                                               |
| NM_009264                | 0.005077 | 1.486                    | <b>Sprr1a</b>     | small proline-rich protein 1A                                                       |
| NM_007633                | 0.003390 | 1.485                    | <b>Ccne1</b>      | cyclin E1                                                                           |
| NM_026818                | 0.004610 | 1.485                    | <b>Cilp2</b>      | cartilage intermediate layer protein 2                                              |

| RefSeq Transcript ID       | p        | *FC (SFN vs Gene Symbol) | Gene Symbol            | Gene Title                                                                                |
|----------------------------|----------|--------------------------|------------------------|-------------------------------------------------------------------------------------------|
| NM_025358                  | 0.003184 | 1.484                    | <b>Ndufa9</b>          | NADH dehydrogenase (ubiquinone) 1 alpha subcomplex, 9                                     |
| NM_007747                  | 0.001660 | 1.481                    | <b>Cox5a</b>           | cytochrome c oxidase subunit Va                                                           |
| NM_172793                  | 0.002396 | 1.479                    | <b>Btn19</b>           | butyrophilin-like 9                                                                       |
| NM_001102404//NM_001102404 | 0.000757 | 1.479                    | <b>Acp5</b>            | acid phosphatase 5, tartrate resistant                                                    |
| NM_177470                  | 0.005908 | 1.478                    | <b>Acaa2</b>           | acetyl-Coenzyme A acyltransferase 2 (mitochondrial 3-oxoacyl-Coenzyme A thiolase)         |
| NM_026695//NR_075104       | 0.002112 | 1.477                    | <b>Etfb</b>            | electron transferring flavoprotein, beta polypeptide                                      |
| NM_024197                  | 0.003016 | 1.474                    | <b>Ndufa10</b>         | NADH dehydrogenase (ubiquinone) 1 alpha subcomplex 10                                     |
| NM_027733//NM_029485       | 0.003720 | 1.472                    | <b>Spata24</b>         | spermatogenesis associated 24                                                             |
| NM_001163510//NM_008433    | 0.004904 | 1.469                    | <b>Kcnn4</b>           | potassium intermediate/small conductance calcium-activated channel, subfamily N, member 4 |
| NM_001033458               | 0.008727 | 1.468                    | <b>Gm1673</b>          | predicted gene 1673                                                                       |
| NM_023842                  | 0.005994 | 1.468                    | <b>Dsp</b>             | desmoplakin                                                                               |
| NM_153107                  | 0.005334 | 1.466                    | <b>Cpz</b>             | carboxypeptidase Z                                                                        |
| NM_019737                  | 0.001601 | 1.465                    | <b>B4galt6</b>         | UDP-Gal:betaGlcNAc beta 1,4-galactosyltransferase, polypeptide 6                          |
| NM_001004138//NM_010609    | 0.005772 | 1.462                    | <b>Kcnk7</b>           | potassium channel, subfamily K, member 7                                                  |
| NM_001252459//NM_001252459 | 0.002077 | 1.461                    | <b>Cyfp2</b>           | cytoplasmic FMR1 interacting protein 2                                                    |
| NM_023172                  | 0.009839 | 1.457                    | <b>Ndufb9</b>          | NADH dehydrogenase (ubiquinone) 1 beta subcomplex, 9                                      |
| XM_134476//XM_910911       | 0.005551 | 1.457                    | <b>Ces1h</b>           | carboxylesterase 1H                                                                       |
| NM_001083904//NM_001083904 | 0.006885 | 1.456                    | <b>Fetub</b>           | fetuin beta                                                                               |
| NM_001112722//NM_001112722 | 0.000151 | 1.455                    | <b>Arhgef10l</b>       | Rho guanine nucleotide exchange factor (GEF) 10-like                                      |
| NM_001034876//NM_001253301 | 0.006979 | 1.452                    | <b>B4galt2//Ccgc24</b> | UDP-Gal:betaGlcNAc beta 1,4- galactosyltransferase, polypeptide 2                         |
| NM_146108                  | 0.004232 | 1.449                    | <b>Hibch</b>           | 3-hydroxyisobutyryl-Coenzyme A hydrolase                                                  |
| NM_020567                  | 0.000820 | 1.449                    | <b>Gmnn</b>            | geminin                                                                                   |
| NM_020519                  | 0.009054 | 1.447                    | <b>Slurp1</b>          | secreted Ly6/Plaur domain containing 1                                                    |
| NM_145924                  | 0.003666 | 1.446                    | <b>Cenpi</b>           | centromere protein I                                                                      |
| NM_001198914//NM_010848/   | 0.003252 | 1.446                    | <b>Myb</b>             | myeloblastosis oncogene                                                                   |
| NM_001190451//NM_007833    | 0.000613 | 1.445                    | <b>Dcn</b>             | decorin                                                                                   |
| NM_001271019//NM_145581    | 0.000197 | -3.092                   | <b>Siglec5</b>         | sialic acid binding Ig-like lectin 5                                                      |
| NM_175692                  | 0.005718 | -2.994                   | <b>Snhg11</b>          | small nucleolar RNA host gene 11                                                          |
| NM_001039181//NM_008728    | 0.002168 | -2.932                   | <b>Npr3</b>            | natriuretic peptide receptor 3                                                            |
| NM_001123394               | 0.009199 | -2.485                   | <b>Ang3</b>            | angiogenin, ribonuclease A family, member 3                                               |
| NR_045048                  | 0.000024 | -2.374                   | <b>Gm19990</b>         | predicted gene, 19990                                                                     |
| NM_007746                  | 0.005517 | -2.354                   | <b>Map3k8</b>          | mitogen-activated protein kinase kinase kinase 8                                          |
| NM_134110                  | 0.000190 | -2.186                   | <b>Kcne2</b>           | potassium voltage-gated channel, Isk-related subfamily, gene 2                            |
| NM_007894//XM_003946320/   | 0.001116 | -2.068                   | <b>Ear1</b>            | eosinophil-associated, ribonuclease A family, member 1                                    |
| NM_001081088               | 0.000215 | -2.055                   | <b>Lrp2</b>            | low density lipoprotein receptor-related protein 2                                        |
| NM_008604                  | 0.000035 | -2.050                   | <b>Mme</b>             | membrane metallo endopeptidase                                                            |
| NM_001163136               | 0.001726 | -2.031                   | <b>Macc1</b>           | metastasis associated in colon cancer 1                                                   |



| RefSeq Transcript ID      | p        | *FC (SFN vs Gene Symbol) | Gene Symbol                   | Gene Title                                                                   |
|---------------------------|----------|--------------------------|-------------------------------|------------------------------------------------------------------------------|
| NM_138648                 | 0.001730 | -2.000                   | <b><i>Olr1</i></b>            | oxidized low density lipoprotein (lectin-like) receptor 1                    |
| NM_019683                 | 0.002782 | -1.997                   | <b><i>Ankrd49</i></b>         | ankyrin repeat domain 49                                                     |
| NM_139306                 | 0.000007 | -1.966                   | <b><i>Acer2</i></b>           | alkaline ceramidase 2                                                        |
| NM_009892///NM_145126     | 0.003663 | -1.959                   | <b><i>Chi3l3///Chi3l4</i></b> | chitinase 3-like 3///chitinase 3-like 4                                      |
| NM_010406                 | 0.002831 | -1.954                   | <b><i>Hc</i></b>              | hemolytic complement                                                         |
| NM_027468                 | 0.008751 | -1.952                   | <b><i>Cpm</i></b>             | carboxypeptidase M                                                           |
| NM_023794                 | 0.003856 | -1.910                   | <b><i>Etv5</i></b>            | ets variant gene 5                                                           |
| NM_009036                 | 0.000697 | -1.910                   | <b><i>Rbpjl</i></b>           | recombination signal binding protein for immunoglobulin kappa J region-like  |
| NM_010172                 | 0.007265 | -1.909                   | <b><i>F7</i></b>              | coagulation factor VII                                                       |
| NM_007548                 | 0.006406 | -1.903                   | <b><i>Prdm1</i></b>           | PR domain containing 1, with ZNF domain                                      |
| NM_001004173              | 0.000188 | -1.877                   | <b><i>Sgpp2</i></b>           | sphingosine-1-phosphate phosphatase 2                                        |
| NM_019397                 | 0.000031 | -1.865                   | <b><i>Egfl6</i></b>           | EGF-like-domain, multiple 6                                                  |
| NM_001167997///NM_031384  | 0.000784 | -1.864                   | <b><i>Tex11</i></b>           | testis expressed gene 11                                                     |
| NM_175522                 | 0.000291 | -1.840                   | <b><i>Elfn1</i></b>           | leucine rich repeat and fibronectin type III, extracellular 1                |
| NM_001081212              | 0.008374 | -1.839                   | <b><i>Irs2</i></b>            | insulin receptor substrate 2                                                 |
| NM_001163314///NM_175508  | 0.003477 | -1.798                   | <b><i>Pgap1</i></b>           | post-GPI attachment to proteins 1                                            |
| NM_031198                 | 0.002433 | -1.789                   | <b><i>Tfec</i></b>            | transcription factor EC                                                      |
| NM_021050                 | 0.004268 | -1.775                   | <b><i>Cftr</i></b>            | cystic fibrosis transmembrane conductance regulator                          |
| NM_001113323              | 0.000458 | -1.772                   | <b><i>Glb1l3</i></b>          | galactosidase, beta 1 like 3                                                 |
| NM_001136496///NM_178875  | 0.006909 | -1.771                   | <b><i>Zfp935</i></b>          | zinc finger protein 935                                                      |
| NM_133241                 | 0.002674 | -1.764                   | <b><i>Mlc1</i></b>            | megalencephalic leukoencephalopathy with subcortical cysts 1 homolog (human) |
| NM_001161731///NM_007447  | 0.000038 | -1.763                   | <b><i>Ang</i></b>             | angiogenin, ribonuclease, RNase A family, 5                                  |
| NM_015760                 | 0.001601 | -1.760                   | <b><i>Nox4</i></b>            | NADPH oxidase 4                                                              |
| NM_001159986///NM_033354/ | 0.001035 | -1.759                   | <b><i>Sec16b</i></b>          | SEC16 homolog B (S. cerevisiae)                                              |
| NM_175406                 | 0.007123 | -1.753                   | <b><i>Atp6v0d2</i></b>        | ATPase, H+ transporting, lysosomal V0 subunit D2                             |
| NM_011066                 | 0.002544 | -1.751                   | <b><i>Per2</i></b>            | period circadian clock 2                                                     |
| NM_001002900///NM_0010246 | 0.001061 | -1.748                   | <b><i>Higd1c</i></b>          | HIG1 domain family, member 1C                                                |
| NM_023396                 | 0.001272 | -1.748                   | <b><i>Rprm</i></b>            | reprimin, TP53 dependent G2 arrest mediator candidate                        |
| NM_009421                 | 0.009479 | -1.744                   | <b><i>Traf1</i></b>           | TNF receptor-associated factor 1                                             |
| NM_053190                 | 0.002658 | -1.733                   | <b><i>S1pr5</i></b>           | sphingosine-1-phosphate receptor 5                                           |
| NM_198170                 | 0.004669 | -1.731                   | <b><i>Szt2</i></b>            | seizure threshold 2                                                          |
| NM_145219                 | 0.008043 | -1.730                   | <b><i>Lgi3</i></b>            | leucine-rich repeat LGI family, member 3                                     |
| NM_001276719///NM_021609  | 0.000402 | -1.723                   | <b><i>Ccbp2</i></b>           | chemokine binding protein 2                                                  |
| NM_001163660///NM_027280  | 0.001873 | -1.723                   | <b><i>Nkd1</i></b>            | naked cuticle 1 homolog (Drosophila)                                         |
| NM_009789                 | 0.007760 | -1.721                   | <b><i>S100g</i></b>           | S100 calcium binding protein G                                               |
| NM_029415                 | 0.000441 | -1.717                   | <b><i>Slc10a6</i></b>         | solute carrier family 10 (sodium/bile acid cotransporter family), member 6   |
| NM_001164724///NM_133775  | 0.008283 | -1.701                   | <b><i>Il33</i></b>            | interleukin 33                                                               |

| RefSeq Transcript ID      | p        | *FC (SFN vs Gene Symbol) | Gene Title                                                                                  |
|---------------------------|----------|--------------------------|---------------------------------------------------------------------------------------------|
| NM_001001883///NM_172655  | 0.001656 | -1.700                   | <b>Hecw2</b><br>HECT, C2 and WW domain containing E3 ubiquitin protein ligase 2             |
| NM_030697                 | 0.008440 | -1.697                   | <b>Kank3</b><br>KN motif and ankyrin repeat domains 3                                       |
| NM_013838                 | 0.001124 | -1.690                   | <b>Trpc6</b><br>transient receptor potential cation channel, subfamily C, member 6          |
| NM_027052                 | 0.002678 | -1.690                   | <b>Slc38a4</b><br>solute carrier family 38, member 4                                        |
| NM_009511///XM_003946399  | 0.005856 | -1.687                   | <b>Vipr2</b><br>vasoactive intestinal peptide receptor 2                                    |
| NM_012033                 | 0.003874 | -1.678                   | <b>Tinag</b><br>tubulointerstitial nephritis antigen                                        |
| NM_001033258              | 0.000818 | -1.668                   | <b>D10Bwg1379e</b><br>DNA segment, Chr 10, Brigham & Women's Genetics 1379 expressed        |
| NM_025730                 | 0.002555 | -1.667                   | <b>Lrrk2</b><br>leucine-rich repeat kinase 2                                                |
| NM_001024846///NM_009562  | 0.000481 | -1.659                   | <b>Zfp62</b><br>zinc finger protein 62                                                      |
| NM_026352///NM_177356     | 0.001217 | -1.650                   | <b>Lamp3///Ppid</b><br>lysosomal-associated membrane protein 3///peptidylprolyl isomerase D |
| NM_001037723///NM_0010377 | 0.001754 | -1.647                   | <b>Adcy7</b><br>adenylate cyclase 7                                                         |
| NM_001040654///NM_009877  | 0.004841 | -1.636                   | <b>Cdkn2a</b><br>cyclin-dependent kinase inhibitor 2A                                       |
| NM_172839                 | 0.001023 | -1.632                   | <b>Ccnj</b><br>cyclin J                                                                     |
| NM_007901                 | 0.000789 | -1.630                   | <b>S1pr1</b><br>sphingosine-1-phosphate receptor 1                                          |
| NM_009616                 | 0.001370 | -1.630                   | <b>Adam19</b><br>a disintegrin and metallopeptidase domain 19 (meltrin beta)                |
| NM_008730                 | 0.000375 | -1.628                   | <b>Nptx1</b><br>neuronal pentraxin 1                                                        |
| NR_002870                 | 0.006014 | -1.627                   | <b>Dnm3os</b><br>dynamin 3, opposite strand                                                 |
| NM_010728                 | 0.001849 | -1.621                   | <b>Lox</b><br>lysyl oxidase                                                                 |
| NM_212457                 | 0.006216 | -1.619                   | <b>Bex4</b><br>brain expressed gene 4                                                       |
| NM_008317///NM_019750     | 0.002391 | -1.616                   | <b>Hyal1///Nat6</b><br>hyaluronoglucosaminidase 1///N-acetyltransferase 6                   |
| NM_001172481///NM_025711  | 0.003787 | -1.611                   | <b>Aspn</b><br>asporin                                                                      |
| NM_013930                 | 0.009647 | -1.607                   | <b>Aass</b><br>aminoadipate-semialdehyde synthase                                           |
| NM_177239                 | 0.006622 | -1.605                   | <b>Mysm1</b><br>myb-like, SWIRM and MPN domains 1                                           |
| NM_181595                 | 0.005654 | -1.604                   | <b>Ppp1r9a</b><br>protein phosphatase 1, regulatory (inhibitor) subunit 9A                  |
| NM_008720                 | 0.007785 | -1.603                   | <b>Npc1</b><br>Niemann Pick type C1                                                         |
| NM_001163493///NM_146258  | 0.002365 | -1.599                   | <b>Stard13</b><br>StAR-related lipid transfer (START) domain containing 13                  |
| NM_178702                 | 0.002633 | -1.598                   | <b>Radil</b><br>Ras association and DIL domains                                             |
| NM_178935                 | 0.001568 | -1.596                   | <b>Txlng</b><br>taxilin gamma                                                               |
| NM_007419                 | 0.004080 | -1.593                   | <b>Adrb1</b><br>adrenergic receptor, beta 1                                                 |
| NM_019790                 | 0.002189 | -1.593                   | <b>Tmeff2</b><br>transmembrane protein with EGF-like and two follistatin-like domains 2     |
| NM_145442                 | 0.003055 | -1.591                   | <b>Mbip</b><br>MAP3K12 binding inhibitory protein 1                                         |
| NM_198702                 | 0.002951 | -1.590                   | <b>Lphn3</b><br>latrophilin 3                                                               |
| NM_026433                 | 0.000464 | -1.589                   | <b>Tmem100</b><br>transmembrane protein 100                                                 |
| NM_027594                 | 0.006785 | -1.587                   | <b>Ttll7</b><br>tubulin tyrosine ligase-like family, member 7                               |
| XR_141471///XR_142117     | 0.002980 | -1.586                   | <b>Gm17739</b><br>predicted gene, 17739                                                     |
| NM_001038696///NM_026043/ | 0.006678 | -1.585                   | <b>Rnpc3///Amy1</b><br>RNA-binding region (RNP1, RRM) containing 3///amylase 1, salivary    |
| NM_033079                 | 0.000362 | -1.579                   | <b>M1ap</b><br>meiosis 1 associated protein                                                 |

| RefSeq Transcript ID       | p        | *FC (SFN vs Gene Symbol) | Gene Symbol               | Gene Title                                                                             |
|----------------------------|----------|--------------------------|---------------------------|----------------------------------------------------------------------------------------|
| NM_029620                  | 0.002243 | -1.575                   | <b>Pcolce2</b>            | procollagen C-endopeptidase enhancer 2                                                 |
| NM_008437                  | 0.001484 | -1.569                   | <b>Napsa</b>              | napsin A aspartic peptidase                                                            |
| NM_009623                  | 0.006958 | -1.567                   | <b>Adcy8</b>              | adenylate cyclase 8                                                                    |
| NM_022319                  | 0.006438 | -1.566                   | <b>Clstn2</b>             | calyntenin 2                                                                           |
| NM_001243132///NM_027533   | 0.001888 | -1.561                   | <b>Tspan2</b>             | tetraspanin 2                                                                          |
| NM_134160                  | 0.001418 | -1.561                   | <b>Mcoln3</b>             | mucoilin 3                                                                             |
| NM_172991                  | 0.005479 | -1.557                   | <b>Rbm48</b>              | RNA binding motif protein 48                                                           |
| NM_009016///NM_009017///N  | 0.001152 | -1.555                   | <b>Raet1a</b>             | retinoic acid early transcript 1, alpha                                                |
| NM_133710                  | 0.008281 | -1.553                   | <b>Ctdspl</b>             | CTD (carboxy-terminal domain, RNA polymerase II, polypeptide A) small phosphatase-like |
| NR_027799                  | 0.008929 | -1.552                   | <b>Tbrg3</b>              | transforming growth factor beta regulated gene 3                                       |
| NM_139142                  | 0.000853 | -1.551                   | <b>Slc6a20a</b>           | solute carrier family 6 (neurotransmitter transporter), member 20A                     |
| NM_007934                  | 0.003239 | -1.550                   | <b>Enpep</b>              | glutamyl aminopeptidase                                                                |
| NM_001164885///NM_022882   | 0.006686 | -1.546                   | <b>Lpin2</b>              | lipin 2                                                                                |
| NM_001076676///NM_0012524  | 0.002149 | -1.545                   | <b>Usp33</b>              | ubiquitin specific peptidase 33                                                        |
| NM_001099319///NM_177462   | 0.001566 | -1.541                   | <b>Zmym6</b>              | zinc finger, MYM-type 6                                                                |
| NM_008587///XM_003689343   | 0.003233 | -1.541                   | <b>Mertk</b>              | c-mer proto-oncogene tyrosine kinase                                                   |
| NM_001163332///NM_0011633  | 0.002572 | -1.540                   | <b>Cttnbp2nl</b>          | CTTNBP2 N-terminal like                                                                |
| NM_175930                  | 0.001041 | -1.540                   | <b>Rapgef5</b>            | Rap guanine nucleotide exchange factor (GEF) 5                                         |
| NM_026929                  | 0.006020 | -1.535                   | <b>Chac1</b>              | ChaC, cation transport regulator 1                                                     |
| NM_010638                  | 0.004873 | -1.532                   | <b>Klf9</b>               | Kruppel-like factor 9                                                                  |
| NM_144862                  | 0.000600 | -1.531                   | <b>Lims2</b>              | LIM and senescent cell antigen like domains 2                                          |
| NM_020259                  | 0.007899 | -1.530                   | <b>Hhip</b>               | Hedgehog-interacting protein                                                           |
| NM_146249                  | 0.003839 | -1.530                   | <b>Zfp119b</b>            | zinc finger protein 119b                                                               |
| NM_001170669///NM_172263   | 0.007129 | -1.525                   | <b>Pde8b</b>              | phosphodiesterase 8B                                                                   |
| NM_001177806///NM_013719   | 0.000412 | -1.520                   | <b>Eif2ak4</b>            | eukaryotic translation initiation factor 2 alpha kinase 4                              |
| NM_001204165///NM_00120410 | 0.000734 | -1.518                   | <b>Rapgef4</b>            | Rap guanine nucleotide exchange factor (GEF) 4                                         |
| NM_001001130///NM_198322   | 0.001656 | -1.517                   | <b>Zfp273///Zfp85-rs1</b> | zinc finger protein 273///zinc finger protein 85, related sequence 1                   |
| NM_010680                  | 0.007166 | -1.514                   | <b>Lama3</b>              | laminin, alpha 3                                                                       |
| NM_001013580///NM_0010135  | 0.008025 | -1.512                   | <b>Pard3</b>              | par-3 (partitioning defective 3) homolog (C. elegans)                                  |
| NM_026825///NM_177807      | 0.009713 | -1.512                   | <b>Lrrc16a</b>            | leucine rich repeat containing 16A                                                     |
| NM_183312///NM_201639///N  | 0.000577 | -1.511                   | <b>Synm</b>               | synemin, intermediate filament protein                                                 |
| NM_172591                  | 0.004616 | -1.510                   | <b>Fcho2</b>              | FCH domain only 2                                                                      |
| NM_008760                  | 0.003158 | -1.509                   | <b>Ogn</b>                | osteoglycin                                                                            |
| NM_016693                  | 0.005024 | -1.509                   | <b>Map3k6</b>             | mitogen-activated protein kinase kinase kinase 6                                       |
| NM_178899                  | 0.001307 | -1.507                   | <b>Hepacam2</b>           | HEPACAM family member 2                                                                |
| NM_026856///XM_986833      | 0.001828 | -1.505                   | <b>Zfp644</b>             | zinc finger protein 644                                                                |
| NM_172771                  | 0.001995 | -1.504                   | <b>Dmxl2</b>              | Dmx-like 2                                                                             |

| RefSeq Transcript ID      | p        | *FC (SFN vs | Gene Symbol          | Gene Title                                                                                                   |
|---------------------------|----------|-------------|----------------------|--------------------------------------------------------------------------------------------------------------|
| NR_028300                 | 0.006963 | -1.504      | <b>5330426P16Rik</b> | RIKEN cDNA 5330426P16 gene                                                                                   |
| NM_145953                 | 0.006739 | -1.504      | <b>Cth</b>           | cystathionase (cystathionine gamma-lyase)                                                                    |
| NM_133753                 | 0.006808 | -1.504      | <b>Errfi1</b>        | ERBB receptor feedback inhibitor 1                                                                           |
| NM_009128                 | 0.008295 | -1.500      | <b>Scd2</b>          | stearoyl-Coenzyme A desaturase 2                                                                             |
| NM_029128                 | 0.001949 | -1.498      | <b>Qtrtd1</b>        | queuine tRNA-ribosyltransferase domain containing 1                                                          |
| NM_009517                 | 0.005902 | -1.496      | <b>Zmat3</b>         | zinc finger matrin type 3                                                                                    |
| NM_175480                 | 0.004184 | -1.496      | <b>Zfp612</b>        | zinc finger protein 612                                                                                      |
| NM_001164572///NM_133741/ | 0.005455 | -1.493      | <b>Snrk</b>          | SNF related kinase                                                                                           |
| NM_011545                 | 0.007500 | -1.491      | <b>Tcf21</b>         | transcription factor 21                                                                                      |
| NM_178633                 | 0.005603 | -1.490      | <b>Klhl2</b>         | kelch-like 2, Mayven                                                                                         |
| NM_001110327///NM_011806  | 0.004647 | -1.490      | <b>Dmtf1</b>         | cyclin D binding myb-like transcription factor 1                                                             |
| NM_199317                 | 0.003245 | -1.487      | <b>Phf16</b>         | PHD finger protein 16                                                                                        |
| NM_011107                 | 0.005905 | -1.487      | <b>Pla2g1b</b>       | phospholipase A2, group IB, pancreas                                                                         |
| NM_025811                 | 0.001981 | -1.485      | <b>Nhlrc2</b>        | NHL repeat containing 2                                                                                      |
| NM_054077                 | 0.001630 | -1.481      | <b>Prelp</b>         | proline arginine-rich end leucine-rich repeat                                                                |
| NM_016886                 | 0.008683 | -1.479      | <b>Gria3</b>         | glutamate receptor, ionotropic, AMPA3 (alpha 3)                                                              |
| NM_001122733///NM_021099  | 0.006665 | -1.479      | <b>Kit</b>           | kit oncogene                                                                                                 |
| NM_010423                 | 0.003290 | -1.479      | <b>Hey1</b>          | hairy/enhancer-of-split related with YRPW motif 1                                                            |
| NM_001114098///NM_172963  | 0.003211 | -1.478      | <b>Soga2</b>         | SOGA family member 2                                                                                         |
| NM_201372                 | 0.001593 | -1.478      | <b>Ccdc84</b>        | coiled-coil domain containing 84                                                                             |
| NM_009180                 | 0.001331 | -1.477      | <b>St6galnac2</b>    | ST6 (alpha-N-acetyl-neuraminy-2,3-beta-galactosyl-1,3)-N-acetylgalactosaminide alpha-2,6-sialyltransferase 2 |
| NM_001110100///NM_016812  | 0.006055 | -1.476      | <b>Banp</b>          | BTG3 associated nuclear protein                                                                              |
| NM_001168525///NM_0011685 | 0.002552 | -1.475      | <b>Sgms1</b>         | sphingomyelin synthase 1                                                                                     |
| NM_001190371              | 0.006082 | -1.473      | <b>Ankrd29</b>       | ankyrin repeat domain 29                                                                                     |
| NM_020260                 | 0.007640 | -1.473      | <b>Arhgap31</b>      | Rho GTPase activating protein 31                                                                             |
| NM_029949                 | 0.001670 | -1.473      | <b>Snopc3</b>        | small nuclear RNA activating complex, polypeptide 3                                                          |
| NM_021398                 | 0.001425 | -1.471      | <b>Slc43a3</b>       | solute carrier family 43, member 3                                                                           |
| NM_026917                 | 0.007471 | -1.470      | <b>Zdhhc3</b>        | zinc finger, DHHC domain containing 3                                                                        |
| NM_053072                 | 0.004910 | -1.470      | <b>Fgd6</b>          | FYVE, RhoGEF and PH domain containing 6                                                                      |
| NM_001002846///NM_013911  | 0.003377 | -1.469      | <b>Fbx12</b>         | F-box and leucine-rich repeat protein 12                                                                     |
| NM_207213                 | 0.001515 | -1.469      | <b>Snx25</b>         | sorting nexin 25                                                                                             |
| NM_001163073///NM_172153/ | 0.001528 | -1.469      | <b>Lcorl</b>         | ligand dependent nuclear receptor corepressor-like                                                           |
| NM_053132                 | 0.001701 | -1.469      | <b>Pcdhb7</b>        | protocadherin beta 7                                                                                         |
| NM_026382                 | 0.004359 | -1.466      | <b>Snrnp48</b>       | small nuclear ribonucleoprotein 48 (U11/U12)                                                                 |
| NM_001164493              | 0.001139 | -1.462      | <b>Klhl29</b>        | kelch-like 29                                                                                                |
| NM_022886                 | 0.002178 | -1.460      | <b>Scel</b>          | sciellin                                                                                                     |

| RefSeq Transcript ID      | p        | *FC (SFN vs Gene Symbol) | Gene Symbol      | Gene Title                                               |
|---------------------------|----------|--------------------------|------------------|----------------------------------------------------------|
| NM_001077364///NM_010286  | 0.004604 | -1.460                   | <b>Tsc22d3</b>   | TSC22 domain family, member 3                            |
| NM_010216                 | 0.001544 | -1.459                   | <b>Figf</b>      | c-fos induced growth factor                              |
| NM_023363                 | 0.007214 | -1.459                   | <b>Zfp788</b>    | zinc finger protein 788                                  |
| NM_001081034              | 0.003166 | -1.454                   | <b>Fbxo11</b>    | F-box protein 11                                         |
| NM_133725///NM_177608     | 0.002938 | -1.454                   | <b>Secisbp2l</b> | SECIS binding protein 2-like                             |
| NM_001045483///NM_027115  | 0.004468 | -1.454                   | <b>Mapk1ip1</b>  | mitogen-activated protein kinase 1 interacting protein 1 |
| NM_172530                 | 0.002694 | -1.454                   | <b>She</b>       | src homology 2 domain-containing transforming protein E  |
| NM_145589                 | 0.005671 | -1.452                   | <b>Prr14</b>     | proline rich 14                                          |
| NM_001161817///NM_010863  | 0.004967 | -1.451                   | <b>Myo1b</b>     | myosin IB                                                |
| NM_144551                 | 0.008711 | -1.449                   | <b>Trib2</b>     | tribbles homolog 2 (Drosophila)                          |
| NM_001081295              | 0.009547 | -1.449                   | <b>Arhgef26</b>  | Rho guanine nucleotide exchange factor (GEF) 26          |
| NM_001082414///NM_012059  | 0.008511 | -1.448                   | <b>Sh3d19</b>    | SH3 domain protein D19                                   |
| NM_010929                 | 0.002278 | -1.447                   | <b>Notch4</b>    | notch 4                                                  |
| NM_020518                 | 0.003985 | -1.447                   | <b>Vsig2</b>     | V-set and immunoglobulin domain containing 2             |
| NM_001122899///NM_010704/ | 0.009831 | -1.446                   | <b>Lepr</b>      | leptin receptor                                          |

**Table E2. Nrf2<sup>-/-</sup> mice: Air PBS vs SFN:**

Moderated T-Test (p-value cut-off:0.01)/Fold Change 1.45

\*Fold change (FC) in red incates increased and in blue decreased by SFN.

| RefSeq Transcript ID | p        | *FC (SFN vs PBS) | Gene Symbol          | Gene Title                                                        |
|----------------------|----------|------------------|----------------------|-------------------------------------------------------------------|
| NM_027150            | 0.007016 | 2.97             | <b>2310046A06Rik</b> | RIKEN cDNA 2310046A06 gene                                        |
| NM_021503            | 0.002281 | 2.66             | <b>Myoz2</b>         | myozenin 2                                                        |
|                      | 0.000275 | 2.33             | <b>9030411K21Rik</b> | RIKEN cDNA 9030411K21 gene                                        |
|                      | 0.002366 | 2.13             | <b>AI451250</b>      | expressed sequence AI451250                                       |
| NM_009626            | 0.002661 | 2.09             | <b>Adh7</b>          | alcohol dehydrogenase 7 (class IV), mu or sigma polypeptide       |
| NM_001177713///NM_   | 0.003699 | 2.08             | <b>Cyp26b1</b>       | cytochrome P450, family 26, subfamily b, polypeptide 1            |
| NM_008185            | 0.000468 | 1.87             | <b>Gstt1</b>         | glutathione S-transferase, theta 1                                |
| NM_053254            | 0.000104 | 1.77             | <b>Tle6</b>          | transducin-like enhancer of split 6, homolog of Drosophila E(spl) |
| NM_018808            | 0.004650 | 1.76             | <b>Dnajb1</b>        | DnaJ (Hsp40) homolog, subfamily B, member 1                       |
| NM_016808///NM_198   | 0.006660 | 1.66             | <b>Usp2</b>          | ubiquitin specific peptidase 2                                    |
| NM_181407            | 0.005373 | 1.64             | <b>Me3</b>           | malic enzyme 3, NADP(+)-dependent, mitochondrial                  |
|                      | 0.006271 | 1.63             | <b>AI120166</b>      | expressed sequence AI120166                                       |
| NM_175441            | 0.003228 | 1.62             | <b>Mylk3</b>         | myosin light chain kinase 3                                       |
| NM_001143776///NM_   | 0.000613 | 1.60             | <b>Fam13c</b>        | family with sequence similarity 13, member C                      |
| NM_027829            | 0.002368 | 1.58             | <b>Izumo4</b>        | IZUMO family member 4                                             |
| NM_001113478///NM_   | 0.000510 | 1.53             | <b>Frrs1</b>         | ferric-chelate reductase 1///Ferric-chelate reductase 1           |
| NM_011330            | 0.004814 | 1.52             | <b>Ccl11</b>         | chemokine (C-C motif) ligand 11                                   |
| NM_207677            | 0.003661 | 1.48             | <b>Dedd2</b>         | death effector domain-containing DNA binding protein 2            |
| NM_001159738///NM_   | 0.004642 | 1.46             | <b>Ccl20</b>         | chemokine (C-C motif) ligand 20                                   |
| NM_013794            | 0.001797 | -2.63            | <b>Klra16</b>        | killer cell lectin-like receptor, subfamily A, member 16          |
| NM_001080971         | 0.001696 | -2.42            | <b>Tubb1</b>         | tubulin, beta 1                                                   |
| NM_008981            | 0.000514 | -2.01            | <b>Ptprg</b>         | protein tyrosine phosphatase, receptor type, G                    |
| NM_201371            | 0.002041 | -1.98            | <b>Prmt8</b>         | protein arginine N-methyltransferase 8                            |
| NM_009704            | 0.009709 | -1.78            | <b>Areg</b>          | amphiregulin                                                      |
| NM_011198            | 0.003664 | -1.78            | <b>Ptgs2</b>         | prostaglandin-endoperoxide synthase 2                             |
| NM_025633            | 0.005264 | -1.76            | <b>Metap1d</b>       | methionyl aminopeptidase type 1D (mitochondrial)                  |
| NM_001099774         | 0.000677 | -1.75            | <b>Krtap17-1</b>     | keratin associated protein 17-1                                   |
| NM_023900            | 0.000638 | -1.73            | <b>Plekhl1</b>       | pleckstrin homology domain containing, family J member 1          |
| XM_001476669         | 0.001763 | -1.68            | <b>Gm3426</b>        | Predicted gene 3426                                               |
| NM_001081128         | 0.004736 | -1.63            | <b>Mtr</b>           | 5-methyltetrahydrofolate-homocysteine methyltransferase           |
| XR_105482///XR_1067C | 0.004751 | -1.62            | <b>LOC100503961</b>  | hypothetical LOC100503961                                         |



| RefSeq Transcript ID | <i>p</i> | *FC (SFN vs PBS) | Gene Symbol          | Gene Title                                                                                     |
|----------------------|----------|------------------|----------------------|------------------------------------------------------------------------------------------------|
| NM_029816            | 0.001113 | -1.60            | <b>2610028H24Rik</b> | RIKEN cDNA 2610028H24 gene                                                                     |
| NM_009789            | 0.003389 | -1.58            | <b>S100g</b>         | S100 calcium binding protein G                                                                 |
| NM_001042725///NM_   | 0.007480 | -1.55            | <b>Calcr</b>         | calcitonin receptor                                                                            |
| NM_001159986///NM_   | 0.000165 | -1.52            | <b>Sec16b</b>        | SEC16 homolog B ( <i>S. cerevisiae</i> )                                                       |
| NM_009616            | 0.000355 | -1.52            | <b>Adam19</b>        | a disintegrin and metallopeptidase domain 19 (meltrin beta)                                    |
| NM_012033            | 0.000080 | -1.51            | <b>Tinag</b>         | tubulointerstitial nephritis antigen                                                           |
| NM_001004150///NM_   | 0.008967 | -1.51            | <b>A4galt</b>        | alpha 1,4-galactosyltransferase                                                                |
| NM_001024139         | 0.001064 | -1.50            | <b>Adamts15</b>      | a disintegrin-like and metallopeptidase (reprolysin type) with thrombospondin type 1 motif, 15 |
| NM_023186            | 0.001372 | -1.48            | <b>Chia</b>          | chitinase, acidic                                                                              |
| NR_015549///NR_0279: | 0.003098 | -1.45            | <b>Trmt61b</b>       | tRNA methyltransferase 61 homolog B ( <i>S. cerevisiae</i> )                                   |

Table E3. Potential AREs in selected (n=193) sulforaphane-responsive lung genes  
Fold increase (F) by SFN over PBS-pretreatment in Nrf2+/- mice

| Gene symbol  | Gene title/Transcript Info/Chromosomal location/ChIP-seq                                                                                                                                                                                                                                               | RefSeq Transcript ID   | ARE_start(mm9) | ARE_end(mm9)                                                                                                        | ARE_seq                 | Orientation | PWM       | MS                     | Dist_TSS | Location             | FI (SFN vs PBS) |       |          |          |      |
|--------------|--------------------------------------------------------------------------------------------------------------------------------------------------------------------------------------------------------------------------------------------------------------------------------------------------------|------------------------|----------------|---------------------------------------------------------------------------------------------------------------------|-------------------------|-------------|-----------|------------------------|----------|----------------------|-----------------|-------|----------|----------|------|
| <i>Acaa2</i> | acetyl-Coenzyme A acyltransferase 2<br>(mitochondrial 3-oxoacyl-Coenzyme A thiolase)<br><br>NM_177470 chr18 74938865 74965861 +<br>chr18 E2 18 45.0 cM                                                                                                                                                 | NM_177470              | 74933855       | 74933875                                                                                                            | ACTATAGCTGGTATATAGAAA   | RC          | 7         | 0.778                  | -5010    | upstream             | 1.48            |       |          |          |      |
|              |                                                                                                                                                                                                                                                                                                        |                        | 74934402       | 74934422                                                                                                            | GGGTCTGCTATGTCCacctggcc | RC          | 10.8      | 0.89                   | -4463    | upstream             |                 |       |          |          |      |
|              |                                                                                                                                                                                                                                                                                                        |                        | 74935801       | 74935821                                                                                                            | CATATGGCTACGTGACAGTGT   | RC          | 7.5       | 0.777                  | -3064    | upstream             |                 |       |          |          |      |
|              |                                                                                                                                                                                                                                                                                                        |                        | 74937267       | 74937287                                                                                                            | TGAGACTGAAACTGCAGATAT   | FW          | 10.4      | 0.805                  | -1598    | upstream             |                 |       |          |          |      |
|              |                                                                                                                                                                                                                                                                                                        |                        | 74937571       | 74937591                                                                                                            | TAGATGTGAACACAGCAACAG   | FW          | 10.1      | 0.837                  | -1294    | upstream             |                 |       |          |          |      |
|              |                                                                                                                                                                                                                                                                                                        |                        | 74941636       | 74941656                                                                                                            | agtagtcagagtaattcttt    | RC          | 12.1      | 0.815                  | 2771     | intron1              |                 |       |          |          |      |
|              |                                                                                                                                                                                                                                                                                                        |                        | 66908259       | 66908279                                                                                                            | TATCATTACTTGGCAGTTAA    | FW          | 7         | 0.77                   | 1624     | <sup>1</sup> intron1 |                 |       |          |          |      |
| <i>Acaal</i> | acyl-Coenzyme A dehydrogenase, long-chain<br><br>NM_007381 chr1 66877412 66909883 -<br>chr1 C3 1 27.3 cM<br><br>1-Ch12 Mafk chr1:66908009-66909511<br>2-Ch12 Mafk chr1:66908009-66909511<br>3-Ch12 Mafk chr1:66908009-66909511 Ese14 Mafk chr1:66908411-66908772<br>4-Ch12 Mafk chr1:66908009-66909511 | NM_007381              | 66908377       | 66908397                                                                                                            | agggtctcaactaagcagctcc  | FW          | 6.5       | 0.8                    | 1506     | <sup>2</sup> intron1 | 1.75            |       |          |          |      |
|              |                                                                                                                                                                                                                                                                                                        |                        | 66908594       | 66908614                                                                                                            | ATAAATGCTGACTCAGACTGC   | RC          | 14.2      | 0.889                  | 1289     | <sup>3</sup> intron1 |                 |       |          |          |      |
|              |                                                                                                                                                                                                                                                                                                        |                        | 66908858       | 66908878                                                                                                            | CAGCAATGAGTCAGTGGCCT    | FW          | 8.9       | 0.834                  | 1025     | <sup>4</sup> intron1 |                 |       |          |          |      |
|              |                                                                                                                                                                                                                                                                                                        |                        | 66904942       | 66904962                                                                                                            | CGTGCCTGACACTGCATCGCG   | FW          | 8.9       | 0.85                   | 4941     | intron1              |                 |       |          |          |      |
|              |                                                                                                                                                                                                                                                                                                        |                        | 66905609       | 66905629                                                                                                            | CTAGCTGAGTATAGCAATCTG   | FW          | 9.7       | 0.849                  | 4274     | intron1              |                 |       |          |          |      |
|              |                                                                                                                                                                                                                                                                                                        |                        | 66906572       | 66906592                                                                                                            | ctgactggcttggcagcgcct   | RC          | 7.5       | 0.839                  | 3311     | intron1              |                 |       |          |          |      |
|              |                                                                                                                                                                                                                                                                                                        |                        | 66907399       | 66907419                                                                                                            | gctacattaccaagccattgt   | FW          | 7.3       | 0.763                  | 2484     | intron1              |                 |       |          |          |      |
|              |                                                                                                                                                                                                                                                                                                        |                        | 66911413       | 66911433                                                                                                            | ccacgatgacgaaggaaaggcc  | FW          | 9.1       | 0.79                   | -1530    | upstream             |                 |       |          |          |      |
|              |                                                                                                                                                                                                                                                                                                        |                        | 66912001       | 66912021                                                                                                            | gagatggctcagtgattaaaga  | RC          | 6.8       | 0.788                  | -2118    | upstream             |                 |       |          |          |      |
|              |                                                                                                                                                                                                                                                                                                        |                        | 66913162       | 66913182                                                                                                            | TCGGAATACGAAGCCAATAA    | FW          | 7.8       | 0.765                  | -3279    | upstream             |                 |       |          |          |      |
|              |                                                                                                                                                                                                                                                                                                        |                        | 66913395       | 66913415                                                                                                            | GTGGCTGCTGTGTACAAAGTG   | RC          | 11.6      | 0.902                  | -3512    | upstream             |                 |       |          |          |      |
|              |                                                                                                                                                                                                                                                                                                        |                        | 66913521       | 66913541                                                                                                            | CAACCCTGAGACAGCCACCAC   | FW          | 9.6       | 0.818                  | -3638    | upstream             |                 |       |          |          |      |
|              |                                                                                                                                                                                                                                                                                                        |                        | 66914038       | 66914058                                                                                                            | cacctgtcttagtcagagttt   | RC          | 8.5       | 0.784                  | -4155    | upstream             |                 |       |          |          |      |
|              |                                                                                                                                                                                                                                                                                                        |                        | 66914074       | 66914094                                                                                                            | acaccattgaccaaggaagtc   | FW          | 9.2       | 0.768                  | -4191    | upstream             |                 |       |          |          |      |
|              |                                                                                                                                                                                                                                                                                                        |                        | <i>Acadm</i>   | acyl-Coenzyme A dehydrogenase, medium chain<br><br>NM_007382 chr3 153585316 153607607 -<br>chr3 H3 3 73.6 cM        | NM_007382               | 153602802   | 153602822 | gccaggtgaggcagcacaacac | FW       | 7.4                  |                 | 0.828 | 4805     | intron2  | 1.66 |
|              |                                                                                                                                                                                                                                                                                                        |                        |                |                                                                                                                     |                         | 153605473   | 153605493 | TAAATGTCTCAGTCACTTCTCA | RC       | 17.4                 |                 | 0.946 | 2134     | intron1  |      |
|              |                                                                                                                                                                                                                                                                                                        |                        |                |                                                                                                                     |                         | 153607655   | 153607675 | GTCCTTTCAGGCTCAAGGGGT  | RC       | 6.5                  |                 | 0.787 | -48      | upstream |      |
| 153608556    | 153608576                                                                                                                                                                                                                                                                                              | CCTGTAGCATTTGTCAGGCACA |                |                                                                                                                     |                         | RC          | 6.9       | 0.805                  | -949     | upstream             |                 |       |          |          |      |
| 153608849    | 153608869                                                                                                                                                                                                                                                                                              | ctaacagctttgtgaccatta  |                |                                                                                                                     |                         | RC          | 8         | 0.773                  | -1242    | upstream             |                 |       |          |          |      |
| 153609051    | 153609071                                                                                                                                                                                                                                                                                              | gatattgctacttcattggaa  |                |                                                                                                                     |                         | RC          | 7.9       | 0.813                  | -1444    | upstream             |                 |       |          |          |      |
| 153610842    | 153610862                                                                                                                                                                                                                                                                                              | CTTTATGCTCAGTACTGAAA   |                |                                                                                                                     |                         | RC          | 7.4       | 0.812                  | -3235    | upstream             |                 |       |          |          |      |
| 153611754    | 153611774                                                                                                                                                                                                                                                                                              | GATCGAGCTGAGTGAGGAGC   |                |                                                                                                                     |                         | RC          | 7.1       | 0.805                  | -4147    | upstream             |                 |       |          |          |      |
| 153612478    | 153612498                                                                                                                                                                                                                                                                                              | GCAAGATGACTCTGACACAT   |                |                                                                                                                     |                         | FW          | 8.1       | 0.765                  | -4871    | upstream             |                 |       |          |          |      |
| <i>Acads</i> | acyl-Coenzyme A dehydrogenase, short chain<br><br>NM_007383 chr5 115560307 115569355 -<br>chr5 F 5 65.0 cM                                                                                                                                                                                             | NM_007383              |                |                                                                                                                     |                         | 115564724   | 115564744 | TGTTTGTGAACAGCCAAAAG   | FW       | 9                    | 0.809           | 4631  | intron2  | 1.41     |      |
|              |                                                                                                                                                                                                                                                                                                        |                        |                |                                                                                                                     |                         | 115565297   | 115565317 | tcagctgactttgaacttgg   | FW       | 9.9                  | 0.779           | 4058  | intron2  |          |      |
|              |                                                                                                                                                                                                                                                                                                        |                        | 115567550      | 115567570                                                                                                           | TCACAGTGAGGCTGTGCACCT   | FW          | 6.7       | 0.777                  | 1805     | intron2              |                 |       |          |          |      |
|              |                                                                                                                                                                                                                                                                                                        |                        | 115567632      | 115567652                                                                                                           | TTCTCGGCAAGTCAAGCGCAT   | RC          | 8.7       | 0.844                  | 1723     | exon2                |                 |       |          |          |      |
|              |                                                                                                                                                                                                                                                                                                        |                        | 115568532      | 115568552                                                                                                           | TTAATGTGACTCTGGATTAGC   | FW          | 8.6       | 0.789                  | 823      | intron1              |                 |       |          |          |      |
|              |                                                                                                                                                                                                                                                                                                        |                        | 115571613      | 115571633                                                                                                           | agggactgagcaagcagaggt   | FW          | 6.9       | 0.798                  | -2258    | upstream             |                 |       |          |          |      |
|              |                                                                                                                                                                                                                                                                                                        |                        | 115572042      | 115572062                                                                                                           | CTGCAATGACAATGCAAAAGCC  | FW          | 9.1       | 0.844                  | -2687    | upstream             |                 |       |          |          |      |
|              |                                                                                                                                                                                                                                                                                                        |                        | 115573415      | 115573435                                                                                                           | CCAGGATGACTGAGCACCCGG   | FW          | 14.6      | 0.936                  | -4060    | upstream             |                 |       |          |          |      |
|              |                                                                                                                                                                                                                                                                                                        |                        | <i>Acadv1</i>  | acyl-Coenzyme A dehydrogenase, very long chain<br><br>NM_017366 chr11 69823684 69828930 -<br>chr11 B2-B5 11 38.0 cM | NM_017366               | 69824037    | 69824057  | CAGCTATCACAGAGCAATTTTC | FW       | 8.2                  | 0.792           | 4893  | exon19   |          | 1.62 |
|              |                                                                                                                                                                                                                                                                                                        |                        |                |                                                                                                                     |                         | 69824335    | 69824355  | TGCAGAGCTCACTCACTGACA  | RC       | 6.4                  | 0.812           | 4595  | intron17 |          |      |
| 69824492     | 69824512                                                                                                                                                                                                                                                                                               | TTTAAAGCTCACTCAACAGTT  |                |                                                                                                                     |                         | RC          | 6.8       | 0.809                  | 4438     | intron16             |                 |       |          |          |      |
| 69826885     | 69826905                                                                                                                                                                                                                                                                                               | CCGTGAGCAGTGTCACTCC    |                |                                                                                                                     |                         | RC          | 9.1       | 0.841                  | 2045     | intron7              |                 |       |          |          |      |
| 69827859     | 69827879                                                                                                                                                                                                                                                                                               | TTCTTGGCAGGGTCAATCACT  |                |                                                                                                                     |                         | RC          | 7         | 0.818                  | 1071     | exon6                |                 |       |          |          |      |
| 69828108     | 69828128                                                                                                                                                                                                                                                                                               | AGTGACTGACTAAGCCTTTAC  |                |                                                                                                                     |                         | FW          | 10.3      | 0.88                   | 822      | intron4              |                 |       |          |          |      |
| 69829266     | 69829286                                                                                                                                                                                                                                                                                               | GAGGTGGCAGACTCAAGCTGG  |                |                                                                                                                     |                         | RC          | 8.1       | 0.805                  | -336     | upstream             |                 |       |          |          |      |
| 69830415     | 69830435                                                                                                                                                                                                                                                                                               | cagtgagccatgtcactgccc  |                |                                                                                                                     |                         | RC          | 7.6       | 0.815                  | -1485    | upstream             |                 |       |          |          |      |
| 69831448     | 69831468                                                                                                                                                                                                                                                                                               | TAGTACTGACTGAGGAGTTGG  |                |                                                                                                                     |                         | FW          | 8.8       | 0.796                  | -2518    | upstream             |                 |       |          |          |      |
| 69833083     | 69833103                                                                                                                                                                                                                                                                                               | GAGGCCTGATACAGCCTTACC  |                |                                                                                                                     |                         | FW          | 7.5       | 0.801                  | -4153    | upstream             |                 |       |          |          |      |
| <i>Acat1</i> | acetyl-Coenzyme A acetyltransferase 1<br><br>NM_144784 chr9 53388626 53418455 -<br>chr9 C-D 9 30.0 cM                                                                                                                                                                                                  | NM_144784              | 53413605       | 53413625                                                                                                            | tctccatgacacagggcaaca   | FW          | 10.3      | 0.785                  | 4850     | intron1              | 1.35            |       |          |          |      |
|              |                                                                                                                                                                                                                                                                                                        |                        | 53413979       | 53413999                                                                                                            | TGAAAAGCAGAGTCAGCCTTA   | RC          | 11.3      | 0.872                  | 4476     | intron1              |                 |       |          |          |      |
|              |                                                                                                                                                                                                                                                                                                        |                        | 53416146       | 53416166                                                                                                            | TCATGATGAAGAGGCAAAAAG   | FW          | 8.1       | 0.787                  | 2309     | intron1              |                 |       |          |          |      |
|              |                                                                                                                                                                                                                                                                                                        |                        | 53418110       | 53418130                                                                                                            | GATCGCCCTGTGTCAGGCCCA   | RC          | 7.3       | 0.804                  | 345      | intron1              |                 |       |          |          |      |
|              |                                                                                                                                                                                                                                                                                                        |                        | 53420794       | 53420814                                                                                                            | ATTTTGGCTAATTCAGCTGGA   | RC          | 8.8       | 0.816                  | -2339    | upstream             |                 |       |          |          |      |
|              |                                                                                                                                                                                                                                                                                                        |                        | 53420976       | 53420996                                                                                                            | tagctttgacctgagtgat     | FW          | 7.3       | 0.83                   | -2521    | upstream             |                 |       |          |          |      |
|              |                                                                                                                                                                                                                                                                                                        |                        | <i>Aco2</i>    | aconitase 2, mitochondrial<br><br>NM_080633 chr15 81702892 81745567 +<br>chr15 E1 15                                | NM_080633               | 81699053    | 81699073  | GAGGGATGAGAAAGCGATTAC  | FW       | 6.9                  |                 | 0.784 | -3839    | upstream | 1.74 |
| 81703523     | 81703543                                                                                                                                                                                                                                                                                               | AAGAGTGTCTTCTCACTTTTG  |                |                                                                                                                     |                         | RC          | 11.6      | 0.838                  | 631      | intron1              |                 |       |          |          |      |
| 81703695     | 81703715                                                                                                                                                                                                                                                                                               | GAGCAGTGACCCCTGCAGACCC |                |                                                                                                                     |                         | FW          | 9.8       | 0.859                  | 803      | intron1              |                 |       |          |          |      |
| 81703750     | 81703770                                                                                                                                                                                                                                                                                               | GAACCTTCTGAATCAGGGTGT  |                |                                                                                                                     |                         | RC          | 10.8      | 0.778                  | 858      | intron1              |                 |       |          |          |      |
| 81704162     | 81704182                                                                                                                                                                                                                                                                                               | CAAACTGCAAAATCAAACTCA  |                |                                                                                                                     |                         | RC          | 8.3       | 0.809                  | 1270     | intron1              |                 |       |          |          |      |
| 81705284     | 81705304                                                                                                                                                                                                                                                                                               | ttaaccactgagtcacggctc  |                |                                                                                                                     |                         | RC          | 11.7      | 0.812                  | 2392     | intron1              |                 |       |          |          |      |
| 81705601     | 81705621                                                                                                                                                                                                                                                                                               | tttagtctaagtaactgtga   |                |                                                                                                                     |                         | RC          | 15.5      | 0.86                   | 2709     | intron1              |                 |       |          |          |      |
| 81706642     | 81706662                                                                                                                                                                                                                                                                                               | ggagactgaaactgcatacagg |                |                                                                                                                     |                         | FW          | 7.5       | 0.792                  | 3750     | intron1              |                 |       |          |          |      |
| 81707698     | 81707718                                                                                                                                                                                                                                                                                               | TAGATTCTTATGCTATTTTC   |                |                                                                                                                     |                         | RC          | 8.9       | 0.811                  | 4806     | intron1              |                 |       |          |          |      |
| <i>Acsf2</i> | acyl-CoA synthetase family member 2<br><br>NM_153807 chr11 94418415 94463100 -<br>chr11 D 11                                                                                                                                                                                                           | NM_153807              |                |                                                                                                                     |                         | 94458756    | 94458776  | acgtcaatgactcagcgggatg | FW       | 15.3                 | 0.925           | 4344  | intron1  | 1.30     |      |
|              |                                                                                                                                                                                                                                                                                                        |                        | 94458920       | 94458940                                                                                                            | taaagctcaactgagcagataca | FW          | 8.4       | 0.816                  | 4180     | intron1              |                 |       |          |          |      |
|              |                                                                                                                                                                                                                                                                                                        |                        | 94461682       | 94461702                                                                                                            | TAGAGTGCTAATTCacataca   | RC          | 8.8       | 0.842                  | 1418     | intron1              |                 |       |          |          |      |
|              |                                                                                                                                                                                                                                                                                                        |                        | 94462413       | 94462433                                                                                                            | cagaagcagagtcagagcaaa   | RC          | 11.7      | 0.872                  | 687      | intron1              |                 |       |          |          |      |
|              |                                                                                                                                                                                                                                                                                                        |                        | 94464335       | 94464355                                                                                                            | TGGCCTTGAACCGGATGATG    | FW          | 7         | 0.786                  | -1235    | upstream             |                 |       |          |          |      |

| Gene symbol    | Gene title/Transcript Info/Chromosomal location/ChIP-seq                                                                                                                                       | RefSeq Transcript ID   | ARE_start(mm9) | ARE_end(mm9) | ARE_seq                 | Orientation | PWM      | MS    | Dist_TSS | Location              | FI (SFN vs PBS) |
|----------------|------------------------------------------------------------------------------------------------------------------------------------------------------------------------------------------------|------------------------|----------------|--------------|-------------------------|-------------|----------|-------|----------|-----------------------|-----------------|
|                |                                                                                                                                                                                                |                        | 94464657       | 94464677     | TTTCTGACTCAGAAATGGA     | FW          | 8.7      | 0.815 | -1557    | upstream              |                 |
|                |                                                                                                                                                                                                |                        | 94464832       | 94464852     | TCAACATGAAGTAGCTTTTT    | FW          | 8        | 0.802 | -1732    | upstream              |                 |
|                |                                                                                                                                                                                                |                        | 94465527       | 94465547     | aaagatgctgctcaaaaataa   | RC          | 8        | 0.834 | -2427    | upstream              |                 |
|                |                                                                                                                                                                                                |                        | 94466586       | 94466606     | GACTGTTGACTCGGAGTTTC    | FW          | 7.1      | 0.777 | -3486    | upstream              |                 |
|                |                                                                                                                                                                                                |                        | 47551763       | 47551783     | agacctgatatagctgctc     | FW          | 7.6      | 0.796 | -4627    | upstream              |                 |
|                |                                                                                                                                                                                                |                        | 47553488       | 47553508     | tgcaatgactgccccctta     | FW          | 6.9      | 0.832 | -2902    | upstream              |                 |
|                |                                                                                                                                                                                                |                        | 47553828       | 47553848     | TTCCAGTGACATGGCTAAATG   | FW          | 8.2      | 0.818 | -2562    | upstream              |                 |
|                |                                                                                                                                                                                                |                        | 47554389       | 47554409     | ttcattgctgctcaacta      | RC          | 14.5     | 0.916 | -2001    | upstream              |                 |
|                |                                                                                                                                                                                                |                        | 47554534       | 47554554     | cagcgtgATATGGCAGCTGT    | FW          | 6.6      | 0.768 | -1856    | upstream              |                 |
|                |                                                                                                                                                                                                |                        | 47554643       | 47554663     | CCTTGATGAGTCAGCTTGA     | FW          | 9        | 0.837 | -1747    | upstream              |                 |
| 47554947       | 47554967                                                                                                                                                                                       | tatacctgactcggccttca   | FW             | 9.7          | 0.857                   | -1443       | upstream |       |          |                       |                 |
| 47556072       | 47556092                                                                                                                                                                                       | GGAGAGCGGAGTCAGCAGGA   | RC             | 7.6          | 0.851                   | -318        | upstream |       |          |                       |                 |
| 47556808       | 47556828                                                                                                                                                                                       | TGCACCCGGAGTCAAGAGGT   | RC             | 7.1          | 0.853                   | 418         | intron1  |       |          |                       |                 |
| 47560238       | 47560258                                                                                                                                                                                       | CACCGTTGATTAGCAGAATG   | FW             | 10.2         | 0.846                   | 3848        | intron1  |       |          |                       |                 |
| 47560834       | 47560854                                                                                                                                                                                       | CTTGATTGATTACGATAGGT   | FW             | 7.1          | 0.844                   | 4444        | intron1  |       |          |                       |                 |
| 47561174       | 47561194                                                                                                                                                                                       | GGTATTGCCCAAGTACTCTGA  | RC             | 9.5          | 0.795                   | 4784        | intron1  |       |          |                       |                 |
| <b>Acs1l</b>   | acyl-CoA synthetase long-chain family member 1<br>NM_007981 chr8 47556390 47621405 +<br>chr8 8 B2                                                                                              | NM_007981              | 113874774      | 113874794    | GACTGACTGAGTAAGATGCC    | RC          | 7        | 0.798 | 3837     | intron5               | 1.66            |
|                |                                                                                                                                                                                                |                        | 113875188      | 113875208    | GCATATGCTGTGTCAGATAac   | RC          | 8.9      | 0.887 | 3423     | intron4               |                 |
|                |                                                                                                                                                                                                |                        | 113875251      | 113875271    | CAGTGGTGACAAAGGAGTACC   | FW          | 8.7      | 0.778 | 3360     | exon4                 |                 |
|                |                                                                                                                                                                                                |                        | 113875807      | 113875827    | AGAAGAGCTAACTCAACGGGT   | RC          | 7.3      | 0.817 | 2804     | intron3               |                 |
|                |                                                                                                                                                                                                |                        | 113875960      | 113875980    | TTCCACGCAAGTCAAGTGGT    | RC          | 7.8      | 0.84  | 2651     | intron3               |                 |
|                |                                                                                                                                                                                                |                        | 113876265      | 113876285    | GGTACTTCAGAGTCAGGATAC   | RC          | 7        | 0.778 | 2346     | exon3                 |                 |
|                |                                                                                                                                                                                                |                        | 113876487      | 113876507    | aggcatgcttgttcatgacctc  | RC          | 7.2      | 0.807 | 2124     | intron2               |                 |
|                |                                                                                                                                                                                                |                        | 113879088      | 113879108    | AGAGGAGCAGAGTCATAGGCA   | RC          | 10.3     | 0.865 | -477     | upstream              |                 |
|                |                                                                                                                                                                                                |                        | 113880436      | 113880456    | GAACCTGCTGTGCACCATTC    | RC          | 12.7     | 0.9   | -1825    | upstream              |                 |
|                |                                                                                                                                                                                                |                        | 113882909      | 113882929    | GGCACCTGACTGAGCTGCTGT   | FW          | 7.6      | 0.867 | -4298    | upstream              |                 |
| 113883005      | 113883025                                                                                                                                                                                      | GAGAAGTAACTGCACTTAA    | FW             | 8.3          | 0.813                   | -4394       | upstream |       |          |                       |                 |
| <b>Adhfe1</b>  | alcohol dehydrogenase, iron containing, 1<br>NR_027664 chr1 9538126 9568049 +<br>chr1 A2 1                                                                                                     | NM_175236<br>NR_027664 | 9533788        | 9533808      | CAAAGATGAATTTGCCATCAT   | FW          | 7        | 0.78  | -4338    | upstream              | 1.34            |
|                |                                                                                                                                                                                                |                        | 9534314        | 9534334      | AAATAATTACTTTGGATTCTA   | FW          | 8.3      | 0.783 | -3812    | upstream              |                 |
|                |                                                                                                                                                                                                |                        | 9536579        | 9536599      | CGGCCCGCGGTCAGGGAGA     | RC          | 7.3      | 0.827 | -1547    | upstream              |                 |
|                |                                                                                                                                                                                                |                        | 9540791        | 9540811      | GAGAAGCCAGAGTCAGAGGT    | RC          | 9        | 0.861 | 2665     | intron2               |                 |
|                |                                                                                                                                                                                                |                        | 158325695      | 158325715    | AGCTTCTGACCCAGCCTGTG    | FW          | 10       | 0.886 | -2652    | upstream              |                 |
| <b>Adig</b>    | adipogenin<br>NM_145635 chr2 158328347 158333934 +<br>chr2 H1 2                                                                                                                                | NM_145635              | 158325850      | 158325870    | TTCTCTGCTTATTCAAGCCTGG  | RC          | 12       | 0.862 | -2497    | upstream              | 3.43            |
|                |                                                                                                                                                                                                |                        | 158326462      | 158326482    | Tgataaatgataaagctttaa   | FW          | 7.8      | 0.798 | -1885    | upstream              |                 |
|                |                                                                                                                                                                                                |                        | 158326935      | 158326955    | atcttagcttgcctgatgttcc  | RC          | 6.4      | 0.787 | -1412    | upstream              |                 |
|                |                                                                                                                                                                                                |                        | 158326981      | 158327001    | tcagggtgaaeggaaattct    | FW          | 10.1     | 0.763 | -1366    | upstream              |                 |
|                |                                                                                                                                                                                                |                        | 158328218      | 158328238    | GTGACTCTGGGTCAAGCCAG    | RC          | 6.8      | 0.776 | -129     | upstream              |                 |
|                |                                                                                                                                                                                                |                        | 158328589      | 158328609    | TTTCTTACTTAGTCAAGGTGA   | RC          | 11.8     | 0.828 | 242      | exon1                 |                 |
|                |                                                                                                                                                                                                |                        | 158329521      | 158329541    | TAGGGCTGACTGGGCAACAGT   | FW          | 11.2     | 0.869 | 1174     | intron1               |                 |
|                |                                                                                                                                                                                                |                        | 158330453      | 158330473    | CTGTAGGCTCAATCAGTGTG    | RC          | 7        | 0.815 | 2106     | intron1               |                 |
|                |                                                                                                                                                                                                |                        | 158330625      | 158330645    | TTGTCTGTAACCTCAGCCTGC   | RC          | 11.2     | 0.858 | 2278     | intron1               |                 |
|                |                                                                                                                                                                                                |                        | 158332525      | 158332545    | cttccctcaacagctgttgg    | FW          | 8.4      | 0.786 | 4178     | intron2               |                 |
| 158332622      | 158332642                                                                                                                                                                                      | CCCCCTGACTCTGCCTACT    | FW             | 14.1         | 0.909                   | 4275        | intron2  |       |          |                       |                 |
| 158332977      | 158332997                                                                                                                                                                                      | CTCTGAGCTCTGCATCTCC    | RC             | 7.1          | 0.843                   | 4630        | intron2  |       |          |                       |                 |
| 158333299      | 158333319                                                                                                                                                                                      | AACCTTCTGGGTCATAGCT    | RC             | 8.3          | 0.788                   | 4952        | intron2  |       |          |                       |                 |
| <b>Adipoq</b>  | adiponectin, C1Q and collagen domain containing<br>NM_009605 chr16 23146608 23158041 +<br>chr16 B3-B4 16 16.0 cM<br>1-Ch12 Mafk chr16:23144184-23145174<br>2-Ch12 Mafk chr16:23144184-23145174 | NM_009605              | 23144752       | 23144772     | AGCCTATAACTAGAGCAGAGGT  | FW          | 8.4      | 0.813 | -1856    | <sup>1</sup> upstream | 8.73            |
|                |                                                                                                                                                                                                |                        | 23145147       | 23145167     | AGAGAGTGATACAGCTTTGAG   | FW          | 8.7      | 0.817 | -1461    | <sup>2</sup> upstream |                 |
|                |                                                                                                                                                                                                |                        | 23143248       | 23143268     | cattttaccagctcagaattgt  | RC          | 6.9      | 0.765 | -3360    | upstream              |                 |
|                |                                                                                                                                                                                                |                        | 23143764       | 23143784     | TGTGGATAACACAGCTTTTCT   | FW          | 7        | 0.776 | -2844    | upstream              |                 |
|                |                                                                                                                                                                                                |                        | 23144159       | 23144179     | TCTGTGGCTGCTCTCACTCTGG  | RC          | 8.9      | 0.819 | -2449    | upstream              |                 |
|                |                                                                                                                                                                                                |                        | 23146397       | 23146417     | AAACATGCTGAATTATTGFC    | RC          | 9.6      | 0.783 | -211     | upstream              |                 |
|                |                                                                                                                                                                                                |                        | 23147724       | 23147744     | ATTTGATCAGAGTCATTTCTGT  | RC          | 9        | 0.777 | 1116     | intron1               |                 |
|                |                                                                                                                                                                                                |                        | 23148783       | 23148803     | CCAAAGGCTGAGTGACACCTT   | RC          | 9        | 0.809 | 2175     | intron1               |                 |
|                |                                                                                                                                                                                                |                        | 23150428       | 23150448     | AGTCTTTCAAAGTCAGAGTGC   | RC          | 7.4      | 0.777 | 3820     | intron1               |                 |
|                |                                                                                                                                                                                                |                        | 23151227       | 23151247     | gcaagatgactcagtgagtaa   | FW          | 10.6     | 0.813 | 4619     | intron1               |                 |
| <b>Aldh1l2</b> | aldehyde dehydrogenase 1 family, member L2<br>NM_153543 chr10 82950191 82996885 -<br>chr10 C1 10                                                                                               | NM_153543              | 82992296       | 82992316     | GTGTGGTGACATAGCATGAAA   | FW          | 9.4      | 0.878 | 4589     | intron1               | 1.66            |
|                |                                                                                                                                                                                                |                        | 82992739       | 82992759     | TATCAGTGACTTAGTGTAA     | FW          | 8.8      | 0.782 | 4146     | intron1               |                 |
|                |                                                                                                                                                                                                |                        | 82992993       | 82993013     | gctgactgattcagctgtgct   | FW          | 7.7      | 0.829 | 3892     | intron1               |                 |
|                |                                                                                                                                                                                                |                        | 82993575       | 82993595     | GCCAAAGCTGAGTCACTGTGG   | RC          | 16       | 0.941 | 3310     | intron1               |                 |
|                |                                                                                                                                                                                                |                        | 82994136       | 82994156     | attactctctgctcacaacaaac | RC          | 7.2      | 0.787 | 2749     | intron1               |                 |
|                |                                                                                                                                                                                                |                        | 82994306       | 82994326     | cactggctgagttacttctgtt  | RC          | 7.5      | 0.799 | 2579     | intron1               |                 |
|                |                                                                                                                                                                                                |                        | 82995339       | 82995359     | TAACGTTTACAGAGCACTGTG   | FW          | 9.4      | 0.801 | 1546     | intron1               |                 |
|                |                                                                                                                                                                                                |                        | 82995784       | 82995804     | TGAGGGTTACACAGCAGAATG   | FW          | 14.8     | 0.839 | 1101     | intron1               |                 |
|                |                                                                                                                                                                                                |                        | 82995930       | 82995950     | CATATGGCAATGTCAGAGAAA   | RC          | 6.7      | 0.809 | 955      | intron1               |                 |
|                |                                                                                                                                                                                                |                        | 82996221       | 82996241     | TGCACGCTGGGTGATCCTGT    | RC          | 8.1      | 0.789 | 664      | intron1               |                 |
| 83001191       | 83001211                                                                                                                                                                                       | agatctgctcagtaaaacttcc | RC             | 7.7          | 0.813                   | -4306       | upstream |       |          |                       |                 |
| 83001852       | 83001872                                                                                                                                                                                       | acacatgacccaaggcagctc  | FW             | 8.1          | 0.764                   | -4967       | upstream |       |          |                       |                 |
| <b>Alox15</b>  | arachidonate 15-lipoxygenase<br>NM_009660 chr11 70157648 70165533 -                                                                                                                            | NM_009660              | 70161221       | 70161241     | TAACACTGACTCTGGAGAGGA   | FW          | 10.4     | 0.792 | 4312     | intron7               | 2.33            |
|                |                                                                                                                                                                                                |                        | 70162546       | 70162566     | ttaaatcaccacgcaaac      | FW          | 7.6      | 0.803 | 2987     | intron6               |                 |
|                |                                                                                                                                                                                                |                        | 70165083       | 70165103     | GGCAGCTGACACTGCTGATAC   | FW          | 6.7      | 0.817 | 450      | intron1               |                 |

| Gene symbol | Gene title/Transcript Info/Chromosomal location/ChIP-seq                                                                                                                                                   | RefSeq Transcript ID                                | ARE_start(mm9) | ARE_end(mm9)                                                                                                                                                                                      | ARE_seq                                             | Orientation | PWM       | MS                     | Dist_TSS | Location                | FI (SFN vs PBS) |       |                         |         |      |
|-------------|------------------------------------------------------------------------------------------------------------------------------------------------------------------------------------------------------------|-----------------------------------------------------|----------------|---------------------------------------------------------------------------------------------------------------------------------------------------------------------------------------------------|-----------------------------------------------------|-------------|-----------|------------------------|----------|-------------------------|-----------------|-------|-------------------------|---------|------|
|             | chr11 B3 11 40.0 cM                                                                                                                                                                                        |                                                     | 70165183       | 70165203                                                                                                                                                                                          | CAACTGTTACTGAGCGCTCAC                               | FW          | 9.2       | 0.805                  | 350      | intron1                 |                 |       |                         |         |      |
|             |                                                                                                                                                                                                            |                                                     | 70168346       | 70168366                                                                                                                                                                                          | CAGGGCTGAAGAGGCAAGACCG                              | FW          | 6.5       | 0.801                  | -2813    | upstream                |                 |       |                         |         |      |
|             |                                                                                                                                                                                                            |                                                     | 70168369       | 70168389                                                                                                                                                                                          | TGACCCCTGAGACCGCCATTGA                              | FW          | 8.7       | 0.781                  | -2836    | upstream                |                 |       |                         |         |      |
|             |                                                                                                                                                                                                            |                                                     | 70169423       | 70169443                                                                                                                                                                                          | agatcagcttagtgacagagca                              | RC          | 7.5       | 0.79                   | -3890    | upstream                |                 |       |                         |         |      |
|             |                                                                                                                                                                                                            |                                                     | 70170214       | 70170234                                                                                                                                                                                          | AAGTCATCATTCAGCAGAGTG                               | FW          | 7.7       | 0.764                  | -4681    | upstream                |                 |       |                         |         |      |
|             |                                                                                                                                                                                                            |                                                     | 70170296       | 70170316                                                                                                                                                                                          | TCACTCTGCACAAATGCTCATGT                             | FW          | 10.7      | 0.838                  | -4763    | upstream                |                 |       |                         |         |      |
| Aoc3        | amine oxidase, copper containing 3<br>NM_009675 chr11 101191919 101200744 + chr11 11 B2-B5                                                                                                                 | NM_009675                                           | 101187189      | 101187209                                                                                                                                                                                         | TGGGCATTACTATGACAGACTT                              | FW          | 10.8      | 0.787                  | -4730    | upstream                | 2.35            |       |                         |         |      |
|             |                                                                                                                                                                                                            |                                                     | 101189327      | 101189347                                                                                                                                                                                         | Tggccttgactttgcagctcat                              | FW          | 11.7      | 0.878                  | -2592    | upstream                |                 |       |                         |         |      |
|             |                                                                                                                                                                                                            |                                                     | 101192021      | 101192041                                                                                                                                                                                         | CAACCCCTGACCCAGAGAGCAC                              | FW          | 6.8       | 0.763                  | 102      | UTR5                    |                 |       |                         |         |      |
|             |                                                                                                                                                                                                            |                                                     | 101192249      | 101192269                                                                                                                                                                                         | AAGCAATGACCCAGAGAGCCA                               | FW          | 7.3       | 0.784                  | 330      | UTR5                    |                 |       |                         |         |      |
|             |                                                                                                                                                                                                            |                                                     | 101192471      | 101192491                                                                                                                                                                                         | GCTTCTGACCAAGCACCTGG                                | FW          | 9.9       | 0.877                  | 552      | exon1                   |                 |       |                         |         |      |
|             |                                                                                                                                                                                                            |                                                     | 101192660      | 101192680                                                                                                                                                                                         | CCAACCTGAGTGAAGCTGGTGG                              | FW          | 8.9       | 0.831                  | 741      | exon1                   |                 |       |                         |         |      |
|             |                                                                                                                                                                                                            |                                                     | 101193068      | 101193088                                                                                                                                                                                         | AGAGTCTCACTCAGCTGGAGG                               | FW          | 7         | 0.8                    | 1149     | exon1                   |                 |       |                         |         |      |
|             |                                                                                                                                                                                                            |                                                     | 101194576      | 101194596                                                                                                                                                                                         | Tggaatttactctgcagatca                               | FW          | 6.8       | 0.781                  | 2657     | intron1                 |                 |       |                         |         |      |
| Apol6       | apolipoprotein L 6<br>NM_001163621 chr15 76875504 76882781 + chr15 15 E1                                                                                                                                   | NM_001163621<br>NM_028010                           | 76870626       | 76870646                                                                                                                                                                                          | ATGTATGCATCTACACAGGGG                               | RC          | 9.2       | 0.816                  | -4878    | upstream                | 1.58            |       |                         |         |      |
|             |                                                                                                                                                                                                            |                                                     | 76870991       | 76871011                                                                                                                                                                                          | AGAAGTGCAGGGTCAAGATGC                               | RC          | 10.8      | 0.87                   | -4513    | upstream                |                 |       |                         |         |      |
|             |                                                                                                                                                                                                            |                                                     | 76871646       | 76871666                                                                                                                                                                                          | tcaacttgacacagctggagt                               | FW          | 12        | 0.892                  | -3858    | upstream                |                 |       |                         |         |      |
|             |                                                                                                                                                                                                            |                                                     | 76871968       | 76871988                                                                                                                                                                                          | cttgccttctggctcatgatgc                              | RC          | 8.4       | 0.784                  | -3536    | upstream                |                 |       |                         |         |      |
|             |                                                                                                                                                                                                            |                                                     | 76872003       | 76872023                                                                                                                                                                                          | aaacctgactaaagacaatt                                | FW          | 10.9      | 0.795                  | -3501    | upstream                |                 |       |                         |         |      |
|             |                                                                                                                                                                                                            |                                                     | 76873239       | 76873259                                                                                                                                                                                          | agatttgagctgagcctgat                                | FW          | 8.7       | 0.849                  | -2265    | upstream                |                 |       |                         |         |      |
|             |                                                                                                                                                                                                            |                                                     | 76873507       | 76873527                                                                                                                                                                                          | tcaacttgacacagctggagt                               | FW          | 12        | 0.892                  | -1997    | upstream                |                 |       |                         |         |      |
|             |                                                                                                                                                                                                            |                                                     | 76873812       | 76873832                                                                                                                                                                                          | cttgccttctggctcatgatgc                              | RC          | 8.5       | 0.784                  | -1692    | upstream                |                 |       |                         |         |      |
|             |                                                                                                                                                                                                            |                                                     | 76873847       | 76873867                                                                                                                                                                                          | aaacctgactaaagacacag                                | FW          | 8.9       | 0.785                  | -1657    | upstream                |                 |       |                         |         |      |
|             |                                                                                                                                                                                                            |                                                     | 76874867       | 76874887                                                                                                                                                                                          | gaatcattactctgacagctg                               | FW          | 10.4      | 0.806                  | -637     | upstream                |                 |       |                         |         |      |
|             |                                                                                                                                                                                                            |                                                     | 76875024       | 76875044                                                                                                                                                                                          | GCTGGGTAAACATAGCACATAC                              | FW          | 8.6       | 0.794                  | -480     | upstream                |                 |       |                         |         |      |
|             |                                                                                                                                                                                                            |                                                     | 76879760       | 76879780                                                                                                                                                                                          | TCAGAGTGACTTAGGTTCTGC                               | FW          | 9.1       | 0.792                  | 4055     | intron3                 |                 |       |                         |         |      |
|             |                                                                                                                                                                                                            |                                                     | 76879782       | 76879802                                                                                                                                                                                          | GCATcctgactagcatgtca                                | FW          | 6.4       | 0.811                  | 4077     | intron3                 |                 |       |                         |         |      |
|             |                                                                                                                                                                                                            |                                                     | Apol7a         | apolipoprotein L 7a//apolipoprotein L 7c//apolipoprotein L, 3-like<br>NM_001164640 chr15 77218646 77229540 - chr15 E1 15                                                                          | NM_001164640<br>NM_029419<br>NM_175391<br>NR_033577 | 77226334    | 77226354  | CCACTGTGACCTAGGACTGGG  | FW       | 9.6                     |                 | 0.793 | 3206                    | intron2 | 1.70 |
|             |                                                                                                                                                                                                            |                                                     |                |                                                                                                                                                                                                   |                                                     | 77226769    | 77226789  | CCCACAGCTTAGTGATTAGGG  | RC       | 6.7                     |                 | 0.786 | 2771                    | intron1 |      |
|             |                                                                                                                                                                                                            |                                                     |                |                                                                                                                                                                                                   |                                                     | 77226917    | 77226937  | agaattgccatgtaattggggc | RC       | 9.8                     |                 | 0.768 | 2623                    | intron1 |      |
| 77226989    | 77227009                                                                                                                                                                                                   | agaagaactctgctcactgttg                              |                |                                                                                                                                                                                                   |                                                     | RC          | 11.9      | 0.879                  | 2551     | intron1                 |                 |       |                         |         |      |
| 77227116    | 77227136                                                                                                                                                                                                   | AAGGACTGACTCTGCACACAA                               |                |                                                                                                                                                                                                   |                                                     | FW          | 11.7      | 0.886                  | 2424     | intron1                 |                 |       |                         |         |      |
| 77227678    | 77227698                                                                                                                                                                                                   | ccctaatgaccaagcatcaaa                               |                |                                                                                                                                                                                                   |                                                     | FW          | 10.5      | 0.883                  | 1862     | intron1                 |                 |       |                         |         |      |
| 77228521    | 77228541                                                                                                                                                                                                   | CAGTGGTGAAGTCAAGTCTAGA                              |                |                                                                                                                                                                                                   |                                                     | FW          | 7.7       | 0.787                  | 1019     | intron1                 |                 |       |                         |         |      |
| 77232289    | 77232309                                                                                                                                                                                                   | CCAGATGCAAAATTCATCTTA                               |                |                                                                                                                                                                                                   |                                                     | RC          | 7         | 0.795                  | -2749    | upstream                |                 |       |                         |         |      |
| 77232758    | 77232778                                                                                                                                                                                                   | AGACCTTGACTCAGAGTTTCA                               |                |                                                                                                                                                                                                   |                                                     | FW          | 8.6       | 0.802                  | -3218    | upstream                |                 |       |                         |         |      |
| 77233263    | 77233283                                                                                                                                                                                                   | AATGCCCTGGGTCAAGGGTT                                |                |                                                                                                                                                                                                   |                                                     | RC          | 8.9       | 0.772                  | -3723    | upstream                |                 |       |                         |         |      |
| Apol7c      | apolipoprotein L 7a//apolipoprotein L 7c//apolipoprotein L, 3-like<br>NM_001164640 chr15 77218646 77229540 - chr15 E1 15                                                                                   | NM_001164640<br>NM_029419<br>NM_175391<br>NR_033577 |                |                                                                                                                                                                                                   |                                                     | 77358872    | 77358892  | acacttgctgagctcaagctg  | RC       | 10.9                    | 0.84            | 4873  | intron4                 | 1.70    |      |
|             |                                                                                                                                                                                                            |                                                     |                |                                                                                                                                                                                                   |                                                     | 77361047    | 77361067  | CACTGGGCTCTGCTCACTGCTA | RC       | 11.2                    | 0.867           | 2698  | intron1                 |         |      |
|             |                                                                                                                                                                                                            |                                                     | 77362551       | 77362571                                                                                                                                                                                          | TGTTAGGCTCTGTCACATTGT                               | RC          | 9         | 0.869                  | 1194     | intron1                 |                 |       |                         |         |      |
|             |                                                                                                                                                                                                            |                                                     | 77362846       | 77362866                                                                                                                                                                                          | AGGAATTGACTTTGCACTCAG                               | FW          | 7.5       | 0.855                  | 899      | intron1                 |                 |       |                         |         |      |
|             |                                                                                                                                                                                                            |                                                     | 77366014       | 77366034                                                                                                                                                                                          | gTtttctgcttagtataat                                 | RC          | 8.8       | 0.821                  | -2269    | upstream                |                 |       |                         |         |      |
|             |                                                                                                                                                                                                            |                                                     | 77366232       | 77366252                                                                                                                                                                                          | aggctgsgacaagctggaaa                                | FW          | 9.6       | 0.86                   | -2487    | upstream                |                 |       |                         |         |      |
|             |                                                                                                                                                                                                            |                                                     | 77367701       | 77367721                                                                                                                                                                                          | gtgtgtctctgctcatggtgt                               | RC          | 7.8       | 0.762                  | -3956    | upstream                |                 |       |                         |         |      |
|             |                                                                                                                                                                                                            |                                                     | 77368065       | 77368085                                                                                                                                                                                          | tatgtatgaatcagctttagt                               | FW          | 9.6       | 0.837                  | -4320    | upstream                |                 |       |                         |         |      |
|             |                                                                                                                                                                                                            |                                                     | 77368337       | 77368357                                                                                                                                                                                          | tcatgggctcagtcagaccoca                              | RC          | 10.2      | 0.878                  | -4592    | upstream                |                 |       |                         |         |      |
|             |                                                                                                                                                                                                            |                                                     | Atp2a2         | ATPase, Ca++ transporting, cardiac muscle, slow twitch 2<br>NM_009722 chr5 122903521 122952234 - chr5 F 5 65.0 cM<br>1-Ch12 Mafk chr5:122948123-122948641<br>2-Ch12 Mafk chr5:122950857-122951357 | NM_001110140<br>NM_009722<br>NR_027838              | 122948256   | 122948276 | aaactagctgaaatcagcagc  | RC       | 10.3                    | 0.843           | 3978  | <sup>1</sup> intron3    |         | 2.07 |
| 122951205   | 122951225                                                                                                                                                                                                  | ATTTACAGCTGGGTCATCATT                               |                |                                                                                                                                                                                                   |                                                     | RC          | 10.5      | 0.869                  | 1029     | <sup>2</sup> intron1    |                 |       |                         |         |      |
| 122947886   | 122947906                                                                                                                                                                                                  | taaaaggctaaagtaaggcaag                              |                |                                                                                                                                                                                                   |                                                     | RC          | 6.5       | 0.779                  | 4348     | intron3                 |                 |       |                         |         |      |
| 122949084   | 122949104                                                                                                                                                                                                  | AGAAAATAACTTGGCACAATAT                              |                |                                                                                                                                                                                                   |                                                     | FW          | 7.9       | 0.779                  | 3150     | intron3                 |                 |       |                         |         |      |
| 122949121   | 122949141                                                                                                                                                                                                  | ACATGTTCACTTGGCACAATTT                              |                |                                                                                                                                                                                                   |                                                     | FW          | 7.6       | 0.782                  | 3113     | intron3                 |                 |       |                         |         |      |
| 122949472   | 122949492                                                                                                                                                                                                  | AGTAAATAACTCAGCAGTATG                               |                |                                                                                                                                                                                                   |                                                     | FW          | 10.6      | 0.836                  | 2762     | intron3                 |                 |       |                         |         |      |
| 122949773   | 122949793                                                                                                                                                                                                  | AGAACCCTGGGTCAAGACTTA                               |                |                                                                                                                                                                                                   |                                                     | RC          | 7.8       | 0.766                  | 2461     | intron3                 |                 |       |                         |         |      |
| 122950536   | 122950556                                                                                                                                                                                                  | GACCCCTGCAGTCAGGGGTC                                |                |                                                                                                                                                                                                   |                                                     | RC          | 8         | 0.859                  | 1698     | intron3                 |                 |       |                         |         |      |
| 122950787   | 122950807                                                                                                                                                                                                  | CAAAGTCTCAATCAACAGTT                                |                |                                                                                                                                                                                                   |                                                     | RC          | 9.4       | 0.844                  | 1447     | exon3                   |                 |       |                         |         |      |
| 122951868   | 122951888                                                                                                                                                                                                  | CGGGCCGCTGAATCACCCGAG                               |                |                                                                                                                                                                                                   |                                                     | RC          | 6.7       | 0.824                  | 366      | UTR3                    |                 |       |                         |         |      |
| 122953434   | 122953454                                                                                                                                                                                                  | TTGCATTGAATTTGCAATAT                                |                |                                                                                                                                                                                                   |                                                     | FW          | 6.8       | 0.796                  | -1200    | upstream                |                 |       |                         |         |      |
| Atp5c1      | ATP synthase, H+ transporting, mitochondrial F1 complex, gamma polypeptide 1<br>NM_001112738 chr2 9977658 10002137 - chr2 A1 2<br>1-Ch12 Mafk chr2:10004398-10004767<br>2-Ch12 Mafk chr2:10004398-10004767 | NM_001112738<br>NM_020615                           |                |                                                                                                                                                                                                   |                                                     | 10004579    | 10004599  | cagaccTGACCTGCAGTTTA   | FW       | 10.1                    | 0.855           | -2442 | <sup>1</sup> upstream   | 1.44    |      |
|             |                                                                                                                                                                                                            |                                                     | 10004711       | 10004731                                                                                                                                                                                          | AATATTGCTTTGTAACCTTTA                               | RC          | 13.6      | 0.821                  | -2574    | <sup>2</sup> upstream   |                 |       |                         |         |      |
|             |                                                                                                                                                                                                            |                                                     | 9997363        | 9997383                                                                                                                                                                                           | GACATGTGACACAGGAGCCAC                               | FW          | 6.5       | 0.781                  | 4774     | intron1                 |                 |       |                         |         |      |
|             |                                                                                                                                                                                                            |                                                     | 9999063        | 9999083                                                                                                                                                                                           | GTGAGATGACAGGGCCACAGTG                              | FW          | 6.7       | 0.83                   | 3074     | intron1                 |                 |       |                         |         |      |
|             |                                                                                                                                                                                                            |                                                     | 9999985        | 10000005                                                                                                                                                                                          | TGGAGTACTGAGTCAAAGGCC                               | RC          | 6.9       | 0.809                  | 2152     | intron1                 |                 |       |                         |         |      |
|             |                                                                                                                                                                                                            |                                                     | 10003587       | 10003607                                                                                                                                                                                          | gaacttgcctgagtaaccagga                              | RC          | 7         | 0.808                  | -1450    | upstream                |                 |       |                         |         |      |
|             |                                                                                                                                                                                                            |                                                     | 10005100       | 10005120                                                                                                                                                                                          | CCACCATGAGGGTGCAGTTCA                               | FW          | 7.8       | 0.791                  | -2963    | upstream                |                 |       |                         |         |      |
|             |                                                                                                                                                                                                            |                                                     | 10005944       | 10005964                                                                                                                                                                                          | gagttgccttggctcatggtgt                              | RC          | 9         | 0.768                  | -3807    | upstream                |                 |       |                         |         |      |
|             |                                                                                                                                                                                                            |                                                     | 10006941       | 10006961                                                                                                                                                                                          | tttctactgggtcaccagag                                | RC          | 6.4       | 0.776                  | -4804    | upstream                |                 |       |                         |         |      |
|             |                                                                                                                                                                                                            |                                                     | Atp5g1         | ATP synthase, H+ transporting, mitochondrial F0 complex, subunit c1 (subunit 9)<br>NM_001161419<br>NM_007506                                                                                      | NM_001161419<br>NM_007506                           | 95932445    | 95932465  | AGAAATGCAGAGTCAATGTCA  | RC       | 14.1                    | 0.912           | 4500  | <sup>1</sup> downstream |         | 1.83 |
| 95932515    | 95932535                                                                                                                                                                                                   | TCTTGATGAGTCAGCAGCTG                                |                |                                                                                                                                                                                                   |                                                     | FW          | 13.3      | 0.879                  | 4430     | <sup>2</sup> downstream |                 |       |                         |         |      |
| 95932806    | 95932826                                                                                                                                                                                                   | tcgtaactcactgagctatctc                              |                |                                                                                                                                                                                                   |                                                     | FW          | 7.2       | 0.79                   | 4139     | downstream              |                 |       |                         |         |      |

| Gene symbol   | Gene title/Transcript Info/Chromosomal location/ChIP-seq                                                                                                                                                 | RefSeq Transcript ID   | ARE_start(mm9) | ARE_end(mm9) | ARE_seq                  | Orientation | PWM      | MS    | Dist_TSS | Location             | FI (SFN vs PBS) |
|---------------|----------------------------------------------------------------------------------------------------------------------------------------------------------------------------------------------------------|------------------------|----------------|--------------|--------------------------|-------------|----------|-------|----------|----------------------|-----------------|
|               | NM_001161419 chr11:95934106-95936945 - chr11 D 11<br>1-Ch12 Mafk chr11:95932309-95932696 Mel Mafk chr11:95932010-95932712<br>2-Ch12 Mafk chr11:95932309-95932696 Mel Mafk chr11:95932010-95932712        |                        | 95933743       | 95933763     | GCAATGGCTGTGTGACACCTT    | RC          | 8.4      | 0.782 | 3202     | downstream           |                 |
|               |                                                                                                                                                                                                          |                        | 95934129       | 95934149     | TGAAAGTGACAAGACCAAC      | FW          | 13.7     | 0.905 | 2816     | UTR3                 |                 |
|               |                                                                                                                                                                                                          |                        | 95934202       | 95934222     | CACCTGCCTTATCACCAAGG     | RC          | 7        | 0.778 | 2743     | UTR3                 |                 |
|               |                                                                                                                                                                                                          |                        | 95938247       | 95938267     | cctctttgaccagcaatct      | FW          | 7.2      | 0.788 | -1239    | upstream             |                 |
|               |                                                                                                                                                                                                          |                        | 95940075       | 95940095     | latgltgtaagLaaccoccg     | RC          | 11.4     | 0.807 | -3067    | upstream             |                 |
|               |                                                                                                                                                                                                          |                        | 95940686       | 95940706     | tctaactgattcagcctccta    | FW          | 7.8      | 0.83  | -3678    | upstream             |                 |
| <b>Atp5k</b>  | <b>ATP synthase, H+ transporting, mitochondrial F1F0 complex, subunit e</b><br>NM_007507 chr5:108862271-108863397 - chr5 F 5 56.0 cM<br>1-Ch12 Nrf2 chr5:108863169-108863660                             | NM_007507              | 108863261      | 108863281    | GGCAATGCTAAGTCAAGGGAG    | RC          | 12.5     | 0.922 | 136      | <sup>1</sup> intron1 | 1.49            |
|               |                                                                                                                                                                                                          |                        | 108858418      | 108858438    | AAATGTCTtactcaacctga     | RC          | 11.2     | 0.766 | 4979     | downstream           |                 |
|               |                                                                                                                                                                                                          |                        | 108859529      | 108859549    | GATCAGTGAACAGCATGGTG     | FW          | 9.4      | 0.837 | 3868     | downstream           |                 |
|               |                                                                                                                                                                                                          |                        | 108859762      | 108859782    | TTAACCCCTAAGTCAATGCTG    | RC          | 7.1      | 0.771 | 3635     | downstream           |                 |
|               |                                                                                                                                                                                                          |                        | 108860323      | 108860343    | ACAGCTTCTGGGTCAATAGGAG   | RC          | 6.7      | 0.781 | 3074     | downstream           |                 |
|               |                                                                                                                                                                                                          |                        | 108862889      | 108862909    | GCTTCGTGAAAAGCCGACTC     | FW          | 7        | 0.793 | 508      | intron2              |                 |
|               |                                                                                                                                                                                                          |                        | 108862990      | 108863010    | GCAGTGTACACACAGCTTTCA    | FW          | 8.8      | 0.798 | 407      | intron2              |                 |
|               |                                                                                                                                                                                                          |                        | 108864835      | 108864855    | CCTCTGCCAACTCACTGCTC     | RC          | 8.5      | 0.805 | -1438    | upstream             |                 |
|               |                                                                                                                                                                                                          |                        | 108865568      | 108865588    | TAGGAGTTACCCAGCTATCAG    | FW          | 7.9      | 0.775 | -2171    | upstream             |                 |
|               |                                                                                                                                                                                                          |                        | 108865731      | 108865751    | CAGCCTGCAGGCTCACTCCCA    | RC          | 7.2      | 0.785 | -2334    | upstream             |                 |
|               |                                                                                                                                                                                                          |                        | 108865861      | 108865881    | CTGAGGGCCGTGTCAAGACTG    | RC          | 7.3      | 0.823 | -2464    | upstream             |                 |
|               |                                                                                                                                                                                                          |                        | 108865938      | 108865958    | TGCCCATGACCCAGCTACAGA    | FW          | 11.8     | 0.879 | -2541    | upstream             |                 |
|               |                                                                                                                                                                                                          |                        | 108866202      | 108866222    | aaaaCTGCACAAGCATACAT     | FW          | 12.3     | 0.895 | -2805    | upstream             |                 |
|               |                                                                                                                                                                                                          |                        | 108866439      | 108866459    | CTGAGCTCACTTCGAGTTGT     | FW          | 6.9      | 0.781 | -3042    | upstream             |                 |
|               |                                                                                                                                                                                                          |                        | 108867050      | 108867070    | AGGAGGTGAGTCTGCCTTTC     | FW          | 7.4      | 0.792 | -3653    | upstream             |                 |
| 108867544     | 108867564                                                                                                                                                                                                | AGTGGATGACACAGCCAGCCC  | FW             | 9.5          | 0.87                     | -4147       | upstream |       |          |                      |                 |
| <b>B4gal6</b> | <b>UDP-Gal:betaGlcNAc beta 1,4-galactosyltransferase, polypeptide 6</b><br>NM_019737 chr18:20843099-20904905 - chr18 A2 18<br>1-Ch12 Mafk chr18:20902921-20903933<br>2-Ch12 Mafk chr18:20902921-20903933 | NM_019737              | 20903064       | 20903084     | ACCAAGTCACTCAGCATTAAA    | FW          | 11.2     | 0.845 | 1841     | <sup>1</sup> intron1 | 1.47            |
|               |                                                                                                                                                                                                          |                        | 20903535       | 20903555     | TAAAGGTGACTAGTAAAACCT    | FW          | 9.3      | 0.776 | 1370     | <sup>2</sup> intron1 |                 |
|               |                                                                                                                                                                                                          |                        | 20900041       | 20900061     | AGGAAGTTACTCGGCCTCTC     | FW          | 9.4      | 0.796 | 4864     | intron1              |                 |
|               |                                                                                                                                                                                                          |                        | 20900387       | 20900407     | AATAGAGCTTCCTCATGGGGC    | RC          | 6.6      | 0.791 | 4518     | intron1              |                 |
|               |                                                                                                                                                                                                          |                        | 20906334       | 20906354     | ATGTATGCTAAGTGAGAATGA    | RC          | 9.1      | 0.823 | -1429    | upstream             |                 |
|               |                                                                                                                                                                                                          |                        | 20906369       | 20906389     | TTATGAGCTTAGTAAAATTA     | RC          | 6.6      | 0.786 | -1464    | upstream             |                 |
|               |                                                                                                                                                                                                          |                        | 20906825       | 20906845     | agactagctgaatcagggagc    | RC          | 9.4      | 0.84  | -1920    | upstream             |                 |
|               |                                                                                                                                                                                                          |                        | 20907242       | 20907262     | AATCTGCTGAGTAAAAGGA      | RC          | 11.7     | 0.843 | -2337    | upstream             |                 |
|               |                                                                                                                                                                                                          |                        | 20907675       | 20907695     | TTATCAGCCCAAGTCAACTCA    | RC          | 8.7      | 0.845 | -2770    | upstream             |                 |
|               |                                                                                                                                                                                                          |                        | 20907736       | 20907756     | GCTCCTTCACTCGGCGGGTA     | FW          | 6.7      | 0.79  | -2831    | upstream             |                 |
|               |                                                                                                                                                                                                          |                        | 20907843       | 20907863     | ATAGGGTCTGTGTCAAGGATTC   | RC          | 7.5      | 0.766 | -2938    | upstream             |                 |
|               |                                                                                                                                                                                                          |                        | 20908028       | 20908048     | CTACGTTCAATTCAGCAGATTG   | FW          | 7.1      | 0.77  | -3123    | upstream             |                 |
|               |                                                                                                                                                                                                          |                        | 73508166       | 73508186     | ctagggccttactcaactagcc   | RC          | 7.4      | 0.776 | 4171     | intron1              |                 |
|               |                                                                                                                                                                                                          |                        | 73508745       | 73508765     | TATTGATGAATCTCGAGTGT     | FW          | 10.4     | 0.826 | 3592     | intron1              |                 |
|               |                                                                                                                                                                                                          |                        | 73511558       | 73511578     | AGTGTGCTTGGTAAAAGTGC     | RC          | 7.4      | 0.794 | 779      | intron1              |                 |
| 73513326      | 73513346                                                                                                                                                                                                 | AATCTTCTATGTTACTAGCC   | RC             | 7.5          | 0.783                    | -989        | upstream |       |          |                      |                 |
| <b>Bckdha</b> | <b>branched chain ketoacid dehydrogenase E1, alpha polypeptide</b><br>NM_007533 chr7:26414870-26443780 - chr7 A3 7                                                                                       | NM_007533              | 26440729       | 26440749     | GGAGACTGAGCCAGCAGGAAA    | FW          | 8.9      | 0.83  | 3051     | intron1              | 1.26            |
|               |                                                                                                                                                                                                          |                        | 26441758       | 26441778     | aaccttgaaccagatgtgt      | FW          | 6.9      | 0.779 | 2022     | intron1              |                 |
|               |                                                                                                                                                                                                          |                        | 26442626       | 26442646     | gctcagtgactaagagcactg    | FW          | 8.4      | 0.786 | 1154     | intron1              |                 |
|               |                                                                                                                                                                                                          |                        | 26446521       | 26446541     | ttcatggcttgttcaagcctgc   | RC          | 7        | 0.791 | -2741    | upstream             |                 |
|               |                                                                                                                                                                                                          |                        | 26446937       | 26446957     | tagatagcatggtcagggcca    | RC          | 7.8      | 0.81  | -3157    | upstream             |                 |
|               |                                                                                                                                                                                                          |                        | 26447403       | 26447423     | ACGTTAGCAAGTCAACAGAG     | RC          | 6.6      | 0.831 | -3623    | upstream             |                 |
| <b>Bckdhb</b> | <b>branched chain ketoacid dehydrogenase E1, beta polypeptide</b><br>NM_199195 chr9:83842387-84017847 + chr9 E2 9                                                                                        | NM_199195              | 83837499       | 83837519     | cagtcgcagactcattcatt     | RC          | 7.2      | 0.789 | -4888    | upstream             | 1.38            |
|               |                                                                                                                                                                                                          |                        | 83838892       | 83838912     | aggaatgatctcgcatttt      | FW          | 7.5      | 0.79  | -3495    | upstream             |                 |
|               |                                                                                                                                                                                                          |                        | 83840185       | 83840205     | ccttccgctgagtttaagccct   | RC          | 8.5      | 0.805 | -2202    | upstream             |                 |
|               |                                                                                                                                                                                                          |                        | 83841057       | 83841077     | gggaaatgatttgcagataa     | FW          | 7        | 0.794 | -1330    | upstream             |                 |
|               |                                                                                                                                                                                                          |                        | 83842269       | 83842289     | gacaaataactcagcagggat    | FW          | 8.7      | 0.825 | -118     | upstream             |                 |
|               |                                                                                                                                                                                                          |                        | 83843577       | 83843597     | GTGTGCTGACACAGAACATA     | FW          | 6.7      | 0.778 | 1190     | intron1              |                 |
|               |                                                                                                                                                                                                          |                        | 83844120       | 83844140     | tcaacttgacacagccttaggg   | FW          | 11.6     | 0.891 | 1733     | intron1              |                 |
|               |                                                                                                                                                                                                          |                        | 83845241       | 83845261     | AAAGCTTCAAAGTCATGCATA    | RC          | 8.2      | 0.762 | 2854     | intron1              |                 |
|               |                                                                                                                                                                                                          |                        | 83846894       | 83846914     | tcctatgaaggtcaggattg     | RC          | 7.2      | 0.836 | 4507     | intron2              |                 |
|               |                                                                                                                                                                                                          |                        | 31418125       | 31418145     | ccaccatgatcctgctccac     | FW          | 6.4      | 0.774 | -4257    | upstream             |                 |
|               |                                                                                                                                                                                                          |                        | 31418207       | 31418227     | TGTGAAGCTGTGTACCAAGG     | RC          | 9.6      | 0.877 | -4175    | upstream             |                 |
| 31418502      | 31418522                                                                                                                                                                                                 | gaggcagctcagtcagtgagc  | RC             | 8.5          | 0.879                    | -3880       | upstream |       |          |                      |                 |
| 31422314      | 31422334                                                                                                                                                                                                 | AAACAGTAAACAAGCTGAAC   | FW             | 7.5          | 0.773                    | -68         | upstream |       |          |                      |                 |
| 31423716      | 31423736                                                                                                                                                                                                 | tagtgatcgcctcagcatgc   | RC             | 7            | 0.812                    | 1334        | intron1  |       |          |                      |                 |
| 31424311      | 31424331                                                                                                                                                                                                 | ACTTTCTGAACAGCAGTAA    | FW             | 8.3          | 0.829                    | 1929        | intron1  |       |          |                      |                 |
| 31425116      | 31425136                                                                                                                                                                                                 | agcctggctggttcaattgagc | RC             | 6.4          | 0.801                    | 2734        | intron1  |       |          |                      |                 |
| 31427075      | 31427095                                                                                                                                                                                                 | TAGACTTAACTCAGCACTGCC  | FW             | 8.3          | 0.826                    | -1763       | upstream |       |          |                      |                 |
| 31427726      | 31427746                                                                                                                                                                                                 | ACTGGTGACACAGTATACTG   | FW             | 9.3          | 0.8                      | -1112       | upstream |       |          |                      |                 |
| 31430003      | 31430023                                                                                                                                                                                                 | TCTACTGCGAGCTCAGGCAGC  | RC             | 6.4          | 0.822                    | 1165        | intron1  |       |          |                      |                 |
| 31430222      | 31430242                                                                                                                                                                                                 | GCAGGTGCAGAGTCACTGTCT  | RC             | 15.3         | 0.917                    | 1384        | intron1  |       |          |                      |                 |
| 31430295      | 31430315                                                                                                                                                                                                 | ATTTTGTGACGACGAGATGC   | FW             | 8.9          | 0.889                    | 1457        | intron1  |       |          |                      |                 |
| 31431911      | 31431931                                                                                                                                                                                                 | GGGTGACCTAAGTCATCGAGG  | RC             | 6.5          | 0.774                    | 3073        | intron1  |       |          |                      |                 |
| 31432868      | 31432888                                                                                                                                                                                                 | TACTCCTGACACTGCAGATGT  | FW             | 12.5         | 0.866                    | 4030        | intron1  |       |          |                      |                 |
| <b>Calml3</b> | <b>calmodulin-like 3</b><br>NM_027416 chr13:3802138-3803564 -                                                                                                                                            | NM_027416              | 3801317        | 3801337      | gtagcttgcgtgataaactcctga | RC          | 9.8      | 0.762 | 2247     | downstream           | 7.61            |
|               |                                                                                                                                                                                                          |                        | 3803107        | 3803127      | CCCCAGCTTGTGTCACAGT      | RC          | 7.5      | 0.847 | 457      | exon1                |                 |
|               |                                                                                                                                                                                                          |                        | 3803140        | 3803160      | CTGCACAGCAAGCCATTGC      | FW          | 7.9      | 0.846 | 424      | exon1                |                 |

| Gene symbol  | Gene title/Transcript Info/Chromosomal location/ChIP-seq                                    | RefSeq Transcript ID   | ARE_start(mm9) | ARE_end(mm9) | ARE_seq                 | Orientation | PWM      | MS    | Dist_TSS | Location   | FI (SFN vs PBS) |
|--------------|---------------------------------------------------------------------------------------------|------------------------|----------------|--------------|-------------------------|-------------|----------|-------|----------|------------|-----------------|
|              | chr13 A1 13                                                                                 |                        | 3803335        | 3803355      | ACCGCATGACAGTGGCCCAATT  | FW          | 9.8      | 0.827 | 229      | exon1      |                 |
|              |                                                                                             |                        | 3803422        | 3803442      | TTTGTCTCCTCAGTCAAGTGGT  | RC          | 6.8      | 0.79  | 142      | exon1      |                 |
|              |                                                                                             |                        | 3805799        | 3805819      | ACATATGCATTTTCACATTTA   | RC          | 8        | 0.787 | -2235    | upstream   |                 |
|              |                                                                                             |                        | 3807107        | 3807127      | tttgttctgcttcaataaactt  | RC          | 7        | 0.819 | -3543    | upstream   |                 |
|              |                                                                                             |                        | 14636938       | 14636958     | CATCTCTGTATCACTGCACAGAT | FW          | 6.6      | 0.783 | -4788    | upstream   |                 |
| <i>Car13</i> | carbonic anhydrase 13<br>NM_024495 chr3 14641726 14663002 +<br>chr3 3 A2                    | NM_024495              | 14637151       | 14637171     | gcaggctgaaacaagccatgga  | FW          | 7        | 0.791 | -4575    | upstream   | 1.55            |
|              |                                                                                             |                        | 14637433       | 14637453     | TATATAGCTAGTAACCTAGT    | RC          | 10.8     | 0.822 | -4293    | upstream   |                 |
|              |                                                                                             |                        | 14639731       | 14639751     | gagacagctatatacagggtcc  | RC          | 7.5      | 0.795 | -1995    | upstream   |                 |
|              |                                                                                             |                        | 14641210       | 14641230     | CTTCTGCACAGTCAAGATGG    | RC          | 10.6     | 0.879 | -516     | upstream   |                 |
|              |                                                                                             |                        | 14642073       | 14642093     | CAGATCACTAAGTCACGGGAC   | RC          | 7.5      | 0.779 | 347      | intron1    |                 |
|              |                                                                                             |                        | 14643357       | 14643377     | GGGAAGTACCAAGCATTTTT    | FW          | 10.6     | 0.877 | 1631     | intron1    |                 |
|              |                                                                                             |                        | 14645410       | 14645430     | AAGTATGCTGGGTGATATTTT   | RC          | 7.7      | 0.803 | 3684     | intron2    |                 |
|              |                                                                                             |                        | 14859285       | 14859305     | ACAAGATGACTTTGCAGAGAT   | FW          | 13.1     | 0.893 | -4252    | upstream   |                 |
|              |                                                                                             |                        | 14859401       | 14859421     | caacagttacatagcaacacagc | FW          | 9.9      | 0.8   | -4136    | upstream   |                 |
|              |                                                                                             |                        | 14860880       | 14860900     | TCAAGTGCATTTGCAAGGG     | FW          | 10.2     | 0.854 | -2657    | upstream   |                 |
| 14861874     | 14861894                                                                                    | ACTACAGCTTACTACTCAACA  | RC             | 8.8          | 0.817                   | -1663       | upstream |       |          |            |                 |
| 14862740     | 14862760                                                                                    | ACTGCTGTGACTGAGGCTAG   | RC             | 7.6          | 0.767                   | -797        | upstream |       |          |            |                 |
| 14863110     | 14863130                                                                                    | TTAGTTGCTAAGTAACACCAG  | RC             | 8.9          | 0.814                   | -427        | upstream |       |          |            |                 |
| 14863810     | 14863830                                                                                    | GAGAAGTCACTCAGCCAGAG   | FW             | 7.8          | 0.801                   | 273         | intron1  |       |          |            |                 |
| 14864459     | 14864479                                                                                    | CCTTCGGCAGGGTCACTGAG   | RC             | 6.7          | 0.819                   | 922         | intron2  |       |          |            |                 |
| 14864858     | 14864878                                                                                    | GAAAAGCCAGGCTCACTGTGT  | RC             | 12.4         | 0.862                   | 1321        | intron2  |       |          |            |                 |
| 14865615     | 14865635                                                                                    | AACACATGAATAGCATTTTT   | FW             | 9.7          | 0.822                   | 2078        | intron2  |       |          |            |                 |
| 14866575     | 14866595                                                                                    | TTAAGATGACAGGCGATGCCA  | FW             | 8.1          | 0.845                   | 3038        | intron2  |       |          |            |                 |
| 14867047     | 14867067                                                                                    | AAATATGCTAGGTCAGAGAGA  | RC             | 11.9         | 0.89                    | 3510        | intron3  |       |          |            |                 |
| 14868197     | 14868217                                                                                    | AGTATTGCTTATTAATATTTA  | RC             | 8.9          | 0.764                   | 4660        | intron3  |       |          |            |                 |
| 14868252     | 14868272                                                                                    | CAACCGTGAGACTGCACACCT  | FW             | 11.2         | 0.818                   | 4715        | intron3  |       |          |            |                 |
| <i>Car5b</i> | carbonic anhydrase 5b, mitochondrial<br>NM_181315 chrX 160414753 160465942 -<br>chrX F5 X   | NM_181315              | 160463868      | 160463888    | GAGCCATTACAAGCTAGACA    | FW          | 7        | 0.763 | 2074     | intron1    | 1.46            |
|              |                                                                                             |                        | 160464310      | 160464330    | CAGAGAGCTGTATCAATGTGC   | RC          | 8.6      | 0.822 | 1632     | intron1    |                 |
|              |                                                                                             |                        | 160465704      | 160465724    | GACCAAGCCTAGTCAGGCCCG   | RC          | 7.3      | 0.831 | 238      | intron1    |                 |
|              |                                                                                             |                        | 160467057      | 160467077    | TGGTTGTGACTCAGTGCCTCG   | FW          | 9.1      | 0.797 | -1115    | upstream   |                 |
|              |                                                                                             |                        | 160469436      | 160469456    | ctgattgcaaaatccaataga   | RC          | 7.4      | 0.805 | -3494    | upstream   |                 |
| 160469789    | 160469809                                                                                   | taagaaagagcctgcaattga  | FW             | 10.8         | 0.808                   | -3847       | upstream |       |          |            |                 |
| <i>Car6</i>  | carbonic anhydrase 6<br>NM_009802 chr4 149561124 149575244 -<br>chr4 E2 4                   | NM_009802              | 149570751      | 149570771    | ACGCAATGACACAGATTCACT   | FW          | 7.1      | 0.77  | 4493     | intron3    | 1.37            |
|              |                                                                                             |                        | 149571244      | 149571264    | agatgtgacagaggaagaca    | FW          | 6.4      | 0.774 | 4000     | intron3    |                 |
|              |                                                                                             |                        | 149571372      | 149571392    | AGAAAGTGACTCTGGAGCGTG   | FW          | 8.7      | 0.786 | 3872     | intron3    |                 |
|              |                                                                                             |                        | 149573992      | 149574012    | TAGCTTTGAATGAGCACACAG   | FW          | 7.2      | 0.833 | 1252     | intron1    |                 |
|              |                                                                                             |                        | 149574703      | 149574723    | GGAGTCTGACTGAGCATCTGA   | FW          | 11.4     | 0.914 | 541      | intron1    |                 |
|              |                                                                                             |                        | 149575100      | 149575120    | AGGGCTGCTTTGTCACTCTGT   | RC          | 13.9     | 0.912 | 144      | intron1    |                 |
|              |                                                                                             |                        | 149576837      | 149576857    | ggagttgagacAGcacacac    | FW          | 8.4      | 0.834 | -1593    | upstream   |                 |
|              |                                                                                             |                        | 149577014      | 149577034    | CAGAGGTCACAAGCACTTCC    | FW          | 8        | 0.789 | -1770    | upstream   |                 |
|              |                                                                                             |                        | 149578630      | 149578650    | AGTAAAGCAAGTCAATTTTG    | RC          | 7        | 0.83  | -3386    | upstream   |                 |
|              |                                                                                             |                        | 149579931      | 149579951    | atgcatgctgggtcagatctc   | RC          | 8.4      | 0.88  | -4687    | upstream   |                 |
|              |                                                                                             |                        | 149580008      | 149580028    | ATGCTGCTCTGTCACTCGCT    | RC          | 11.3     | 0.886 | -4764    | upstream   |                 |
|              |                                                                                             |                        | 101885838      | 101885858    | ACCTGTGCTGGGTAAAGCCATG  | RC          | 8        | 0.791 | -4539    | upstream   |                 |
|              |                                                                                             |                        | 101886561      | 101886581    | AGGACTGCTTATGTCACACACA  | RC          | 13.5     | 0.923 | -3816    | upstream   |                 |
|              |                                                                                             |                        | 101888185      | 101888205    | AAATATGCATGTCACTACACA   | RC          | 9.5      | 0.844 | -2192    | upstream   |                 |
| 101889518    | 101889538                                                                                   | ggtcctccagagtcagccagc  | RC             | 6.9          | 0.772                   | -859        | upstream |       |          |            |                 |
| 101889821    | 101889841                                                                                   | CTGTATGCTGGGTCAAGTAGGA | RC             | 11.3         | 0.897                   | -556        | upstream |       |          |            |                 |
| 101890823    | 101890843                                                                                   | CCTGTATGAGAGAGCATTAGT  | FW             | 9            | 0.824                   | 446         | intron1  |       |          |            |                 |
| 101893703    | 101893723                                                                                   | TCAGTTGCTAGGTGATGGTCT  | RC             | 8.9          | 0.796                   | 3326        | intron1  |       |          |            |                 |
| 101895098    | 101895118                                                                                   | tctctttctgctgctatggttg | RC             | 10.4         | 0.806                   | 4721        | intron1  |       |          |            |                 |
| <i>Cfd</i>   | complement factor D (adipsin)<br>NM_013459 chr10 79353597 79355405 +<br>chr10 C1 10 43.0 cM | NM_013459              | 79350241       | 79350261     | AACTGTGCTCTGTGACTTCTT   | RC          | 6.6      | 0.78  | -3356    | upstream   | 6.10            |
|              |                                                                                             |                        | 79350766       | 79350786     | TGTGCTGAGTGTTCAGATTG    | FW          | 8.2      | 0.797 | -2831    | upstream   |                 |
|              |                                                                                             |                        | 79350974       | 79350994     | ATGCTGCTGCTCAGGATGT     | RC          | 9.6      | 0.84  | -2623    | upstream   |                 |
|              |                                                                                             |                        | 79353641       | 79353661     | GAGCCTCTGGGTCACTGCTCT   | RC          | 11.4     | 0.895 | 44       | UTR5       |                 |
|              |                                                                                             |                        | 79353746       | 79353766     | CCAGTTTGACACACAGCCGCC   | FW          | 11.6     | 0.913 | 149      | intron1    |                 |
|              |                                                                                             |                        | 79354007       | 79354027     | CCTACTGCAGGTTCACTGTGG   | RC          | 11.3     | 0.819 | 410      | intron1    |                 |
|              |                                                                                             |                        | 79354688       | 79354708     | TTTTCTTGACTCTGCCCTAC    | FW          | 6.5      | 0.843 | 1091     | intron3    |                 |
|              |                                                                                             |                        | 79357129       | 79357149     | CCCAGAGCTGGGTCACTGTGG   | RC          | 13.6     | 0.9   | 3532     | downstream |                 |
|              |                                                                                             |                        | 79358094       | 79358114     | GTTCCCACTGTGTCAACAGCG   | RC          | 8.7      | 0.778 | 4497     | downstream |                 |
|              |                                                                                             |                        | 79358136       | 79358156     | GCATGGTGACACAGCCACACC   | FW          | 13.2     | 0.9   | 4539     | downstream |                 |
|              |                                                                                             |                        | 79358498       | 79358518     | CACAGTGCCTGTCAAGCAGG    | RC          | 9.7      | 0.847 | 4901     | downstream |                 |
|              |                                                                                             |                        | 89259360       | 89259380     | TCTTACTGACTGAGAAATCTT   | FW          | 7.6      | 0.797 | 998      | intron2    |                 |
|              |                                                                                             |                        | 89260468       | 89260488     | ACAGCTCTGTGTGAGACACT    | RC          | 7        | 0.792 | -110     | upstream   |                 |
|              |                                                                                             |                        | 89262033       | 89262053     | TGGCTTGTATCTGTCTATCTG   | FW          | 7.4      | 0.793 | -1675    | upstream   |                 |
|              |                                                                                             |                        | 89263156       | 89263176     | caaatctctgtgtcagagagta  | RC          | 8.9      | 0.767 | -2798    | upstream   |                 |
| 89264077     | 89264097                                                                                    | TGAGAGTGAAGTATAGCTGCC  | FW             | 7.5          | 0.82                    | -3719       | upstream |       |          |            |                 |
| <i>Chrne</i> | cholinergic receptor, nicotinic, epsilon polypeptide<br>NM_009603 chr11 70428384 70432696 - | NM_009603              | 70428463       | 70428483     | GCCAGTGCAGGCTCATGGTGT   | RC          | 10.2     | 0.809 | 4233     | UTR3       | 1.43            |
|              |                                                                                             |                        | 70428831       | 70428851     | GCAAGCGCTAGGTCATTAATA   | RC          | 7.3      | 0.843 | 3865     | intron10   |                 |
|              |                                                                                             |                        | 70430858       | 70430878     | CATAGGCACAGTCAGCCCGC    | RC          | 9.8      | 0.847 | 1838     | intron6    |                 |



| Gene symbol   | Gene title/Transcript Info/Chromosomal location/ChIP-seq                                                                                                                                                                        | RefSeq Transcript ID     | ARE_start(mm9) | ARE_end(mm9) | ARE_seq                 | Orientation | PWM  | MS    | Dist_TSS | Location              | FI (SFN vs PBS) |
|---------------|---------------------------------------------------------------------------------------------------------------------------------------------------------------------------------------------------------------------------------|--------------------------|----------------|--------------|-------------------------|-------------|------|-------|----------|-----------------------|-----------------|
|               | chr11 B3 11 42.0 cM                                                                                                                                                                                                             |                          | 70431112       | 70431132     | AAAGCTGCCGTGCAATGTCA    | RC          | 13.2 | 0.882 | 1584     | exon6                 |                 |
|               |                                                                                                                                                                                                                                 |                          | 70431658       | 70431678     | GAAAAATGAGAGGAGGTTCT    | FW          | 9.1  | 0.826 | 1038     | exon5                 |                 |
|               |                                                                                                                                                                                                                                 |                          | 70435076       | 70435096     | aaacctgacttggaaaaaaa    | FW          | 9.0  | 0.772 | -2380    | upstream              |                 |
| <i>Cidea</i>  | cell death-inducing DNA fragmentation factor, alpha subunit-like effector A<br>NM_007702 chr18 67503217 67527448 +<br>chr18 E1 18<br>1-Ch12 Mafk chr18:67506370-67506589                                                        | NM_007702                | 67506489       | 67506509     | tcagctgctgagtcactctctg  | RC          | 15.2 | 0.94  | 3272     | <sup>1</sup> intron1  | 6.88            |
|               |                                                                                                                                                                                                                                 |                          | 67506523       | 67506543     | AGATCCTGAACAGCCTGTGTG   | FW          | 8.2  | 0.809 | 3306     | intron1               |                 |
|               |                                                                                                                                                                                                                                 |                          | 67500156       | 67500176     | tcttaactcaactgacccatctc | FW          | 6.8  | 0.788 | -3061    | upstream              |                 |
|               |                                                                                                                                                                                                                                 |                          | 67501257       | 67501277     | ATGACTTCTGAGTCAAGGGGCG  | RC          | 11   | 0.832 | -1960    | upstream              |                 |
|               |                                                                                                                                                                                                                                 |                          | 67504424       | 67504444     | TGGCTTTCAGAGTCAAGGCCA   | RC          | 6.4  | 0.771 | 1207     | intron1               |                 |
|               |                                                                                                                                                                                                                                 |                          | 67504460       | 67504480     | GCGACTTACAAGCAGGTTA     | FW          | 7.8  | 0.789 | 1243     | intron1               |                 |
|               |                                                                                                                                                                                                                                 |                          | 67505285       | 67505305     | CGGAAGTGACTCAGTAAATCA   | FW          | 10.6 | 0.824 | 2068     | intron1               |                 |
| <i>Clybl</i>  | citrate lyase beta like<br>NM_029556 chr14 122580915 122801456 +<br>chr14 E5 14<br>1-Ch12 Mafk chr14:122583173-122583506 Mel Mafk chr14:122582649-122583625 Mel Mafk chr14:122583053-12<br>2-Ch12 Mafk chr18:67506370-67506589  | NM_029556                | 122583206      | 122583226    | ttttgttgactgtgcagaagt   | FW          | 6.8  | 0.851 | 2291     | <sup>1</sup> intron1  | 1.76            |
|               |                                                                                                                                                                                                                                 |                          | 122583356      | 122583376    | TACTCTGCTGACTCATCGTCT   | RC          | 15   | 0.892 | 2441     | <sup>2</sup> intron1  |                 |
|               |                                                                                                                                                                                                                                 |                          | 122576038      | 122576058    | TACAAATGACCCGTCAAGG     | FW          | 6.4  | 0.816 | -4877    | upstream              |                 |
|               |                                                                                                                                                                                                                                 |                          | 122577658      | 122577678    | TCATTTTACTAGGCACCTCA    | FW          | 6.5  | 0.779 | -3257    | upstream              |                 |
|               |                                                                                                                                                                                                                                 |                          | 122577682      | 122577702    | tcacctgattcttcccaatcca  | FW          | 9.7  | 0.831 | -3233    | upstream              |                 |
|               |                                                                                                                                                                                                                                 |                          | 122577986      | 122578006    | cccatgtgaccagaaataatc   | FW          | 7.8  | 0.79  | -2929    | upstream              |                 |
|               |                                                                                                                                                                                                                                 |                          | 122578030      | 122578050    | acatatgctgagtGACACAAAT  | RC          | 8.9  | 0.83  | -2885    | upstream              |                 |
| <i>Coq3</i>   | coenzyme Q3 homolog, methyltransferase (yeast)<br>NM_172687 chr4 21806821 21839273 +<br>chr4 A3 4 16.6 cM<br>1-Ch12 Mafk chr4:21806070-21807519                                                                                 | NM_172687                | 21807349       | 21807369     | CCTAGCGCTGCTCACTACTT    | RC          | 7.1  | 0.799 | 528      | <sup>1</sup> intron1  | 1.37            |
|               |                                                                                                                                                                                                                                 |                          | 21804813       | 21804833     | acttttgtaatgagcagccag   | FW          | 6.7  | 0.836 | -2008    | upstream              |                 |
|               |                                                                                                                                                                                                                                 |                          | 21805132       | 21805152     | ggatctcactgagccatttc    | FW          | 6.5  | 0.778 | -1689    | upstream              |                 |
|               |                                                                                                                                                                                                                                 |                          | 21805489       | 21805509     | TATTTCTGACACAGCTCAACT   | FW          | 8.9  | 0.864 | -1332    | upstream              |                 |
|               |                                                                                                                                                                                                                                 |                          | 21805807       | 21805827     | TGACAGTGATAGAGCAGCTGG   | FW          | 10.6 | 0.835 | -1014    | upstream              |                 |
|               |                                                                                                                                                                                                                                 |                          | 21805868       | 21805888     | ATGAGAGCTTAGTAAATTTCC   | RC          | 7.1  | 0.787 | -953     | upstream              |                 |
|               |                                                                                                                                                                                                                                 |                          | 21810055       | 21810075     | aagtggtcagtcagttacag    | RC          | 7.5  | 0.866 | 3234     | intron1               |                 |
| <i>Coq7</i>   | demethyl-Q 7<br>NM_009940 chr7 125668575 125676870 -<br>chr7 F2 7 53.5 cM                                                                                                                                                       | NM_009940                | 125673072      | 125673092    | CCTGAATGACAGGCCAACAC    | FW          | 6.9  | 0.813 | 3798     | exon2                 | 1.32            |
|               |                                                                                                                                                                                                                                 |                          | 125673252      | 125673272    | CTGCAATGAAAAGCAAGTGT    | FW          | 9.5  | 0.822 | 3618     | intron1               |                 |
|               |                                                                                                                                                                                                                                 |                          | 125673370      | 125673390    | ttaccacctgagtcataatcgc  | RC          | 7.9  | 0.794 | 3500     | intron1               |                 |
|               |                                                                                                                                                                                                                                 |                          | 125674104      | 125674124    | TCTTTGGCTCTTTCATCAAGA   | RC          | 6.8  | 0.789 | 2766     | intron1               |                 |
|               |                                                                                                                                                                                                                                 |                          | 125674371      | 125674391    | FTGCTCCTCACTCAGCTCAGTG  | FW          | 8.7  | 0.807 | 2499     | intron1               |                 |
|               |                                                                                                                                                                                                                                 |                          | 125675116      | 125675136    | ccagctgaggttggcagagct   | FW          | 10.9 | 0.826 | 1754     | intron1               |                 |
|               |                                                                                                                                                                                                                                 |                          | 125675154      | 125675174    | tcctggtgacaacaagatc     | FW          | 8.4  | 0.816 | 1716     | intron1               |                 |
|               |                                                                                                                                                                                                                                 |                          | 125676202      | 125676222    | ctagtgcagattcaaacctcc   | RC          | 6.6  | 0.807 | 668      | intron1               |                 |
|               |                                                                                                                                                                                                                                 |                          | 125677927      | 125677947    | tcacaagtgcacccagcctctc  | FW          | 13.9 | 0.916 | -1057    | upstream              |                 |
|               |                                                                                                                                                                                                                                 |                          | 125678386      | 125678406    | caacttgcctgtctcatccaag  | RC          | 16.1 | 0.927 | -1516    | upstream              |                 |
|               |                                                                                                                                                                                                                                 |                          | 125678633      | 125678653    | tcacagtcacacagcaaaGAG   | FW          | 13.9 | 0.843 | -1763    | upstream              |                 |
|               |                                                                                                                                                                                                                                 |                          | 125679211      | 125679231    | GTGACTGCATAGTTACTGGAA   | RC          | 6.6  | 0.773 | -2341    | upstream              |                 |
|               |                                                                                                                                                                                                                                 |                          | 125680058      | 125680078    | AAAATGTTACAAAGCACATGT   | FW          | 10.5 | 0.805 | -3188    | upstream              |                 |
|               |                                                                                                                                                                                                                                 |                          | 125680277      | 125680297    | cacatCTGACAAAGCACCCCT   | FW          | 9.5  | 0.874 | -3407    | upstream              |                 |
|               |                                                                                                                                                                                                                                 |                          | 125680860      | 125680880    | FTGAAATCACTCTGCACTCTT   | FW          | 10   | 0.803 | -3990    | upstream              |                 |
|               |                                                                                                                                                                                                                                 |                          | 125681131      | 125681151    | TGATACTGACTGGGCTAGGGT   | FW          | 9.3  | 0.867 | -4261    | upstream              |                 |
|               |                                                                                                                                                                                                                                 |                          | 125681807      | 125681827    | CTGCTCTGACTCAGGTAAGG    | FW          | 7.2  | 0.785 | -4937    | upstream              |                 |
| <i>Coq9</i>   | coenzyme Q9 homolog (yeast)<br>NM_026452 chr8 97362316 97378795 +<br>chr8 C5-D1 8<br>1-Ch12 Mafk chr8:97357816-97358529 Ese14 Mafk chr8:97357726-97358544 Mel Mafk chr8:97357683-97358394<br>2-Ch12 Nrf2 chr8:97362100-97362908 | NM_026452                | 97358099       | 97358119     | CTACCTGACTCAGCAAAAG     | FW          | 17.4 | 0.959 | -4217    | <sup>1</sup> upstream | 1.62            |
|               |                                                                                                                                                                                                                                 |                          | 97362779       | 97362799     | ACCACGTCACTAAGCTGGTGA   | FW          | 6.6  | 0.788 | 463      | <sup>2</sup> intron1  |                 |
|               |                                                                                                                                                                                                                                 |                          | 97358821       | 97358841     | TAAGACTGACTAAGaatcccca  | FW          | 7.6  | 0.8   | -3495    | upstream              |                 |
|               |                                                                                                                                                                                                                                 |                          | 97358972       | 97358992     | AAAGACTGACTAAGAACCCCT   | FW          | 8.4  | 0.802 | -3344    | upstream              |                 |
|               |                                                                                                                                                                                                                                 |                          | 97359768       | 97359788     | TAACCTGCTTCGTCAAATGGC   | RC          | 7    | 0.868 | -2548    | upstream              |                 |
|               |                                                                                                                                                                                                                                 |                          | 97360502       | 97360522     | GAGCTGTGACTCAGGGCTGTT   | FW          | 11   | 0.808 | -1814    | upstream              |                 |
|               |                                                                                                                                                                                                                                 |                          | 97360641       | 97360661     | Accgggtgaaatgcatattgc   | FW          | 9.8  | 0.817 | -1675    | upstream              |                 |
|               |                                                                                                                                                                                                                                 |                          | 97360717       | 97360737     | gggtctgctaagtaccagca    | RC          | 7.6  | 0.807 | -1599    | upstream              |                 |
|               |                                                                                                                                                                                                                                 |                          | 97360856       | 97360876     | TGGGGTGACTCAGTGTAGC     | FW          | 11.3 | 0.806 | -1460    | upstream              |                 |
|               |                                                                                                                                                                                                                                 |                          | 97365639       | 97365659     | agacctgaccacaaggaagga   | FW          | 7.2  | 0.774 | 3323     | intron1               |                 |
| <i>Corin</i>  | corin<br>NM_016869 chr5 72891263 72895447 -<br>chr5 C3.2 5<br>1-Ch12 Mafk chr5:72891894-72892206 Ese14 Mafk chr5:72891924-72892206                                                                                              | NM_01122756<br>NM_016869 | 72892055       | 72892075     | tcgagatgactcagcaagaaa   | FW          | 17.2 | 0.955 | 3392     | <sup>1</sup> intron1  | 7.76            |
|               |                                                                                                                                                                                                                                 |                          | 72890480       | 72890500     | CCCACCTCTGAGTCAAGCCAGG  | RC          | 11.2 | 0.827 | 4967     | intron1               |                 |
|               |                                                                                                                                                                                                                                 |                          | 72891485       | 72891505     | CAGTTTGCCCAAGTATGATGT   | RC          | 8.6  | 0.79  | 3962     | intron1               |                 |
|               |                                                                                                                                                                                                                                 |                          | 72893610       | 72893630     | AATATGGCAGACTCAGGGGCGC  | RC          | 10   | 0.802 | 1837     | intron1               |                 |
|               |                                                                                                                                                                                                                                 |                          | 72894251       | 72894271     | GAACCTGAAACAGCAAGCAG    | FW          | 11.3 | 0.849 | 1196     | intron1               |                 |
|               |                                                                                                                                                                                                                                 |                          | 72895534       | 72895554     | AAAGTTGACTCTGAAGTCAAC   | FW          | 7.4  | 0.779 | -87      | upstream              |                 |
|               |                                                                                                                                                                                                                                 |                          | 72897229       | 72897249     | TAAACCTGAAATAGCTAAGTA   | FW          | 6.8  | 0.789 | -1450    | upstream              |                 |
|               |                                                                                                                                                                                                                                 |                          | 72898628       | 72898648     | ggggctgcatagtaagactgt   | RC          | 6.6  | 0.777 | -2849    | upstream              |                 |
|               |                                                                                                                                                                                                                                 |                          | 72898730       | 72898750     | AATATTTCTGAGTCAACCTCC   | RC          | 14.5 | 0.849 | -2951    | upstream              |                 |
|               |                                                                                                                                                                                                                                 |                          | 72899107       | 72899127     | tctatatgaccagcagaag     | FW          | 9    | 0.832 | -3328    | upstream              |                 |
|               |                                                                                                                                                                                                                                 |                          | 72899428       | 72899448     | acagttttacaagaaccaggtt  | FW          | 6.5  | 0.768 | -3649    | upstream              |                 |
|               |                                                                                                                                                                                                                                 |                          | 72900001       | 72900021     | tactggcagtgctattggca    | RC          | 10.8 | 0.842 | -4222    | upstream              |                 |
| <i>Cox4i1</i> | cytochrome c oxidase subunit IV isoform 1<br>NM_009941 chr8 123192124 123198109 +<br>chr8 E1 8 64.0 cM                                                                                                                          | NM_009941                | 123191848      | 123191868    | AGGCTCGCTAGTCAGCTTCA    | RC          | 8.8  | 0.867 | -276     | <sup>1</sup> upstream | 1.30            |
|               |                                                                                                                                                                                                                                 |                          | 123190573      | 123190593    | AAATGTGCCCAAGTAAACGTGC  | RC          | 9.5  | 0.794 | -1551    | upstream              |                 |
|               |                                                                                                                                                                                                                                 |                          | 123191170      | 123191190    | CAAACCCAGAGTATGAATTC    | RC          | 6.8  | 0.766 | -954     | upstream              |                 |
|               |                                                                                                                                                                                                                                 |                          | 123194804      | 123194824    | GAAGGGTGACTGAGGCGCTGGC  | FW          | 8    | 0.783 | 2680     | intron2               |                 |
|               |                                                                                                                                                                                                                                 |                          | 123196127      | 123196147    | CTGCCGTGACTCTGCTTGTTC   | FW          | 7.3  | 0.796 | 4003     | intron2               |                 |

| Gene symbol | Gene title/Transcript Info/Chromosomal location/ChIP-seq                                                                                                                               | RefSeq Transcript ID   | ARE_start(mm9) | ARE_end(mm9)                                                                                                | ARE_seq                 | Orientation | PWM       | MS                      | Dist_TSS | Location             | FI (SFN vs PBS) |       |            |          |      |
|-------------|----------------------------------------------------------------------------------------------------------------------------------------------------------------------------------------|------------------------|----------------|-------------------------------------------------------------------------------------------------------------|-------------------------|-------------|-----------|-------------------------|----------|----------------------|-----------------|-------|------------|----------|------|
| Cox5a       | 1-Ch12 Nrf2 chr8:123191829-123192308<br><br>cytochrome c oxidase, subunit Va<br><br>NM_007747 chr9 57369038 57380233 + chr9 B 9<br><br>1-Ch12 Mafk chr9:57369628-57369793              | NM_007747              | 57369667       | 57369687                                                                                                    | TAGCCCTGATCAGGCAATTCT   | FW          | 7.7       | 0.774                   | 629      | <sup>1</sup> intron1 | 1.49            |       |            |          |      |
|             |                                                                                                                                                                                        |                        | 57365016       | 57365036                                                                                                    | caagcagccttgctcatggaag  | RC          | 7         | 0.813                   | -4022    | upstream             |                 |       |            |          |      |
|             |                                                                                                                                                                                        |                        | 57366579       | 57366599                                                                                                    | gagagatgacttagtgcctct   | FW          | 9.4       | 0.878                   | -2459    | upstream             |                 |       |            |          |      |
|             |                                                                                                                                                                                        |                        | 57367656       | 57367676                                                                                                    | agctggtgagcagcctctctt   | FW          | 6.4       | 0.793                   | -1382    | upstream             |                 |       |            |          |      |
|             |                                                                                                                                                                                        |                        | 57368031       | 57368051                                                                                                    | ctctgatgaccaaagcattcaa  | FW          | 8.4       | 0.87                    | -1007    | upstream             |                 |       |            |          |      |
|             |                                                                                                                                                                                        |                        | 57369947       | 57369967                                                                                                    | TTCACTGCTGACTTATGAAGT   | RC          | 7.8       | 0.77                    | 909      | intron1              |                 |       |            |          |      |
|             |                                                                                                                                                                                        |                        | 57370473       | 57370493                                                                                                    | TAAAAAATACTTAGCCAGGTA   | FW          | 7.4       | 0.791                   | 1435     | intron1              |                 |       |            |          |      |
|             |                                                                                                                                                                                        |                        | 57371811       | 57371831                                                                                                    | TCTTTAGCTGTGTGACCTTGT   | RC          | 9.2       | 0.797                   | 2773     | intron1              |                 |       |            |          |      |
|             |                                                                                                                                                                                        |                        | 57372558       | 57372578                                                                                                    | ttcattgctactcatagctg    | RC          | 7.2       | 0.809                   | 3520     | intron1              |                 |       |            |          |      |
|             |                                                                                                                                                                                        |                        | 57373574       | 57373594                                                                                                    | tatagattcggatcattatgc   | RC          | 11        | 0.816                   | 4536     | intron1              |                 |       |            |          |      |
|             |                                                                                                                                                                                        |                        | 57373819       | 57373839                                                                                                    | aaaagttcagggtcattctga   | RC          | 10.7      | 0.775                   | 4781     | intron1              |                 |       |            |          |      |
|             |                                                                                                                                                                                        |                        | Cox5b          | cytochrome c oxidase, subunit Vb<br><br>NM_009942 chr1 36748331 36750233 + chr1 B 1                         | NM_009942               | 36744557    | 36744577  | GCAATTACTctgctcatctgca  | RC       | 7.7                  |                 | 0.772 | -3774      | upstream | 1.52 |
|             |                                                                                                                                                                                        |                        |                |                                                                                                             |                         | 36744936    | 36744956  | gagttgctctggtcatggtgt   | RC       | 8.4                  |                 | 0.766 | -3395      | upstream |      |
| 36745787    | 36745807                                                                                                                                                                               | taactgtgattttgctgctgt  |                |                                                                                                             |                         | FW          | 7.4       | 0.786                   | -2544    | upstream             |                 |       |            |          |      |
| 36745991    | 36746011                                                                                                                                                                               | TGCTCTGACTGAGTCTATGA   |                |                                                                                                             |                         | FW          | 9.7       | 0.875                   | -2340    | upstream             |                 |       |            |          |      |
| 36746189    | 36746209                                                                                                                                                                               | GCAACTCCTCAGTCATTATA   |                |                                                                                                             |                         | RC          | 8.6       | 0.799                   | -2142    | upstream             |                 |       |            |          |      |
| 36746501    | 36746521                                                                                                                                                                               | GCACAttgactaaagatgacc  |                |                                                                                                             |                         | FW          | 7.1       | 0.808                   | -1830    | upstream             |                 |       |            |          |      |
| 36746539    | 36746559                                                                                                                                                                               | ttgaaggctctgctcattaggg |                |                                                                                                             |                         | RC          | 7.6       | 0.85                    | -1792    | upstream             |                 |       |            |          |      |
| 36748735    | 36748755                                                                                                                                                                               | GAAAGTCCCGGTGACCTTGG   |                |                                                                                                             |                         | RC          | 7.8       | 0.774                   | 404      | intron1              |                 |       |            |          |      |
| 36750701    | 36750721                                                                                                                                                                               | TAACCTCAGCAGGACTTAG    |                |                                                                                                             |                         | FW          | 11.5      | 0.808                   | 2370     | downstream           |                 |       |            |          |      |
| 36751109    | 36751129                                                                                                                                                                               | GGAAATGCCTTCTCATTCTGT  |                |                                                                                                             |                         | RC          | 9.1       | 0.798                   | 2778     | downstream           |                 |       |            |          |      |
| 36752251    | 36752271                                                                                                                                                                               | ttatatacttaagtcactgcat |                |                                                                                                             |                         | RC          | 9         | 0.805                   | 3920     | downstream           |                 |       |            |          |      |
| Cox6a2      | cytochrome c oxidase, subunit VI a, polypeptide 2<br><br>NM_009943 chr7 135348948 135349880 - chr7 F3 7 61.0 cM                                                                        | NM_009943              |                |                                                                                                             |                         | 135346112   | 135346132 | ACAAGCCCTTTCTCACCACTG   | RC       | 9.2                  | 0.797           | 3768  | downstream | 2.78     |      |
|             |                                                                                                                                                                                        |                        |                |                                                                                                             |                         | 135346982   | 135347002 | TGACTCTGACTTGTGTAGTCTAG | FW       | 6.5                  | 0.762           | 2898  | downstream |          |      |
|             |                                                                                                                                                                                        |                        | 135347205      | 135347225                                                                                                   | GCTTCGGCTGGATCAGTCAAG   | RC          | 6.4       | 0.794                   | 2675     | downstream           |                 |       |            |          |      |
|             |                                                                                                                                                                                        |                        | 135348626      | 135348646                                                                                                   | AGATCCTGACCCAGCCGCCA    | FW          | 8.1       | 0.864                   | 1254     | downstream           |                 |       |            |          |      |
|             |                                                                                                                                                                                        |                        | Cox6b1         | cytochrome c oxidase, subunit Vlb polypeptide 1<br><br>NM_025628 chr7 31401992 31411170 - chr7 B1 7 10.0 cM | NM_025628               | 31408296    | 31408316  | GGCCCTCACTGAGCAGGGAT    | FW       | 7.6                  | 0.806           | 2874  | intron3    |          | 1.34 |
| 31408507    | 31408527                                                                                                                                                                               | GTCAATGCCTTCTCACAGCGG  |                |                                                                                                             |                         | RC          | 9.1       | 0.793                   | 2663     | exon3                |                 |       |            |          |      |
| 31409987    | 31410007                                                                                                                                                                               | ccaaggtcacacagacCCCGAG |                |                                                                                                             |                         | FW          | 10.2      | 0.823                   | 1183     | intron1              |                 |       |            |          |      |
| 31412904    | 31412924                                                                                                                                                                               | AGGGACTGAGTGAAGCAGAAAT |                |                                                                                                             |                         | FW          | 10.1      | 0.841                   | -1734    | upstream             |                 |       |            |          |      |
| 31415129    | 31415149                                                                                                                                                                               | ATAGTCTCTCAGTCAAGATTG  |                |                                                                                                             |                         | RC          | 6.7       | 0.771                   | -3959    | upstream             |                 |       |            |          |      |
| 31415624    | 31415644                                                                                                                                                                               | caaggtgagagagcccattg   |                |                                                                                                             |                         | FW          | 9         | 0.802                   | -4454    | upstream             |                 |       |            |          |      |
| 31415852    | 31415872                                                                                                                                                                               | cttgctcttggtcatgatgt   |                |                                                                                                             |                         | RC          | 8.5       | 0.784                   | -4682    | upstream             |                 |       |            |          |      |
| 31415883    | 31415903                                                                                                                                                                               | aaacctgactaaagCTgggtg  |                |                                                                                                             |                         | FW          | 12.3      | 0.899                   | -4713    | upstream             |                 |       |            |          |      |
| 31415928    | 31415948                                                                                                                                                                               | tggggagcagagtcaggggga  |                |                                                                                                             |                         | RC          | 10        | 0.866                   | -4758    | upstream             |                 |       |            |          |      |
| 31416081    | 31416101                                                                                                                                                                               | AAACCTGACTTAAGCAAACC   |                |                                                                                                             |                         | FW          | 8.9       | 0.786                   | -4911    | upstream             |                 |       |            |          |      |
| 31416136    | 31416156                                                                                                                                                                               | ATTTTCACTAAAGTCACTCCT  |                |                                                                                                             |                         | RC          | 7.8       | 0.773                   | -4966    | upstream             |                 |       |            |          |      |
| Cox7a1      | cytochrome c oxidase, subunit VIIa 1<br><br>NM_009944 chr7 30964635 30971049 + chr7 B1 7 8.0 cM                                                                                        | NM_009944              |                |                                                                                                             |                         | 30964465    | 30964485  | GAGTAAGTACTGTGGCTTTGG   | FW       | 7.9                  | 0.837           | -4724 | upstream   | 4.06     |      |
|             |                                                                                                                                                                                        |                        |                |                                                                                                             |                         | 30964540    | 30964560  | TTGAAGTTACTGTGCAATTTT   | FW       | 8.2                  | 0.778           | -4649 | upstream   |          |      |
|             |                                                                                                                                                                                        |                        | 30965068       | 30965088                                                                                                    | aaggctcagagtgagaccct    | RC          | 6.4       | 0.777                   | -4121    | upstream             |                 |       |            |          |      |
|             |                                                                                                                                                                                        |                        | 30966089       | 30966109                                                                                                    | tttctgtttacacagcggcttac | FW          | 7.2       | 0.78                    | -3100    | upstream             |                 |       |            |          |      |
|             |                                                                                                                                                                                        |                        | 30967724       | 30967744                                                                                                    | TGGCTGCCATGTCACTCTGT    | RC          | 7.2       | 0.832                   | -1465    | upstream             |                 |       |            |          |      |
|             |                                                                                                                                                                                        |                        | 30968438       | 30968458                                                                                                    | taaaagttctgggtcaccacgg  | RC          | 8.3       | 0.77                    | -751     | upstream             |                 |       |            |          |      |
|             |                                                                                                                                                                                        |                        | 30968885       | 30968905                                                                                                    | AGATCCTGACTTGGCCCTGAG   | FW          | 9.1       | 0.845                   | -304     | upstream             |                 |       |            |          |      |
|             |                                                                                                                                                                                        |                        | 30972440       | 30972460                                                                                                    | TGACCATGAAATGCGGCTGC    | FW          | 8         | 0.766                   | 3251     | downstream           |                 |       |            |          |      |
|             |                                                                                                                                                                                        |                        | 30973581       | 30973601                                                                                                    | ACCAAGGCTGAGTCAACCA     | RC          | 14.2      | 0.916                   | 4392     | downstream           |                 |       |            |          |      |
|             |                                                                                                                                                                                        |                        | 30973743       | 30973763                                                                                                    | atgagtgcttggtcacaacc    | RC          | 6.9       | 0.829                   | 4554     | downstream           |                 |       |            |          |      |
|             |                                                                                                                                                                                        |                        | 30973999       | 30974019                                                                                                    | CATGGCTGACTCTGCCCTTT    | FW          | 10.4      | 0.857                   | 4810     | downstream           |                 |       |            |          |      |
|             |                                                                                                                                                                                        |                        | Cox7c          | cytochrome c oxidase, subunit VIIc<br><br>NM_007749 chr13 86184402 86186400 - chr13 C3 13                   | NM_007749               | 86184055    | 86184075  | GCATATGCATTTCTCATTGGG   | RC       | 6.9                  | 0.777           | 2345  | downstream |          | 1.30 |
|             |                                                                                                                                                                                        |                        |                |                                                                                                             |                         | 86188684    | 86188704  | ctactgtgaaatgcaagtgcc   | FW       | 8.6                  | 0.816           | -2284 | upstream   |          |      |
| 86190185    | 86190205                                                                                                                                                                               | tcattgtagctctgctcttta  |                |                                                                                                             |                         | FW          | 10.7      | 0.781                   | -3785    | upstream             |                 |       |            |          |      |
| 86190993    | 86191013                                                                                                                                                                               | ttttagtgacatagcacaac   |                |                                                                                                             |                         | FW          | 9.6       | 0.879                   | -4593    | upstream             |                 |       |            |          |      |
| 86191176    | 86191196                                                                                                                                                                               | tgtgctctggtcagctttt    |                |                                                                                                             |                         | RC          | 7.5       | 0.789                   | -4776    | upstream             |                 |       |            |          |      |
| Cox8b       | cytochrome c oxidase, subunit VIIIb<br><br>NM_007751 chr7 148084840 148086345 - chr7 F5 7 68.8 cM                                                                                      | NM_007751              |                |                                                                                                             |                         | 148084875   | 148084895 | GGATGTCAACTTCAGTCTGTC   | RC       | 6.7                  | 0.782           | 1470  | UTR3       | 3.70     |      |
|             |                                                                                                                                                                                        |                        | 148085318      | 148085338                                                                                                   | AGAGGTTCACTCAGCTCCTGT   | FW          | 7.3       | 0.803                   | 1027     | intron1              |                 |       |            |          |      |
|             |                                                                                                                                                                                        |                        | 148086808      | 148086828                                                                                                   | GTTAGTGTGCTGTATCTCTGC   | RC          | 13.2      | 0.837                   | -463     | upstream             |                 |       |            |          |      |
|             |                                                                                                                                                                                        |                        | 148087771      | 148087791                                                                                                   | ATAAAGCTGGGTATCTTCA     | RC          | 7.4       | 0.78                    | -1426    | upstream             |                 |       |            |          |      |
|             |                                                                                                                                                                                        |                        | 148090407      | 148090427                                                                                                   | TGACATTGAAGCAGCACTGA    | FW          | 8.8       | 0.836                   | -4062    | upstream             |                 |       |            |          |      |
| Cpt1b       | cDNA sequence BC090627///carnitine palmitoyltransferase 1b, muscle<br><br>NM_009948 chr15 89246835 89256293 - chr15 E3 15///chr15 E3 15 52.6 cM                                        | NM_009948 NR_004843    | 89252833       | 89252853                                                                                                    | GATGGAGCAGAGTCAGTAGGC   | RC          | 8.9       | 0.856                   | 3460     | intron7              | 3.98            |       |            |          |      |
|             |                                                                                                                                                                                        |                        |                |                                                                                                             |                         |             |           |                         |          |                      |                 |       |            |          |      |
|             |                                                                                                                                                                                        |                        |                |                                                                                                             |                         |             |           |                         |          |                      |                 |       |            |          |      |
| Cpt2        | carnitine palmitoyltransferase 2<br><br>NM_009949 chr4 107594592-107594759 Mel Mafk chr4:107593721-107595009<br>2-Ch12 Mafk chr4:107594592-107594759 Mel Mafk chr4:107593721-107595009 | NM_009949              | 107594150      | 107594170                                                                                                   | AATTGCTGACACGAAAGTCT    | FW          | 6.8       | 0.778                   | 2044     | <sup>1</sup> intron1 | 1.52            |       |            |          |      |
|             |                                                                                                                                                                                        |                        | 107594640      | 107594660                                                                                                   | CCCATCTGACTCAGCAATGA    | FW          | 15        | 0.941                   | 1554     | <sup>2</sup> intron1 |                 |       |            |          |      |
|             |                                                                                                                                                                                        |                        | 107591589      | 107591609                                                                                                   | tgccactgactctgaaactaa   | FW          | 9.4       | 0.781                   | 4605     | intron1              |                 |       |            |          |      |
|             |                                                                                                                                                                                        |                        | 107591785      | 107591805                                                                                                   | cggagctgactcagagagctct  | FW          | 7.1       | 0.781                   | 4409     | intron1              |                 |       |            |          |      |
|             |                                                                                                                                                                                        |                        | 107592719      | 107592739                                                                                                   | TAAGCTACTGAGTCACTGCT    | RC          | 10.1      | 0.821                   | 3475     | intron1              |                 |       |            |          |      |
|             |                                                                                                                                                                                        |                        | 107593557      | 107593577                                                                                                   | AGTCACTGACAGACCATCA     | FW          | 9.7       | 0.878                   | 2637     | intron1              |                 |       |            |          |      |
|             |                                                                                                                                                                                        |                        | 107598252      | 107598272                                                                                                   | CAAAAGTACTGAGCCACAAA    | FW          | 11.3      | 0.894                   | -2058    | upstream             |                 |       |            |          |      |

| Gene symbol     | Gene title/Transcript Info/Chromosomal location/ChIP-seq                                                                                                                                     | RefSeq Transcript ID   | ARE_start(mm9) | ARE_end(mm9)                                                                                                                                                | ARE_seq                   | Orientation | PWM       | MS                    | Dist_TSS | Location              | FI (SFN vs PBS) |       |                      |         |      |
|-----------------|----------------------------------------------------------------------------------------------------------------------------------------------------------------------------------------------|------------------------|----------------|-------------------------------------------------------------------------------------------------------------------------------------------------------------|---------------------------|-------------|-----------|-----------------------|----------|-----------------------|-----------------|-------|----------------------|---------|------|
| <i>Crat</i>     | carnitine acetyltransferase<br>NM_007760 chr2:30255995-30271268 - chr2 B 2 18.0 cM                                                                                                           | NM_007760              | 107601105      | 107601125                                                                                                                                                   | agataatgacccccgctatgt     | FW          | 7.7       | 0.829                 | -4911    | upstream              | 1.29            |       |                      |         |      |
|                 |                                                                                                                                                                                              |                        | 107601142      | 107601162                                                                                                                                                   | gagtttgcctccatagaga       | RC          | 7.5       | 0.826                 | -4948    | upstream              |                 |       |                      |         |      |
|                 |                                                                                                                                                                                              |                        | 30266662       | 30266682                                                                                                                                                    | CCACCTGCTGACTCATAGCCA     | RC          | 13.3      | 0.877                 | 4606     | intron2               |                 |       |                      |         |      |
|                 |                                                                                                                                                                                              |                        | 30268778       | 30268798                                                                                                                                                    | AGAAGCAGCCTACTACTTCTCT    | RC          | 7.6       | 0.785                 | 2490     | intron1               |                 |       |                      |         |      |
|                 |                                                                                                                                                                                              |                        | 30270971       | 30270991                                                                                                                                                    | AAGGTCCGCGAGTCACTGCCG     | RC          | 12.7      | 0.876                 | 297      | UTR5                  |                 |       |                      |         |      |
|                 |                                                                                                                                                                                              |                        | 30273244       | 30273264                                                                                                                                                    | CCCgggctcagtaagagtcgc     | RC          | 6.9       | 0.793                 | -1976    | upstream              |                 |       |                      |         |      |
|                 |                                                                                                                                                                                              |                        | 30274916       | 30274936                                                                                                                                                    | CCAATTGCAGACTCAGGCTGA     | RC          | 14.6      | 0.856                 | -3648    | upstream              |                 |       |                      |         |      |
| <i>Cs</i>       | citrate synthase<br>NM_026444 chr10:127774887-127799535 + chr10 D3 10<br>1-Ch12 Mafk chr10:127777377-127777949<br>2-Ch12 Mafk chr10:127777377-127777949 Ese14 Mafk chr10:127777460-127777973 | NM_026444              | 127777406      | 127777426                                                                                                                                                   | CCGTTCCTTATGTCATTGGTG     | RC          | 8.6       | 0.779                 | 2519     | <sup>1</sup> intron1  | 1.43            |       |                      |         |      |
|                 |                                                                                                                                                                                              |                        | 127777614      | 127777634                                                                                                                                                   | gagagatgactcagcaggttaa    | FW          | 16.2      | 0.947                 | 2727     | <sup>2</sup> intron1  |                 |       |                      |         |      |
|                 |                                                                                                                                                                                              |                        | 127775480      | 127775500                                                                                                                                                   | TGTAAGTGACCCCGCGTTTT      | FW          | 7.7       | 0.825                 | 593      | intron1               |                 |       |                      |         |      |
|                 |                                                                                                                                                                                              |                        | 127776320      | 127776340                                                                                                                                                   | TGAACCTGAAAAGGCTTTGG      | FW          | 6.7       | 0.792                 | 1433     | intron1               |                 |       |                      |         |      |
|                 |                                                                                                                                                                                              |                        | 127776402      | 127776422                                                                                                                                                   | GGAGGGTGCAGTGGCCACATT     | FW          | 11        | 0.858                 | 1515     | intron1               |                 |       |                      |         |      |
|                 |                                                                                                                                                                                              |                        | 127776999      | 127777019                                                                                                                                                   | gtgattgctggtgaagcataa     | RC          | 10.1      | 0.815                 | 2112     | intron1               |                 |       |                      |         |      |
|                 |                                                                                                                                                                                              |                        | 127778325      | 127778345                                                                                                                                                   | CAACATGCTTATCAGCCTTA      | RC          | 10.3      | 0.827                 | 3438     | intron1               |                 |       |                      |         |      |
|                 |                                                                                                                                                                                              |                        | 127778463      | 127778483                                                                                                                                                   | GGGAATCTGTGTCAAGTGA       | RC          | 8.5       | 0.797                 | 3576     | intron1               |                 |       |                      |         |      |
|                 |                                                                                                                                                                                              |                        | 127778774      | 127778794                                                                                                                                                   | AACAAGCAGAGTCAATTTTC      | RC          | 11.2      | 0.874                 | 3887     | intron1               |                 |       |                      |         |      |
|                 |                                                                                                                                                                                              |                        | 127778943      | 127778963                                                                                                                                                   | TCATGGGCTCAGTCAAGTCA      | RC          | 10        | 0.882                 | 4056     | intron1               |                 |       |                      |         |      |
|                 |                                                                                                                                                                                              |                        | 127779466      | 127779486                                                                                                                                                   | cgcattgctcaacacagcattac   | FW          | 8.9       | 0.806                 | 4579     | intron1               |                 |       |                      |         |      |
|                 |                                                                                                                                                                                              |                        | <i>Csrp3</i>   | cysteine and glycine-rich protein 3<br>NM_013808 chr7:56085767-56099041 - chr7 B4 7                                                                         | NM_001198841<br>NM_013808 | 56094506    | 56094526  | TCTCTCTTAAGTACAGAGA   | RC       | 9.8                   |                 | 0.827 | 4535                 | intron2 | 4.64 |
|                 |                                                                                                                                                                                              |                        |                |                                                                                                                                                             |                           | 56095911    | 56095931  | CCTCGGTGACTGGGCTTTCCC | FW       | 7.5                   |                 | 0.846 | 3130                 | intron1 |      |
| 56096371        | 56096391                                                                                                                                                                                     | GGAAAGGCTGAATCAAGTCTG  |                |                                                                                                                                                             |                           | RC          | 7         | 0.824                 | 2670     | intron1               |                 |       |                      |         |      |
| 56097098        | 56097118                                                                                                                                                                                     | AACAGCCCTGGGTCACTTTC   |                |                                                                                                                                                             |                           | RC          | 7.4       | 0.768                 | 1943     | intron1               |                 |       |                      |         |      |
| 56097460        | 56097480                                                                                                                                                                                     | GGGAACGTATACAGCAATTAG  |                |                                                                                                                                                             |                           | FW          | 9.8       | 0.832                 | 1581     | intron1               |                 |       |                      |         |      |
| 56097957        | 56097977                                                                                                                                                                                     | TGACTGTCACTCAGCAGTGT   |                |                                                                                                                                                             |                           | FW          | 11.4      | 0.793                 | 1084     | intron1               |                 |       |                      |         |      |
| 56099592        | 56099612                                                                                                                                                                                     | TCCAGTGACCAAGCATCTCA   |                |                                                                                                                                                             |                           | FW          | 9.4       | 0.88                  | -551     | upstream              |                 |       |                      |         |      |
| 56102215        | 56102235                                                                                                                                                                                     | GGAAACTGATGATGAGCAGTA  |                |                                                                                                                                                             |                           | FW          | 7.2       | 0.8                   | 1206     | intron1               |                 |       |                      |         |      |
| 56102305        | 56102325                                                                                                                                                                                     | CATACTGCTTATTAACTGGCC  |                |                                                                                                                                                             |                           | RC          | 9.5       | 0.762                 | 1116     | intron1               |                 |       |                      |         |      |
| <i>Cyc1</i>     | cytochrome c-1<br>NM_025567 chr15:76173952-76176364 + chr15 D3 15                                                                                                                            | NM_025567              |                |                                                                                                                                                             |                           | 76169003    | 76169023  | ccccggcttgcctcagcctga | RC       | 7.1                   | 0.79            | -4949 | upstream             | 1.68    |      |
|                 |                                                                                                                                                                                              |                        |                |                                                                                                                                                             |                           | 76169166    | 76169186  | actccagctgctcgaagtga  | RC       | 12                    | 0.892           | -4786 | upstream             |         |      |
|                 |                                                                                                                                                                                              |                        | 76173414       | 76173434                                                                                                                                                    | acagctacagctgctcagtgca    | RC          | 9         | 0.762                 | -538     | upstream              |                 |       |                      |         |      |
|                 |                                                                                                                                                                                              |                        | 76175328       | 76175348                                                                                                                                                    | TAACCTGAGGCTGCAAGAGC      | FW          | 8.7       | 0.799                 | 1376     | exon4                 |                 |       |                      |         |      |
|                 |                                                                                                                                                                                              |                        | 76176122       | 76176142                                                                                                                                                    | ATGCCATGACGGCGCATAAGT     | FW          | 6.5       | 0.786                 | 2170     | exon7                 |                 |       |                      |         |      |
|                 |                                                                                                                                                                                              |                        | 76177963       | 76177983                                                                                                                                                    | CCCCAATGACTGAGGAAACAA     | FW          | 10.4      | 0.815                 | 4011     | downstream            |                 |       |                      |         |      |
|                 |                                                                                                                                                                                              |                        | 76178196       | 76178216                                                                                                                                                    | GCCCAATGACCCAGCGCTCCA     | FW          | 11.2      | 0.883                 | 4244     | downstream            |                 |       |                      |         |      |
|                 |                                                                                                                                                                                              |                        | 76178600       | 76178620                                                                                                                                                    | GCCGCTGCTTCTCATCCCCA      | RC          | 9.3       | 0.818                 | 4648     | downstream            |                 |       |                      |         |      |
|                 |                                                                                                                                                                                              |                        | <i>Cycs</i>    | cytochrome c, somatic<br>NM_007808 chr6:50512561-50516473 - chr6 B2.3 6 23.0 cM<br>1-Ch12 Nrf2 chr6:50516052-50517407<br>2-Ch12 Nrf2 chr6:50516052-50517407 | NM_007808                 | 50516198    | 50516218  | CCAGATGCTTAATCAGGAAA  | RC       | 7                     | 0.829           | 275   | <sup>1</sup> intron1 |         | 1.70 |
| 50516894        | 50516914                                                                                                                                                                                     | ACCCAGGCTTGGTCAAGGCTT  |                |                                                                                                                                                             |                           | RC          | 6.7       | 0.84                  | -421     | <sup>2</sup> upstream |                 |       |                      |         |      |
| 50512787        | 50512807                                                                                                                                                                                     | ACTAGTCTTAGGTCATGCCA   |                |                                                                                                                                                             |                           | RC          | 6.4       | 0.763                 | 3686     | UTR3                  |                 |       |                      |         |      |
| 50514771        | 50514791                                                                                                                                                                                     | AAAACCTGCAGTCAAGAAATA  |                |                                                                                                                                                             |                           | RC          | 8.7       | 0.838                 | 1702     | UTR3                  |                 |       |                      |         |      |
| 50515755        | 50515775                                                                                                                                                                                     | CAGGGTGTCAACTCAGTCCAC  |                |                                                                                                                                                             |                           | RC          | 6.8       | 0.826                 | 718      | intron1               |                 |       |                      |         |      |
| 50519362        | 50519382                                                                                                                                                                                     | TCTTTCGACCGTCACTTCTC   |                |                                                                                                                                                             |                           | RC          | 7.9       | 0.839                 | -2889    | upstream              |                 |       |                      |         |      |
| 50520045        | 50520065                                                                                                                                                                                     | cttgcctctctggctcagatgt |                |                                                                                                                                                             |                           | RC          | 8.5       | 0.784                 | -3572    | upstream              |                 |       |                      |         |      |
| 50521466        | 50521486                                                                                                                                                                                     | TCCCAATGACTTTGTAAGGT   |                |                                                                                                                                                             |                           | FW          | 9.3       | 0.774                 | -4993    | upstream              |                 |       |                      |         |      |
| <i>Cyp2e1</i>   | cytochrome P450, family 2, subfamily e, polypeptide 1<br>NM_021282 chr7:147949730-147960876 + chr7 F5 7 68.4 cM                                                                              | NM_021282              |                |                                                                                                                                                             |                           | 147946657   | 147946677 | GTTAATGCTGAGTTAATACTG | RC       | 8.4                   | 0.824           | -3073 | upstream             | 3.52    |      |
|                 |                                                                                                                                                                                              |                        | 147947066      | 147947086                                                                                                                                                   | AGCTGTGCAGATTCAGGCATT     | RC          | 7.7       | 0.81                  | -2664    | upstream              |                 |       |                      |         |      |
|                 |                                                                                                                                                                                              |                        | 147947157      | 147947177                                                                                                                                                   | TAAGATTGACTCAGCCTGAGC     | FW          | 12.3      | 0.911                 | -2573    | upstream              |                 |       |                      |         |      |
|                 |                                                                                                                                                                                              |                        | 147947582      | 147947602                                                                                                                                                   | tgatgatgactgggctaggca     | FW          | 7.3       | 0.84                  | -2148    | upstream              |                 |       |                      |         |      |
|                 |                                                                                                                                                                                              |                        | 147948894      | 147948914                                                                                                                                                   | CCTGGATGACCAAGCAGTGG      | FW          | 9.1       | 0.818                 | -836     | upstream              |                 |       |                      |         |      |
|                 |                                                                                                                                                                                              |                        | 147950411      | 147950431                                                                                                                                                   | TGTACTGTAGGTAAAGTAGA      | RC          | 6.8       | 0.78                  | 681      | intron1               |                 |       |                      |         |      |
| <i>D10hu81e</i> | DNA segment, Chr 10, Johns Hopkins University 81 expressed<br>NM_138601 chr10:77624811-77632513 - chr10 C1 10 41.7 cM                                                                        | NM_138601              | 77628609       | 77628629                                                                                                                                                    | GCTAAACCTCAGTCAACCTTC     | RC          | 7.7       | 0.782                 | 3904     | intron4               | 1.48            |       |                      |         |      |
|                 |                                                                                                                                                                                              |                        | 77630170       | 77630190                                                                                                                                                    | AAAATGGCAGCATCATGGTTA     | RC          | 10        | 0.788                 | 2343     | exon4                 |                 |       |                      |         |      |
|                 |                                                                                                                                                                                              |                        | 77630235       | 77630255                                                                                                                                                    | CCTTGTGACTCTGCCAAAAC      | FW          | 10.6      | 0.863                 | 2278     | exon4                 |                 |       |                      |         |      |
|                 |                                                                                                                                                                                              |                        | 77631897       | 77631917                                                                                                                                                    | GGTTGTGACTCCGCGAGTGT      | FW          | 8         | 0.871                 | 616      | intron2               |                 |       |                      |         |      |
|                 |                                                                                                                                                                                              |                        | 77632044       | 77632064                                                                                                                                                    | CACTGCGCTTGGTCACTCTCT     | RC          | 11.2      | 0.868                 | 469      | intron2               |                 |       |                      |         |      |
|                 |                                                                                                                                                                                              |                        | 77634016       | 77634036                                                                                                                                                    | TCAGCATGAGTGGCACCTGT      | FW          | 12.5      | 0.833                 | -1503    | upstream              |                 |       |                      |         |      |
|                 |                                                                                                                                                                                              |                        | 77634560       | 77634580                                                                                                                                                    | TGGCTTGTGCTCCTAGGCGAG     | RC          | 9.5       | 0.838                 | -2047    | upstream              |                 |       |                      |         |      |
|                 |                                                                                                                                                                                              |                        | 77635602       | 77635622                                                                                                                                                    | GCAACTGCTCAGTGACAGATA     | RC          | 9.4       | 0.821                 | -3089    | upstream              |                 |       |                      |         |      |
|                 |                                                                                                                                                                                              |                        | 77636261       | 77636281                                                                                                                                                    | CAATGGCTGGGTCACTTGAT      | RC          | 9.7       | 0.87                  | -3748    | upstream              |                 |       |                      |         |      |
|                 |                                                                                                                                                                                              |                        | 77637222       | 77637242                                                                                                                                                    | CGTGCCTGACACAGGATAACA     | FW          | 8.1       | 0.785                 | -4709    | upstream              |                 |       |                      |         |      |
| <i>Decr1</i>    | 2,4-dienoyl CoA reductase 1, mitochondrial<br>NM_026172 chr4:15844386-15872654 - chr4 A2 4<br>1-Ch12 Mafk chr4:15871913-15872113                                                             | NM_026172              | 15871937       | 15871957                                                                                                                                                    | TAGCTTTGACTAAGGCTTGC      | FW          | 7.5       | 0.775                 | 717      | <sup>1</sup> intron1  | 1.58            |       |                      |         |      |
|                 |                                                                                                                                                                                              |                        | 15869397       | 15869417                                                                                                                                                    | gaacagtgactaaagacagatg    | FW          | 9         | 0.79                  | 3257     | intron1               |                 |       |                      |         |      |
|                 |                                                                                                                                                                                              |                        | 15870227       | 15870247                                                                                                                                                    | AAACAGTTACTGAGCTATTTC     | FW          | 10.8      | 0.812                 | 2427     | intron1               |                 |       |                      |         |      |
|                 |                                                                                                                                                                                              |                        | 15874304       | 15874324                                                                                                                                                    | aaaacggctaggttatattgg     | RC          | 6.8       | 0.768                 | -1650    | upstream              |                 |       |                      |         |      |
|                 |                                                                                                                                                                                              |                        | 15875143       | 15875163                                                                                                                                                    | ttecttacagagctactgctc     | RC          | 8.4       | 0.781                 | -2489    | upstream              |                 |       |                      |         |      |
|                 |                                                                                                                                                                                              |                        | 15875868       | 15875888                                                                                                                                                    | taaaatgctttatcagaaaga     | RC          | 8.6       | 0.819                 | -3214    | upstream              |                 |       |                      |         |      |
|                 |                                                                                                                                                                                              |                        | 15877021       | 15877041                                                                                                                                                    | GGAGCTGCTGAATCAGGTCTT     | RC          | 9.5       | 0.854                 | -4367    | upstream              |                 |       |                      |         |      |
|                 |                                                                                                                                                                                              |                        | 15877387       | 15877407                                                                                                                                                    | caagcttcacatagcccttgt     | FW          | 6.8       | 0.764                 | -4733    | upstream              |                 |       |                      |         |      |
|                 |                                                                                                                                                                                              |                        | <i>Dgat2</i>   | diacylglycerol O-acyltransferase 2<br>NM_026384                                                                                                             | NM_026384                 | 106326548   | 106326568 | GCTGAGGCCAAGTCAAGGATG | RC       | 6.9                   |                 | 0.828 | 4675                 | intron1 | 2.47 |
| 106326604       | 106326624                                                                                                                                                                                    | CAGACTGCAAACTCAGACCCA  |                |                                                                                                                                                             |                           | RC          | 7.5       | 0.796                 | 4619     | intron1               |                 |       |                      |         |      |

| Gene symbol   | Gene title/Transcript Info/Chromosomal location/ChIP-seq                                                                                                                                                           | RefSeq Transcript ID      | ARE_start(mm9) | ARE_end(mm9)                                                                                    | ARE_seq                 | Orientation | PWM      | MS                     | Dist_TSS | Location                | FI (SFN vs PBS) |
|---------------|--------------------------------------------------------------------------------------------------------------------------------------------------------------------------------------------------------------------|---------------------------|----------------|-------------------------------------------------------------------------------------------------|-------------------------|-------------|----------|------------------------|----------|-------------------------|-----------------|
|               | NM_026384 chr7 106302172 106331223 - chr7 7 F1                                                                                                                                                                     |                           | 106327126      | 106327146                                                                                       | ACTTATGCACAGTGTGGAGG    | RC          | 8.2      | 0.783                  | 4097     | intron1                 |                 |
|               |                                                                                                                                                                                                                    |                           | 106327882      | 106327902                                                                                       | CTTGCACCTGAGTCACTTCCC   | RC          | 6.5      | 0.782                  | 3341     | intron1                 |                 |
|               |                                                                                                                                                                                                                    |                           | 106330918      | 106330938                                                                                       | CTCGCGTGACAGGGCAGATCC   | FW          | 8.1      | 0.839                  | 305      | exon1                   |                 |
|               |                                                                                                                                                                                                                    |                           | 106331473      | 106331493                                                                                       | GCGACCGCCTGTCTATTCTCC   | RC          | 9.4      | 0.828                  | -250     | upstream                |                 |
|               |                                                                                                                                                                                                                    |                           | 106332342      | 106332362                                                                                       | Tctagtgctgagtgaaaggca   | RC          | 9.9      | 0.834                  | -1119    | upstream                |                 |
|               |                                                                                                                                                                                                                    |                           | 106332566      | 106332586                                                                                       | GCAGCATCAGTCAGCATGTCT   | FW          | 9.8      | 0.788                  | -1343    | upstream                |                 |
|               |                                                                                                                                                                                                                    |                           | 106335194      | 106335214                                                                                       | GAACACTGACTGGGATTTCG    | FW          | 7.5      | 0.767                  | -3971    | upstream                |                 |
|               |                                                                                                                                                                                                                    |                           | 106335354      | 106335374                                                                                       | TCTAGACCTGTGTCACTCTC    | RC          | 7.3      | 0.763                  | -4131    | upstream                |                 |
| <i>Dhrs11</i> | dehydrogenase/reductase (SDR family) member 11<br>NM_177564 chr11 84634229 84642505 - chr11 C 11                                                                                                                   | NM_177564                 | 84639750       | 84639770                                                                                        | GAGCCCTGAGAAAGCAGAGCC   | FW          | 8.5      | 0.815                  | 2755     | intron1                 | 1.58            |
|               |                                                                                                                                                                                                                    |                           | 84639829       | 84639849                                                                                        | AGTGAGTCACTGAGCCTTGTG   | FW          | 9.9      | 0.883                  | 2676     | intron1                 |                 |
|               |                                                                                                                                                                                                                    |                           | 84641718       | 84641738                                                                                        | CCTCACCTCAGTCAATGGTC    | RC          | 6.8      | 0.771                  | 787      | intron1                 |                 |
|               |                                                                                                                                                                                                                    |                           | 84642819       | 84642839                                                                                        | TCCTTTGCTCAATCAGCCCTA   | RC          | 9.3      | 0.837                  | -314     | upstream                |                 |
|               |                                                                                                                                                                                                                    |                           | 84643816       | 84643836                                                                                        | Tgcctttgatccagcaactca   | FW          | 10.1     | 0.861                  | -1311    | upstream                |                 |
|               |                                                                                                                                                                                                                    |                           | 84644361       | 84644381                                                                                        | TTTCACTCACTAAGCACCCAT   | FW          | 6.5      | 0.802                  | -1856    | upstream                |                 |
|               |                                                                                                                                                                                                                    |                           | 84644539       | 84644559                                                                                        | GATGTTGCTCAGTGATCTACA   | RC          | 7.7      | 0.808                  | -2034    | upstream                |                 |
|               |                                                                                                                                                                                                                    |                           | 84644885       | 84644905                                                                                        | AAGCCCTAATATGCAATTCG    | FW          | 7.9      | 0.775                  | -2380    | upstream                |                 |
| 84646877      | 84646897                                                                                                                                                                                                           | AAAACCTAATCACTGAGTTGTT    | FW             | 7.1                                                                                             | 0.802                   | -4372       | upstream |                        |          |                         |                 |
| <i>Dhrs7c</i> | dehydrogenase/reductase (SDR family) member 7C<br>NM_001013013 chr11 67611772 67629504 + chr11 B3 11                                                                                                               | NM_001013013              | 67607568       | 67607588                                                                                        | tcaaatgacactgacacaagg   | FW          | 7.4      | 0.839                  | -4204    | upstream                | 3.51            |
|               |                                                                                                                                                                                                                    |                           | 67609297       | 67609317                                                                                        | ctaaagaacacagctactcttc  | RC          | 7        | 0.835                  | -2475    | upstream                |                 |
|               |                                                                                                                                                                                                                    |                           | 67609458       | 67609478                                                                                        | gaactataaactcaagcaattcc | FW          | 10.8     | 0.838                  | -2314    | upstream                |                 |
|               |                                                                                                                                                                                                                    |                           | 67611498       | 67611518                                                                                        | CAGATGGCTCAGTCAACCACT   | RC          | 6.4      | 0.781                  | -274     | upstream                |                 |
|               |                                                                                                                                                                                                                    |                           | 67612091       | 67612111                                                                                        | GCCAATCCTTTGTCATCCCGC   | RC          | 9.4      | 0.786                  | 319      | intron1                 |                 |
|               |                                                                                                                                                                                                                    |                           | 67612437       | 67612457                                                                                        | GGGTTGCCAATCAACAGTTT    | RC          | 7.7      | 0.811                  | 665      | intron2                 |                 |
|               |                                                                                                                                                                                                                    |                           | 67612814       | 67612834                                                                                        | CATCACACTCAGTCACTGCTT   | RC          | 6.7      | 0.773                  | 1042     | intron2                 |                 |
|               |                                                                                                                                                                                                                    |                           | 67613178       | 67613198                                                                                        | TCTCCCTGAGACTGCTGCTTC   | FW          | 7        | 0.77                   | 1406     | intron2                 |                 |
|               |                                                                                                                                                                                                                    |                           | 67615270       | 67615290                                                                                        | TCAAGTGTGTGTACCTTGT     | RC          | 12.4     | 0.835                  | 3498     | intron2                 |                 |
|               |                                                                                                                                                                                                                    |                           | 67616559       | 67616579                                                                                        | ATCATGGCTGCTCAACCCCT    | RC          | 7.9      | 0.802                  | 4787     | intron2                 |                 |
| <i>Dlat</i>   | dihydroipoamide S-acetyltransferase (E2 component of pyruvate dehydrogenase complex)<br>NM_145614 chr9 50442737 50467885 - chr9 A5.3 9<br>1-Ch12 Mafk chr9:50466382-50467000<br>2-Ch12 Mafk chr9:50466382-50467000 | NM_145614                 | 50466372       | 50466392                                                                                        | ACAGTGGCTTTATCAGTTTCA   | RC          | 7.3      | 0.79                   | 1513     | 1 <sup>st</sup> exon3   | 1.49            |
|               |                                                                                                                                                                                                                    |                           | 50466973       | 50466993                                                                                        | GTATTTACTGAGTCACATTTT   | RC          | 11.8     | 0.837                  | 912      | 2 <sup>nd</sup> intron1 |                 |
|               |                                                                                                                                                                                                                    |                           | 50463779       | 50463799                                                                                        | gatataggctaaagtgattca   | RC          | 9.6      | 0.8                    | 4106     | intron4                 |                 |
|               |                                                                                                                                                                                                                    |                           | 50464585       | 50464605                                                                                        | TTTGTGCACAATCACCACTA    | RC          | 6.9      | 0.795                  | 3300     | intron4                 |                 |
|               |                                                                                                                                                                                                                    |                           | 50465606       | 50465626                                                                                        | GGACTTTCAATCAGCAATAG    | FW          | 7.2      | 0.77                   | 2279     | intron4                 |                 |
|               |                                                                                                                                                                                                                    |                           | 50467081       | 50467101                                                                                        | TGGATCTGAGAAAGCAGTGA    | FW          | 7        | 0.804                  | 804      | intron1                 |                 |
|               |                                                                                                                                                                                                                    |                           | 50469528       | 50469548                                                                                        | CTAGTGTCACTGAGCAGCATC   | FW          | 7.9      | 0.819                  | -1643    | upstream                |                 |
|               |                                                                                                                                                                                                                    |                           | <i>Dnajc15</i> | DnaJ (Hsp40) homolog, subfamily C, member 15<br>NM_025384 chr14 78226023 78274724 - chr14 D3 14 | NM_025384               | 78273146    | 78273166 | gaattggctcttgcaaccaagg | RC       | 8.9                     |                 |
| 78274589      | 78274609                                                                                                                                                                                                           | CGCGCGCAGACTCACCGCTG      |                |                                                                                                 |                         | RC          | 6.9      | 0.791                  | 135      | intron1                 |                 |
| 78274889      | 78274909                                                                                                                                                                                                           | AGACCCCTTACAGAGCCTTGT     |                |                                                                                                 |                         | FW          | 7.9      | 0.771                  | -165     | upstream                |                 |
| 78276257      | 78276277                                                                                                                                                                                                           | CAGGAGTGAAGCCAGCTCTTT     |                |                                                                                                 |                         | FW          | 9.3      | 0.809                  | -1533    | upstream                |                 |
| 78277951      | 78277971                                                                                                                                                                                                           | ttaacttgacacagctggaat     |                |                                                                                                 |                         | FW          | 7.6      | 0.86                   | -3227    | upstream                |                 |
| 78278277      | 78278297                                                                                                                                                                                                           | cttgcttcttggtcaatgatgt    |                |                                                                                                 |                         | RC          | 8.5      | 0.784                  | -3553    | upstream                |                 |
| 78278312      | 78278332                                                                                                                                                                                                           | aaactctgactaaagcaCTTC     |                |                                                                                                 |                         | FW          | 8        | 0.782                  | -3588    | upstream                |                 |
| 78278716      | 78278736                                                                                                                                                                                                           | acgggtgctgcatcactgtca     |                |                                                                                                 |                         | RC          | 10.6     | 0.846                  | -3992    | upstream                |                 |
| <i>Dsc2</i>   | desmocollin 2<br>NM_013505 chr18 20189133 20218055 - chr18 A2 18 7.0 cM                                                                                                                                            | NM_013505                 | 20213365       | 20213385                                                                                        | ACAATTGCTGTTTCATGTAC    | RC          | 11       | 0.843                  | 4690     | intron1                 | 4.91            |
|               |                                                                                                                                                                                                                    |                           | 20216323       | 20216343                                                                                        | GGCAGTGTATATCAGGAAGA    | RC          | 7.6      | 0.813                  | 1732     | intron1                 |                 |
|               |                                                                                                                                                                                                                    |                           | 20216895       | 20216915                                                                                        | TCGATGGCCTAGTCACTCCCA   | RC          | 10.9     | 0.852                  | 1160     | intron1                 |                 |
|               |                                                                                                                                                                                                                    |                           | 20217375       | 20217395                                                                                        | TGACCGTGACCCAGGCTGGG    | FW          | 10.2     | 0.783                  | 680      | intron1                 |                 |
|               |                                                                                                                                                                                                                    |                           | 20218230       | 20218250                                                                                        | GCCCTGGCTGAGTTACAGCTG   | RC          | 8.4      | 0.807                  | -175     | upstream                |                 |
|               |                                                                                                                                                                                                                    |                           | 20219177       | 20219197                                                                                        | ATGTTTGCCAGTGATGATTT    | RC          | 7.5      | 0.779                  | -1122    | upstream                |                 |
|               |                                                                                                                                                                                                                    |                           | 20222458       | 20222478                                                                                        | catgaagccaagtcaaggTct   | RC          | 8.2      | 0.846                  | -4403    | upstream                |                 |
|               |                                                                                                                                                                                                                    |                           | 125068447      | 125068467                                                                                       | AAACAGTGACACAGGCCAGAG   | FW          | 9.7      | 0.783                  | -4536    | upstream                |                 |
| <i>Dut</i>    | deoxyuridine triphosphatase<br>NM_001159646 chr2 125072983 125084785 + chr2 F1 2 70.0 cM                                                                                                                           | NM_001159646<br>NM_023595 | 125069717      | 125069737                                                                                       | AATAATGCCCTGTCAATGTGA   | RC          | 10.8     | 0.85                   | -3266    | upstream                | 1.30            |
|               |                                                                                                                                                                                                                    |                           | 125070403      | 125070423                                                                                       | ACAGCTTGAGACTGCAATTTT   | FW          | 11       | 0.819                  | -2580    | upstream                |                 |
|               |                                                                                                                                                                                                                    |                           | 125072054      | 125072074                                                                                       | acaccatgaccaaggaactc    | FW          | 9        | 0.768                  | -929     | upstream                |                 |
|               |                                                                                                                                                                                                                    |                           | 125073770      | 125073790                                                                                       | AAAGCGTTACTGTGCAGCGTG   | FW          | 8.7      | 0.786                  | 520      | intron1                 |                 |
|               |                                                                                                                                                                                                                    |                           | 125075201      | 125075221                                                                                       | TCACATTGACCCAGTGTGTG    | FW          | 7.4      | 0.774                  | 1951     | intron2                 |                 |
|               |                                                                                                                                                                                                                    |                           | 125075789      | 125075809                                                                                       | AGCTATTGACACAGCGCTTC    | FW          | 8.7      | 0.864                  | 2539     | intron2                 |                 |
|               |                                                                                                                                                                                                                    |                           | 125076808      | 125076828                                                                                       | TAAGTCTGAAATGCAATAGC    | FW          | 9.9      | 0.815                  | 3558     | intron3                 |                 |
|               |                                                                                                                                                                                                                    |                           | <i>Ech1</i>    | enoyl coenzyme A hydratase 1, peroxisomal<br>NM_016772 chr7 29610356 29617258 + chr7 A3 7       | NM_016772               | 29605582    | 29605602 | CATTATGCCCTGGTCAGTCATA | RC       | 8.1                     |                 |
| 29605737      | 29605757                                                                                                                                                                                                           | TCGAGGTGACTGAGGAGAAT      |                |                                                                                                 |                         | FW          | 10.3     | 0.813                  | -4619    | upstream                |                 |
| 29606096      | 29606116                                                                                                                                                                                                           | TCTTGTGCTGCTCATGGAGG      |                |                                                                                                 |                         | RC          | 11.2     | 0.847                  | -4260    | upstream                |                 |
| 29607071      | 29607091                                                                                                                                                                                                           | TTAAATGCTAGGTCACTAGAG     |                |                                                                                                 |                         | RC          | 7.5      | 0.862                  | -3285    | upstream                |                 |
| 29608046      | 29608066                                                                                                                                                                                                           | GGTCTCGTAATCACTGATC       |                |                                                                                                 |                         | RC          | 7.4      | 0.815                  | -2310    | upstream                |                 |
| 29608654      | 29608674                                                                                                                                                                                                           | aaagtggctgagttagatggg     |                |                                                                                                 |                         | RC          | 8        | 0.802                  | -1702    | upstream                |                 |
| 29611618      | 29611638                                                                                                                                                                                                           | cctggatgacagagccagatc     |                |                                                                                                 |                         | FW          | 10.5     | 0.865                  | 1262     | intron3                 |                 |
| 29614939      | 29614959                                                                                                                                                                                                           | AGAGGTGACTCAGAGCTGGC      |                |                                                                                                 |                         | FW          | 9.5      | 0.805                  | 4583     | exon4                   |                 |
| <i>Echs1</i>  | enoyl Coenzyme A hydratase, short chain, 1, mitochondrial<br>NM_053119 chr7 147291621 147302322 - chr7 F4 7                                                                                                        | NM_053119                 | 147298588      | 147298608                                                                                       | TTGAGGACTGTGCAGGCACT    | RC          | 6.7      | 0.762                  | 3734     | intron2                 | 1.43            |
|               |                                                                                                                                                                                                                    |                           | 147299386      | 147299406                                                                                       | cctaagctctggctcaactctg  | RC          | 7.1      | 0.766                  | 2936     | intron1                 |                 |
|               |                                                                                                                                                                                                                    |                           | 147303174      | 147303194                                                                                       | caaccctgacacagcaggaca   | FW          | 15.2     | 0.925                  | -852     | upstream                |                 |
|               |                                                                                                                                                                                                                    |                           | 147304315      | 147304335                                                                                       | cgagggtgacagcaggcaaaa   | FW          | 8        | 0.781                  | -1993    | upstream                |                 |

| Gene symbol  | Gene title/Transcript Info/Chromosomal location/ChIP-seq                                                                                                                                                | RefSeq Transcript ID | ARE_start(mm9) | ARE_end(mm9) | ARE_seq                 | Orientation | PWM  | MS    | Dist_TSS | Location              | FI (SFN vs PBS) |
|--------------|---------------------------------------------------------------------------------------------------------------------------------------------------------------------------------------------------------|----------------------|----------------|--------------|-------------------------|-------------|------|-------|----------|-----------------------|-----------------|
|              |                                                                                                                                                                                                         |                      | 147305083      | 147305103    | AGGGACTGAGCAAGCAGAGTT   | FW          | 7.5  | 0.802 | -2761    | upstream              |                 |
|              |                                                                                                                                                                                                         |                      | 147305532      | 147305552    | gtggggtagccagcaagatt    | FW          | 9.6  | 0.832 | -3210    | upstream              |                 |
|              |                                                                                                                                                                                                         |                      | 147306000      | 147306020    | ACACTggcttagttagggttt   | RC          | 9.6  | 0.801 | -3678    | upstream              |                 |
|              |                                                                                                                                                                                                         |                      | 147306036      | 147306056    | acaccatgaccaaggcaactc   | FW          | 9    | 0.768 | -3714    | upstream              |                 |
|              |                                                                                                                                                                                                         |                      | 147306780      | 147306800    | ACATGATGAAAAGGGCGAAGTA  | FW          | 7.1  | 0.763 | -4458    | upstream              |                 |
| <i>Eci1</i>  | dodecenoyl-Coenzyme A delta isomerase<br>(3,2 trans-enoyl-Coenzyme A isomerase)<br><br>NM_010023 chr17 24563627 24576261 +<br>chr17 A3.3 17                                                             | NM_010023            | 24559705       | 24559725     | TGCCTATAAGTCAGACTCTTA   | FW          | 7.9  | 0.768 | -3922    | upstream              | 1.34            |
|              |                                                                                                                                                                                                         |                      | 24562408       | 24562428     | CACAGATGACCCAGAACCCAGA  | FW          | 6.5  | 0.775 | -1219    | upstream              |                 |
|              |                                                                                                                                                                                                         |                      | 24562661       | 24562681     | TCATGGTGATGTTGCAGGTTA   | FW          | 7    | 0.783 | -966     | upstream              |                 |
|              |                                                                                                                                                                                                         |                      | 24562984       | 24563004     | AGAAGCTGACTCTGCCTGAGA   | FW          | 9.2  | 0.859 | -643     | upstream              |                 |
|              |                                                                                                                                                                                                         |                      | 24564465       | 24564485     | GGACAGTGACAAATGCACCTTAT | FW          | 14.2 | 0.876 | 838      | intron2               |                 |
|              |                                                                                                                                                                                                         |                      | 24564743       | 24564763     | ACCATGGCAAAGTCAGTGGAT   | RC          | 7.5  | 0.833 | 1116     | intron2               |                 |
|              |                                                                                                                                                                                                         |                      | 24564914       | 24564934     | CTCTAGTGAAAAGCAAGGT     | FW          | 7.5  | 0.81  | 1287     | intron2               |                 |
| <i>Endog</i> | endonuclease G<br><br>NM_007931 chr2 30027043 30029589 +<br>chr2 B 2                                                                                                                                    | NM_007931            | 30024166       | 30024186     | tgagcttgatccctgagcttgt  | FW          | 7.4  | 0.768 | -2877    | upstream              | 1.23            |
|              |                                                                                                                                                                                                         |                      | 30024746       | 30024766     | acagctggaagcagccccata   | FW          | 6.7  | 0.805 | -2297    | upstream              |                 |
|              |                                                                                                                                                                                                         |                      | 30028518       | 30028538     | GGGCTTTCTGTGTCACGTGAG   | RC          | 8.6  | 0.803 | 1475     | intron2               |                 |
|              |                                                                                                                                                                                                         |                      | 30029523       | 30029543     | AGATGGGCTGACTCACATTA    | RC          | 9.6  | 0.846 | 2480     | UTR3                  |                 |
|              |                                                                                                                                                                                                         |                      | 30029867       | 30029887     | CCGTCTGCATAGTCACTGCC    | RC          | 12.2 | 0.882 | 2824     | downstream            |                 |
|              |                                                                                                                                                                                                         |                      | 30031008       | 30031028     | tagtctgagactgcaACAGG    | FW          | 7.8  | 0.786 | 3965     | downstream            |                 |
|              |                                                                                                                                                                                                         |                      | 30031445       | 30031465     | GCTGCTGCTGGTTCAAGTCGA   | RC          | 7.8  | 0.817 | 4402     | downstream            |                 |
|              |                                                                                                                                                                                                         |                      | 30031709       | 30031729     | ctttaaactgagtcacctctc   | RC          | 7.3  | 0.786 | 4666     | downstream            |                 |
| <i>Ephx2</i> | epoxide hydrolase 2, cytoplasmic<br><br>NM_007940 chr14 66703208 66743359 -<br>chr14 D 14 32.5 cM                                                                                                       | NM_007940            | 66738523       | 66738543     | gatggctgactagggccattt   | FW          | 9.1  | 0.839 | 4836     | intron1               | 4.36            |
|              |                                                                                                                                                                                                         |                      | 66740683       | 66740703     | agcaactgactcagctacaga   | FW          | 10.3 | 0.891 | 2676     | intron1               |                 |
|              |                                                                                                                                                                                                         |                      | 66741571       | 66741591     | GAAGTACAAGTCAACACGA     | RC          | 6.9  | 0.763 | 1788     | intron1               |                 |
|              |                                                                                                                                                                                                         |                      | 66742998       | 66743018     | TTTTAATTAAGTTCAGATTAG   | FW          | 8.5  | 0.813 | 361      | intron1               |                 |
|              |                                                                                                                                                                                                         |                      | 66743143       | 66743163     | GGACACTGACCCAGCGCGCT    | FW          | 9.8  | 0.874 | 216      | intron1               |                 |
|              |                                                                                                                                                                                                         |                      | 66743280       | 66743300     | CGGGCTGCAGCGTCAAGCTGA   | RC          | 8.9  | 0.864 | 79       | UTR5                  |                 |
|              |                                                                                                                                                                                                         |                      | 66743423       | 66743443     | cAGTACTGACACTGCCTGCC    | FW          | 7    | 0.82  | -64      | upstream              |                 |
|              |                                                                                                                                                                                                         |                      | 66745548       | 66745568     | TGGGTTGAAAAGCAAACGT     | FW          | 7.4  | 0.808 | -2189    | upstream              |                 |
|              |                                                                                                                                                                                                         |                      | 66745635       | 66745655     | TAAAGTTCAAAAGCAAAGAA    | FW          | 12.6 | 0.818 | -2276    | upstream              |                 |
|              |                                                                                                                                                                                                         |                      | 66745956       | 66745976     | gTcaactgcttcttatcttag   | RC          | 7.3  | 0.791 | -2597    | upstream              |                 |
| <i>Etfa</i>  | electron transferring flavoprotein, alpha polypeptide<br><br>NM_145615 chr9 55302242 55360050 -<br>chr9 B 9                                                                                             | NM_145615            | 55355629       | 55355649     | TAATTTGCTAAGTCACTGACA   | RC          | 15.4 | 0.932 | 4421     | intron1               | 1.52            |
|              |                                                                                                                                                                                                         |                      | 55356838       | 55356858     | ATACAATAACTCAGCAAGAA    | FW          | 12.3 | 0.853 | 3212     | intron1               |                 |
|              |                                                                                                                                                                                                         |                      | 55357156       | 55357176     | GACATGCTCAGTACACACAGA   | RC          | 9.8  | 0.826 | 2894     | intron1               |                 |
|              |                                                                                                                                                                                                         |                      | 55359659       | 55359679     | GCAGCGTGACCCGGAAGAGGT   | FW          | 9    | 0.767 | 391      | intron1               |                 |
|              |                                                                                                                                                                                                         |                      | 55360632       | 55360652     | CTCTGCCCTTAGTCAAGCTCA   | RC          | 7.9  | 0.777 | -582     | upstream              |                 |
|              |                                                                                                                                                                                                         |                      | 55361118       | 55361138     | cctccatgataaagcaaaaaca  | FW          | 8.8  | 0.799 | -1068    | upstream              |                 |
|              |                                                                                                                                                                                                         |                      | 55361976       | 55361996     | TGGCCTGCAGACTCACTGGGT   | RC          | 8.5  | 0.824 | -1926    | upstream              |                 |
|              |                                                                                                                                                                                                         |                      | 55362595       | 55362615     | ACTCTTGTGAGTCACTGGT     | RC          | 16.4 | 0.951 | -2545    | upstream              |                 |
|              |                                                                                                                                                                                                         |                      | 55362755       | 55362775     | AAGCTGGCTGAGTGAAGTACC   | RC          | 6.7  | 0.797 | -2705    | upstream              |                 |
|              |                                                                                                                                                                                                         |                      | 55364754       | 55364774     | TAAAGTGCATAGTAAGTCTG    | RC          | 8.8  | 0.776 | -4704    | upstream              |                 |
| <i>Etfb</i>  | electron transferring flavoprotein, beta polypeptide<br><br>NM_026695 chr7 50699441 50713170 +<br>chr7 B2 7 23.0 cM                                                                                     | NM_026695            | 50696181       | 50696201     | ATATCTCTGCTTCAACAGATA   | RC          | 11.3 | 0.849 | -3260    | upstream              | 1.48            |
|              |                                                                                                                                                                                                         |                      | 50697622       | 50697642     | CGAGAGGCGAGTCAAGCAGT    | RC          | 10.8 | 0.872 | -1819    | upstream              |                 |
|              |                                                                                                                                                                                                         |                      | 50697672       | 50697692     | CAGCGGTGAGAAAGCAGTCA    | FW          | 8.4  | 0.784 | -1769    | upstream              |                 |
|              |                                                                                                                                                                                                         |                      | 50699484       | 50699504     | GCAACCTGACCCGGCCAGTGA   | FW          | 8.8  | 0.837 | 43       | UTR5                  |                 |
|              |                                                                                                                                                                                                         |                      | 50699604       | 50699624     | GCAACCTGAGACCCGAGCTAT   | FW          | 10   | 0.813 | 163      | intron1               |                 |
|              |                                                                                                                                                                                                         |                      | 50703248       | 50703268     | acctatgctctgctcagcatat  | RC          | 8.2  | 0.873 | 3807     | intron1               |                 |
|              |                                                                                                                                                                                                         |                      | 50703403       | 50703423     | ACTGCTGCTTCTCAGACAGG    | RC          | 6.7  | 0.804 | 3962     | intron1               |                 |
| <i>Etfdh</i> | electron transferring flavoprotein, dehydrogenase<br><br>NM_025794 chr3 79407709 79432689 -<br>chr3 E3 3 31.8 cM                                                                                        | NM_025794            | 79427860       | 79427880     | TATGAGTGTACAGCTAACT     | FW          | 8.9  | 0.81  | 4829     | intron1               | 1.64            |
|              |                                                                                                                                                                                                         |                      | 79428679       | 79428699     | tatcaagctTAATCACAAITTT  | RC          | 7.3  | 0.82  | 4010     | intron1               |                 |
|              |                                                                                                                                                                                                         |                      | 79431515       | 79431535     | TAGAAAGCAAAGTCAAGTCA    | RC          | 9.1  | 0.85  | 1174     | intron1               |                 |
|              |                                                                                                                                                                                                         |                      | 79432050       | 79432070     | ATGGCTGCAAAGTCAAGTCA    | RC          | 7.7  | 0.854 | 639      | intron1               |                 |
| <i>Fabp3</i> | fatty acid binding protein 3, muscle and heart<br><br>NM_010174 chr4 129986021 129992707 +<br>chr4 D2.2 4 61.0 cM<br><br>1-Ese14 Mafk chr4:129984619-129985343<br>2-Ese14 Mafk chr4:129984619-129985343 | NM_010174            | 129984792      | 129984812    | agatgctgactTGGTAATAAT   | FW          | 7.9  | 0.763 | -1229    | <sup>1</sup> upstream | 3.10            |
|              |                                                                                                                                                                                                         |                      | 129984906      | 129984926    | TGAGTGTGACCATGCCCTGAA   | FW          | 8.1  | 0.82  | -1115    | <sup>2</sup> upstream |                 |
|              |                                                                                                                                                                                                         |                      | 129981501      | 129981521    | TCCTTCTGACTCAGAGTCGTA   | FW          | 6.4  | 0.784 | -4520    | upstream              |                 |
|              |                                                                                                                                                                                                         |                      | 129981664      | 129981684    | acaaatgctctgctcagtgagc  | RC          | 12.2 | 0.896 | -4357    | upstream              |                 |
|              |                                                                                                                                                                                                         |                      | 129982084      | 129982104    | TCCCCTGGAAGCAGCTGGAGA   | FW          | 6.7  | 0.8   | -3937    | upstream              |                 |
|              |                                                                                                                                                                                                         |                      | 129983416      | 129983436    | aaactggctcaggtagtggtgc  | RC          | 8.8  | 0.779 | -2605    | upstream              |                 |
|              |                                                                                                                                                                                                         |                      | 129987160      | 129987180    | CCTACTGCTGAGTTAATCTCC   | RC          | 12.7 | 0.853 | 1139     | intron1               |                 |
|              |                                                                                                                                                                                                         |                      | 129987425      | 129987445    | TCCCCTGGCTATATCATCTCC   | RC          | 8.4  | 0.803 | 1404     | intron1               |                 |
|              |                                                                                                                                                                                                         |                      | 129987468      | 129987488    | AACAGGACTGTGTCTGCCCTG   | RC          | 9.7  | 0.774 | 1447     | intron1               |                 |
|              |                                                                                                                                                                                                         |                      | 129989010      | 129989030    | TGAAACTGACCGTCCATACA    | FW          | 7.5  | 0.827 | 2989     | intron1               |                 |
|              |                                                                                                                                                                                                         |                      | 129989041      | 129989061    | AGCACTGCTGTCTCAGTTTTC   | RC          | 9.7  | 0.839 | 3020     | intron1               |                 |
|              |                                                                                                                                                                                                         |                      | 129989562      | 129989582    | CTAGCATGACCAAGCCTACTA   | FW          | 9.3  | 0.86  | 3541     | exon2                 |                 |
|              |                                                                                                                                                                                                         |                      | 129990060      | 129990080    | TCTACAGCGAGTCACTCTGG    | RC          | 7.7  | 0.821 | 4039     | intron2               |                 |
| <i>Fabp4</i> | fatty acid binding protein 4, adipocyte<br><br>NM_024406 chr3 10204342 10208576 -<br>chr3 A1 3 13.9 cM                                                                                                  | NM_024406            | 10204746       | 10204766     | TATATTGCTCATTCACTCCA    | RC          | 11.3 | 0.852 | 3830     | intron3               | 4.90            |
|              |                                                                                                                                                                                                         |                      | 10205795       | 10205815     | GCCGACTGACGGAGCTGGTT    | FW          | 6.4  | 0.843 | 2781     | intron2               |                 |
|              |                                                                                                                                                                                                         |                      | 10205915       | 10205935     | CCCCCTCACTCTGCATCAGC    | FW          | 8.8  | 0.797 | 2661     | intron2               |                 |
|              |                                                                                                                                                                                                         |                      | 10206647       | 10206667     | GAACATGCTGTTTCAACATTC   | RC          | 10.1 | 0.846 | 1929     | intron1               |                 |
|              |                                                                                                                                                                                                         |                      | 10206855       | 10206875     | TTAGAACCTTAGTCAACCTGT   | RC          | 9.1  | 0.793 | 1721     | intron1               |                 |
|              |                                                                                                                                                                                                         |                      | 10207421       | 10207441     | CTCAGTGCATAGTACTACCA    | RC          | 8.7  | 0.778 | 1155     | intron1               |                 |

| Gene symbol | Gene title/Transcript Info/Chromosomal location/ChIP-seq | RefSeq Transcript ID | ARE_start(mm9) | ARE_end(mm9) | ARE_seq                | Orientation | PWM  | MS    | Dist_TSS | Location   | FI (SFN vs PBS) |
|-------------|----------------------------------------------------------|----------------------|----------------|--------------|------------------------|-------------|------|-------|----------|------------|-----------------|
|             |                                                          |                      | 10207460       | 10207480     | CGATGGGCTAAGTCATGCTGA  | RC          | 15.6 | 0.92  | 1116     | intron1    |                 |
|             |                                                          |                      | 10208684       | 10208704     | TTTTCTCTGAGTCATGTTTT   | RC          | 10.5 | 0.808 | -108     | upstream   |                 |
|             |                                                          |                      | 10212003       | 10212023     | TTCCGATGACTAAGCACTGAC  | FW          | 14.3 | 0.927 | -3427    | upstream   |                 |
|             |                                                          |                      | 10212054       | 10212074     | AAAGAATGAGTAAGCCACAGA  | FW          | 10   | 0.829 | -3478    | upstream   |                 |
| <b>Fh1</b>  | <b>fumarate hydratase 1</b>                              | NM_010209            | 177551426      | 177551446    | CTTTAATGACTGAGCCATCTC  | FW          | 8.5  | 0.875 | 4340     | intron1    | 1.35            |
|             |                                                          |                      | 177553238      | 177553258    | caetCCACTGTGTCACTTGTA  | RC          | 7.2  | 0.762 | 2528     | intron1    |                 |
|             |                                                          |                      | 177553466      | 177553486    | aaegtgccttgagtcagtggt  | RC          | 9.7  | 0.771 | 2300     | intron1    |                 |
|             |                                                          |                      | 177556025      | 177556045    | GGTCCGTGAGACAGCCTAGAA  | FW          | 8.3  | 0.81  | -259     | upstream   |                 |
|             |                                                          |                      | 177557735      | 177557755    | agagaatgatgtgacccaaat  | FW          | 6.8  | 0.787 | -1969    | upstream   |                 |
|             |                                                          |                      | 177559963      | 177559983    | GCAGTCTGACACAGTAAACAT  | FW          | 10.5 | 0.808 | -4197    | upstream   |                 |
|             |                                                          |                      | 177560049      | 177560069    | acaccatgaccaaggcaagtc  | FW          | 9.2  | 0.768 | -4283    | upstream   |                 |
|             |                                                          |                      | 47099818       | 47099838     | catcactgactctgacttgg   | FW          | 13.4 | 0.898 | -5006    | upstream   | 1.50            |
|             |                                                          |                      | 47102836       | 47102856     | gagagatgactcagtgatcca  | FW          | 7.1  | 0.786 | -1988    | upstream   |                 |
|             |                                                          |                      | 47104119       | 47104139     | CGACTATGATACAGCAACACA  | FW          | 11.6 | 0.854 | -705     | upstream   |                 |
|             |                                                          |                      | 47104686       | 47104706     | CTCTCTGCTCTCATGTGGG    | RC          | 8.4  | 0.819 | -138     | upstream   |                 |
|             |                                                          |                      | 47105116       | 47105136     | AGAGCGTGAAGCAGCACCAGA  | FW          | 10.3 | 0.843 | 292      | exon1      |                 |
|             |                                                          |                      | 47105481       | 47105501     | TGGTGTGACTCCGGAGAGCT   | FW          | 8.2  | 0.781 | 657      | intron1    |                 |
|             |                                                          |                      | 47106617       | 47106637     | CCATGGTATGCAGCTGCCTT   | FW          | 7.4  | 0.812 | 1793     | intron1    |                 |
|             |                                                          |                      | 47106716       | 47106736     | TGCCCTTGACTCAGGCTGCC   | FW          | 7.6  | 0.787 | 1892     | intron1    |                 |
|             |                                                          |                      | 47106969       | 47106989     | gcactgtgataccgcactgtg  | FW          | 10   | 0.82  | 2145     | intron1    |                 |
|             |                                                          |                      | 47107015       | 47107035     | atggctctaaagtgcgacgag  | RC          | 9.8  | 0.823 | 2191     | intron1    |                 |
|             |                                                          |                      | 47107357       | 47107377     | GTCGGTAAATCAGCAGAGAG   | FW          | 7.4  | 0.766 | 2533     | intron1    |                 |
|             |                                                          |                      | 47108762       | 47108782     | TCAGATAACTCTGCATATTT   | FW          | 13.2 | 0.826 | 3938     | intron1    |                 |
|             |                                                          |                      | 75048984       | 75049004     | GGAAATGACAAGGCAAGATC   | FW          | 10.5 | 0.854 | -3141    | upstream   | 1.29            |
|             |                                                          |                      | 75049923       | 75049943     | CCTCATGCTGTGCAAGGTC    | RC          | 13.8 | 0.921 | -2202    | upstream   |                 |
|             |                                                          |                      | 75053568       | 75053588     | TCAGTCTCTTGTAAACCCAA   | RC          | 7.6  | 0.784 | 1443     | intron1    |                 |
|             |                                                          |                      | 75054546       | 75054566     | GAGAGTCTGTGTACCATAG    | RC          | 6.6  | 0.786 | 2421     | intron1    |                 |
|             |                                                          |                      | 75054954       | 75054974     | TCTCTGCTGCTCATGTCCA    | RC          | 8.5  | 0.826 | 2829     | intron1    |                 |
|             |                                                          |                      | 75055440       | 75055460     | CACACGGTGAAGTGAAGCTGT  | RC          | 10.9 | 0.824 | 3315     | intron1    |                 |
|             |                                                          |                      | 75056371       | 75056391     | ctcttgcttagctatccccca  | RC          | 13.3 | 0.896 | 4246     | intron1    |                 |
|             |                                                          |                      | 75056846       | 75056866     | cttattctgactcaccagttc  | RC          | 9.2  | 0.77  | 4721     | intron1    |                 |
|             |                                                          |                      | 29192441       | 29192461     | ggaccgtgatagctgtctc    | FW          | 8.9  | 0.807 | 2884     | downstream | 1.29            |
|             |                                                          |                      | 29192656       | 29192676     | aaagtggcctagtcaagccatc | RC          | 9.1  | 0.839 | 2669     | downstream |                 |
|             |                                                          |                      | 29195469       | 29195489     | CTCCGGTGAAGTGGCCATGTT  | FW          | 9.3  | 0.847 | -144     | upstream   |                 |
|             |                                                          |                      | 29198150       | 29198170     | atatgtgcacactcacacaca  | RC          | 7.8  | 0.801 | -2825    | upstream   |                 |
|             |                                                          |                      | 29198674       | 29198694     | ltaacttgacacagaaaaaga  | FW          | 8.2  | 0.795 | -3349    | upstream   |                 |
|             |                                                          |                      | 29198980       | 29199000     | caacatccttagtccaccagag | RC          | 7.9  | 0.797 | -3655    | upstream   |                 |
|             |                                                          |                      | 77444760       | 77444780     | tgggctgactgagcccatga   | FW          | 10.2 | 0.878 | -4637    | upstream   | 1.70            |
|             |                                                          |                      | 77445394       | 77445414     | acaccatgaccaagacaacac  | FW          | 7.8  | 0.762 | -4003    | upstream   |                 |
|             |                                                          |                      | 77445970       | 77445990     | ccatgccctggtcgaagattc  | RC          | 7.5  | 0.771 | -3427    | upstream   |                 |
|             |                                                          |                      | 77447078       | 77447098     | atattataactaaagcaaaaac | FW          | 8.8  | 0.821 | -2319    | upstream   |                 |
|             |                                                          |                      | 77449938       | 77449958     | CCAACCTGACTctgaaacccct | FW          | 7.9  | 0.785 | 541      | UTR5       |                 |
|             |                                                          |                      | 77450274       | 77450294     | CTGATTGCAAAAGTCAATTCCT | RC          | 8    | 0.857 | 877      | UTR5       |                 |
|             |                                                          |                      | 77450571       | 77450591     | ACAATGTGACAGAGCTTAACA  | FW          | 9    | 0.869 | 1174     | UTR5       |                 |
|             |                                                          |                      | 77450960       | 77450980     | GATCTAATGGGTCAAGCTGA   | RC          | 7    | 0.769 | 1563     | UTR5       |                 |
|             |                                                          |                      | 77451526       | 77451546     | AGAGGATGACTGGGAGTCTC   | FW          | 6.8  | 0.764 | 2129     | UTR5       |                 |
|             |                                                          |                      | 77452049       | 77452069     | TAGCAGTGACAGAGCCAGTG   | FW          | 11.2 | 0.867 | 2652     | UTR5       |                 |
|             |                                                          |                      | 126597854      | 126597874    | TGTGGCTGCAATGCCATCTC   | FW          | 7.8  | 0.81  | 4932     | exon3      | 4.75            |
|             |                                                          |                      | 126598295      | 126598315    | CACCAAGCTTTGCTCACTCAGG | RC          | 9.2  | 0.861 | 4491     | intron2    |                 |
|             |                                                          |                      | 126600774      | 126600794    | TGCAGGTTACTTGCAGCCCTG  | FW          | 8.8  | 0.792 | 2012     | UTR5       |                 |
|             |                                                          |                      | 126601364      | 126601384    | ggagcctgatagctgtctc    | FW          | 6.8  | 0.789 | 1422     | intron1    |                 |
|             |                                                          |                      | 126601627      | 126601647    | aggatggcctagtcaagtcac  | RC          | 7.3  | 0.832 | 1159     | intron1    |                 |
|             |                                                          |                      | 126602618      | 126602638    | TAAGTCCAGAGTCACTCTG    | RC          | 8.8  | 0.779 | 168      | intron1    |                 |
|             |                                                          |                      | 126602981      | 126603001    | GAAGTGTCTTTCACACCGGA   | RC          | 12.1 | 0.853 | -195     | upstream   |                 |
|             |                                                          |                      | 126603035      | 126603055    | AGGTGGCTGTATCAGGCGCA   | RC          | 8    | 0.801 | -249     | upstream   |                 |
|             |                                                          |                      | 126604049      | 126604069    | accattgcagattcaaacTTT  | RC          | 9    | 0.826 | -1263    | upstream   |                 |
|             |                                                          |                      | 126604847      | 126604867    | TCTTACTGAGAAAGCATTTGT  | FW          | 9.6  | 0.822 | -2061    | upstream   |                 |
|             |                                                          |                      | 126605698      | 126605718    | GGAACAGCTGGGTCAAGAAA   | RC          | 7.2  | 0.858 | -2912    | upstream   |                 |
|             |                                                          |                      | 126606221      | 126606241    | cattagtgacttggcaaatgt  | FW          | 11.8 | 0.876 | -3435    | upstream   |                 |
|             |                                                          |                      | 126606897      | 126606917    | CATCTCTGACTAGGCAATTAG  | FW          | 11.7 | 0.876 | -4111    | upstream   |                 |
|             |                                                          |                      | 99543423       | 99543443     | TAACCTGCTGCTCAAGTGTCC  | RC          | 12   | 0.851 | -4600    | upstream   | 2.19            |
|             |                                                          |                      | 99544046       | 99544066     | CAGAATGCAAAAGCCCTGCG   | FW          | 8.2  | 0.845 | -3977    | upstream   |                 |
|             |                                                          |                      | 99544199       | 99544219     | CCACAGTGCACTGGACAGCC   | FW          | 10   | 0.777 | -3824    | upstream   |                 |
|             |                                                          |                      | 99545835       | 99545855     | AGCGGTGACTGAGTGGCAT    | FW          | 9    | 0.876 | -2188    | upstream   |                 |
|             |                                                          |                      | 99546627       | 99546647     | CCAGAGTGAAGTGGAAACCCG  | FW          | 7.5  | 0.773 | -1396    | upstream   |                 |
|             |                                                          |                      | 99551593       | 99551613     | aaaggtaccaggtgagtggtg  | RC          | 8.6  | 0.765 | 3570     | intron5    |                 |
|             |                                                          |                      | 99551784       | 99551804     | caacagtggagaagcagaggg  | FW          | 9.4  | 0.827 | 3761     | intron5    |                 |
|             |                                                          |                      | 77896482       | 77896502     | CCGGATGACTTAGCAAAAAA   | FW          | 16.6 | 0.937 | 59       | UTR5       | 1.78            |
|             |                                                          |                      | 77895394       | 77895414     | ttatgagctaaagtcacactct | RC          | 9.2  | 0.882 | 1147     | intron1    |                 |
|             |                                                          |                      | 77895517       | 77895537     | aggactcccaagtcACCGACA  | RC          | 7.8  | 0.764 | 1024     | intron1    |                 |



| Gene symbol   | Gene title/Transcript Info/Chromosomal location/ChIP-seq                                                                                                                                                                                                                                                                                                                                                                         | RefSeq Transcript ID      | ARE_start(mm9) | ARE_end(mm9) | ARE_seq                 | Orientation | PWM      | MS    | Dist_TSS | Location              | FI (SFN vs PBS) |
|---------------|----------------------------------------------------------------------------------------------------------------------------------------------------------------------------------------------------------------------------------------------------------------------------------------------------------------------------------------------------------------------------------------------------------------------------------|---------------------------|----------------|--------------|-------------------------|-------------|----------|-------|----------|-----------------------|-----------------|
|               | chr12 C3 12 36.0 cM<br>1-Ese14 Mafk chr12:77896350-77896694                                                                                                                                                                                                                                                                                                                                                                      |                           | 77897755       | 77897775     | CAAGCTACAGAGTCAGAGGGA   | RC          | 9.2      | 0.786 | -1214    | upstream              |                 |
|               |                                                                                                                                                                                                                                                                                                                                                                                                                                  |                           | 77897987       | 77898007     | CTTACTGCTGAGTAAACCAT    | RC          | 8.8      | 0.827 | -1446    | upstream              |                 |
|               |                                                                                                                                                                                                                                                                                                                                                                                                                                  |                           | 77898127       | 77898147     | GCTTGTCTTAGTCATAGTAG    | RC          | 10.7     | 0.82  | -1586    | upstream              |                 |
|               |                                                                                                                                                                                                                                                                                                                                                                                                                                  |                           | 77898422       | 77898442     | TTCTTGTCTGTTTCACTGCTT   | RC          | 10.1     | 0.837 | -1881    | upstream              |                 |
|               |                                                                                                                                                                                                                                                                                                                                                                                                                                  |                           | 77898531       | 77898551     | CCATGGCTATCTCATGGGAT    | RC          | 6.9      | 0.788 | -1990    | upstream              |                 |
|               |                                                                                                                                                                                                                                                                                                                                                                                                                                  |                           | 77899147       | 77899167     | GGCCAATGACACAGCCCAAGC   | FW          | 12.7     | 0.886 | -2606    | upstream              |                 |
|               |                                                                                                                                                                                                                                                                                                                                                                                                                                  |                           | 77899271       | 77899291     | CACGGTACAGAGTCACAGCCC   | RC          | 7.9      | 0.78  | -2730    | upstream              |                 |
|               |                                                                                                                                                                                                                                                                                                                                                                                                                                  |                           | 77899598       | 77899618     | TTGTTTGTAAAGTCAGGGAGA   | RC          | 15.1     | 0.931 | -3057    | upstream              |                 |
|               |                                                                                                                                                                                                                                                                                                                                                                                                                                  |                           | 77899722       | 77899742     | TTGAATGCTCGGTCAAGTGCCT  | RC          | 8.7      | 0.87  | -3181    | upstream              |                 |
|               |                                                                                                                                                                                                                                                                                                                                                                                                                                  |                           | 77900737       | 77900757     | CCTTAGGCAGAAACAGGAAGG   | RC          | 6.5      | 0.787 | -4196    | upstream              |                 |
| <b>Gstm4</b>  | glutathione S-transferase, mu 4<br>NM_001160411 chr3:107843325-107847777 - chr3:F2.3 3<br>1-Ch12 Mafk chr3:107847634-107848831 Ese14 Mafk chr3:107847700-107848385 Mel Mafk chr3:107847629-107848448<br>2-Ch12 Mafk chr3:107849799-107850908 Ese14 Mafk chr3:107850198-107850495 Mel Mafk chr3:107850032-107851211<br>3-Ch12 Mafk chr3:107849799-107850908 Ese14 Mafk chr3:107850198-107850495 Mel Mafk chr3:107850032-107851211 | NM_001160411<br>NM_026764 | 107847966      | 107847986    | AAGTGCTGATTAGCACTTCA    | FW          | 9.2      | 0.839 | -189     | <sup>1</sup> upstream | 1.30            |
|               |                                                                                                                                                                                                                                                                                                                                                                                                                                  |                           | 107850337      | 107850357    | TACCTGTGACTCAGCATCTTC   | FW          | 16.5     | 0.952 | -2560    | <sup>2</sup> upstream |                 |
|               |                                                                                                                                                                                                                                                                                                                                                                                                                                  |                           | 107850404      | 107850424    | gcaagatgactcaagcaataa   | FW          | 19       | 0.972 | -2627    | <sup>3</sup> upstream |                 |
|               |                                                                                                                                                                                                                                                                                                                                                                                                                                  |                           | 107843705      | 107843725    | CCCGGTCACAGGCGCCAC      | FW          | 6.9      | 0.775 | 4069     | UTR3                  |                 |
|               |                                                                                                                                                                                                                                                                                                                                                                                                                                  |                           | 107844134      | 107844154    | CTTCTGCCAGTCAAGGCTC     | RC          | 9.1      | 0.865 | 3640     | UTR3                  |                 |
|               |                                                                                                                                                                                                                                                                                                                                                                                                                                  |                           | 107844448      | 107844468    | GCACACTGACTATGAATCTGT   | FW          | 8.5      | 0.776 | 3326     | intron7               |                 |
|               |                                                                                                                                                                                                                                                                                                                                                                                                                                  |                           | 107844512      | 107844532    | ATCCAGTGACTCTGCAAAACC   | FW          | 12.4     | 0.898 | 3262     | intron7               |                 |
|               |                                                                                                                                                                                                                                                                                                                                                                                                                                  |                           | 107845211      | 107845231    | GAAGAAATGACAAATGCTCAACT | FW          | 8.9      | 0.825 | 2563     | intron6               |                 |
|               |                                                                                                                                                                                                                                                                                                                                                                                                                                  |                           | 107846067      | 107846087    | GATAGTTCAGTGCATGGGGA    | RC          | 11.7     | 0.779 | 1707     | intron5               |                 |
|               |                                                                                                                                                                                                                                                                                                                                                                                                                                  |                           | 107849526      | 107849546    | TATCCTTGAATAAGCGTGATT   | FW          | 7.8      | 0.815 | -1749    | upstream              |                 |
| 107852749     | 107852769                                                                                                                                                                                                                                                                                                                                                                                                                        | ACAATAACTAAGTCACTTAGC     | RC             | 7.1          | 0.777                   | -4972       | upstream |       |          |                       |                 |
| <b>Gsto1</b>  | glutathione S-transferase omega 1<br>NM_010362 chr19:47929462-47939278 + chr19:D1 19<br>1-Ch12 Mafk chr19:47932488-47932937                                                                                                                                                                                                                                                                                                      | NM_010362                 | 47932619       | 47932639     | CTAGGCTGACTCAGCGTCC     | FW          | 12.2     | 0.911 | 3157     | <sup>1</sup> intron3  | 2.22            |
|               |                                                                                                                                                                                                                                                                                                                                                                                                                                  |                           | 47926086       | 47926106     | CTTCATCCTGTGTCACAGCAG   | RC          | 8.3      | 0.793 | -3376    | upstream              |                 |
|               |                                                                                                                                                                                                                                                                                                                                                                                                                                  |                           | 47926736       | 47926756     | lggatagctgagtcactgccc   | RC          | 13.1     | 0.916 | -2726    | upstream              |                 |
|               |                                                                                                                                                                                                                                                                                                                                                                                                                                  |                           | 47926818       | 47926838     | lagatagctgagttacacca    | RC          | 9.3      | 0.811 | -2644    | upstream              |                 |
|               |                                                                                                                                                                                                                                                                                                                                                                                                                                  |                           | 47927743       | 47927763     | GCTATGGCTTGGTCAAGCTGT   | RC          | 11       | 0.871 | -1719    | upstream              |                 |
|               |                                                                                                                                                                                                                                                                                                                                                                                                                                  |                           | 47928490       | 47928510     | ATGTTTGTAGTTCATCCACA    | RC          | 7.8      | 0.806 | -972     | upstream              |                 |
|               |                                                                                                                                                                                                                                                                                                                                                                                                                                  |                           | 47929382       | 47929402     | TTAAGCTCACACAGCATCAGG   | FW          | 9.2      | 0.816 | -80      | upstream              |                 |
|               |                                                                                                                                                                                                                                                                                                                                                                                                                                  |                           | 47930171       | 47930191     | CCGTGTGCACAGTCATTAGG    | RC          | 9.3      | 0.869 | 709      | intron2               |                 |
|               |                                                                                                                                                                                                                                                                                                                                                                                                                                  |                           | 47931890       | 47931910     | AATGAGCTTTGTCAAGCTGA    | RC          | 13.7     | 0.885 | 2428     | intron2               |                 |
|               |                                                                                                                                                                                                                                                                                                                                                                                                                                  |                           | 30477803       | 30477823     | TGGCACTGAATCAGCTCCTGT   | FW          | 9.8      | 0.834 | -3989    | upstream              |                 |
| <b>Hadhb</b>  | hydroxyacyl-Coenzyme A dehydrogenase 3-ketoacyl-Coenzyme A thiolase enoyl-Coenzyme A hydratase (trifunctional protein), beta subunit<br>NM_145558 chr5:30481792-30511133 + chr5:B1 5                                                                                                                                                                                                                                             | NM_145558                 | 30478290       | 30478310     | CTCAGGCGAGGTTATTATCT    | RC          | 6.7      | 0.767 | -3502    | upstream              | 1.50            |
|               |                                                                                                                                                                                                                                                                                                                                                                                                                                  |                           | 30479935       | 30479955     | gaaagggcaaaagcaacagct   | RC          | 6.9      | 0.83  | -1857    | upstream              |                 |
|               |                                                                                                                                                                                                                                                                                                                                                                                                                                  |                           | 30480394       | 30480414     | TAAAGGTGAATTAGCACCCAG   | FW          | 10.3     | 0.853 | -1398    | upstream              |                 |
|               |                                                                                                                                                                                                                                                                                                                                                                                                                                  |                           | 30481093       | 30481113     | AACTTAGCGGTGTCAAGGCCA   | RC          | 9.8      | 0.836 | -699     | upstream              |                 |
|               |                                                                                                                                                                                                                                                                                                                                                                                                                                  |                           | 30481216       | 30481236     | AGAGCCTGACACTGCCGAGGC   | FW          | 10       | 0.84  | -576     | upstream              |                 |
|               |                                                                                                                                                                                                                                                                                                                                                                                                                                  |                           | 30482143       | 30482163     | CGCTGGCTTGTGTCAAGCGG    | RC          | 11.1     | 0.882 | 351      | intron1               |                 |
|               |                                                                                                                                                                                                                                                                                                                                                                                                                                  |                           | 30482272       | 30482292     | CAGTCTGCTTGGTATCCAGG    | RC          | 7.3      | 0.784 | 480      | intron1               |                 |
|               |                                                                                                                                                                                                                                                                                                                                                                                                                                  |                           | 30483878       | 30483898     | gaactgctaatcaagctgag    | RC          | 10.8     | 0.835 | 2086     | intron1               |                 |
|               |                                                                                                                                                                                                                                                                                                                                                                                                                                  |                           | 30486312       | 30486332     | ttccaagctcaagtcacatgag  | RC          | 6.9      | 0.874 | 4052     | intron1               |                 |
|               |                                                                                                                                                                                                                                                                                                                                                                                                                                  |                           | 52586955       | 52586975     | GCACATTTAATAAGCAAATTT   | FW          | 9.9      | 0.773 | 3339     | intron1               |                 |
| <b>Hibadh</b> | 3-hydroxyisobutyrate dehydrogenase<br>NM_145567 chr6:52496223-52590294 - chr6:B3 6 chr6:B3                                                                                                                                                                                                                                                                                                                                       | NM_145567                 | 52589633       | 52589653     | CCACTTTAGGACGACCAACT    | FW          | 9.2      | 0.844 | 661      | intron1               | 1.27            |
|               |                                                                                                                                                                                                                                                                                                                                                                                                                                  |                           | 52590600       | 52590620     | GCAACTGCCTCTCACTGSGC    | RC          | 6.8      | 0.779 | -306     | upstream              |                 |
|               |                                                                                                                                                                                                                                                                                                                                                                                                                                  |                           | 52592619       | 52592639     | CAAAGGGCTAAGTCATAGTTT   | RC          | 14.7     | 0.914 | -2325    | upstream              |                 |
|               |                                                                                                                                                                                                                                                                                                                                                                                                                                  |                           | 52592854       | 52592874     | gaactgctatgtaaaactagg   | RC          | 6.6      | 0.782 | -2560    | upstream              |                 |
|               |                                                                                                                                                                                                                                                                                                                                                                                                                                  |                           | 52594273       | 52594293     | GCCTTCTGATTCAAGCTGTATG  | FW          | 8.6      | 0.833 | -3979    | upstream              |                 |
|               |                                                                                                                                                                                                                                                                                                                                                                                                                                  |                           | 52899711       | 52899731     | ccacaatgacacagtctctct   | FW          | 9.4      | 0.787 | -2170    | upstream              |                 |
|               |                                                                                                                                                                                                                                                                                                                                                                                                                                  |                           | 52900819       | 52900839     | gatgctgacaaagccatcat    | FW          | 7.5      | 0.809 | -1062    | upstream              |                 |
|               |                                                                                                                                                                                                                                                                                                                                                                                                                                  |                           | 52901056       | 52901076     | aggctctgacagagctctct    | FW          | 6.9      | 0.844 | -825     | upstream              |                 |
|               |                                                                                                                                                                                                                                                                                                                                                                                                                                  |                           | 52901078       | 52901098     | gagatagctgatacaggcgcc   | RC          | 7.6      | 0.8   | -803     | upstream              |                 |
|               |                                                                                                                                                                                                                                                                                                                                                                                                                                  |                           | 52902139       | 52902159     | GTCCTCTGACTTTGCTCTTTT   | FW          | 7.3      | 0.834 | 258      | intron1               |                 |
| <b>Hibch</b>  | 3-hydroxyisobutyryl-Coenzyme A hydrolase<br>NM_146108 chr1:52901881-52977830 + chr1:C1.1 1                                                                                                                                                                                                                                                                                                                                       | NM_146108                 | 52904805       | 52904825     | lgtgaaatgatgacagcagaaa  | FW          | 7.8      | 0.822 | 2924     | intron1               | 1.45            |
|               |                                                                                                                                                                                                                                                                                                                                                                                                                                  |                           | 52905746       | 52905766     | TGAGGCTTACTATGCATCTTT   | FW          | 10.1     | 0.789 | 3865     | intron1               |                 |
|               |                                                                                                                                                                                                                                                                                                                                                                                                                                  |                           | 52905856       | 52905876     | GGGACTGCTGGGTGAAGGAGA   | RC          | 7        | 0.801 | 3975     | intron1               |                 |
|               |                                                                                                                                                                                                                                                                                                                                                                                                                                  |                           | 52906540       | 52906560     | AATACAGCTGTGTGATTTGT    | RC          | 10       | 0.8   | 4659     | intron1               |                 |
|               |                                                                                                                                                                                                                                                                                                                                                                                                                                  |                           | 82722158       | 82722178     | CGTGGTCCCACTCAGTCACC    | RC          | 6.9      | 0.85  | 2290     | intron1               |                 |
|               |                                                                                                                                                                                                                                                                                                                                                                                                                                  |                           | 82722187       | 82722207     | GGATGGCACAGTCACCTGCA    | RC          | 7.6      | 0.836 | 2261     | intron1               |                 |
|               |                                                                                                                                                                                                                                                                                                                                                                                                                                  |                           | 82723935       | 82723955     | GCTCCGTGAATAAGCAGGCGA   | FW          | 10.9     | 0.859 | 513      | exon1                 |                 |
|               |                                                                                                                                                                                                                                                                                                                                                                                                                                  |                           | 82724713       | 82724733     | GCCACCOCGCGTCAAGGCTCA   | RC          | 9.3      | 0.836 | -265     | upstream              |                 |
|               |                                                                                                                                                                                                                                                                                                                                                                                                                                  |                           | 82725894       | 82725914     | TTAGTCTAATCTAGCAAATCA   | FW          | 8        | 0.815 | -1446    | upstream              |                 |
|               |                                                                                                                                                                                                                                                                                                                                                                                                                                  |                           | 82727009       | 82727029     | AGTAGATGATTAGCAATGAC    | FW          | 8.7      | 0.838 | -2561    | upstream              |                 |
| 82728416      | 82728436                                                                                                                                                                                                                                                                                                                                                                                                                         | GAAAAATCAATCAGCACATGT     | FW             | 8.7          | 0.775                   | -3968       | upstream |       |          |                       |                 |
| <b>Hk2</b>    | hexokinase 2<br>NM_013820 chr6:82675020-82724448 - chr6:C3 6 34.5 cM                                                                                                                                                                                                                                                                                                                                                             | NM_013820                 | 52586498       | 52586518     | CTCAGGCTCTGTCACTGATA    | RC          | 10.1     | 0.862 | -4140    | upstream              | 3.75            |
|               |                                                                                                                                                                                                                                                                                                                                                                                                                                  |                           | 52588307       | 52588327     | lgcagagctatgtaagctgag   | RC          | 7.3      | 0.777 | -2331    | upstream              |                 |
|               |                                                                                                                                                                                                                                                                                                                                                                                                                                  |                           | 52588355       | 52588375     | CCGGATGACACAGAAAGCCG    | FW          | 9.5      | 0.8   | -2283    | upstream              |                 |
|               |                                                                                                                                                                                                                                                                                                                                                                                                                                  |                           | 52589579       | 52589599     | ACAAAGTGATAGAGCAACAGA   | FW          | 9.3      | 0.831 | -1059    | upstream              |                 |
|               |                                                                                                                                                                                                                                                                                                                                                                                                                                  |                           | 52590867       | 52590887     | CAGTGGTGACCCAGGAGTTGA   | FW          | 9.7      | 0.792 | 229      | exon1                 |                 |
|               |                                                                                                                                                                                                                                                                                                                                                                                                                                  |                           | 52591600       | 52591620     | AGACGGTGAATCTGGTGAATA   | FW          | 9.5      | 0.771 | 962      | exon1                 |                 |
|               |                                                                                                                                                                                                                                                                                                                                                                                                                                  |                           | 52591912       | 52591932     | TGAGGATGACTCAGAGAAAGA   | FW          | 14       | 0.845 | 1274     | exon1                 |                 |
|               |                                                                                                                                                                                                                                                                                                                                                                                                                                  |                           | 52592272       | 52592292     | GCCAGGCGAGGTCACAGAGA    | RC          | 6.4      | 0.828 | 1634     | exon1                 |                 |

| Gene symbol    | Gene title/Transcript Info/Chromosomal location/ChIP-seq                                                            | RefSeq Transcript ID       | ARE_start(mm9) | ARE_end(mm9)                                                                                                                                                                                                                              | ARE_seq                | Orientation | PWM       | MS                      | Dist_TSS | Location   | FI (SFN vs PBS) |       |          |                       |      |
|----------------|---------------------------------------------------------------------------------------------------------------------|----------------------------|----------------|-------------------------------------------------------------------------------------------------------------------------------------------------------------------------------------------------------------------------------------------|------------------------|-------------|-----------|-------------------------|----------|------------|-----------------|-------|----------|-----------------------|------|
|                |                                                                                                                     |                            | 52593479       | 52593499                                                                                                                                                                                                                                  | TGTCCTGACTCAGTCCCTTG   | FW          | 9.2       | 0.794                   | 2841     | intron3    |                 |       |          |                       |      |
|                |                                                                                                                     |                            | 52594516       | 52594536                                                                                                                                                                                                                                  | ctcagtcgagagtcagagagca | RC          | 12.7      | 0.895                   | 3878     | downstream |                 |       |          |                       |      |
|                |                                                                                                                     |                            | 52595533       | 52595553                                                                                                                                                                                                                                  | CCAAATCACTAGCAGAGTA    | FW          | 7.6       | 0.792                   | 4895     | downstream |                 |       |          |                       |      |
|                |                                                                                                                     |                            | 140976001      | 140976021                                                                                                                                                                                                                                 | CGGCAGTGACTCAGGCCCTCA  | FW          | 9.3       | 0.798                   | -692     | upstream   |                 |       |          |                       |      |
|                |                                                                                                                     |                            | 140976201      | 140976221                                                                                                                                                                                                                                 | GGGGTTGACAGAGCCCTTA    | FW          | 7.1       | 0.844                   | -492     | upstream   |                 |       |          |                       |      |
| <b>Hspb7</b>   | heat shock protein family, member 7 (cardiovascular)<br>NM_013868 chr4 140976693 140981225 + chr4 E1 4              | NM_013868                  | 140976420      | 140976440                                                                                                                                                                                                                                 | AAACTGTCACCTGCGCAGGTG  | FW          | 7.5       | 0.776                   | -273     | upstream   | 2.85            |       |          |                       |      |
|                |                                                                                                                     |                            | 140977160      | 140977180                                                                                                                                                                                                                                 | CCCTGGGCTTTCTCAGCCTTC  | RC          | 7.1       | 0.789                   | 467      | UTR5       |                 |       |          |                       |      |
|                |                                                                                                                     |                            | 140979090      | 140979110                                                                                                                                                                                                                                 | CCTGAAGCTGAGTCACAACCA  | RC          | 11.6      | 0.904                   | 2397     | intron2    |                 |       |          |                       |      |
|                |                                                                                                                     |                            | 140979358      | 140979378                                                                                                                                                                                                                                 | CAAGAGTGACTCAGCCAGCCA  | FW          | 13.6      | 0.92                    | 2665     | intron2    |                 |       |          |                       |      |
|                |                                                                                                                     |                            | 140979465      | 140979485                                                                                                                                                                                                                                 | GGCACAGCTGTGTACTCTCC   | RC          | 9.6       | 0.871                   | 2772     | intron2    |                 |       |          |                       |      |
|                |                                                                                                                     |                            | 140979801      | 140979821                                                                                                                                                                                                                                 | CTGATGGCACAGTCATGAACA  | RC          | 8.4       | 0.839                   | 3108     | exon3      |                 |       |          |                       |      |
|                |                                                                                                                     |                            | 140981061      | 140981081                                                                                                                                                                                                                                 | GGGCTCTGACTCAGTCTCTGC  | FW          | 6.5       | 0.781                   | 4368     | UTR3       |                 |       |          |                       |      |
|                |                                                                                                                     |                            | 140981482      | 140981502                                                                                                                                                                                                                                 | TGTTCTGCACCTGTCCACAGCC | RC          | 6.7       | 0.831                   | 4789     | downstream |                 |       |          |                       |      |
|                |                                                                                                                     |                            | <b>ldh3a</b>   | isocitrate dehydrogenase 3 (NAD+) alpha<br>NM_029573 chr9 54434317 54452469 + chr9 A5.3 9<br>1-Mel Mafk chr9:54430927-54432386<br>2-Mel Mafk chr9:54430927-54432386<br>3-Ch12 Mafk chr9:54432007-54432195 Mel Mafk chr9:54430927-54432386 | NM_029573              | 54431088    | 54431108  | AAGGGTGCTTAATCAACAGGAG  | RC       | 9          |                 | 0.845 | -3229    | <sup>1</sup> upstream | 1.56 |
|                |                                                                                                                     |                            |                |                                                                                                                                                                                                                                           |                        | 54431868    | 54431888  | gctaactgactcagtagtggct  | FW       | 6.5        |                 | 0.806 | -2449    | <sup>2</sup> upstream |      |
|                |                                                                                                                     |                            |                |                                                                                                                                                                                                                                           |                        | 54432154    | 54432174  | ttttctctgactcagcagctttg | FW       | 14.9       |                 | 0.942 | -2163    | <sup>3</sup> upstream |      |
|                |                                                                                                                     |                            |                |                                                                                                                                                                                                                                           |                        | 54429695    | 54429715  | gcactgtgagcagcagcagcagc | FW       | 10.1       |                 | 0.851 | -4622    | upstream              |      |
| 54430525       | 54430545                                                                                                            | TTGCTATGACAAGAATTTAA       |                |                                                                                                                                                                                                                                           |                        | FW          | 8         | 0.779                   | -3792    | upstream   |                 |       |          |                       |      |
| 54430596       | 54430616                                                                                                            | gcaccatgaccaaggcaagctc     |                |                                                                                                                                                                                                                                           |                        | FW          | 9.1       | 0.768                   | -3721    | upstream   |                 |       |          |                       |      |
| 54435142       | 54435162                                                                                                            | CCAAGGTCACCTAGCTAATTA      |                |                                                                                                                                                                                                                                           |                        | FW          | 9.6       | 0.808                   | 825      | intron1    |                 |       |          |                       |      |
| 54435340       | 54435360                                                                                                            | aaatcctgacaaaagcattgg      |                |                                                                                                                                                                                                                                           |                        | FW          | 12.3      | 0.873                   | 1023     | intron1    |                 |       |          |                       |      |
| 54435514       | 54435534                                                                                                            | TGGCAGTGATCAAGCAGACAG      |                |                                                                                                                                                                                                                                           |                        | FW          | 8.9       | 0.816                   | 1197     | intron1    |                 |       |          |                       |      |
| 54437791       | 54437811                                                                                                            | CATTATTACTTAGCATTCCT       |                |                                                                                                                                                                                                                                           |                        | FW          | 7.4       | 0.808                   | 3474     | intron2    |                 |       |          |                       |      |
| 54437926       | 54437946                                                                                                            | CATCTGGCTATGTAAGCTTGT      |                |                                                                                                                                                                                                                                           |                        | RC          | 7.5       | 0.769                   | 3609     | intron2    |                 |       |          |                       |      |
| 54439163       | 54439183                                                                                                            | AAGGGCTGATTCAGCCATATA      |                |                                                                                                                                                                                                                                           |                        | FW          | 11        | 0.838                   | 4846     | intron2    |                 |       |          |                       |      |
| <b>Ifi272a</b> | interferon, alpha-inducible protein 27 like 2A<br>NM_029803 chr12 104680375 104681890 - chr12 E 12                  | NM_029803                  | 104677582      | 104677602                                                                                                                                                                                                                                 | GCCCACTGCATAGTCCCTCT   | FW          | 8.8       | 0.856                   | 4308     | downstream | 5.07            |       |          |                       |      |
|                |                                                                                                                     |                            | 104681358      | 104681378                                                                                                                                                                                                                                 | AGGATGTGACAGAGCCGTGGT  | FW          | 8.2       | 0.851                   | 532      | intron2    |                 |       |          |                       |      |
|                |                                                                                                                     |                            | 104683618      | 104683638                                                                                                                                                                                                                                 | AAGCCCTGAATGTGCAGCATT  | FW          | 7.9       | 0.799                   | -1728    | upstream   |                 |       |          |                       |      |
|                |                                                                                                                     |                            | 104684317      | 104684337                                                                                                                                                                                                                                 | TTTCTgtctcagtcaggtctc  | RC          | 7.2       | 0.777                   | -2427    | upstream   |                 |       |          |                       |      |
|                |                                                                                                                     |                            | 104684959      | 104684979                                                                                                                                                                                                                                 | gtatgtgcatcttcacagaga  | RC          | 8.5       | 0.79                    | -3069    | upstream   |                 |       |          |                       |      |
|                |                                                                                                                     |                            | 104685779      | 104685799                                                                                                                                                                                                                                 | TATTTTCTGTGTCATCCATA   | RC          | 11.4      | 0.803                   | -3889    | upstream   |                 |       |          |                       |      |
|                |                                                                                                                     |                            | 104686267      | 104686287                                                                                                                                                                                                                                 | ATATTAACCTAGTCATCTGGC  | RC          | 7.8       | 0.778                   | -4377    | upstream   |                 |       |          |                       |      |
|                |                                                                                                                     |                            | <b>Kcnd2</b>   | potassium voltage-gated channel, Shal-related family, member 2<br>NM_019697 chr6 21166108 21679805 + chr6 A2-A3.1 6 7.2 cM                                                                                                                | NM_019697              | 21161781    | 21161801  | ccacaatgaggtagcaatagg   | FW       | 11.6       |                 | 0.841 | -4327    | upstream              | 2.55 |
| 21162334       | 21162354                                                                                                            | AGACATACTGGGTCACTGTGT      |                |                                                                                                                                                                                                                                           |                        | RC          | 10.2      | 0.811                   | -3774    | upstream   |                 |       |          |                       |      |
| 21163441       | 21163461                                                                                                            | CACGGTAACTAAGCAGAGAG       |                |                                                                                                                                                                                                                                           |                        | FW          | 9.6       | 0.816                   | -2667    | upstream   |                 |       |          |                       |      |
| 21165528       | 21165548                                                                                                            | TAACGTGCACACTGCACTGA       |                |                                                                                                                                                                                                                                           |                        | FW          | 9.3       | 0.782                   | -580     | upstream   |                 |       |          |                       |      |
| 21166882       | 21166902                                                                                                            | TTGCCCTCAAGTCATCGGA        |                |                                                                                                                                                                                                                                           |                        | RC          | 7.2       | 0.778                   | 774      | exon1      |                 |       |          |                       |      |
| 21166996       | 21167016                                                                                                            | ATACCCGCTGTGTCATGATCT      |                |                                                                                                                                                                                                                                           |                        | RC          | 9.4       | 0.777                   | 888      | exon1      |                 |       |          |                       |      |
| 21167068       | 21167088                                                                                                            | TCGTGCGCAGTGTGATGAGTA      |                |                                                                                                                                                                                                                                           |                        | RC          | 9.8       | 0.836                   | 960      | exon1      |                 |       |          |                       |      |
| 21169150       | 21169170                                                                                                            | AATGGGGCTGTGTTACTATTA      |                |                                                                                                                                                                                                                                           |                        | RC          | 9.6       | 0.793                   | 3042     | intron1    |                 |       |          |                       |      |
| 21170045       | 21170065                                                                                                            | ATATTAGCTTTTTCATAGATT      |                |                                                                                                                                                                                                                                           |                        | RC          | 7         | 0.789                   | 3937     | intron1    |                 |       |          |                       |      |
| <b>Kcne3</b>   | potassium voltage-gated channel, Isk-related subfamily, gene 3<br>NM_001190869 chr7 107325179 107333379 + chr7 7 F1 | 190870///NM_001190871///NM |                |                                                                                                                                                                                                                                           |                        | 107320228   | 107320248 | GAGTGCACTGAGTCATAGATC   | RC       | 8          | 0.793           | -4951 | upstream | 2.86                  |      |
|                |                                                                                                                     |                            |                |                                                                                                                                                                                                                                           |                        | 107321445   | 107321465 | GGAAACCTGAGTCAGGACCA    | RC       | 7.9        | 0.786           | -3734 | upstream |                       |      |
|                |                                                                                                                     |                            |                |                                                                                                                                                                                                                                           |                        | 107322512   | 107322532 | acatgagctatctcatacaca   | RC       | 6.4        | 0.782           | -2667 | upstream |                       |      |
|                |                                                                                                                     |                            | 107324009      | 107324029                                                                                                                                                                                                                                 | GAAAGTGTGTGTTAAAAGGG   | RC          | 8.1       | 0.805                   | -1170    | upstream   |                 |       |          |                       |      |
|                |                                                                                                                     |                            | 107324309      | 107324329                                                                                                                                                                                                                                 | AGCCAGTGAGACAGCTCAGCA  | FW          | 7.1       | 0.804                   | -870     | upstream   |                 |       |          |                       |      |
|                |                                                                                                                     |                            | 107325429      | 107325449                                                                                                                                                                                                                                 | ACCACCTGACAGGGCTAGTTT  | FW          | 7.8       | 0.814                   | 250      | intron1    |                 |       |          |                       |      |
|                |                                                                                                                     |                            | 107330561      | 107330581                                                                                                                                                                                                                                 | TCTTCATGACAAAGCCATGCT  | FW          | 11.9      | 0.873                   | 3369     | intron1    |                 |       |          |                       |      |
|                |                                                                                                                     |                            | 107330827      | 107330847                                                                                                                                                                                                                                 | TTTCTATGAGACTGCAAACTA  | FW          | 7.4       | 0.794                   | 3635     | intron1    |                 |       |          |                       |      |
| <b>Krt15</b>   | keratin 15<br>NM_008469 chr11 99993072 99997263 - chr11 D 11 58.5 cM                                                | NM_008469                  | 99994997       | 99995017                                                                                                                                                                                                                                  | CATACTGCTCCCTCATCTCTG  | RC          | 6.9       | 0.805                   | 2266     | exon4      | 4.40            |       |          |                       |      |
|                |                                                                                                                     |                            | 99996157       | 99996177                                                                                                                                                                                                                                  | ATGCCTTGACAGAGCCCTTGG  | FW          | 7.7       | 0.851                   | 1106     | intron1    |                 |       |          |                       |      |
|                |                                                                                                                     |                            | 99996860       | 99996880                                                                                                                                                                                                                                  | GGTTCGATGGTCACTTCTCT   | RC          | 9         | 0.845                   | 403      | exon1      |                 |       |          |                       |      |
|                |                                                                                                                     |                            | 99998143       | 99998163                                                                                                                                                                                                                                  | CCATTGGCTTTGCACTGCTC   | RC          | 7.6       | 0.831                   | -880     | upstream   |                 |       |          |                       |      |
|                |                                                                                                                     |                            | 99998726       | 99998746                                                                                                                                                                                                                                  | CATGATTGACAAGTATTTTT   | FW          | 6.6       | 0.767                   | -1463    | upstream   |                 |       |          |                       |      |
|                |                                                                                                                     |                            | 99998767       | 99998787                                                                                                                                                                                                                                  | ATCCAATGACACAGAGCTTAA  | FW          | 7.3       | 0.766                   | -1504    | upstream   |                 |       |          |                       |      |
|                |                                                                                                                     |                            | 100000261      | 100000281                                                                                                                                                                                                                                 | CTGATGGCCAGTCACTGCC    | RC          | 7.2       | 0.834                   | -2998    | upstream   |                 |       |          |                       |      |
|                |                                                                                                                     |                            | 100001695      | 100001715                                                                                                                                                                                                                                 | catctgcaactctcaacacga  | RC          | 6.5       | 0.773                   | -4432    | upstream   |                 |       |          |                       |      |
|                |                                                                                                                     |                            | <b>Ldhd</b>    | lactate dehydrogenase B<br>NM_008492 chr6 142438768 142456477 - chr6 G2 6 62.0 cM<br>1-Ese14 Mafk chr6:142456198-142456583                                                                                                                | NM_008492              | 142456412   | 142456432 | GCCACTGCAAGTCAAGCAGCC   | RC       | 10.1       |                 | 0.869 | 65       | <sup>1</sup> UTR5     | 1.43 |
|                |                                                                                                                     |                            |                |                                                                                                                                                                                                                                           |                        | 142451619   | 142451639 | GCTGCAGCTGTGTCACCTGA    | RC       | 9.9        |                 | 0.8   | 4858     | intron2               |      |
| 142452910      | 142452930                                                                                                           | AGACAGTTAGACAGCAGAAGG      |                |                                                                                                                                                                                                                                           |                        | FW          | 10.3      | 0.762                   | 3567     | intron2    |                 |       |          |                       |      |
| 142452986      | 142453006                                                                                                           | CCACAATGACTGTGGAACAA       |                |                                                                                                                                                                                                                                           |                        | FW          | 9.5       | 0.782                   | 3491     | intron2    |                 |       |          |                       |      |
| 142454105      | 142454125                                                                                                           | GGAATCTGACTGAGAAGTAGC      |                |                                                                                                                                                                                                                                           |                        | FW          | 7.1       | 0.797                   | 2372     | intron1    |                 |       |          |                       |      |
| 142457462      | 142457482                                                                                                           | GGAGTTGCTGTGAGAAATTT       |                |                                                                                                                                                                                                                                           |                        | RC          | 7.5       | 0.802                   | -985     | upstream   |                 |       |          |                       |      |
| 142457966      | 142457986                                                                                                           | GTAACCTGAAATAGCAAAAGA      |                |                                                                                                                                                                                                                                           |                        | FW          | 6.8       | 0.81                    | -1489    | upstream   |                 |       |          |                       |      |
| 142460244      | 142460264                                                                                                           | tctctgtgatgcagctatttg      |                |                                                                                                                                                                                                                                           |                        | FW          | 8.3       | 0.815                   | -3767    | upstream   |                 |       |          |                       |      |
| 114150104      | 114150124                                                                                                           | AGACCTGACTTTGAAAGTAA       |                |                                                                                                                                                                                                                                           |                        | FW          | 8.1       | 0.768                   | 4118     | downstream |                 |       |          |                       |      |
| 114155721      | 114155741                                                                                                           | TTACAATGACTCAGACTGGAA      |                |                                                                                                                                                                                                                                           |                        | FW          | 8.1       | 0.8                     | -1499    | upstream   |                 |       |          |                       |      |
| 114156609      | 114156629                                                                                                           | tcaacttgacacagctggaat      |                |                                                                                                                                                                                                                                           |                        | FW          | 12        | 0.892                   | -2387    | upstream   |                 |       |          |                       |      |
| 114156933      | 114156953                                                                                                           | cttgctcttgatcatgatgt       |                |                                                                                                                                                                                                                                           |                        | RC          | 8.5       | 0.784                   | -2711    | upstream   |                 |       |          |                       |      |

| Gene symbol    | Gene title/Transcript Info/Chromosomal location/ChIP-seq                                                                                                | RefSeq Transcript ID                                                      | ARE_start(mm9) | ARE_end(mm9)                                                                                     | ARE_seq                 | Orientation | PWM       | MS                     | Dist_TSS | Location              | FI (SFN vs PBS) |
|----------------|---------------------------------------------------------------------------------------------------------------------------------------------------------|---------------------------------------------------------------------------|----------------|--------------------------------------------------------------------------------------------------|-------------------------|-------------|-----------|------------------------|----------|-----------------------|-----------------|
| <b>Lpl</b>     | lipoprotein lipase<br>NM_008509 chr8 71404453 71430831 + chr8 B3.3 8 33.0 cM<br>1-Ch12 Mafk chr8:71409034-71409265 Mel Mafk chr8:71408974-71409225      | NM_008509                                                                 | 114156968      | 114156988                                                                                        | aaacctgactaagacaCTCA    | FW          | 8.1       | 0.782                  | -2746    | upstream              | 1.91            |
|                |                                                                                                                                                         |                                                                           | 71409087       | 71409107                                                                                         | AGAATAGCTGAGTCATGAAAT   | RC          | 11.7      | 0.906                  | 4634     | <sup>1</sup> intron1  |                 |
|                |                                                                                                                                                         |                                                                           | 71400178       | 71400198                                                                                         | CTAGCAGCAGGTCCACCACTG   | RC          | 8.7       | 0.83                   | -4275    | upstream              |                 |
|                |                                                                                                                                                         |                                                                           | 71400220       | 71400240                                                                                         | TTATGAGCTGTCTCATGGGAG   | RC          | 8.5       | 0.81                   | -4233    | upstream              |                 |
|                |                                                                                                                                                         |                                                                           | 71401301       | 71401321                                                                                         | CACAATGCTCTTCAACCTTA    | RC          | 7.9       | 0.819                  | -3152    | upstream              |                 |
|                |                                                                                                                                                         |                                                                           | 71405728       | 71405748                                                                                         | GAACCTTGATTGAGCTAACAG   | FW          | 6.4       | 0.815                  | 1275     | intron1               |                 |
|                |                                                                                                                                                         |                                                                           | 71407134       | 71407154                                                                                         | TGATGGTGACTGAGTCTTCT    | FW          | 7.7       | 0.782                  | 2681     | intron1               |                 |
|                |                                                                                                                                                         |                                                                           | 71407276       | 71407296                                                                                         | GTGATCTGACTAAGCCTGATT   | FW          | 7.6       | 0.868                  | 2823     | intron1               |                 |
|                |                                                                                                                                                         |                                                                           | 71407382       | 71407402                                                                                         | TAAAGATTACACAGCAAAAGG   | FW          | 13.4      | 0.831                  | 2929     | intron1               |                 |
|                |                                                                                                                                                         |                                                                           | 71407689       | 71407709                                                                                         | ATGAATGCAGAGTCACAGATA   | RC          | 13.6      | 0.905                  | 3236     | intron1               |                 |
|                |                                                                                                                                                         |                                                                           | 71408252       | 71408272                                                                                         | AAACATACAAAGTCAGCCTGA   | RC          | 9.2       | 0.775                  | 3799     | intron1               |                 |
|                |                                                                                                                                                         |                                                                           | 71408388       | 71408408                                                                                         | ATCTTATGACGACGCAATGca   | FW          | 8.3       | 0.886                  | 3935     | intron1               |                 |
|                |                                                                                                                                                         |                                                                           | <b>Ltf</b>     | lactotransferrin<br>NM_008522 chr9 110921795 110945270 + chr9 F 9 70.2 cM                        | NM_008522               | 110918087   | 110918107 | CAGCAGGCTGTGTACATGTG   | RC       | 9                     |                 |
| 110918459      | 110918479                                                                                                                                               | gagcaactgactgagctaaagag                                                   |                |                                                                                                  |                         | FW          | 9.5       | 0.877                  | -3336    | upstream              |                 |
| 110921311      | 110921331                                                                                                                                               | CTAGGCTGACTCGGCTCTCC                                                      |                |                                                                                                  |                         | FW          | 7         | 0.853                  | -484     | upstream              |                 |
| 110921548      | 110921568                                                                                                                                               | TGACTCTGATCCTGCAGAAAGC                                                    |                |                                                                                                  |                         | FW          | 8.1       | 0.794                  | -247     | upstream              |                 |
| 110923383      | 110923403                                                                                                                                               | TGGTGTGCTGTGTCAAAATCT                                                     |                |                                                                                                  |                         | RC          | 9.9       | 0.9                    | 1588     | exon2                 |                 |
| 110924359      | 110924379                                                                                                                                               | CGAAGGGCTAATCATTCTGA                                                      |                |                                                                                                  |                         | RC          | 11.8      | 0.844                  | 2564     | intron2               |                 |
| 110925979      | 110925999                                                                                                                                               | ACATTTGCCCACTCAGCATGG                                                     |                |                                                                                                  |                         | RC          | 9.7       | 0.816                  | 4184     | intron5               |                 |
| 7129930        | 7129950                                                                                                                                                 | ttaactgtctgagctcactctctc                                                  |                |                                                                                                  |                         | RC          | 16.2      | 0.947                  | -1327    | <sup>1</sup> upstream |                 |
| <b>Macrod1</b> | MACRO domain containing 1<br>NM_134147 chr19 7131257 7272552 + chr19 A 19<br>1-Ch12 Mafk chr19:7129780-7130082 Ese14 Mafk chr19:7129638-7130202         | NM_134147                                                                 | 7126796        | 7126816                                                                                          | ataaaggcagggttcactgtga  | RC          | 9.6       | 0.791                  | -4461    | upstream              | 1.58            |
|                |                                                                                                                                                         |                                                                           | 7128056        | 7128076                                                                                          | ectggttgactgagctgagcat  | FW          | 7.2       | 0.871                  | -3201    | upstream              |                 |
|                |                                                                                                                                                         |                                                                           | 7128106        | 7128126                                                                                          | cctgcatgactctgagccaga   | FW          | 12.2      | 0.876                  | -3151    | upstream              |                 |
|                |                                                                                                                                                         |                                                                           | 7130943        | 7130963                                                                                          | AGCAGAGCTGGGTGATGCGGA   | RC          | 7.1       | 0.777                  | -314     | upstream              |                 |
|                |                                                                                                                                                         |                                                                           | 7132408        | 7132428                                                                                          | ATGGGGGCTGGGTCAAGCGGG   | RC          | 8.8       | 0.866                  | 1151     | intron1               |                 |
|                |                                                                                                                                                         |                                                                           | 7135778        | 7135798                                                                                          | GCAAGTTGAGGCTCAGTGTG    | RC          | 9.1       | 0.765                  | 4521     | intron1               |                 |
|                |                                                                                                                                                         |                                                                           | 7136067        | 7136087                                                                                          | AGCTGCTGAGCCAGCATACTG   | FW          | 6.7       | 0.812                  | 4810     | intron1               |                 |
|                |                                                                                                                                                         |                                                                           | 21472276       | 21472296                                                                                         | GAACGGCAGCTTCACCGTIG    | RC          | 6.6       | 0.771                  | -339     | <sup>1</sup> upstream |                 |
|                |                                                                                                                                                         |                                                                           | 21467482       | 21467502                                                                                         | ttaaccaactgagctcaGCCTTA | RC          | 11.3      | 0.809                  | 4455     | intron1               |                 |
|                |                                                                                                                                                         |                                                                           | 21467548       | 21467568                                                                                         | ggcatgtgacacagcttgtca   | FW          | 7.5       | 0.863                  | 4389     | intron1               |                 |
| 21467942       | 21467962                                                                                                                                                | ATGAGCAGCTGAGTAATGGAAA                                                    | RC             | 10.8                                                                                             | 0.819                   | 3995        | intron1   |                        |          |                       |                 |
| 21470827       | 21470847                                                                                                                                                | TCAAAATAACTAGGCCAACAAAT                                                   | FW             | 9.8                                                                                              | 0.794                   | 1110        | intron1   |                        |          |                       |                 |
| 21472851       | 21472871                                                                                                                                                | GACCAATGAATATGCTCTTGG                                                     | FW             | 6.4                                                                                              | 0.774                   | -914        | upstream  |                        |          |                       |                 |
| 21472961       | 21472981                                                                                                                                                | ATGATgctttagtcaaggctt                                                     | RC             | 9.1                                                                                              | 0.779                   | -1024       | upstream  |                        |          |                       |                 |
| 21473556       | 21473576                                                                                                                                                | GTTACCTCTGTGTGAGGGACT                                                     | RC             | 7.7                                                                                              | 0.769                   | -1619       | upstream  |                        |          |                       |                 |
| 21474394       | 21474414                                                                                                                                                | TGAAATGCTGACTGACCCAGGA                                                    | RC             | 8.6                                                                                              | 0.776                   | -2457       | upstream  |                        |          |                       |                 |
| 21475996       | 21476016                                                                                                                                                | caaaactctctgtcaaaagtgg                                                    | RC             | 8.6                                                                                              | 0.791                   | -4059       | upstream  |                        |          |                       |                 |
| <b>Mdh2</b>    | malate dehydrogenase 2, NAD (mitochondrial)<br>NM_008617 chr5 136254518 136266256 + chr5 G2 5 78.0 cM                                                   | NM_008617                                                                 | 136253000      | 136253020                                                                                        | TTGCTTTCTCTGTCACTGTCC   | RC          | 7.6       | 0.782                  | -1518    | upstream              | 1.37            |
|                |                                                                                                                                                         |                                                                           | 136253822      | 136253842                                                                                        | GTGCCATGACAAACCCGAGTAC  | FW          | 6.9       | 0.814                  | -696     | upstream              |                 |
|                |                                                                                                                                                         |                                                                           | 136255057      | 136255077                                                                                        | AAATTAGCACAAGTCAGTGGCC  | RC          | 8.5       | 0.838                  | 539      | intron1               |                 |
|                |                                                                                                                                                         |                                                                           | 136255523      | 136255543                                                                                        | tGAGAGTGAGAAGGCCCTTTGA  | FW          | 7.5       | 0.763                  | 1005     | intron1               |                 |
|                |                                                                                                                                                         |                                                                           | 136255778      | 136255798                                                                                        | AAGAGGGCAGGGTCAATATT    | RC          | 8.3       | 0.829                  | 1260     | intron1               |                 |
|                |                                                                                                                                                         |                                                                           | 136256217      | 136256237                                                                                        | ccccggtagcttagagagact   | FW          | 11.1      | 0.818                  | 1699     | intron1               |                 |
|                |                                                                                                                                                         |                                                                           | 136257352      | 136257372                                                                                        | GGCTGTGCTGTCTCAATGGAA   | RC          | 6.8       | 0.823                  | 2834     | intron1               |                 |
|                |                                                                                                                                                         |                                                                           | 136257588      | 136257608                                                                                        | TGACAGTGACTCTGGGCTCTC   | FW          | 10.5      | 0.777                  | 3070     | intron1               |                 |
|                |                                                                                                                                                         |                                                                           | 136257672      | 136257692                                                                                        | TGACAGTGACTCAGGGTAAAG   | FW          | 12.7      | 0.821                  | 3154     | intron1               |                 |
|                |                                                                                                                                                         |                                                                           | 136258293      | 136258313                                                                                        | ttacttgcatagtgaaactgt   | RC          | 6.4       | 0.777                  | 3775     | intron1               |                 |
|                |                                                                                                                                                         |                                                                           | 136258528      | 136258548                                                                                        | ctacttctaggttataactgc   | RC          | 7.9       | 0.794                  | 4010     | intron1               |                 |
|                |                                                                                                                                                         |                                                                           | 136259303      | 136259323                                                                                        | AGCAGATCTGAGTCACATTGA   | RC          | 9.5       | 0.811                  | 4785     | exon2                 |                 |
|                |                                                                                                                                                         |                                                                           | 136259448      | 136259468                                                                                        | TTAGATGACATTCGACAAAT    | FW          | 11.9      | 0.861                  | 4930     | intron2               |                 |
|                |                                                                                                                                                         |                                                                           | <b>Me3</b>     | malic enzyme 3, NADP(+)-dependent, mitochondrial<br>NM_181407 chr7 96781327 97002869 + chr7 E1 7 | NM_181407               | 96776483    | 96776503  | ACTATTGCAAAAGTCAACTAGG | RC       | 10.4                  |                 |
| 96779133       | 96779153                                                                                                                                                | AGCCACTGACTCTGAAAGATG                                                     |                |                                                                                                  |                         | FW          | 8.2       | 0.774                  | -2194    | upstream              |                 |
| 96782583       | 96782603                                                                                                                                                | GAAATGCTATGTAAAGGGT                                                       |                |                                                                                                  |                         | RC          | 6.7       | 0.788                  | 1256     | intron1               |                 |
| 96782884       | 96782904                                                                                                                                                | ACTCCCTGACGGTGCAGTCTT                                                     |                |                                                                                                  |                         | FW          | 8.2       | 0.84                   | 1557     | intron1               |                 |
| 96785203       | 96785223                                                                                                                                                | GTAGAATTACATAGCCGATAA                                                     |                |                                                                                                  |                         | FW          | 6.8       | 0.765                  | 3876     | intron1               |                 |
| 96785225       | 96785245                                                                                                                                                | CAAGTCTGAGTGGCATTGGT                                                      |                |                                                                                                  |                         | FW          | 7         | 0.801                  | 3898     | intron1               |                 |
| 96785953       | 96785973                                                                                                                                                | AAAGTTAATCTCAGCAGCACT                                                     |                |                                                                                                  |                         | FW          | 8.6       | 0.833                  | 4626     | intron1               |                 |
| 147277546      | 147277566                                                                                                                                               | CTCTGTGCTGATTCAAGTCCA                                                     |                |                                                                                                  |                         | RC          | 11.2      | 0.861                  | 1472     | UTRS                  |                 |
| <b>Mfn2</b>    | mitofusin 2<br>NM_133201 chr4 147247694 147279018 - chr4 E2 4                                                                                           | NM_133201                                                                 | 147277701      | 147277721                                                                                        | AGGGAAGCTTACTCATTGCGG   | RC          | 7.8       | 0.822                  | 1317     | intron1               | 1.42            |
|                |                                                                                                                                                         |                                                                           | 147277876      | 147277896                                                                                        | AAGGAGCTGAATCAGGCCAA    | RC          | 7.8       | 0.825                  | 1142     | intron1               |                 |
|                |                                                                                                                                                         |                                                                           | 147282154      | 147282174                                                                                        | aataatgcagagtaagccagt   | RC          | 10.7      | 0.804                  | -3136    | upstream              |                 |
|                |                                                                                                                                                         |                                                                           | 8478522        | 84785242                                                                                         | ttacctgctgagctatTGAGT   | RC          | 16.5      | 0.955                  | 1845     | <sup>1</sup> intron1  |                 |
|                |                                                                                                                                                         |                                                                           | 8472628        | 8472648                                                                                          | ATTATGGCTTCTCCACAGAGG   | RC          | 7.5       | 0.796                  | -4049    | upstream              |                 |
| <b>Mpc1</b>    | brain protein 44-like//brain protein 44-like protein-like<br>NM_018819 chr17 8476677 8490526 + chr17 A1 17 7.8 cM<br>1-Ese14 Mafk chr17:8478371-8478634 | NM_018819<br>XM_003086034<br>XM_003086035<br>XM_003086036<br>XM_003086037 | 8473372        | 8473392                                                                                          | tgtagtgctgattaatgatta   | RC          | 11.1      | 0.788                  | -3305    | upstream              | 1.41            |
|                |                                                                                                                                                         |                                                                           | 8473534        | 8473554                                                                                          | tcactggcttgctcaagcatgg  | RC          | 6.6       | 0.788                  | -3143    | upstream              |                 |
|                |                                                                                                                                                         |                                                                           | 8474295        | 8474315                                                                                          | gtatcatgactcaagacataag  | FW          | 9.8       | 0.806                  | -2382    | upstream              |                 |
|                |                                                                                                                                                         |                                                                           | 8474810        | 8474830                                                                                          | CTATAATTACTTAGCACTAGA   | FW          | 10.6      | 0.828                  | -1867    | upstream              |                 |
|                |                                                                                                                                                         |                                                                           | 8475032        | 8475052                                                                                          | tcacctgactaagtacacact   | RC          | 7.2       | 0.806                  | -1645    | upstream              |                 |
|                |                                                                                                                                                         |                                                                           | 8475638        | 8475658                                                                                          | acatatattactatgcatagaaa | FW          | 6.4       | 0.777                  | -1039    | upstream              |                 |
|                |                                                                                                                                                         |                                                                           | 8477259        | 8477279                                                                                          | CACCCGTGACTGAGAGGACGA   | FW          | 7.1       | 0.774                  | 582      | intron1               |                 |

| Gene symbol   | Gene title/Transcript Info/Chromosomal location/ChIP-seq                                                      | RefSeq Transcript ID                   | ARE_start(mm9) | ARE_end(mm9)                                                                             | ARE_seq                | Orientation | PWM       | MS                    | Dist_TSS | Location | FI (SFN vs PBS) |       |       |          |      |
|---------------|---------------------------------------------------------------------------------------------------------------|----------------------------------------|----------------|------------------------------------------------------------------------------------------|------------------------|-------------|-----------|-----------------------|----------|----------|-----------------|-------|-------|----------|------|
| <i>Mrap</i>   | melanocortin 2 receptor accessory protein<br>NM_029844 chr16 90738568 90750021 + chr16 C3.3 16                | NM_029844                              | 8477748        | 8477768                                                                                  | AGAGGTTGAAGAAGCACTTTG  | FW          | 7.5       | 0.814                 | 1071     | intron1  | 2.77            |       |       |          |      |
|               |                                                                                                               |                                        | 8479667        | 8479687                                                                                  | TGGGGTTAACCTAGCAGCTTTG | FW          | 9         | 0.788                 | 2990     | intron1  |                 |       |       |          |      |
|               |                                                                                                               |                                        | 90734958       | 90734978                                                                                 | aaactctgagccagcccccac  | FW          | 8.2       | 0.813                 | -3610    | upstream |                 |       |       |          |      |
|               |                                                                                                               |                                        | 90734998       | 90735018                                                                                 | gaagtgccttggctcatggtg  | RC          | 9         | 0.768                 | -3570    | upstream |                 |       |       |          |      |
|               |                                                                                                               |                                        | 90735790       | 90735810                                                                                 | CAACTTTCACCTTAGCACAAT  | FW          | 9.3       | 0.822                 | -2778    | upstream |                 |       |       |          |      |
|               |                                                                                                               |                                        | 90736140       | 90736160                                                                                 | lctgcccactgagccacatccT | RC          | 6.9       | 0.785                 | -2428    | upstream |                 |       |       |          |      |
|               |                                                                                                               |                                        | 90736398       | 90736418                                                                                 | GGAGTTCCTGAGTCAACCACT  | RC          | 9.6       | 0.818                 | -2170    | upstream |                 |       |       |          |      |
|               |                                                                                                               |                                        | 90738930       | 90738950                                                                                 | GGAAGGTGACCAGCGCAGAGGC | FW          | 8.8       | 0.843                 | 362      | intron1  |                 |       |       |          |      |
|               |                                                                                                               |                                        | 90739300       | 90739320                                                                                 | tctctcgctaaactcAGAGTGA | RC          | 10.5      | 0.837                 | 732      | intron1  |                 |       |       |          |      |
|               |                                                                                                               |                                        | 90740448       | 90740468                                                                                 | ACATCTGCTTGTCTCATCTGCC | RC          | 7.7       | 0.806                 | 1880     | intron1  |                 |       |       |          |      |
|               |                                                                                                               |                                        | 90741467       | 90741487                                                                                 | lgtcgtccttggccaccacct  | RC          | 9.7       | 0.876                 | 2899     | intron1  |                 |       |       |          |      |
|               |                                                                                                               |                                        | 90741748       | 90741768                                                                                 | atcccctgagtcgcgattaaa  | FW          | 7.3       | 0.813                 | 3180     | intron1  |                 |       |       |          |      |
|               |                                                                                                               |                                        | 90742136       | 90742156                                                                                 | GTGGCTGCCATGTCAGCATCT  | RC          | 7.8       | 0.836                 | 3568     | intron1  |                 |       |       |          |      |
|               |                                                                                                               |                                        | 90743436       | 90743456                                                                                 | CCGGCTTAACAAGACCAAGA   | FW          | 7.3       | 0.786                 | 4868     | intron1  |                 |       |       |          |      |
|               |                                                                                                               |                                        | <i>Mrp12</i>   | mitochondrial ribosomal protein L12<br>NM_027204 chr11 120345982 120350068 + chr11 E2 11 | NM_027204              | 120341044   | 120341064 | GGCAGCTGACCCAGCATGTGG | FW       | 9.4      |                 | 0.883 | -4938 | upstream | 1.40 |
| 120344830     | 120344850                                                                                                     | CACCATGCAGAGTAACACTAC                  |                |                                                                                          |                        | RC          | 7.9       | 0.798                 | -1152    | upstream |                 |       |       |          |      |
| 120345423     | 120345443                                                                                                     | GATTCTGCAGACTCACTGTGT                  |                |                                                                                          |                        | RC          | 10.9      | 0.833                 | -559     | upstream |                 |       |       |          |      |
| 120348920     | 120348940                                                                                                     | gtcagtcggttccacagga                    |                |                                                                                          |                        | RC          | 13.5      | 0.911                 | 2938     | intron3  |                 |       |       |          |      |
| 149020677     | 149020697                                                                                                     | atactcttactcagcctcaaa                  |                |                                                                                          |                        | FW          | 7.6       | 0.807                 | -4299    | upstream |                 |       |       |          |      |
| <i>Muc5b</i>  | mucin 5, subtype B, tracheobronchial<br>NM_028801 chr7 149024976 149058990 + chr7 F5 7 69.01 cM               | NM_028801                              | 149021586      | 149021606                                                                                | CCAGTGTCACTAAGCAGCACA  | FW          | 10.5      | 0.836                 | -3390    | upstream | 5.74            |       |       |          |      |
|               |                                                                                                               |                                        | 149023238      | 149023258                                                                                | CTCAAGGCCCACTCATGTGT   | RC          | 6.4       | 0.785                 | -1738    | upstream |                 |       |       |          |      |
|               |                                                                                                               |                                        | 149023668      | 149023688                                                                                | gcgcgttgactgagcggggtll | FW          | 10.2      | 0.888                 | -1308    | upstream |                 |       |       |          |      |
|               |                                                                                                               |                                        | 149023895      | 149023915                                                                                | ACTCCCTGACATGGCCAACCC  | FW          | 6.9       | 0.813                 | -1081    | upstream |                 |       |       |          |      |
|               |                                                                                                               |                                        | 149024280      | 149024300                                                                                | TCATTTCTTGTCAAGGCCCC   | RC          | 8.5       | 0.777                 | -696     | upstream |                 |       |       |          |      |
|               |                                                                                                               |                                        | 149025599      | 149025619                                                                                | CTAATGGCTGAGTCAGGTGGG  | RC          | 14.6      | 0.919                 | 623      | intron1  |                 |       |       |          |      |
|               |                                                                                                               |                                        | 149026405      | 149026425                                                                                | GGCCCTTGAGGAAGCATTAAT  | FW          | 6.5       | 0.806                 | 1429     | intron1  |                 |       |       |          |      |
|               |                                                                                                               |                                        | 149027535      | 149027555                                                                                | CAGGATGACCAAGATAAAT    | FW          | 7.7       | 0.767                 | 2559     | intron2  |                 |       |       |          |      |
|               |                                                                                                               |                                        | 90954054       | 90954074                                                                                 | TTCACTGCCCAATTCATTTGGT | RC          | 7         | 0.798                 | -4246    | upstream |                 |       |       |          |      |
|               |                                                                                                               |                                        | 90954087       | 90954107                                                                                 | ATTAGGCTCACTCACTTCCG   | RC          | 7.6       | 0.813                 | -4213    | upstream |                 |       |       |          |      |
| <i>Mybpc3</i> | myosin binding protein C, cardiac<br>NM_008653 chr2 90958300 90976673 + chr2 E1 2                             | NM_008653                              | 90957401       | 90957421                                                                                 | TGCACATGACTTAGGAGCAGG  | FW          | 9.3       | 0.801                 | -899     | upstream | 4.90            |       |       |          |      |
|               |                                                                                                               |                                        | 90958569       | 90958589                                                                                 | GACTTCACTAAGTCAGGAAGA  | RC          | 7.2       | 0.773                 | 269      | intron1  |                 |       |       |          |      |
|               |                                                                                                               |                                        | 90959485       | 90959505                                                                                 | ACACACTGACAGTGGGGATG   | FW          | 9         | 0.833                 | 1185     | exon2    |                 |       |       |          |      |
|               |                                                                                                               |                                        | 90959569       | 90959589                                                                                 | TCAAGTTCACAGAGCCAGTA   | FW          | 6.5       | 0.771                 | 1269     | exon2    |                 |       |       |          |      |
|               |                                                                                                               |                                        | 90959797       | 90959817                                                                                 | CCCAGAGCTGTCACCCAGA    | RC          | 7.3       | 0.814                 | 1497     | intron2  |                 |       |       |          |      |
|               |                                                                                                               |                                        | 90959872       | 90959892                                                                                 | GTTGTGCTGGGTCAAGGCCA   | RC          | 11.4      | 0.899                 | 1572     | intron2  |                 |       |       |          |      |
|               |                                                                                                               |                                        | 90960636       | 90960656                                                                                 | CAGCTATGACAGAGCCAGCA   | FW          | 8.5       | 0.854                 | 2336     | exon5    |                 |       |       |          |      |
|               |                                                                                                               |                                        | 90961853       | 90961873                                                                                 | CAAGCTGCCAGTCACTGAGA   | RC          | 10.5      | 0.852                 | 3553     | intron7  |                 |       |       |          |      |
|               |                                                                                                               |                                        | 55580702       | 55580722                                                                                 | GAGAGTGGAGTAGCAAAAAG   | FW          | 10.7      | 0.848                 | 4742     | intron9  |                 |       |       |          |      |
|               |                                                                                                               |                                        | 55582201       | 55582221                                                                                 | GTTAGTGTCTGCTCACGTGAT  | RC          | 6.7       | 0.806                 | 3243     | intron6  |                 |       |       |          |      |
|               |                                                                                                               |                                        | 55582465       | 55582485                                                                                 | TGACGGTACAGCAGAGAGGC   | FW          | 10.1      | 0.805                 | 2979     | exon5    |                 |       |       |          |      |
|               |                                                                                                               |                                        | 55582837       | 55582857                                                                                 | GTTTCTGCTGATCACTGGT    | RC          | 8         | 0.833                 | 2607     | exon4    |                 |       |       |          |      |
| <i>Myh6</i>   | myosin, heavy polypeptide 6, cardiac muscle, alpha<br>NM_010856 chr14 55560757 55585444 - chr14 C3 14 20.0 cM | NM_001164171<br>NM_010856<br>NM_080728 | 55584114       | 55584134                                                                                 | CCGAGTGAATTTGCCCTT     | FW          | 11        | 0.859                 | 1330     | exon3    | 3.63            |       |       |          |      |
|               |                                                                                                               |                                        | 55584861       | 55584881                                                                                 | GCACCTGACACaggaaggaa   | FW          | 10.4      | 0.809                 | 583      | intron1  |                 |       |       |          |      |
|               |                                                                                                               |                                        | 55608828       | 55608848                                                                                 | AGCTCTTCAGAGTCATCAATG  | RC          | 6.7       | 0.769                 | 4558     | exon12   |                 |       |       |          |      |
|               |                                                                                                               |                                        | 55610801       | 55610821                                                                                 | TGACCGTGCACAGAGAGGC    | FW          | 10.1      | 0.805                 | 2585     | exon6    |                 |       |       |          |      |
|               |                                                                                                               |                                        | 55610909       | 55610929                                                                                 | CGAAGCGCAGAACTCAGTGG   | RC          | 9.4       | 0.81                  | 2477     | intron5  |                 |       |       |          |      |
|               |                                                                                                               |                                        | 55611181       | 55611201                                                                                 | GTTTCTGCTGATCACTGGT    | RC          | 8         | 0.833                 | 2205     | exon5    |                 |       |       |          |      |
|               |                                                                                                               |                                        | 55611202       | 55611222                                                                                 | CCTCCTCAGCTCACCGTCT    | RC          | 7.7       | 0.777                 | 2184     | exon5    |                 |       |       |          |      |
|               |                                                                                                               |                                        | 55611527       | 55611547                                                                                 | CAGCAGTGAATTTGCCACCT   | FW          | 9         | 0.844                 | 1859     | exon4    |                 |       |       |          |      |
|               |                                                                                                               |                                        | 55611574       | 55611594                                                                                 | AACTCTTCTTTGTCATCGGC   | RC          | 10.3      | 0.792                 | 1812     | exon4    |                 |       |       |          |      |
|               |                                                                                                               |                                        | 55612846       | 55612866                                                                                 | TGAACTGCTATTTCAGAGACT  | RC          | 6.7       | 0.807                 | 540      | intron1  |                 |       |       |          |      |
|               |                                                                                                               |                                        | 55615931       | 55615951                                                                                 | GTCTGGCTCTGTCAACACAC   | RC          | 6.7       | 0.843                 | -2545    | upstream |                 |       |       |          |      |
|               |                                                                                                               |                                        | 55617383       | 55617403                                                                                 | gagaatgccaggtcagtcagg  | RC          | 7.4       | 0.831                 | -3997    | upstream |                 |       |       |          |      |
|               |                                                                                                               |                                        | 55617536       | 55617556                                                                                 | TCAAGTGAATTTGACAAATC   | FW          | 9.4       | 0.789                 | -4150    | upstream |                 |       |       |          |      |
| 55618196      | 55618216                                                                                                      | aaacatgattctgctcaagg                   | FW             | 7                                                                                        | 0.788                  | -4810       | upstream  |                       |          |          |                 |       |       |          |      |
| <i>Myh7</i>   | myosin, heavy polypeptide 7, cardiac muscle, beta<br>NM_001164171<br>NM_010856<br>NM_080728                   | NM_001164171<br>NM_010856<br>NM_080728 | 110664088      | 110664108                                                                                | GAGTCTGCTGTGTCAGGGGGT  | RC          | 14.1      | 0.92                  | -2096    | upstream | 5.90            |       |       |          |      |
|               |                                                                                                               |                                        | 110667168      | 110667188                                                                                | CTGAGTCTGAGTCACTTCTT   | RC          | 13        | 0.841                 | 984      | intron1  |                 |       |       |          |      |
|               |                                                                                                               |                                        | 110667813      | 110667833                                                                                | CTGTCTCTTTGTCACCTCAA   | RC          | 6.8       | 0.769                 | 1629     | intron1  |                 |       |       |          |      |
|               |                                                                                                               |                                        | 110668237      | 110668257                                                                                | TGACCTTGACTTTGGAGACAG  | FW          | 7.6       | 0.767                 | 2053     | intron1  |                 |       |       |          |      |
|               |                                                                                                               |                                        | 110668552      | 110668572                                                                                | TGGTGTGACACAGCCTCTGG   | FW          | 10.4      | 0.869                 | 2368     | intron1  |                 |       |       |          |      |
|               |                                                                                                               |                                        | 110669281      | 110669301                                                                                | CACCCTGCCAATTCATGTCGG  | RC          | 7.2       | 0.802                 | 3097     | intron3  |                 |       |       |          |      |
|               |                                                                                                               |                                        | 110669605      | 110669625                                                                                | TTGCTTTGACTAAGGAAGAGT  | FW          | 7.6       | 0.796                 | 3421     | intron3  |                 |       |       |          |      |
|               |                                                                                                               |                                        | 110669783      | 110669803                                                                                | tcgctatgacttggaaagccag | FW          | 7.1       | 0.765                 | 3599     | intron3  |                 |       |       |          |      |
|               |                                                                                                               |                                        | 110670214      | 110670234                                                                                | TCAGGGTGACAAAGGTCTATG  | FW          | 10.9      | 0.779                 | 4030     | intron3  |                 |       |       |          |      |
|               |                                                                                                               |                                        | 110670535      | 110670555                                                                                | GCAACGGCAGCGTCACTGGTG  | RC          | 7.5       | 0.811                 | 4351     | exon4    |                 |       |       |          |      |
|               |                                                                                                               |                                        | <i>Mylk3</i>   | myosin light chain kinase 3<br>NM_175441 chr8 87848827 87889223 - chr8 C3 8              | NM_175441              | 87886765    | 87886785  | TCAGTGTGACCCAGCCTGTG  | FW       | 9.1      |                 | 0.782 | 2458  | intron1  | 4.25 |
|               |                                                                                                               |                                        |                |                                                                                          |                        | 87889213    | 87889233  | CCCTCTGACTGAGCTGTTT   | FW       | 11.4     |                 | 0.89  | 10    | UTR5     |      |
| 87891227      | 87891247                                                                                                      | acaCAGTAACCCAGCAGATTA                  |                |                                                                                          |                        | FW          | 12.5      | 0.834                 | -2004    | upstream |                 |       |       |          |      |
| 87891259      | 87891279                                                                                                      | CTGTAGTGAATCAGCTGACA                   |                |                                                                                          |                        | FW          | 6.5       | 0.823                 | -2036    | upstream |                 |       |       |          |      |
| 87891424      | 87891444                                                                                                      | aaggctgcagcttcaggccta                  |                |                                                                                          |                        | RC          | 6.8       | 0.783                 | -2201    | upstream |                 |       |       |          |      |

| Gene symbol | Gene title/Transcript Info/Chromosomal location/ChIP-seq                                                                                                                          | RefSeq Transcript ID  | ARE_start(mm9) | ARE_end(mm9)                                                                                                                                                                                           | ARE_seq                   | Orientation | PWM      | MS                    | Dist_TSS | Location              | FI (SFN vs PBS) |       |       |                       |      |
|-------------|-----------------------------------------------------------------------------------------------------------------------------------------------------------------------------------|-----------------------|----------------|--------------------------------------------------------------------------------------------------------------------------------------------------------------------------------------------------------|---------------------------|-------------|----------|-----------------------|----------|-----------------------|-----------------|-------|-------|-----------------------|------|
|             |                                                                                                                                                                                   |                       | 87891586       | 87891606                                                                                                                                                                                               | GAGACTGCCATCTCAGGGCTG     | RC          | 7.6      | 0.775                 | -2363    | upstream              |                 |       |       |                       |      |
|             |                                                                                                                                                                                   |                       | 87892017       | 87892037                                                                                                                                                                                               | aggaatgctatgtcaccacaact   | RC          | 9.6      | 0.879                 | -2794    | upstream              |                 |       |       |                       |      |
|             |                                                                                                                                                                                   |                       | 87892290       | 87892310                                                                                                                                                                                               | TAAAGCTGAGCAGCCTAAGC      | FW          | 7.1      | 0.8                   | -3067    | upstream              |                 |       |       |                       |      |
|             |                                                                                                                                                                                   |                       | 87892393       | 87892413                                                                                                                                                                                               | GGCCCTGACTAGGCTATT        | FW          | 9.6      | 0.847                 | -3170    | upstream              |                 |       |       |                       |      |
|             |                                                                                                                                                                                   |                       | 32869982       | 32870002                                                                                                                                                                                               | TGGAGATGACCCAGAGTGG       | FW          | 8.1      | 0.784                 | 3666     | intron1               |                 |       |       |                       |      |
|             |                                                                                                                                                                                   |                       | 32872504       | 32872524                                                                                                                                                                                               | GTTTTTCCTATGTCCACACACC    | RC          | 7.4      | 0.77                  | 1144     | intron1               |                 |       |       |                       |      |
|             |                                                                                                                                                                                   |                       | 32873245       | 32873265                                                                                                                                                                                               | GAAAATGCATTTCCAGAGTCT     | RC          | 6.5      | 0.779                 | 403      | intron1               |                 |       |       |                       |      |
|             |                                                                                                                                                                                   |                       | 32874701       | 32874721                                                                                                                                                                                               | TCTTGGCGCAGTGCACCATAG     | RC          | 9.7      | 0.843                 | -1053    | upstream              |                 |       |       |                       |      |
|             |                                                                                                                                                                                   |                       | 32875676       | 32875696                                                                                                                                                                                               | ACCCTCACTCCCGCAAGTAG      | FW          | 7.5      | 0.79                  | -2028    | upstream              |                 |       |       |                       |      |
|             |                                                                                                                                                                                   |                       | 32875898       | 32875918                                                                                                                                                                                               | TTCCCTCCTTAGTCAGATGGG     | RC          | 7.1      | 0.793                 | -2250    | upstream              |                 |       |       |                       |      |
| 32876152    | 32876172                                                                                                                                                                          | TCTTGATGACTTTGAAGTGAT | FW             | 7.6                                                                                                                                                                                                    | 0.764                     | -2504       | upstream |                       |          |                       |                 |       |       |                       |      |
| 32876340    | 32876360                                                                                                                                                                          | TGTGAGTAACACTGCACTCT  | FW             | 7.1                                                                                                                                                                                                    | 0.762                     | -2692       | upstream |                       |          |                       |                 |       |       |                       |      |
| 32877306    | 32877326                                                                                                                                                                          | TTTGCTACTTAGTCATCAGAG | RC             | 6.8                                                                                                                                                                                                    | 0.79                      | -3658       | upstream |                       |          |                       |                 |       |       |                       |      |
| 32877381    | 32877401                                                                                                                                                                          | CATCAGTGACACAGTCTGTT  | FW             | 8                                                                                                                                                                                                      | 0.77                      | -3733       | upstream |                       |          |                       |                 |       |       |                       |      |
| Myom2       | myomesin 2<br>NM_008664 chr8 15057652 15133419 + chr8 A1.1 8                                                                                                                      | NM_008664             | 15053664       | 15053684                                                                                                                                                                                               | CAGATTGCTATGTCCACACTGA    | RC          | 16.3     | 0.924                 | -3988    | upstream              | 4.29            |       |       |                       |      |
|             |                                                                                                                                                                                   |                       | 15054711       | 15054731                                                                                                                                                                                               | TGTGAATGAGAAGCTGTTC       | FW          | 6.6      | 0.785                 | -2941    | upstream              |                 |       |       |                       |      |
|             |                                                                                                                                                                                   |                       | 15055838       | 15055858                                                                                                                                                                                               | caaatagctcagtaagctctt     | RC          | 6.6      | 0.778                 | -1814    | upstream              |                 |       |       |                       |      |
|             |                                                                                                                                                                                   |                       | 15056211       | 15056231                                                                                                                                                                                               | gcgttgcccttggcctatgggtgt  | RC          | 8.5      | 0.765                 | -1441    | upstream              |                 |       |       |                       |      |
|             |                                                                                                                                                                                   |                       | 15057008       | 15057028                                                                                                                                                                                               | GCAGCGTGACCCTGCCAGGTG     | FW          | 8.1      | 0.824                 | -644     | upstream              |                 |       |       |                       |      |
|             |                                                                                                                                                                                   |                       | 15057322       | 15057342                                                                                                                                                                                               | CTAACAGCTGATTCAGATGTT     | RC          | 6.9      | 0.82                  | -330     | upstream              |                 |       |       |                       |      |
|             |                                                                                                                                                                                   |                       | 15059345       | 15059365                                                                                                                                                                                               | TCATTTCCCTGTGCAAAATCA     | RC          | 9        | 0.797                 | 1693     | intron1               |                 |       |       |                       |      |
|             |                                                                                                                                                                                   |                       | 15060989       | 15061009                                                                                                                                                                                               | GTGGGTGCATATTCACAGTGA     | RC          | 10.2     | 0.828                 | 3337     | intron1               |                 |       |       |                       |      |
|             |                                                                                                                                                                                   |                       | 15061647       | 15061667                                                                                                                                                                                               | CACAGTTCAGTGCACAGTGA      | RC          | 11.3     | 0.786                 | 3995     | intron1               |                 |       |       |                       |      |
|             |                                                                                                                                                                                   |                       | 15061788       | 15061808                                                                                                                                                                                               | CAAGCATCACAGAGCAGGAGT     | FW          | 9.4      | 0.799                 | 4136     | intron1               |                 |       |       |                       |      |
|             |                                                                                                                                                                                   |                       | 122735011      | 122735031                                                                                                                                                                                              | GAAGGCTCACTCAGCATTCCC     | FW          | 9.9      | 0.838                 | 2894     | intron2               |                 |       |       |                       |      |
|             |                                                                                                                                                                                   |                       | 122736775      | 122736795                                                                                                                                                                                              | GATAGGGCTGTGTGACCATTTG    | RC          | 10       | 0.796                 | 1130     | intron2               |                 |       |       |                       |      |
|             |                                                                                                                                                                                   |                       | 122737408      | 122737428                                                                                                                                                                                              | TGTACATGACCCAGTACATTG     | FW          | 8.8      | 0.788                 | 497      | intron1               |                 |       |       |                       |      |
|             |                                                                                                                                                                                   |                       | 122739119      | 122739139                                                                                                                                                                                              | CCCCACTGAACAGCCAAACCG     | FW          | 7.9      | 0.808                 | -1214    | upstream              |                 |       |       |                       |      |
|             |                                                                                                                                                                                   |                       | 122739211      | 122739231                                                                                                                                                                                              | CTACCTGACTTTGCCTTCT       | FW          | 7.5      | 0.838                 | -1306    | upstream              |                 |       |       |                       |      |
|             |                                                                                                                                                                                   |                       | 122740018      | 122740038                                                                                                                                                                                              | aggaatgacatggcatgaga      | FW          | 8        | 0.834                 | -2113    | upstream              |                 |       |       |                       |      |
|             |                                                                                                                                                                                   |                       | 122741927      | 122741947                                                                                                                                                                                              | GAGGGATGACTCAGACAGCAA     | FW          | 7.9      | 0.787                 | -4022    | upstream              |                 |       |       |                       |      |
|             |                                                                                                                                                                                   |                       | Ndr4           | N-myc downstream regulated gene 4<br>NM_001195006 chr8 98226936 98239019 + chr8 D1 8<br>1-Ch12 Mafk chr8:98224212-98224509<br>2-Ch12 Mafk chr8:98224212-98224509<br>3-Ch12 Mafk chr8:98224212-98224509 | NM_001195006<br>NM_145602 | 98224291    | 98224311 | CGGCAATGAGTGTGCAGAAAG | FW       | 8.7                   |                 | 0.805 | -2645 | <sup>1</sup> upstream | 5.77 |
|             |                                                                                                                                                                                   |                       |                |                                                                                                                                                                                                        |                           | 98224326    | 98224346 | GTCATCTGAATCAGATTTTC  | FW       | 8.2                   |                 | 0.85  | -2610 | <sup>2</sup> upstream |      |
| 98224481    | 98224501                                                                                                                                                                          | ACATGATGATTTTGTCTCACT |                |                                                                                                                                                                                                        |                           | FW          | 7.1      | 0.785                 | -2455    | <sup>3</sup> upstream |                 |       |       |                       |      |
| 98222062    | 98222082                                                                                                                                                                          | CTTTGTCTGACTCAAGTCC   |                |                                                                                                                                                                                                        |                           | RC          | 10.2     | 0.773                 | -4874    | upstream              |                 |       |       |                       |      |
| 98222183    | 98222203                                                                                                                                                                          | TGTGTTGCAGTCTCACAGGGA |                |                                                                                                                                                                                                        |                           | RC          | 9.5      | 0.805                 | -4753    | upstream              |                 |       |       |                       |      |
| 98222210    | 98222230                                                                                                                                                                          | AGTCCTTGAGTCAGCAAGG   |                |                                                                                                                                                                                                        |                           | FW          | 11.1     | 0.865                 | -4726    | upstream              |                 |       |       |                       |      |
| 98223252    | 98223272                                                                                                                                                                          | TGAAGGGCTCCGTCATCAGTG |                |                                                                                                                                                                                                        |                           | RC          | 6.4      | 0.839                 | -3684    | upstream              |                 |       |       |                       |      |
| 98224911    | 98224931                                                                                                                                                                          | CGGCGGCATTTGCTACTGTG  |                |                                                                                                                                                                                                        |                           | RC          | 7.6      | 0.824                 | -2025    | upstream              |                 |       |       |                       |      |
| 98225106    | 98225126                                                                                                                                                                          | TGACCATGACAAGGCACAGCC |                |                                                                                                                                                                                                        |                           | FW          | 12.8     | 0.869                 | -1830    | upstream              |                 |       |       |                       |      |
| 98225347    | 98225367                                                                                                                                                                          | CCTGAGTGAGAAGCAGCCTG  |                |                                                                                                                                                                                                        |                           | FW          | 9.2      | 0.824                 | -1589    | upstream              |                 |       |       |                       |      |
| 98226996    | 98227016                                                                                                                                                                          | ACCGAGTGACTCAGGCTTTTG |                |                                                                                                                                                                                                        |                           | FW          | 11.3     | 0.811                 | 60       | UTR5                  |                 |       |       |                       |      |
| 98227574    | 98227594                                                                                                                                                                          | TGGGATGACAAGGCTGGAGC  |                |                                                                                                                                                                                                        |                           | FW          | 8        | 0.813                 | 638      | intron1               |                 |       |       |                       |      |
| 98228852    | 98228872                                                                                                                                                                          | AACTTTTCTTGGTCAAGCGGG |                |                                                                                                                                                                                                        |                           | RC          | 6.9      | 0.768                 | 1916     | intron1               |                 |       |       |                       |      |
| 98229284    | 98229304                                                                                                                                                                          | CAACTCTGACCAGGCTGTTGG |                |                                                                                                                                                                                                        |                           | FW          | 9.9      | 0.861                 | 2348     | intron1               |                 |       |       |                       |      |
| 98229646    | 98229666                                                                                                                                                                          | GGAATGTGAGAGAGCAGCAGT |                |                                                                                                                                                                                                        |                           | FW          | 7.9      | 0.82                  | 2710     | intron1               |                 |       |       |                       |      |
| 98230293    | 98230313                                                                                                                                                                          | CCTCTGTGACCTAGCCTCTGG |                |                                                                                                                                                                                                        |                           | FW          | 8.3      | 0.855                 | 3357     | intron2               |                 |       |       |                       |      |
| 98231654    | 98231674                                                                                                                                                                          | GATCCAGCATAGTCAATTTGT |                |                                                                                                                                                                                                        |                           | RC          | 10.2     | 0.86                  | 4718     | intron5               |                 |       |       |                       |      |
| Ndufa1      | NADH dehydrogenase (ubiquinone) 1 alpha subcomplex, 1<br>NM_019443 chrX 34727583 34731233 - chrX X A2<br>1-Ch12 Mafk chrX:34733735-34734146<br>2-Ch12 Mafk chrX:34733735-34734146 | NM_019443             | 34733815       | 34733835                                                                                                                                                                                               | casagattgactcagaggtgtgt   | FW          | 7.6      | 0.785                 | -2582    | <sup>1</sup> upstream | 1.31            |       |       |                       |      |
|             |                                                                                                                                                                                   |                       | 34734043       | 34734063                                                                                                                                                                                               | gtgagatgactcagcgggtaa     | FW          | 11.1     | 0.901                 | -2810    | <sup>2</sup> upstream |                 |       |       |                       |      |
|             |                                                                                                                                                                                   |                       | 34727671       | 34727691                                                                                                                                                                                               | ACCATAGCTGAGTAATTTCCT     | RC          | 9.4      | 0.808                 | 3562     | UTR3                  |                 |       |       |                       |      |
|             |                                                                                                                                                                                   |                       | 34727708       | 34727728                                                                                                                                                                                               | ATGCTTCCCTAGTCAATGTTT     | RC          | 9.2      | 0.809                 | 3525     | UTR3                  |                 |       |       |                       |      |
|             |                                                                                                                                                                                   |                       | 34728903       | 34728923                                                                                                                                                                                               | GGATTCTCACACAGCAGCGAA     | FW          | 6.6      | 0.797                 | 2330     | intron2               |                 |       |       |                       |      |
|             |                                                                                                                                                                                   |                       | 34729989       | 34730009                                                                                                                                                                                               | FATAAGTGACCCAGTAAAGAG     | FW          | 8        | 0.784                 | 1244     | intron1               |                 |       |       |                       |      |
|             |                                                                                                                                                                                   |                       | 34731028       | 34731048                                                                                                                                                                                               | CGGGATGACCAGCAGCACC       | FW          | 10.5     | 0.879                 | 205      | exon1                 |                 |       |       |                       |      |
|             |                                                                                                                                                                                   |                       | 34731127       | 34731147                                                                                                                                                                                               | CAGAGGTGACCCGGCTTTACC     | FW          | 6.5      | 0.82                  | 106      | UTR5                  |                 |       |       |                       |      |
|             |                                                                                                                                                                                   |                       | 34734437       | 34734457                                                                                                                                                                                               | ltaactgtcgaatcatctcaa     | RC          | 11.8     | 0.869                 | -3204    | upstream              |                 |       |       |                       |      |
|             |                                                                                                                                                                                   |                       | 34734930       | 34734950                                                                                                                                                                                               | cacccctgagcaagcaggttt     | FW          | 9        | 0.813                 | -3697    | upstream              |                 |       |       |                       |      |
| 34736143    | 34736163                                                                                                                                                                          | ggaagagctcagtcagaaagg | RC             | 7.9                                                                                                                                                                                                    | 0.875                     | -4910       | upstream |                       |          |                       |                 |       |       |                       |      |
| Ndufa10     | NADH dehydrogenase (ubiquinone) 1 alpha subcomplex 10<br>NM_024197 chr1 94336295 94370335 - chr1 D 1<br>1-Ch12 Nrf2 chr1:94370157-94370692                                        | NM_024197             | 94370308       | 94370328                                                                                                                                                                                               | AGGCCATGACTTCGGCTCTG      | FW          | 9.6      | 0.848                 | 27       | <sup>1</sup> exon1    | 1.47            |       |       |                       |      |
|             |                                                                                                                                                                                   |                       | 94365490       | 94365510                                                                                                                                                                                               | tcagaatcactcagcacaactt    | FW          | 10.2     | 0.809                 | 4845     | intron3               |                 |       |       |                       |      |
|             |                                                                                                                                                                                   |                       | 94368774       | 94368794                                                                                                                                                                                               | aaatcagctttttcaaatg       | RC          | 8.3      | 0.8                   | 1561     | intron1               |                 |       |       |                       |      |
|             |                                                                                                                                                                                   |                       | 94369651       | 94369671                                                                                                                                                                                               | GACAGTCTAATTCATAGTGG      | RC          | 13.6     | 0.878                 | 684      | intron1               |                 |       |       |                       |      |
|             |                                                                                                                                                                                   |                       | 94372727       | 94372747                                                                                                                                                                                               | cacaaatgactcagcacaat      | FW          | 12.1     | 0.867                 | -2392    | upstream              |                 |       |       |                       |      |
|             |                                                                                                                                                                                   |                       | 94373440       | 94373460                                                                                                                                                                                               | TGGGTGTAAGTCAGCACACC      | FW          | 7.3      | 0.764                 | -3105    | upstream              |                 |       |       |                       |      |
|             |                                                                                                                                                                                   |                       | 94374640       | 94374660                                                                                                                                                                                               | cctgtttcttggctatgatgt     | RC          | 9        | 0.786                 | -4305    | upstream              |                 |       |       |                       |      |
| Ndufa4      | NADH dehydrogenase (ubiquinone) 1 alpha subcomplex, 4<br>NM_010886 chr6 11850372 11857446 -                                                                                       | NM_010886             | 11856549       | 11856569                                                                                                                                                                                               | caecttgatccagaactgg       | FW          | 6.8      | 0.818                 | 897      | intron1               | 1.35            |       |       |                       |      |
|             |                                                                                                                                                                                   |                       | 11858200       | 11858220                                                                                                                                                                                               | TACCATCTAAGTCAATGTTC      | RC          | 7.6      | 0.802                 | -754     | upstream              |                 |       |       |                       |      |
|             |                                                                                                                                                                                   |                       | 11859361       | 11859381                                                                                                                                                                                               | CCATGTTGACTAAGAGAGCA      | FW          | 7.8      | 0.806                 | -1915    | upstream              |                 |       |       |                       |      |

| Gene symbol | Gene title/Transcript Info/Chromosomal location/ChIP-seq                                                                                                                                   | RefSeq Transcript ID   | ARE_start(mm9) | ARE_end(mm9)                                                                                                                                                                     | ARE_seq                 | Orientation | PWM      | MS                    | Dist_TSS | Location             | FI (SFN vs PBS) |       |                      |                       |      |
|-------------|--------------------------------------------------------------------------------------------------------------------------------------------------------------------------------------------|------------------------|----------------|----------------------------------------------------------------------------------------------------------------------------------------------------------------------------------|-------------------------|-------------|----------|-----------------------|----------|----------------------|-----------------|-------|----------------------|-----------------------|------|
| Ndufa5      | chr6 A2 6<br>NADH dehydrogenase (ubiquinone) 1 alpha subcomplex, 5<br>NM_026614 chr6:24468665-24477687 - chr6 6 A3<br>1-Ch12 Nrf2 chr6:24477327-24477965 Ese14 Mafk chr6:24477419-24477919 | NM_026614              | 11861815       | 11861835                                                                                                                                                                         | AAGCTGTGACAAAGTATCATA   | FW          | 7.9      | 0.778                 | -4369    | upstream             | 1.59            |       |                      |                       |      |
|             |                                                                                                                                                                                            |                        | 24477490       | 24477510                                                                                                                                                                         | CCATTCCGACGATCCAGGGTGA  | RC          | 10       | 0.793                 | 197      | <sup>1</sup> intron1 |                 |       |                      |                       |      |
|             |                                                                                                                                                                                            |                        | 24473216       | 24473236                                                                                                                                                                         | Lgagatcacagagcctaaagg   | FW          | 6.8      | 0.765                 | 4471     | intron2              |                 |       |                      |                       |      |
|             |                                                                                                                                                                                            |                        | 24481280       | 24481300                                                                                                                                                                         | GCTTCTGCTTAGTAATCGTGT   | RC          | 14.8     | 0.855                 | -3593    | upstream             |                 |       |                      |                       |      |
|             |                                                                                                                                                                                            |                        | 24482257       | 24482277                                                                                                                                                                         | TACCTTGCCATTTCATTCGCT   | RC          | 6.5      | 0.772                 | -4570    | upstream             |                 |       |                      |                       |      |
|             |                                                                                                                                                                                            |                        | 24482287       | 24482307                                                                                                                                                                         | AAAAGGTGACACTGCAGCCCT   | FW          | 10.9     | 0.872                 | -4600    | upstream             |                 |       |                      |                       |      |
|             |                                                                                                                                                                                            |                        | 24482593       | 24482613                                                                                                                                                                         | TTAATCTCTTAGTCAATGAGG   | RC          | 7.5      | 0.78                  | -4906    | upstream             |                 |       |                      |                       |      |
| Ndufa8      | NADH dehydrogenase (ubiquinone) 1 alpha subcomplex, 8<br>NM_026703 chr2:35891853-35904812 - chr2 B 2                                                                                       | NM_026703              | 35900448       | 35900468                                                                                                                                                                         | GAGCATCACAGAGCAGTGT     | FW          | 10.5     | 0.806                 | 4364     | intron1              | 1.34            |       |                      |                       |      |
|             |                                                                                                                                                                                            |                        | 35902060       | 35902080                                                                                                                                                                         | ACACAATCACTGAGCAATTC    | FW          | 10.6     | 0.814                 | 2752     | intron1              |                 |       |                      |                       |      |
|             |                                                                                                                                                                                            |                        | 35902253       | 35902273                                                                                                                                                                         | TCAAATTTACCCAGATCCTC    | FW          | 7.4      | 0.805                 | 2559     | intron1              |                 |       |                      |                       |      |
|             |                                                                                                                                                                                            |                        | 35902357       | 35902377                                                                                                                                                                         | AGTGTGTGACTGAGCCAGACA   | FW          | 8.3      | 0.875                 | 2455     | intron1              |                 |       |                      |                       |      |
|             |                                                                                                                                                                                            |                        | 35903367       | 35903387                                                                                                                                                                         | TCAAAATGACCAAGCCAAAGA   | FW          | 12       | 0.875                 | 1445     | intron1              |                 |       |                      |                       |      |
|             |                                                                                                                                                                                            |                        | 35906276       | 35906296                                                                                                                                                                         | TCAGGCTGATCTTGCAAATTA   | FW          | 8        | 0.781                 | -1464    | upstream             |                 |       |                      |                       |      |
|             |                                                                                                                                                                                            |                        | 35908257       | 35908277                                                                                                                                                                         | tcttaactcactgagccatctc  | FW          | 6.8      | 0.788                 | -3445    | upstream             |                 |       |                      |                       |      |
|             |                                                                                                                                                                                            |                        | 126798983      | 126799003                                                                                                                                                                        | CCGAGTGCAGTTTCACAGATG   | RC          | 7.1      | 0.789                 | 179      | <sup>1</sup> intron1 |                 |       |                      |                       |      |
|             |                                                                                                                                                                                            |                        | 126794455      | 126794475                                                                                                                                                                        | AATATGGCTATGTCACACAAC   | RC          | 9.6      | 0.859                 | 4707     | intron2              |                 |       |                      |                       |      |
|             |                                                                                                                                                                                            |                        | 126796463      | 126796483                                                                                                                                                                        | gctagatgactcaatggttaa   | FW          | 9.2      | 0.8                   | 2699     | intron1              |                 |       |                      |                       |      |
| 126797568   | 126797588                                                                                                                                                                                  | GGCTGTGAGAAATGCAATGA   | FW             | 7.1                                                                                                                                                                              | 0.773                   | 1594        | intron1  |                       |          |                      |                 |       |                      |                       |      |
| 126801379   | 126801399                                                                                                                                                                                  | AGTTTGGCCGAGTCAATCTCA  | RC             | 12.5                                                                                                                                                                             | 0.879                   | -2217       | upstream |                       |          |                      |                 |       |                      |                       |      |
| 126801846   | 126801866                                                                                                                                                                                  | cccagctGACCCAGTATTGAT  | FW             | 6.9                                                                                                                                                                              | 0.78                    | -2684       | upstream |                       |          |                      |                 |       |                      |                       |      |
| 126801913   | 126801933                                                                                                                                                                                  | TCTGAGCTCAGTAATGCCCA   | RC             | 7.2                                                                                                                                                                              | 0.784                   | -2751       | upstream |                       |          |                      |                 |       |                      |                       |      |
| 126802626   | 126802646                                                                                                                                                                                  | TGCCAGTGACAAAGCCAGCAG  | FW             | 10.8                                                                                                                                                                             | 0.865                   | -3464       | upstream |                       |          |                      |                 |       |                      |                       |      |
| 126802704   | 126802724                                                                                                                                                                                  | CCAGTGTGAATCAGGATCCTC  | FW             | 8.7                                                                                                                                                                              | 0.77                    | -3542       | upstream |                       |          |                      |                 |       |                      |                       |      |
| 126803962   | 126803982                                                                                                                                                                                  | AAATTAGCTTTTCATGAGTT   | RC             | 7.9                                                                                                                                                                              | 0.79                    | -4800       | upstream |                       |          |                      |                 |       |                      |                       |      |
| Ndufab1     | NADH dehydrogenase (ubiquinone) 1, alpha/beta subcomplex, 1<br>NM_028177 chr7:129231557-129245362 - chr7 F3 7 chr7 F3<br>1-Ch12 Mafk chr7:129242738-129243034                              | NM_028177              | 129242983      | 129243003                                                                                                                                                                        | TTAAACTGACACAGAGTGGT    | FW          | 9.2      | 0.796                 | 2379     | <sup>1</sup> intron1 | 1.61            |       |                      |                       |      |
|             |                                                                                                                                                                                            |                        | 129241531      | 129241551                                                                                                                                                                        | agaaaaatgactcgtcgtggtg  | FW          | 6.8      | 0.794                 | 3831     | intron1              |                 |       |                      |                       |      |
|             |                                                                                                                                                                                            |                        | 129242037      | 129242057                                                                                                                                                                        | ACTCATTAAATCAGCAACTA    | FW          | 7.4      | 0.769                 | 3325     | intron1              |                 |       |                      |                       |      |
|             |                                                                                                                                                                                            |                        | 129245143      | 129245163                                                                                                                                                                        | GCCTCCGCAAGTCAACCGCA    | RC          | 8.1      | 0.841                 | 219      | intron1              |                 |       |                      |                       |      |
|             |                                                                                                                                                                                            |                        | 129246109      | 129246129                                                                                                                                                                        | ataccatcaactctgcagccag  | FW          | 8.5      | 0.802                 | -747     | upstream             |                 |       |                      |                       |      |
|             |                                                                                                                                                                                            |                        | 129247244      | 129247264                                                                                                                                                                        | TGGAATCACTCAGCACACAG    | FW          | 7.7      | 0.82                  | -1882    | upstream             |                 |       |                      |                       |      |
|             |                                                                                                                                                                                            |                        | 129248624      | 129248644                                                                                                                                                                        | gatggctcactgagccatctt   | FW          | 9.1      | 0.839                 | -3262    | upstream             |                 |       |                      |                       |      |
|             |                                                                                                                                                                                            |                        | 129249137      | 129249157                                                                                                                                                                        | CATTCTGCCTTGCTATGGTCA   | RC          | 15.3     | 0.88                  | -3775    | upstream             |                 |       |                      |                       |      |
|             |                                                                                                                                                                                            |                        | Ndufb5         | NADH dehydrogenase (ubiquinone) 1 beta subcomplex, 5<br>NM_025316 chr3:32635984-32650481 + chr3 A3 3<br>1-Ch12 Nrf2 chr3:32635257-32636144<br>2-Ch12 Nrf2 chr3:32635257-32636144 | NM_025316               | 32635453    | 32635473 | GCGACTGCAAGTCAAGCTCT  | RC       | 10.4                 |                 | 0.852 | -531                 | <sup>1</sup> upstream | 1.37 |
| 32636041    | 32636061                                                                                                                                                                                   | CCGCGCTGACAGCGCTGCTT   |                |                                                                                                                                                                                  |                         | FW          | 6.7      | 0.813                 | 57       | <sup>2</sup> exon1   |                 |       |                      |                       |      |
| 32630972    | 32630992                                                                                                                                                                                   | GTAAGGCTATGTTATTCTTT   |                |                                                                                                                                                                                  |                         | RC          | 7        | 0.767                 | -5012    | upstream             |                 |       |                      |                       |      |
| 32632221    | 32632241                                                                                                                                                                                   | GGGAGGGCAGTGTAACTGTGA  |                |                                                                                                                                                                                  |                         | RC          | 9.3      | 0.767                 | -3763    | upstream             |                 |       |                      |                       |      |
| 32632459    | 32632479                                                                                                                                                                                   | TAGTGTGACCTCGTGTGAG    |                |                                                                                                                                                                                  |                         | FW          | 7.6      | 0.818                 | -3525    | upstream             |                 |       |                      |                       |      |
| 32633659    | 32633679                                                                                                                                                                                   | AGATGCCCCAGTCACTGCGC   |                |                                                                                                                                                                                  |                         | RC          | 10.8     | 0.859                 | -2325    | upstream             |                 |       |                      |                       |      |
| 32634350    | 32634370                                                                                                                                                                                   | GTGTGATGACAAAGGAAAAA   |                |                                                                                                                                                                                  |                         | FW          | 7.4      | 0.77                  | -1634    | upstream             |                 |       |                      |                       |      |
| 32635095    | 32635115                                                                                                                                                                                   | TAATTTGCAAAAGTATGTGFA  |                |                                                                                                                                                                                  |                         | RC          | 8.2      | 0.82                  | -889     | upstream             |                 |       |                      |                       |      |
| 32636475    | 32636495                                                                                                                                                                                   | CTCAGGGCAGAATCAGGGTGC  |                |                                                                                                                                                                                  |                         | RC          | 10       | 0.815                 | 491      | intron1              |                 |       |                      |                       |      |
| 32637486    | 32637506                                                                                                                                                                                   | GGCTTATGAGTCTGCAATTGC  |                |                                                                                                                                                                                  |                         | FW          | 7.1      | 0.789                 | 1502     | intron1              |                 |       |                      |                       |      |
| 32639745    | 32639765                                                                                                                                                                                   | AGAGACTGACCCAGCTTCATA  |                |                                                                                                                                                                                  |                         | FW          | 6.5      | 0.841                 | 3761     | intron1              |                 |       |                      |                       |      |
| Ndufb7      | NADH dehydrogenase (ubiquinone) 1 beta subcomplex, 7<br>NM_025843 chr8:86090656-86095522 + chr8 8 C3<br>1-Ch12 Nrf2 chr8:86090388-86090880                                                 | NM_025843              |                |                                                                                                                                                                                  |                         | 86090725    | 86090745 | GCGACCTGACCCCGCTATC   | FW       | 8                    | 0.821           | 69    | <sup>1</sup> exon1   | 1.43                  |      |
|             |                                                                                                                                                                                            |                        |                |                                                                                                                                                                                  |                         | 86086055    | 86086075 | atatagtgacacagagacaag | FW       | 6.7                  | 0.768           | -4601 | upstream             |                       |      |
|             |                                                                                                                                                                                            |                        |                |                                                                                                                                                                                  |                         | 86086244    | 86086264 | TGTGTGTGACACAGAGGAGTA | FW       | 7                    | 0.763           | -4412 | upstream             |                       |      |
|             |                                                                                                                                                                                            |                        | 86088839       | 86088859                                                                                                                                                                         | aaacccttaactaagccaactca | FW          | 8.1      | 0.795                 | -1817    | upstream             |                 |       |                      |                       |      |
|             |                                                                                                                                                                                            |                        | 86089880       | 86089900                                                                                                                                                                         | agggagggctcagtcattactg  | RC          | 9.9      | 0.881                 | -776     | upstream             |                 |       |                      |                       |      |
|             |                                                                                                                                                                                            |                        | 86091494       | 86091514                                                                                                                                                                         | CAGTACTGAATCTGCAGAAACA  | FW          | 7.6      | 0.809                 | 838      | intron1              |                 |       |                      |                       |      |
|             |                                                                                                                                                                                            |                        | 86091640       | 86091660                                                                                                                                                                         | CAAGTTGCTTCTCACTCCAG    | RC          | 7        | 0.807                 | 984      | intron1              |                 |       |                      |                       |      |
|             |                                                                                                                                                                                            |                        | 86091818       | 86091838                                                                                                                                                                         | CTCTTGTGAGAAGCAAGAGT    | FW          | 7.2      | 0.81                  | 1162     | intron1              |                 |       |                      |                       |      |
|             |                                                                                                                                                                                            |                        | 86092766       | 86092786                                                                                                                                                                         | tcaccttcccagtcactgtea   | RC          | 8.3      | 0.773                 | 2110     | intron1              |                 |       |                      |                       |      |
|             |                                                                                                                                                                                            |                        | 86094762       | 86094782                                                                                                                                                                         | CCCAGCTGACACTGCAGCAAC   | FW          | 10.3     | 0.86                  | 4106     | exon2                |                 |       |                      |                       |      |
|             |                                                                                                                                                                                            |                        | 86095214       | 86095234                                                                                                                                                                         | ACAGGGGCCAAGTCAGAAATC   | RC          | 7.8      | 0.838                 | 4558     | intron2              |                 |       |                      |                       |      |
|             |                                                                                                                                                                                            |                        | Ndufb8         | NADH dehydrogenase (ubiquinone) 1 beta subcomplex 8<br>NM_026061 chr19:44624743-44629905 - chr19 19 D1                                                                           | NM_026061               | 44625280    | 44625300 | TCTAAGTCACTCAGCTCTTAA | FW       | 7.9                  | 0.807           | 4625  | intron4              |                       | 1.50 |
|             |                                                                                                                                                                                            |                        |                |                                                                                                                                                                                  |                         | 44626407    | 44626427 | CTCTCATGACTCAGATACTTT | FW       | 7.7                  | 0.788           | 3498  | intron4              |                       |      |
|             |                                                                                                                                                                                            |                        |                |                                                                                                                                                                                  |                         | 44627402    | 44627422 | gctagtcctttgtcaacttga | RC       | 9.4                  | 0.791           | 2503  | intron3              |                       |      |
| 44629524    | 44629544                                                                                                                                                                                   | ACATGTCCTTGGTCATATGGA  |                |                                                                                                                                                                                  |                         | RC          | 8        | 0.774                 | 381      | exon2                |                 |       |                      |                       |      |
| 44629904    | 44629924                                                                                                                                                                                   | CGCGGTTCACTCTGCACATGC  |                |                                                                                                                                                                                  |                         | FW          | 6.7      | 0.779                 | 1        | UTR5                 |                 |       |                      |                       |      |
| 44630370    | 44630390                                                                                                                                                                                   | CTCGCTGACCCAGCCCAAA    |                |                                                                                                                                                                                  |                         | FW          | 7.9      | 0.855                 | -465     | upstream             |                 |       |                      |                       |      |
| 44630532    | 44630552                                                                                                                                                                                   | ACATTTTGAATGACAGCTAT   |                |                                                                                                                                                                                  |                         | FW          | 7.2      | 0.807                 | -627     | upstream             |                 |       |                      |                       |      |
| 44631697    | 44631717                                                                                                                                                                                   | gagttgctcttgatcatggtgt |                |                                                                                                                                                                                  |                         | RC          | 9        | 0.768                 | -1792    | upstream             |                 |       |                      |                       |      |
| 44634900    | 44634920                                                                                                                                                                                   | ttgggtgctctcactcctg    |                |                                                                                                                                                                                  |                         | RC          | 7.2      | 0.809                 | -4995    | upstream             |                 |       |                      |                       |      |
| Ndufb9      | NADH dehydrogenase (ubiquinone) 1 beta subcomplex, 9<br>NM_023172 chr15:58765364-58771044 + chr15 15 D2<br>1-Ch12 Mafk chr15:58769046-58769132                                             | NM_023172              |                |                                                                                                                                                                                  |                         | 58769047    | 58769067 | CGTTTTCCTGTCAGCATGT   | RC       | 12.2                 | 0.895           | 3683  | <sup>1</sup> intron3 | 1.46                  |      |
|             |                                                                                                                                                                                            |                        | 58760701       | 58760721                                                                                                                                                                         | TTGGTAGCTGACTCAGAGGGG   | RC          | 6.6      | 0.822                 | -4663    | upstream             |                 |       |                      |                       |      |
|             |                                                                                                                                                                                            |                        | 58762090       | 58762110                                                                                                                                                                         | CCACAATAACTCAGCACTCCG   | FW          | 13.7     | 0.866                 | -3274    | upstream             |                 |       |                      |                       |      |
|             |                                                                                                                                                                                            |                        | 58762551       | 58762571                                                                                                                                                                         | GTTTGGGCTTAGTAATCTTG    | RC          | 6.7      | 0.786                 | -2813    | upstream             |                 |       |                      |                       |      |
|             |                                                                                                                                                                                            |                        | 58762868       | 58762888                                                                                                                                                                         | TCAGTGTGACACAGGGCTCA    | FW          | 10.5     | 0.794                 | -2496    | upstream             |                 |       |                      |                       |      |
|             |                                                                                                                                                                                            |                        | 58763917       | 58763937                                                                                                                                                                         | CTTCAGGCTTTCTCACAGAGT   | RC          | 6.6      | 0.794                 | -1447    | upstream             |                 |       |                      |                       |      |

| Gene symbol   | Gene title/Transcript Info/Chromosomal location/ChIP-seq                                                                                                                                | RefSeq Transcript ID                                      | ARE_start(mm9) | ARE_end(mm9) | ARE_seq                 | Orientation | PWM  | MS    | Dist_TSS | Location              | FI (SFN vs PBS) |
|---------------|-----------------------------------------------------------------------------------------------------------------------------------------------------------------------------------------|-----------------------------------------------------------|----------------|--------------|-------------------------|-------------|------|-------|----------|-----------------------|-----------------|
|               |                                                                                                                                                                                         |                                                           | 58765786       | 58765806     | TAGTTTGCAGAGTAAGTCTCAGA | RC          | 11.6 | 0.811 | 422      | intron1               |                 |
|               |                                                                                                                                                                                         |                                                           | 58766944       | 58766964     | GGTGGTTGAATTAGTGTATT    | FW          | 6.4  | 0.805 | 1580     | intron1               |                 |
|               |                                                                                                                                                                                         |                                                           | 58767489       | 58767509     | CACGGGTGATCTAGCAGAAGA   | FW          | 7.9  | 0.807 | 2125     | intron1               |                 |
|               |                                                                                                                                                                                         |                                                           | 58767931       | 58767951     | ATTCTGGCAGAATCAGCATCC   | RC          | 7.3  | 0.791 | 2567     | exon2                 |                 |
|               |                                                                                                                                                                                         |                                                           | 58768936       | 58768956     | TCCTCTGAGAAGCAATGTA     | FW          | 10.9 | 0.832 | 3572     | exon3                 |                 |
|               |                                                                                                                                                                                         |                                                           | 58769854       | 58769874     | GCTTCTGCTTCTCAGTATCC    | RC          | 9.1  | 0.82  | 4490     | intron3               |                 |
|               |                                                                                                                                                                                         |                                                           | 58769925       | 58769945     | AGGCTTGCCAAGTGACAGTGA   | RC          | 8.8  | 0.795 | 4561     | intron3               |                 |
| <i>Ndufs1</i> | <b>NADH dehydrogenase (ubiquinone) Fe-S protein 1</b><br>NM_145518 chr1:63190165-63223396 - chr1 C2 1<br>1-Ch12 Nrf2 chr1:63223124-63224147<br>2-Ch12 Nrf2 chr1:63223124-63224147       | NM_001160038<br>NM_001160039<br>NM_001160040<br>NM_145518 | 63223225       | 63223245     | CTGGCCCTTAAGTCAATATGG   | RC          | 9.7  | 0.889 | 171      | <sup>1</sup> UTR5     | 1.63            |
|               |                                                                                                                                                                                         |                                                           | 63223946       | 63223966     | GGGACCGCGAGTCAGTGCTC    | RC          | 7.9  | 0.851 | -550     | <sup>2</sup> upstream |                 |
|               |                                                                                                                                                                                         |                                                           | 63218740       | 63218760     | tgccatgaaagcagcagcagc   | FW          | 6.4  | 0.797 | 4656     | intron1               |                 |
|               |                                                                                                                                                                                         |                                                           | 63218936       | 63218956     | CAAGTGTGAGACAGCCCTAGG   | FW          | 11   | 0.827 | 4460     | intron1               |                 |
|               |                                                                                                                                                                                         |                                                           | 63219248       | 63219268     | aaagtgccctagtcagccatc   | RC          | 9.1  | 0.839 | 4148     | intron1               |                 |
|               |                                                                                                                                                                                         |                                                           | 63220828       | 63220848     | CAATACTGAATTTGCAGATAC   | FW          | 7.8  | 0.801 | 2568     | intron1               |                 |
|               |                                                                                                                                                                                         |                                                           | 63222875       | 63222895     | TCCTGATGACAGGGCCATCTC   | FW          | 8.5  | 0.821 | 521      | intron1               |                 |
|               |                                                                                                                                                                                         |                                                           | 63224247       | 63224267     | ATATGGCTATGTCATTTACC    | RC          | 9    | 0.851 | -851     | upstream              |                 |
|               |                                                                                                                                                                                         |                                                           | 63225405       | 63225425     | GGAAAGTGAGGAAGCAAGAA    | FW          | 7.4  | 0.815 | -2009    | upstream              |                 |
|               |                                                                                                                                                                                         |                                                           | 63227820       | 63227840     | GAAAGGCCCTGTCAGGACCA    | RC          | 7.9  | 0.81  | -4424    | upstream              |                 |
|               |                                                                                                                                                                                         |                                                           | 63228237       | 63228257     | TGATGTGACTCAGTGGCAGA    | FW          | 7.8  | 0.789 | -4841    | upstream              |                 |
| <i>Ndufs2</i> | <b>NADH dehydrogenase (ubiquinone) Fe-S protein 2</b><br>NM_153064 chr1:173164983-173177253 - chr1 H3 1<br>1-Ch12 Nrf2 chr1:173177015-173177775<br>2-Ch12 Nrf2 chr1:173177015-173177775 | NM_153064                                                 | 173177014      | 173177034    | TACAGGGCTGGGTCACTTCT    | RC          | 8    | 0.769 | 239      | <sup>1</sup> intron1  | 1.44            |
|               |                                                                                                                                                                                         |                                                           | 173177128      | 173177148    | CTGGCTGACTGGCAAGCGG     | FW          | 8.2  | 0.855 | 125      | <sup>2</sup> exon1    |                 |
|               |                                                                                                                                                                                         |                                                           | 173172257      | 173172277    | attccccgcaaatcaattttg   | RC          | 7.4  | 0.781 | 4996     | intron2               |                 |
|               |                                                                                                                                                                                         |                                                           | 173174303      | 173174323    | GAACAGGCAAAAGTatata     | RC          | 6.8  | 0.832 | 2950     | intron2               |                 |
|               |                                                                                                                                                                                         |                                                           | 173174871      | 173174891    | ATTGTCTCTGTGTCATTACCG   | RC          | 7.6  | 0.762 | 2382     | intron2               |                 |
|               |                                                                                                                                                                                         |                                                           | 173175538      | 173175558    | AAAAGAGCTAAGTatcgtga    | RC          | 12.6 | 0.824 | 1715     | intron2               |                 |
|               |                                                                                                                                                                                         |                                                           | 173176191      | 173176211    | ACAACCTTGAACAGCAGCTCT   | FW          | 9.8  | 0.847 | 1062     | intron2               |                 |
|               |                                                                                                                                                                                         |                                                           | 173176481      | 173176501    | lctccttcaaaagtcattgctt  | RC          | 7.6  | 0.762 | 772      | intron1               |                 |
|               |                                                                                                                                                                                         |                                                           | 173176623      | 173176643    | TTCAATGCCAAGTCATGACA    | RC          | 11.6 | 0.88  | 630      | intron1               |                 |
|               |                                                                                                                                                                                         |                                                           | 173178702      | 173178722    | TTCACTGCTTAGTCACACTCT   | RC          | 15.3 | 0.937 | -1449    | upstream              |                 |
|               |                                                                                                                                                                                         |                                                           | 173180300      | 173180320    | TCATCAGCTGGCTCAGTGCCCT  | RC          | 6.4  | 0.792 | -3047    | upstream              |                 |
|               |                                                                                                                                                                                         |                                                           | 173180454      | 173180474    | TCCCAGTGACCAAGCTTCTGG   | FW          | 9.9  | 0.863 | -3201    | upstream              |                 |
|               |                                                                                                                                                                                         |                                                           | 173181008      | 173181028    | GGGGCTTGACTGGGCACTGGC   | FW          | 8.6  | 0.861 | -3755    | upstream              |                 |
|               |                                                                                                                                                                                         |                                                           | 173181045      | 173181065    | CTGCTTGCCGCTTCACACTGG   | RC          | 6.9  | 0.798 | -3792    | upstream              |                 |
| <i>Ndufs3</i> | <b>NADH dehydrogenase (ubiquinone) Fe-S protein 3</b><br>NM_026688 chr2:90734792-90744878 - chr2 E1 2<br>90746748                                                                       | NM_026688                                                 | 90741265       | 90741285     | ggacactgactgagagagaag   | FW          | 9    | 0.806 | 3613     | intron4               | 1.44            |
|               |                                                                                                                                                                                         |                                                           | 90742831       | 90742851     | tttatgtactactcatgatta   | RC          | 10   | 0.827 | 2047     | intron3               |                 |
|               |                                                                                                                                                                                         |                                                           | 90743779       | 90743799     | TCATGGTAAACAATGCAACAGT  | FW          | 9.1  | 0.769 | 1099     | intron2               |                 |
|               |                                                                                                                                                                                         |                                                           | 90746650       | 90746670     | TAAAAGCTGCATCACTTTTC    | RC          | 6.7  | 0.806 | -1772    | upstream              |                 |
|               |                                                                                                                                                                                         |                                                           | 90746748       | 90746768     | TGAAGATGAATCAGTATATCT   | FW          | 8.5  | 0.763 | -1870    | upstream              |                 |
|               |                                                                                                                                                                                         |                                                           | 90747107       | 90747127     | gtagtatgactcagtgatgta   | FW          | 9.1  | 0.804 | -2229    | upstream              |                 |
|               |                                                                                                                                                                                         |                                                           | 90747776       | 90747796     | gcttttgccgagtcactaaag   | RC          | 14.2 | 0.907 | -2898    | upstream              |                 |
| <i>Ndufs6</i> | <b>NADH dehydrogenase (ubiquinone) Fe-S protein 6</b><br>NM_010888 chr13:73457323-73465930 - chr13 D2 13<br>1-Ch12 Nrf2 chr13:73468214-73468625                                         | NM_010888<br>NR_033306                                    | 73468618       | 73468638     | CCGGCTGAGTGAGCTCCCGG    | FW          | 7.7  | 0.819 | -2688    | <sup>1</sup> upstream | 1.43            |
|               |                                                                                                                                                                                         |                                                           | 73461670       | 73461690     | TCAGGATGAAGATGCACTTAA   | FW          | 7.6  | 0.785 | 4260     | intron2               |                 |
|               |                                                                                                                                                                                         |                                                           | 73462562       | 73462582     | AGACAGTGACACTGGAGACCA   | FW          | 8.4  | 0.765 | 3368     | intron2               |                 |
|               |                                                                                                                                                                                         |                                                           | 73466336       | 73466356     | GGAAGTTTACCAGCATTGGA    | FW          | 6.5  | 0.796 | -406     | upstream              |                 |
|               |                                                                                                                                                                                         |                                                           | 73466813       | 73466833     | ccaggctaacctagcactcaac  | FW          | 7.5  | 0.789 | -883     | upstream              |                 |
|               |                                                                                                                                                                                         |                                                           | 73468724       | 73468744     | TCTGATGCCAAGTAACTTTGA   | RC          | 9.5  | 0.794 | -2794    | upstream              |                 |
|               |                                                                                                                                                                                         |                                                           | 73469363       | 73469383     | agctcggctcggtaaacctggg  | RC          | 7.1  | 0.769 | -3433    | upstream              |                 |
| <i>Ndufv1</i> | <b>NADH dehydrogenase (ubiquinone) flavoprotein 1</b><br>NM_133666 chr19:4007498-4012755 - chr19 A 19<br>1-Ch12 Nrf2 chr19:4012525-4013089                                              | NM_133666                                                 | 4012535        | 4012555      | ATCAGGGCCGGCTCACCTGTGC  | RC          | 7.2  | 0.779 | 220      | <sup>1</sup> intron1  | 1.41            |
|               |                                                                                                                                                                                         |                                                           | 4007741        | 4007761      | TTAGTGTGACACAGCAGG3CA   | FW          | 12.5 | 0.916 | 5014     | intron9               |                 |
|               |                                                                                                                                                                                         |                                                           | 4011037        | 4011057      | ACCCAGTGTCCAGCAGCCCC    | FW          | 8.3  | 0.834 | 1718     | intron3               |                 |
|               |                                                                                                                                                                                         |                                                           | 4011109        | 4011129      | CTGAGGGCTTATTTCATGAAGC  | RC          | 8.3  | 0.821 | 1646     | exon3                 |                 |
|               |                                                                                                                                                                                         |                                                           | 4011763        | 4011783      | CACGGAGCCATGTCACACTTC   | RC          | 6.9  | 0.817 | 992      | intron1               |                 |
|               |                                                                                                                                                                                         |                                                           | 4011872        | 4011892      | TCTCCCTAACTCTGCTGAAGA   | FW          | 7.3  | 0.767 | 883      | intron1               |                 |
|               |                                                                                                                                                                                         |                                                           | 4013601        | 4013621      | ccttcTGCCTTGTGAGCAGGA   | RC          | 12.7 | 0.894 | -846     | upstream              |                 |
|               |                                                                                                                                                                                         |                                                           | 4014075        | 4014095      | acagctcTgaagcagctctata  | FW          | 7.4  | 0.81  | -1320    | upstream              |                 |
|               |                                                                                                                                                                                         |                                                           | 4014188        | 4014208      | aATGTCTGACTTAGAAGTGTAT  | FW          | 6.7  | 0.788 | -1433    | upstream              |                 |
|               |                                                                                                                                                                                         |                                                           | 4014328        | 4014348      | gacctttgactaaaggattat   | FW          | 7.2  | 0.773 | -1573    | upstream              |                 |
|               |                                                                                                                                                                                         |                                                           | 4015900        | 4015920      | tgaggctgaaacagctttgtt   | FW          | 9.6  | 0.816 | -3145    | upstream              |                 |
| <i>Ndufv2</i> | <b>NADH dehydrogenase (ubiquinone) flavoprotein 2</b><br>NM_028388 chr17:66428134-66450899 - chr17 17 E1.2                                                                              | NM_028388                                                 | 66446613       | 66446633     | tatgctcctggctcagctctcc  | RC          | 10.2 | 0.8   | 4286     | intron1               | 1.44            |
|               |                                                                                                                                                                                         |                                                           | 66448375       | 66448395     | atggcttgactagcccaagga   | FW          | 8.2  | 0.872 | 2524     | intron1               |                 |
|               |                                                                                                                                                                                         |                                                           | 66450520       | 66450540     | TGACCTTGACTAAGTTAGGGG   | FW          | 6.7  | 0.777 | 379      | intron1               |                 |
|               |                                                                                                                                                                                         |                                                           | 66453906       | 66453926     | gaattgacttgatcagatgat   | RC          | 8.4  | 0.766 | -3007    | upstream              |                 |
|               |                                                                                                                                                                                         |                                                           | 66454281       | 66454301     | ttgcaactgacaagaagctct   | FW          | 7.4  | 0.77  | -3382    | upstream              |                 |
|               |                                                                                                                                                                                         |                                                           | 66455422       | 66455442     | gcttcggctgctgaagagca    | RC          | 10   | 0.793 | -4523    | upstream              |                 |
| <i>Ndufv3</i> | <b>NADH dehydrogenase (ubiquinone) flavoprotein 3</b><br>NM_030087 chr17:31657059-31668270 + chr17 B1 17                                                                                | NM_001083891<br>NM_030087                                 | 31653341       | 31653361     | cgatggtgagactgctctaaa   | FW          | 8.5  | 0.786 | -3718    | upstream              | 1.50            |
|               |                                                                                                                                                                                         |                                                           | 31656146       | 31656166     | AARTACTTACTGTGCACTGGG   | FW          | 6.4  | 0.769 | -913     | upstream              |                 |
|               |                                                                                                                                                                                         |                                                           | 31661516       | 31661536     | TATGTGctctatgctcttggat  | RC          | 8.8  | 0.769 | 4457     | intron2               |                 |
| <i>Nnmt</i>   | <b>nicotinamide N-methyltransferase</b>                                                                                                                                                 | NM_010924                                                 | 48408725       | 48408745     | gccccctgaaacagcagcaag   | FW          | 11.2 | 0.845 | 4503     | intron2               | 1.74            |
|               |                                                                                                                                                                                         |                                                           | 48408927       | 48408947     | TAAATGTCTGAGTCACACTCC   | RC          | 11.5 | 0.815 | 4301     | intron2               |                 |

| Gene symbol  | Gene title/Transcript Info/Chromosomal location/ChIP-seq                                                                                                      | RefSeq Transcript ID      | ARE_start(mm9) | ARE_end(mm9)                                                                      | ARE_seq                | Orientation | PWM      | MS                     | Dist_TSS | Location   | FI (SFN vs PBS) |       |          |         |      |
|--------------|---------------------------------------------------------------------------------------------------------------------------------------------------------------|---------------------------|----------------|-----------------------------------------------------------------------------------|------------------------|-------------|----------|------------------------|----------|------------|-----------------|-------|----------|---------|------|
|              | NM_010924 chr9 48399981 48413228 - chr9 A5.3 9 29.0 cM                                                                                                        |                           | 48411000       | 48411020                                                                          | aagccatgaatctgcagccaag | FW          | 9.9      | 0.826                  | 2228     | intron2    |                 |       |          |         |      |
|              |                                                                                                                                                               |                           | 48414522       | 48414542                                                                          | GGGTATGATTAAAGCAAGAGC  | FW          | 10.6     | 0.847                  | -1294    | upstream   |                 |       |          |         |      |
|              |                                                                                                                                                               |                           | 48415129       | 48415149                                                                          | gagaggtgactcagctcagct  | FW          | 7.2      | 0.785                  | -1901    | upstream   |                 |       |          |         |      |
|              |                                                                                                                                                               |                           | 48416004       | 48416024                                                                          | cattttctggaatgatcatgc  | RC          | 10.8     | 0.79                   | -2776    | upstream   |                 |       |          |         |      |
|              |                                                                                                                                                               |                           | 48416992       | 48417012                                                                          | tagccctgagatagctgagta  | FW          | 7.3      | 0.786                  | -3764    | upstream   |                 |       |          |         |      |
| <i>Nppa</i>  | natriuretic peptide type A<br>NM_008725 chr4 147374830 147376183 + chr4 E2 4 76.5 cM                                                                          | NM_008725                 | 147371202      | 147371222                                                                         | cgccatgacggagctcaacc   | FW          | 7.6      | 0.847                  | -3628    | upstream   | 31.75           |       |          |         |      |
|              |                                                                                                                                                               |                           | 147371562      | 147371582                                                                         | aaacctgcttctcagaggatg  | RC          | 9        | 0.813                  | -3268    | upstream   |                 |       |          |         |      |
|              |                                                                                                                                                               |                           | 147372531      | 147372551                                                                         | atatttgcaagtgactcgta   | RC          | 9.5      | 0.772                  | -2299    | upstream   |                 |       |          |         |      |
|              |                                                                                                                                                               |                           | 147372575      | 147372595                                                                         | gtagctgcaaaagtattttaa  | RC          | 7        | 0.776                  | -2255    | upstream   |                 |       |          |         |      |
|              |                                                                                                                                                               |                           | 147373549      | 147373569                                                                         | ACAGTGTGAACTTGCAAGAT   | FW          | 6.7      | 0.78                   | -1281    | upstream   |                 |       |          |         |      |
|              |                                                                                                                                                               |                           | 147373869      | 147373889                                                                         | TGGACTGCCTGCTCATGCTCC  | RC          | 6.4      | 0.776                  | -961     | upstream   |                 |       |          |         |      |
|              |                                                                                                                                                               |                           | 147375225      | 147375245                                                                         | AGGCCCTGAGTGAGCAGACTG  | FW          | 10       | 0.844                  | 395      | exon2      |                 |       |          |         |      |
|              |                                                                                                                                                               |                           | 147375967      | 147375987                                                                         | CAAGCAGCTTGGTCACATTGC  | RC          | 8.2      | 0.86                   | 1137     | UTR3       |                 |       |          |         |      |
|              |                                                                                                                                                               |                           | 147376671      | 147376691                                                                         | CCCAGCTGCGCTCACCACCT   | RC          | 11.8     | 0.901                  | 1841     | downstream |                 |       |          |         |      |
|              |                                                                                                                                                               |                           | 147377687      | 147377707                                                                         | CCAGCGTGAATGGCGGGAAA   | FW          | 8        | 0.792                  | 2857     | downstream |                 |       |          |         |      |
|              |                                                                                                                                                               |                           | 147377852      | 147377872                                                                         | ACATGGTGACAGGGCAGGGGC  | FW          | 9.7      | 0.856                  | 3022     | downstream |                 |       |          |         |      |
|              |                                                                                                                                                               |                           | 147377885      | 147377905                                                                         | GACTGGTGACAGGGCAGCAC   | FW          | 8.2      | 0.837                  | 3055     | downstream |                 |       |          |         |      |
|              |                                                                                                                                                               |                           | 147378673      | 147378693                                                                         | TGGTAGCTGAGTCAAGCTAA   | RC          | 9.9      | 0.903                  | 3843     | downstream |                 |       |          |         |      |
|              |                                                                                                                                                               |                           | 147378956      | 147378976                                                                         | TCCACGGCTTAGTTATAGTTC  | RC          | 8.5      | 0.801                  | 4126     | downstream |                 |       |          |         |      |
| <i>Nudt8</i> | nudix (nucleoside diphosphate linked moiety X)-type motif 8<br>NM_025529 chr19 4000579 4002102 + chr19 A 19                                                   | NM_025529                 | 3999701        | 3999721                                                                           | TCACAGTCACACAGCAAGTA   | FW          | 14.4     | 0.846                  | -878     | upstream   | 2.12            |       |          |         |      |
|              |                                                                                                                                                               |                           | 4002817        | 4002837                                                                           | GGTGAAGCCGAGTCAAGTAGA  | RC          | 6.6      | 0.85                   | 2238     | downstream |                 |       |          |         |      |
|              |                                                                                                                                                               |                           | 4003178        | 4003198                                                                           | GCCTCCTTACCAGCAGCAGG   | FW          | 8.3      | 0.798                  | 2599     | downstream |                 |       |          |         |      |
|              |                                                                                                                                                               |                           | 4003299        | 4003319                                                                           | CTCCTGTCTGACTCACACT    | RC          | 10.3     | 0.905                  | 2720     | downstream |                 |       |          |         |      |
|              |                                                                                                                                                               |                           | 4003335        | 4003355                                                                           | CCTCAGGCTCTGTACCCCTAC  | RC          | 8.4      | 0.859                  | 2756     | downstream |                 |       |          |         |      |
|              |                                                                                                                                                               |                           | 4003378        | 4003398                                                                           | GCAGTGTGACACAGCTCTCAA  | FW          | 13.1     | 0.902                  | 2799     | downstream |                 |       |          |         |      |
|              |                                                                                                                                                               |                           | 4005218        | 4005238                                                                           | TTCAAGCCTTACTCAACCCCA  | RC          | 7.5      | 0.811                  | 4639     | downstream |                 |       |          |         |      |
|              |                                                                                                                                                               |                           | 58945202       | 58945222                                                                          | CCTTACGCCAAGTACACAGCAG | RC          | 7.9      | 0.84                   | 4675     | exon6      |                 |       |          |         |      |
| <i>Obscn</i> | obscurin, cytoskeletal calmodulin and titin-interacting RhoGEF<br>NM_001171512 chr11 58807758 58949877 - chr11 B1.3 11<br>1-Ch12 Mafk chr11:58945062-58945977 | NM_001171512<br>NM_199152 | 58946226       | 58946246                                                                          | GGGACTGCAGAGTAAGCAGCG  | RC          | 6.9      | 0.78                   | 3651     | exon5      | 3.79            |       |          |         |      |
|              |                                                                                                                                                               |                           | 58946715       | 58946735                                                                          | CAATAGTGACAGGGCGTCC    | FW          | 7        | 0.818                  | 3162     | exon4      |                 |       |          |         |      |
|              |                                                                                                                                                               |                           | 58949829       | 58949849                                                                          | CCTTTGGCCGCTCAGGAAGC   | RC          | 7        | 0.822                  | 48       | exon1      |                 |       |          |         |      |
|              |                                                                                                                                                               |                           | 58950531       | 58950551                                                                          | CTGATGGCCTTGTCACTATTTC | RC          | 9        | 0.827                  | -654     | upstream   |                 |       |          |         |      |
|              |                                                                                                                                                               |                           | 58950692       | 58950712                                                                          | TGCCACTGATCCAGCGAGTGG  | FW          | 7.2      | 0.795                  | -815     | upstream   |                 |       |          |         |      |
|              |                                                                                                                                                               |                           | 58950844       | 58950864                                                                          | CTGCTTTGACACAGCTCCCG   | FW          | 6.4      | 0.858                  | -967     | upstream   |                 |       |          |         |      |
|              |                                                                                                                                                               |                           | 58951015       | 58951035                                                                          | CGGTTTGTGACTCACTGTCC   | RC          | 13.8     | 0.888                  | -1138    | upstream   |                 |       |          |         |      |
|              |                                                                                                                                                               |                           | 58951485       | 58951505                                                                          | TGTATTACCAAGTCACTGGCC  | RC          | 7.3      | 0.762                  | -1608    | upstream   |                 |       |          |         |      |
|              |                                                                                                                                                               |                           | 58952003       | 58952023                                                                          | CTGATGGCCTTGTCACTATTTC | RC          | 9        | 0.827                  | -2126    | upstream   |                 |       |          |         |      |
|              |                                                                                                                                                               |                           | 58953567       | 58953587                                                                          | GGGACTGCACACTGCTGTGTG  | FW          | 7.5      | 0.825                  | -3690    | upstream   |                 |       |          |         |      |
|              |                                                                                                                                                               |                           | <i>Oit1</i>    | oncoprotein induced transcript 1<br>NM_146050 chr14 9181461 9211277 - chr14 A1 14 | NM_146050              | 9206565     | 9206585  | CAGACATCTGAGTCAAGGCAA  | RC       | 6.6        |                 | 0.781 | 4712     | intron1 | 4.01 |
|              |                                                                                                                                                               |                           |                |                                                                                   |                        | 9206796     | 9206816  | AACCTGGCTGAGTGAGCAGGG  | RC       | 8.6        |                 | 0.804 | 4481     | intron1 |      |
|              |                                                                                                                                                               |                           |                |                                                                                   |                        | 9206943     | 9206963  | TTCACTTCTTAGTCAACAGTc  | RC       | 10.8       |                 | 0.814 | 4334     | intron1 |      |
| 9207778      | 9207798                                                                                                                                                       | gtccggccttgcctatggact     |                |                                                                                   |                        | RC          | 7.7      | 0.814                  | 3499     | intron1    |                 |       |          |         |      |
| 9207979      | 9207999                                                                                                                                                       | ggataagcacagtcagactcc     |                |                                                                                   |                        | RC          | 7.4      | 0.839                  | 3298     | intron1    |                 |       |          |         |      |
| 9209107      | 9209127                                                                                                                                                       | ACTTCTGAGATAGTAAATG       |                |                                                                                   |                        | FW          | 6.4      | 0.784                  | 2170     | intron1    |                 |       |          |         |      |
| 9209246      | 9209266                                                                                                                                                       | CATTATTGACTTGGCTAATTT     |                |                                                                                   |                        | FW          | 6.5      | 0.827                  | 2031     | intron1    |                 |       |          |         |      |
| 9209437      | 9209457                                                                                                                                                       | ccaaggtgacacggctgacca     |                |                                                                                   |                        | FW          | 9.5      | 0.848                  | 1840     | intron1    |                 |       |          |         |      |
| 9209695      | 9209715                                                                                                                                                       | GGAATGGTCTTCAAGCTTAA      |                |                                                                                   |                        | RC          | 6.4      | 0.801                  | 1582     | intron1    |                 |       |          |         |      |
| 9209952      | 9209972                                                                                                                                                       | CAACTGGCAAAGTCAAAACCTT    |                |                                                                                   |                        | RC          | 6.5      | 0.828                  | 1325     | intron1    |                 |       |          |         |      |
| 9210346      | 9210366                                                                                                                                                       | TCAGGAGCCGGAGTAATAATGA    |                |                                                                                   |                        | RC          | 6.9      | 0.774                  | 931      | intron1    |                 |       |          |         |      |
| 9210974      | 9210994                                                                                                                                                       | CTTGCTGCTTCTTCATCTTCC     |                |                                                                                   |                        | RC          | 6.8      | 0.811                  | 303      | intron1    |                 |       |          |         |      |
| 9211879      | 9211899                                                                                                                                                       | TCTAGGCTCTGTCAACCAACA     |                |                                                                                   |                        | RC          | 7.6      | 0.847                  | -602     | upstream   |                 |       |          |         |      |
| 9212577      | 9212597                                                                                                                                                       | tctgtccctcagtcaccctcc     |                |                                                                                   |                        | RC          | 8.3      | 0.783                  | -1300    | upstream   |                 |       |          |         |      |
| 9212943      | 9212963                                                                                                                                                       | gaatttcagggctcagaagtgt    |                |                                                                                   |                        | RC          | 11.7     | 0.872                  | -1666    | upstream   |                 |       |          |         |      |
| 9213884      | 9213904                                                                                                                                                       | TGAAATGCTCAGTCAGGCTCC     |                |                                                                                   |                        | RC          | 13.5     | 0.926                  | -2607    | upstream   |                 |       |          |         |      |
| 9214337      | 9214357                                                                                                                                                       | GGAACATAACCCAGCAATGCC     |                |                                                                                   |                        | FW          | 6.4      | 0.794                  | -3060    | upstream   |                 |       |          |         |      |
| 9214632      | 9214652                                                                                                                                                       | tgtgtgtgagatagcagagtgt    |                |                                                                                   |                        | FW          | 6.6      | 0.774                  | -3355    | upstream   |                 |       |          |         |      |
| 9215925      | 9215945                                                                                                                                                       | AATCGGTGACTAGGCATGAATA    |                |                                                                                   |                        | FW          | 11.2     | 0.878                  | -4648    | upstream   |                 |       |          |         |      |
| <i>Oxct1</i> | 3-oxoacid CoA transferase 1<br>NM_024188 chr15 3976427 4105344 + chr15 A1 15                                                                                  | NM_024188                 |                |                                                                                   |                        | 3972430     | 3972450  | gtggctctggaatcaccacaaa | RC       | 8.7        | 0.854           | -3997 | upstream | 1.31    |      |
|              |                                                                                                                                                               |                           | 3976148        | 3976168                                                                           | TGAGGGTCAGTCAGCAGCGTG  | FW          | 9.5      | 0.78                   | -279     | upstream   |                 |       |          |         |      |
|              |                                                                                                                                                               |                           | 3977377        | 3977397                                                                           | ACCCTGCTGGCTCAAGTTCA   | RC          | 8        | 0.828                  | 950      | intron1    |                 |       |          |         |      |
|              |                                                                                                                                                               |                           | 3978092        | 3978112                                                                           | TTCAAGACTGAGTCATTGCGT  | RC          | 9.8      | 0.806                  | 1665     | intron1    |                 |       |          |         |      |
|              |                                                                                                                                                               |                           | 3979127        | 3979147                                                                           | TCTGGTGTCTGTGACCCCTAA  | RC          | 15.2     | 0.927                  | 2700     | intron1    |                 |       |          |         |      |
|              |                                                                                                                                                               |                           | 3979617        | 3979637                                                                           | AACCTTCTGTGTCATGATTT   | RC          | 11.3     | 0.811                  | 3190     | intron1    |                 |       |          |         |      |
|              |                                                                                                                                                               |                           | 173122448      | 173122468                                                                         | FTTCCCTCAGTCAGGATCA    | RC          | 8        | 0.777                  | 3951     | intron1    | 1.59            |       |          |         |      |
| 173122671    | 173122691                                                                                                                                                     | GAAAGTCTTAGTCAAGCAGC      | RC             | 6.5                                                                               | 0.774                  | 3728        | intron1  |                        |          |            |                 |       |          |         |      |
| 173123229    | 173123249                                                                                                                                                     | ATTTGAGCAGTGAATGCTG       | RC             | 7.9                                                                               | 0.768                  | 3170        | intron1  |                        |          |            |                 |       |          |         |      |
| 173128098    | 173128118                                                                                                                                                     | gaattgtcttgctcagtgatgt    | RC             | 8.4                                                                               | 0.766                  | -1699       | upstream |                        |          |            |                 |       |          |         |      |
| 173128185    | 173128205                                                                                                                                                     | taggctgacctgctttttgt      | FW             | 7.5                                                                               | 0.806                  | -1786       | upstream |                        |          |            |                 |       |          |         |      |
| 173130208    | 173130228                                                                                                                                                     | gaattgccttgctcagtgatgt    | RC             | 9                                                                                 | 0.768                  | -3809       | upstream |                        |          |            |                 |       |          |         |      |
| <i>Pdha1</i> | pyruvate dehydrogenase E1 alpha 1<br>NM_008810                                                                                                                | NM_008810                 | 156572203      | 156572223                                                                         | CTACTGCTCTTTCACACTGC   | RC          | 9.9      | 0.835                  | 4159     | intron1    | 1.34            |       |          |         |      |
|              |                                                                                                                                                               |                           | 156572757      | 156572777                                                                         | AACATAGCTATCTCAAAATGA  | RC          | 6.8      | 0.796                  | 3605     | intron1    |                 |       |          |         |      |



| Gene symbol  | Gene title/Transcript Info/Chromosomal location/ChIP-seq                                                                                                                                                                                                                                                                                                                                                                                             | RefSeq Transcript ID      | ARE_start(mm9) | ARE_end(mm9)                                                                                             | ARE_seq                 | Orientation | PWM       | MS                       | Dist_TSS | Location              | FI (SFN vs PBS) |       |                       |          |      |
|--------------|------------------------------------------------------------------------------------------------------------------------------------------------------------------------------------------------------------------------------------------------------------------------------------------------------------------------------------------------------------------------------------------------------------------------------------------------------|---------------------------|----------------|----------------------------------------------------------------------------------------------------------|-------------------------|-------------|-----------|--------------------------|----------|-----------------------|-----------------|-------|-----------------------|----------|------|
|              | NM_008810 chrX 156560150 156576362 - chrX F3-F4 X 66.5 cM                                                                                                                                                                                                                                                                                                                                                                                            |                           | 156576247      | 156576267                                                                                                | AGCGCAGCAGACTCACCGGGC   | RC          | 6.9       | 0.795                    | 115      | UTR5                  |                 |       |                       |          |      |
|              |                                                                                                                                                                                                                                                                                                                                                                                                                                                      |                           | 156577638      | 156577658                                                                                                | gaagagtgactgaaggaagact  | FW          | 10        | 0.814                    | -1276    | upstream              |                 |       |                       |          |      |
|              |                                                                                                                                                                                                                                                                                                                                                                                                                                                      |                           | 156577963      | 156577983                                                                                                | AAAAAATTACAAGCCAAAGGC   | FW          | 7.2       | 0.766                    | -1601    | upstream              |                 |       |                       |          |      |
|              |                                                                                                                                                                                                                                                                                                                                                                                                                                                      |                           | 156578607      | 156578627                                                                                                | ACTTTGTGACTCTGTAGCAAA   | FW          | 6.9       | 0.777                    | -2245    | upstream              |                 |       |                       |          |      |
| <i>Pdhb</i>  | pyruvate dehydrogenase (lipoamide) beta<br>NM_024221 chr14 8998504 9005506 - chr14 A1 14<br>1-Ch12 Nrf2 chr14:9005203-9005957<br>2-Ch12 Nrf2 chr14:9005203-9005957<br>3-Ch12 Nrf2 chr14:9005203-9005957<br>4-Ch12 Mafk chr14:9007100-9007520 Ese14 Mafk chr14:9007154-9007633                                                                                                                                                                        | NM_024221                 | 9005500        | 9005520                                                                                                  | CCCGCTGCAGCAGCAATAG     | FW          | 10        | 0.87                     | 6        | <sup>1</sup> UTR5     | 1.44            |       |                       |          |      |
|              |                                                                                                                                                                                                                                                                                                                                                                                                                                                      |                           | 9005610        | 9005630                                                                                                  | CAAGCGCTATTTCATAGCCG    | RC          | 6.4       | 0.785                    | -104     | <sup>2</sup> upstream |                 |       |                       |          |      |
|              |                                                                                                                                                                                                                                                                                                                                                                                                                                                      |                           | 9005870        | 9005890                                                                                                  | GCTGGGACTGAGTCAGTCAG    | RC          | 6.4       | 0.78                     | -364     | <sup>3</sup> upstream |                 |       |                       |          |      |
|              |                                                                                                                                                                                                                                                                                                                                                                                                                                                      |                           | 9007328        | 9007348                                                                                                  | CTGATTGCTGAGTCATTAAG    | RC          | 13.3      | 0.934                    | -1822    | <sup>4</sup> upstream |                 |       |                       |          |      |
|              |                                                                                                                                                                                                                                                                                                                                                                                                                                                      |                           | 9001050        | 9001070                                                                                                  | ccacagtgactgagcactagc   | FW          | 9.3       | 0.769                    | 4456     | intron8               |                 |       |                       |          |      |
|              |                                                                                                                                                                                                                                                                                                                                                                                                                                                      |                           | 9001994        | 9002014                                                                                                  | TACCAGTGACTCTGTAGGCG    | FW          | 8.5       | 0.781                    | 3512     | intron7               |                 |       |                       |          |      |
|              |                                                                                                                                                                                                                                                                                                                                                                                                                                                      |                           | 9002109        | 9002129                                                                                                  | TAACAAGCTCACTCATTTCTA   | RC          | 8.6       | 0.824                    | 3397     | intron7               |                 |       |                       |          |      |
|              |                                                                                                                                                                                                                                                                                                                                                                                                                                                      |                           | 9003938        | 9003958                                                                                                  | TTGTATGCACCGCTACTAGG    | RC          | 7.6       | 0.844                    | 1568     | exon3                 |                 |       |                       |          |      |
|              |                                                                                                                                                                                                                                                                                                                                                                                                                                                      |                           | 9009275        | 9009295                                                                                                  | TCTGAATTACAAGCCAAAGG    | FW          | 9.1       | 0.773                    | -3769    | upstream              |                 |       |                       |          |      |
|              |                                                                                                                                                                                                                                                                                                                                                                                                                                                      |                           | <i>Pfkfb1</i>  | 6-phosphofructo-2-kinase/fructose-2,6-bisphosphatase 1<br>NM_008824 chrX 147024463 147078421 + chrX X F2 | NM_008824               | 147020255   | 147020275 | CCAAGTCACTCAGCCGAGCC     | FW       | 9.3                   |                 | 0.819 | -4208                 | upstream | 1.55 |
| 147020412    | 147020432                                                                                                                                                                                                                                                                                                                                                                                                                                            | TCTTGTGCTGTGAAGGAGGG      |                |                                                                                                          |                         | RC          | 11.2      | 0.815                    | -4051    | upstream              |                 |       |                       |          |      |
| 147023792    | 147023812                                                                                                                                                                                                                                                                                                                                                                                                                                            | AATGGATGAATAAGCAGGGCA     |                |                                                                                                          |                         | FW          | 7.9       | 0.835                    | -671     | upstream              |                 |       |                       |          |      |
| 147023887    | 147023907                                                                                                                                                                                                                                                                                                                                                                                                                                            | AACTATAACTTTGGATCCTA      |                |                                                                                                          |                         | FW          | 6.4       | 0.778                    | -576     | upstream              |                 |       |                       |          |      |
| 147024480    | 147024500                                                                                                                                                                                                                                                                                                                                                                                                                                            | AAGGGTGTCTCTCAGCCTTC      |                |                                                                                                          |                         | RC          | 7.2       | 0.81                     | 17       | UTR5                  |                 |       |                       |          |      |
| 147025829    | 147025849                                                                                                                                                                                                                                                                                                                                                                                                                                            | TCTGATGCTGAGTGAACCTTG     |                |                                                                                                          |                         | RC          | 7         | 0.817                    | 1366     | intron1               |                 |       |                       |          |      |
| 147027404    | 147027424                                                                                                                                                                                                                                                                                                                                                                                                                                            | GTTAATCCTGTGTACAGCAA      |                |                                                                                                          |                         | RC          | 10.1      | 0.8                      | 2941     | intron1               |                 |       |                       |          |      |
| 147027594    | 147027614                                                                                                                                                                                                                                                                                                                                                                                                                                            | ACTAAATGAAAAAGCAGAAACA    |                |                                                                                                          |                         | FW          | 7.8       | 0.817                    | 3131     | intron1               |                 |       |                       |          |      |
| 147028314    | 147028334                                                                                                                                                                                                                                                                                                                                                                                                                                            | TTTAGTGTGGCTCATCTCAG      |                |                                                                                                          |                         | RC          | 8.3       | 0.825                    | 3851     | intron1               |                 |       |                       |          |      |
| 147028370    | 147028390                                                                                                                                                                                                                                                                                                                                                                                                                                            | CTCTCTGCCAAGTAATGACTG     |                |                                                                                                          |                         | RC          | 7.9       | 0.772                    | 3907     | intron1               |                 |       |                       |          |      |
| <i>Phgdh</i> | 3-phosphoglycerate dehydrogenase pseudogene//3-phosphoglycerate dehydro<br>NM_016966 chr3 98117093 98143892 - chr18 B2 18 chr3 3 E1                                                                                                                                                                                                                                                                                                                  | NM_016966                 |                |                                                                                                          |                         | 98139921    | 98139941  | TAACCTGCCAATCATCTGCTT    | RC       | 8.3                   | 0.805           | 3971  | intron1               | 1.98     |      |
|              |                                                                                                                                                                                                                                                                                                                                                                                                                                                      |                           |                |                                                                                                          |                         | 98140052    | 98140072  | CCTGGCTGAGTCTGTCTTAA     | FW       | 6.9                   | 0.79            | 3840  | intron1               |          |      |
|              |                                                                                                                                                                                                                                                                                                                                                                                                                                                      |                           | 98140800       | 98140820                                                                                                 | AACTGTGCTAAGTCAAGTGAA   | RC          | 9.6       | 0.842                    | 3092     | intron1               |                 |       |                       |          |      |
|              |                                                                                                                                                                                                                                                                                                                                                                                                                                                      |                           | 98141524       | 98141544                                                                                                 | AGAATATGAAGCAGCAGAGGC   | FW          | 7.4       | 0.828                    | 2368     | intron1               |                 |       |                       |          |      |
|              |                                                                                                                                                                                                                                                                                                                                                                                                                                                      |                           | 98141745       | 98141765                                                                                                 | CAGCCAGCCAAAGTCAGCGCA   | RC          | 7.5       | 0.832                    | 2147     | intron1               |                 |       |                       |          |      |
|              |                                                                                                                                                                                                                                                                                                                                                                                                                                                      |                           | 98142178       | 98142198                                                                                                 | TGACTAGCTGTCTCAGAGTTG   | RC          | 7.8       | 0.811                    | 1714     | intron1               |                 |       |                       |          |      |
|              |                                                                                                                                                                                                                                                                                                                                                                                                                                                      |                           | 98142332       | 98142352                                                                                                 | TaggcatgagccagCCAGCTC   | FW          | 8.4       | 0.803                    | 1560     | intron1               |                 |       |                       |          |      |
|              |                                                                                                                                                                                                                                                                                                                                                                                                                                                      |                           | 98142821       | 98142841                                                                                                 | AAGTGTCTACAAGCAGAAAC    | FW          | 6.8       | 0.776                    | 1071     | intron1               |                 |       |                       |          |      |
|              |                                                                                                                                                                                                                                                                                                                                                                                                                                                      |                           | 98143833       | 98143853                                                                                                 | CTCCGGTGAATGGCAGGGTT    | FW          | 9.8       | 0.871                    | 59       | UTR5                  |                 |       |                       |          |      |
|              |                                                                                                                                                                                                                                                                                                                                                                                                                                                      |                           | 98145038       | 98145058                                                                                                 | TATCAATGATCCAGCGGGGGT   | FW          | 7         | 0.798                    | -1146    | upstream              |                 |       |                       |          |      |
|              |                                                                                                                                                                                                                                                                                                                                                                                                                                                      |                           | 98147284       | 98147304                                                                                                 | AACCCCTGACTATGTGCGAGA   | FW          | 6.9       | 0.833                    | -3392    | upstream              |                 |       |                       |          |      |
|              |                                                                                                                                                                                                                                                                                                                                                                                                                                                      |                           | <i>Phyh</i>    | phytanoyl-CoA hydroxylase<br>NM_010726 chr2 4840041 4859789 + chr2 A1 2                                  | NM_010726               | 4835142     | 4835162   | ccccctctaaactctgcccctctc | FW       | 6.4                   | 0.764           | -4899 | upstream              |          | 1.79 |
|              |                                                                                                                                                                                                                                                                                                                                                                                                                                                      |                           |                |                                                                                                          |                         | 4836751     | 4836771   | gacaggtgactaaagcatgtgg   | FW       | 12.5                  | 0.916           | -3290 | upstream              |          |      |
|              |                                                                                                                                                                                                                                                                                                                                                                                                                                                      |                           |                |                                                                                                          |                         | 4837016     | 4837036   | CAGAGAGCAGCGTCAGGGTGC    | RC       | 9.6                   | 0.847           | -3025 | upstream              |          |      |
| 4837243      | 4837263                                                                                                                                                                                                                                                                                                                                                                                                                                              | CATTTTGTGCTCTCACAGGTG     |                |                                                                                                          |                         | RC          | 12.9      | 0.853                    | -2798    | upstream              |                 |       |                       |          |      |
| 4837664      | 4837684                                                                                                                                                                                                                                                                                                                                                                                                                                              | agagagtgactgagaaaactctg   |                |                                                                                                          |                         | FW          | 7         | 0.793                    | -2377    | upstream              |                 |       |                       |          |      |
| 4842292      | 4842312                                                                                                                                                                                                                                                                                                                                                                                                                                              | GGTCATCTGGGTCTCACAGCTT    |                |                                                                                                          |                         | RC          | 7.1       | 0.784                    | 2251     | intron1               |                 |       |                       |          |      |
| 4843132      | 4843152                                                                                                                                                                                                                                                                                                                                                                                                                                              | caggcctgacaatgcacacact    |                |                                                                                                          |                         | FW          | 9.6       | 0.84                     | 3091     | intron1               |                 |       |                       |          |      |
| 4844168      | 4844188                                                                                                                                                                                                                                                                                                                                                                                                                                              | gcaggctgagaaaagccatggg    |                |                                                                                                          |                         | FW          | 9         | 0.804                    | 4127     | intron2               |                 |       |                       |          |      |
| <i>Pkm</i>   | pyruvate kinase, muscle<br>NM_011099 chr9 59504174 59527182 + chr9 B 9 52.0 cM<br>1-Ese14 Mafk chr9:59501181-59501609 Mel Mafk chr9:59501228-59501579 Mel Nrf2 chr9:59500015-59501972<br>2-Ese14 Mafk chr9:59501181-59501609 Mel Mafk chr9:59501228-59501579 Mel Nrf2 chr9:59500015-59501972<br>3-Ch12 Mafk chr9:59504823-59505744<br>4-Ch12 Mafk chr9:59504823-59505744<br>5-Ch12 Mafk chr9:59506743-59507873<br>6-Ch12 Mafk chr9:59506743-59507873 | NM_011099                 |                |                                                                                                          |                         | 59501325    | 59501345  | TGGCCATGACTCAGTTTGTGG    | FW       | 9.6                   | 0.8             | -2849 | <sup>1</sup> upstream | 1.24     |      |
|              |                                                                                                                                                                                                                                                                                                                                                                                                                                                      |                           |                |                                                                                                          |                         | 59501417    | 59501437  | TCTGCTGCTGACTCACTFACTG   | RC       | 15.1                  | 0.939           | -2757 | <sup>2</sup> upstream |          |      |
|              |                                                                                                                                                                                                                                                                                                                                                                                                                                                      |                           | 59505528       | 59505548                                                                                                 | GTAATAACCCAGTCATAGTAA   | RC          | 6.8       | 0.769                    | 1354     | <sup>3</sup> intron1  |                 |       |                       |          |      |
|              |                                                                                                                                                                                                                                                                                                                                                                                                                                                      |                           | 59505690       | 59505710                                                                                                 | TCTGGTCTGTGTCACTCCAG    | RC          | 8.7       | 0.791                    | 1516     | <sup>4</sup> intron1  |                 |       |                       |          |      |
|              |                                                                                                                                                                                                                                                                                                                                                                                                                                                      |                           | 59507037       | 59507057                                                                                                 | AGTGAATGACTGGCACAATTT   | FW          | 12.4      | 0.879                    | 2863     | <sup>5</sup> intron1  |                 |       |                       |          |      |
|              |                                                                                                                                                                                                                                                                                                                                                                                                                                                      |                           | 59507481       | 59507501                                                                                                 | ACTGTATGACGAAGAACAATTC  | FW          | 6.4       | 0.769                    | 3307     | <sup>6</sup> intron1  |                 |       |                       |          |      |
|              |                                                                                                                                                                                                                                                                                                                                                                                                                                                      |                           | 59502245       | 59502265                                                                                                 | TGCCCTGACTTAGCAGCAAAA   | FW          | 14.1      | 0.92                     | -1929    | upstream              |                 |       |                       |          |      |
|              |                                                                                                                                                                                                                                                                                                                                                                                                                                                      |                           | 59503172       | 59503192                                                                                                 | CCATAATAACCAAGCATTTAC   | FW          | 8.9       | 0.8                      | -1002    | upstream              |                 |       |                       |          |      |
|              |                                                                                                                                                                                                                                                                                                                                                                                                                                                      |                           | 59508565       | 59508585                                                                                                 | ACTTCTGCAAAAGTCACTCCCT  | RC          | 11.8      | 0.876                    | 4391     | intron1               |                 |       |                       |          |      |
|              |                                                                                                                                                                                                                                                                                                                                                                                                                                                      |                           | 59508821       | 59508841                                                                                                 | TACCCCTGATACCAGCACAATTT | FW          | 8.1       | 0.794                    | 4647     | intron1               |                 |       |                       |          |      |
|              |                                                                                                                                                                                                                                                                                                                                                                                                                                                      |                           | <i>Pla2g16</i> | phospholipase A2, group XVI<br>NM_139269 chr19 7631948 7663035 + chr19 A 19                              | NM_139269               | 7627235     | 7627255   | AAATTGGCATATTCACCGAGC    | RC       | 9.3                   | 0.794           | -4713 | upstream              |          | 1.61 |
|              |                                                                                                                                                                                                                                                                                                                                                                                                                                                      |                           |                |                                                                                                          |                         | 7627730     | 7627750   | ggagagtgactgagcagaagcc   | FW       | 10.9                  | 0.909           | -4218 | upstream              |          |      |
| 7628156      | 7628176                                                                                                                                                                                                                                                                                                                                                                                                                                              | ccagcagctgactcaagacaga    |                |                                                                                                          |                         | RC          | 8.4       | 0.831                    | -3792    | upstream              |                 |       |                       |          |      |
| 7628769      | 7628789                                                                                                                                                                                                                                                                                                                                                                                                                                              | GCTATTGCCATGTTATGGTGC     |                |                                                                                                          |                         | RC          | 10.3      | 0.777                    | -3179    | upstream              |                 |       |                       |          |      |
| 7629280      | 7629300                                                                                                                                                                                                                                                                                                                                                                                                                                              | agagaaTGAGAATGCATTTgt     |                |                                                                                                          |                         | FW          | 9.5       | 0.792                    | -2668    | upstream              |                 |       |                       |          |      |
| 7632788      | 7632808                                                                                                                                                                                                                                                                                                                                                                                                                                              | TGAAGTTGATTTCTGCTTATTT    |                |                                                                                                          |                         | FW          | 6.6       | 0.792                    | 840      | intron2               |                 |       |                       |          |      |
| 7633330      | 7633350                                                                                                                                                                                                                                                                                                                                                                                                                                              | ATAGCAGCAGAGTCACTCCAG     |                |                                                                                                          |                         | RC          | 9.7       | 0.86                     | 1382     | intron2               |                 |       |                       |          |      |
| 7636254      | 7636274                                                                                                                                                                                                                                                                                                                                                                                                                                              | GGCTTTGCAGAGTGAGACTGA     |                |                                                                                                          |                         | RC          | 9.2       | 0.804                    | 4306     | intron2               |                 |       |                       |          |      |
| <i>Plin4</i> | perilipin 4<br>NM_020568 chr17 56240013 56249225 - chr17 17 D                                                                                                                                                                                                                                                                                                                                                                                        | NM_020568                 |                |                                                                                                          |                         | 56247203    | 56247223  | CTGGGGTGACACAGATGTGTT    | FW       | 7                     | 0.763           | 2022  | intron4               | 2.74     |      |
|              |                                                                                                                                                                                                                                                                                                                                                                                                                                                      |                           | 56248455       | 56248475                                                                                                 | CAGAATGCTGTGTATCCCGAG   | RC          | 8.9       | 0.808                    | 770      | intron3               |                 |       |                       |          |      |
|              |                                                                                                                                                                                                                                                                                                                                                                                                                                                      |                           | 56249131       | 56249151                                                                                                 | TCTGGGTGACACAGCAGCTCG   | FW          | 14.9      | 0.924                    | 94       | UTR5                  |                 |       |                       |          |      |
|              |                                                                                                                                                                                                                                                                                                                                                                                                                                                      |                           | 56250166       | 56250186                                                                                                 | GTGAAGTGACTGGGGCAGAGTG  | FW          | 8.1       | 0.861                    | -941     | upstream              |                 |       |                       |          |      |
|              |                                                                                                                                                                                                                                                                                                                                                                                                                                                      |                           | 56251522       | 56251542                                                                                                 | GGATCTGCAGACTCAGCCCTCC  | RC          | 10        | 0.828                    | -2297    | upstream              |                 |       |                       |          |      |
| <i>Plin5</i> | perilipin 5<br>NM_001077348 chr17 56251023 56256721 - NM_025874                                                                                                                                                                                                                                                                                                                                                                                      | NM_001077348<br>NM_025874 | 56253925       | 56253945                                                                                                 | TAAAGTTCAGGTGcatggtag   | RC          | 10.3      | 0.776                    | 2796     | intron5               | 2.80            |       |                       |          |      |
|              |                                                                                                                                                                                                                                                                                                                                                                                                                                                      |                           | 56254519       | 56254539                                                                                                 | GCTCAGCCCTCAGTCATGGGCA  | RC          | 7.3       | 0.773                    | 2202     | exon5                 |                 |       |                       |          |      |
|              |                                                                                                                                                                                                                                                                                                                                                                                                                                                      |                           | 56254949       | 56254969                                                                                                 | CCAAGGCCCTGGTCACTCTTA   | RC          | 7.1       | 0.807                    | 1772     | intron4               |                 |       |                       |          |      |

| Gene symbol    | Gene title/Transcript Info/Chromosomal location/ChIP-seq                                                                     | RefSeq Transcript ID   | ARE_start(mm9) | ARE_end(mm9)                                                                                                               | ARE_seq                   | Orientation | PWM      | MS                     | Dist_TSS | Location              | FI (SFN vs PBS) |       |          |                      |       |
|----------------|------------------------------------------------------------------------------------------------------------------------------|------------------------|----------------|----------------------------------------------------------------------------------------------------------------------------|---------------------------|-------------|----------|------------------------|----------|-----------------------|-----------------|-------|----------|----------------------|-------|
|                | chr17 D 17                                                                                                                   |                        | 56256970       | 56256990                                                                                                                   | CCCACCTGAGTCAGCCCTCCG     | FW          | 8.7      | 0.834                  | 1        | UTR5                  |                 |       |          |                      |       |
|                |                                                                                                                              |                        | 56258090       | 56258110                                                                                                                   | taaatgctgctttaatcctga     | RC          | 12.1     | 0.773                  | -1119    | upstream              |                 |       |          |                      |       |
|                |                                                                                                                              |                        | 56258220       | 56258240                                                                                                                   | AGTTTGGCCAGTcatatgct      | RC          | 9        | 0.863                  | -1249    | upstream              |                 |       |          |                      |       |
|                |                                                                                                                              |                        | 56258490       | 56258510                                                                                                                   | gccagcttacagagcaagttc     | FW          | 7.2      | 0.783                  | -1519    | upstream              |                 |       |          |                      |       |
|                |                                                                                                                              |                        | 56260162       | 56260182                                                                                                                   | CGGGCAGCTGCGTCAGGTTGG     | RC          | 7.9      | 0.87                   | -3191    | upstream              |                 |       |          |                      |       |
|                |                                                                                                                              |                        | 56260270       | 56260290                                                                                                                   | CCGACTGCAGTATCAGGCATT     | RC          | 6.9      | 0.784                  | -3299    | upstream              |                 |       |          |                      |       |
|                |                                                                                                                              |                        | 56260818       | 56260838                                                                                                                   | TCGTGTTCACTTCGCAAGCC      | FW          | 6.6      | 0.785                  | -3847    | upstream              |                 |       |          |                      |       |
|                |                                                                                                                              |                        | 56261401       | 56261421                                                                                                                   | CCCAGGGCCGGTCAACATTG      | RC          | 6.6      | 0.822                  | -4430    | upstream              |                 |       |          |                      |       |
|                |                                                                                                                              |                        | 56261563       | 56261583                                                                                                                   | AGGACTGAGTTGCAATAAG       | FW          | 8.2      | 0.797                  | -4592    | upstream              |                 |       |          |                      |       |
|                |                                                                                                                              |                        | <i>Pln</i>     | phospholamban<br>NM_023129 chr10 53057491 53065805 +<br>chr10 B3 10                                                        | NM_001141927<br>NM_023129 | 53052965    | 53052985 | taaagtctggaatcaatgct   | RC       | 14.8                  |                 | 0.895 | -4526    | upstream             | 10.13 |
| 53054283       | 53054303                                                                                                                     | ATGCTGTGCATAGTAATATA   |                |                                                                                                                            |                           | FW          | 8.2      | 0.78                   | -3208    | upstream              |                 |       |          |                      |       |
| 53055136       | 53055156                                                                                                                     | CCCAGGGCATGTCACCGATT   |                |                                                                                                                            |                           | RC          | 6.8      | 0.808                  | -2355    | upstream              |                 |       |          |                      |       |
| 53055467       | 53055487                                                                                                                     | ACTCCATCAGAGTCATATGA   |                |                                                                                                                            |                           | RC          | 8.4      | 0.767                  | -2024    | upstream              |                 |       |          |                      |       |
| 53059460       | 53059480                                                                                                                     | GTTGCCGAGTGTCAATTCCT   |                |                                                                                                                            |                           | RC          | 8.3      | 0.828                  | 1969     | intron1               |                 |       |          |                      |       |
| 53059670       | 53059690                                                                                                                     | TATAAATTACACAGCATAAGC  |                |                                                                                                                            |                           | FW          | 9.7      | 0.808                  | 2179     | intron1               |                 |       |          |                      |       |
| 53060796       | 53060816                                                                                                                     | ggacactgatatagctgtctc  |                |                                                                                                                            |                           | FW          | 6.6      | 0.791                  | 3305     | intron1               |                 |       |          |                      |       |
| 53061015       | 53061035                                                                                                                     | aagatggcctagtcagccatc  |                |                                                                                                                            |                           | RC          | 9.1      | 0.839                  | 3524     | intron1               |                 |       |          |                      |       |
| 53062321       | 53062341                                                                                                                     | tcagcttaactctgctctccg  |                |                                                                                                                            |                           | FW          | 7.5      | 0.775                  | 4830     | intron1               |                 |       |          |                      |       |
| <i>Pnpla3</i>  | patatin-like phospholipase domain containing 3<br>NM_054088 chr15 83998245 84019951 +<br>chr15 15 E3                         | NM_054088              |                |                                                                                                                            |                           | 83993594    | 83993614 | TCACAGTGACTCTGTTTCCCA  | FW       | 6.7                   | 0.765           | -4651 | upstream | 3.03                 |       |
|                |                                                                                                                              |                        | 83997432       | 83997452                                                                                                                   | gtccagctggaatcactgaag     | RC          | 10.3     | 0.901                  | -813     | upstream              |                 |       |          |                      |       |
|                |                                                                                                                              |                        | 83997598       | 83997618                                                                                                                   | ctactcttacagagcaccaga     | FW          | 6.5      | 0.785                  | -647     | upstream              |                 |       |          |                      |       |
|                |                                                                                                                              |                        | 83998730       | 83998750                                                                                                                   | CTGTGAGCTGGGTCAATCCCTG    | RC          | 10       | 0.867                  | 485      | intron1               |                 |       |          |                      |       |
|                |                                                                                                                              |                        | 61107968       | 61107988                                                                                                                   | catgatgactgtagctgca       | FW          | 8.4      | 0.863                  | -3400    | upstream              |                 |       |          |                      |       |
| <i>Ppa1</i>    | pyrophosphatase (inorganic) 1<br>NM_026438 chr10 61111368 61136913 +<br>chr10 B4 10 36.0 cM                                  | NM_026438              | 61108526       | 61108546                                                                                                                   | aaatagtgactgggatgctt      | FW          | 6.9      | 0.763                  | -2842    | upstream              | 1.85            |       |          |                      |       |
|                |                                                                                                                              |                        | 61108813       | 61108833                                                                                                                   | tctggttgactaaagaacaa      | FW          | 7.6      | 0.798                  | -2555    | upstream              |                 |       |          |                      |       |
|                |                                                                                                                              |                        | 61109258       | 61109278                                                                                                                   | AAACCAATACCAAGCAGTGA      | FW          | 10.3     | 0.804                  | -2110    | upstream              |                 |       |          |                      |       |
|                |                                                                                                                              |                        | 61111713       | 61111733                                                                                                                   | GAAACCACTGAGTCAACCTTA     | RC          | 13.4     | 0.824                  | 345      | intron1               |                 |       |          |                      |       |
|                |                                                                                                                              |                        | 61112515       | 61112535                                                                                                                   | ACTCCTTGACTTTGGATTAGG     | FW          | 6.6      | 0.762                  | 1147     | intron1               |                 |       |          |                      |       |
|                |                                                                                                                              |                        | 61113885       | 61113905                                                                                                                   | tcaaatgacagagcactttt      | FW          | 11.3     | 0.816                  | 2517     | intron1               |                 |       |          |                      |       |
|                |                                                                                                                              |                        | 61114916       | 61114936                                                                                                                   | GGTTGGTAGTTGCAACAG        | FW          | 6.4      | 0.792                  | 3548     | intron2               |                 |       |          |                      |       |
|                |                                                                                                                              |                        | 61115004       | 61115024                                                                                                                   | GAAATCTAACTTAGCAGATTG     | FW          | 8.5      | 0.815                  | 3636     | intron2               |                 |       |          |                      |       |
|                |                                                                                                                              |                        | <i>Pparg1a</i> | peroxisome proliferative activated receptor, gamma, coactivator 1 alpha<br>NM_008904 chr5 51845487 51945160 -<br>chr5 C1 5 | NM_008904<br>NR_027710    | 51943427    | 51943447 | GAATTCTGACTTAAGCAAAATC | FW       | 7.8                   |                 | 0.776 | 1733     | intron1              | 1.76  |
|                |                                                                                                                              |                        |                |                                                                                                                            |                           | 51945151    | 51945171 | GTCACATGACAAAGCTATTAA  | FW       | 8.9                   |                 | 0.855 | 9        | UTR3                 |       |
| 51945487       | 51945507                                                                                                                     | TGTTACTGACACAGTAACCTAC |                |                                                                                                                            |                           | FW          | 7.5      | 0.78                   | -327     | upstream              |                 |       |          |                      |       |
| 51946291       | 51946311                                                                                                                     | GTCGTTCTGAGTCAATGAGG   |                |                                                                                                                            |                           | RC          | 9.3      | 0.821                  | -1131    | upstream              |                 |       |          |                      |       |
| 51947355       | 51947375                                                                                                                     | ACTAGATAACTCTGCATTATT  |                |                                                                                                                            |                           | FW          | 9.5      | 0.802                  | -2195    | upstream              |                 |       |          |                      |       |
| 51947525       | 51947545                                                                                                                     | agaaaCTAACCCAGCAGTCC   |                |                                                                                                                            |                           | FW          | 6.6      | 0.794                  | -2365    | upstream              |                 |       |          |                      |       |
| 51948427       | 51948447                                                                                                                     | TATGGTGTGTTGTAACCTAAT  |                |                                                                                                                            |                           | RC          | 9.4      | 0.807                  | -3267    | upstream              |                 |       |          |                      |       |
| 51950151       | 51950171                                                                                                                     | AAAGTGTGACTGTGCCCAA    |                |                                                                                                                            |                           | FW          | 8.6      | 0.848                  | -4991    | upstream              |                 |       |          |                      |       |
| <i>Pparg1b</i> | peroxisome proliferative activated receptor, gamma, coactivator 1 beta<br>NM_133249 chr18 61457789 61560085 -<br>chr18 E1 18 | NM_133249              |                |                                                                                                                            |                           | 61555869    | 61555889 | Ltcttcttgacagagcaatttc | FW       | 10                    | 0.884           | 4216  | intron1  | 1.50                 |       |
|                |                                                                                                                              |                        |                |                                                                                                                            |                           | 61556555    | 61556575 | ggactctgcttatataatgt   | RC       | 7.6                   | 0.777           | 3530  | intron1  |                      |       |
|                |                                                                                                                              |                        | 61557447       | 61557467                                                                                                                   | ccaggatcaccagccagaga      | FW          | 8.6      | 0.789                  | 2638     | intron1               |                 |       |          |                      |       |
|                |                                                                                                                              |                        | 61557554       | 61557574                                                                                                                   | tgggtggctctgtcaccacct     | RC          | 7.7      | 0.848                  | 2531     | intron1               |                 |       |          |                      |       |
|                |                                                                                                                              |                        | 61560041       | 61560061                                                                                                                   | CGTGCCGCGAGTCAGCGCG       | RC          | 8.4      | 0.852                  | 44       | UTR5                  |                 |       |          |                      |       |
|                |                                                                                                                              |                        | 61560990       | 61561010                                                                                                                   | ACTCCATCTGAGTCACTCTGT     | RC          | 10.8     | 0.814                  | -905     | upstream              |                 |       |          |                      |       |
|                |                                                                                                                              |                        | 61562687       | 61562707                                                                                                                   | GCTGCTGTAATCAACTTGG       | RC          | 11       | 0.874                  | -2602    | upstream              |                 |       |          |                      |       |
|                |                                                                                                                              |                        | 61562913       | 61562933                                                                                                                   | TCAAGGGCTTTATCACTGATC     | RC          | 7.7      | 0.794                  | -2828    | upstream              |                 |       |          |                      |       |
|                |                                                                                                                              |                        | 61563480       | 61563500                                                                                                                   | CAATAGGCTGAATCACACTAT     | RC          | 9.9      | 0.847                  | -3395    | upstream              |                 |       |          |                      |       |
|                |                                                                                                                              |                        | 61564110       | 61564130                                                                                                                   | Acccggctctgctcacttagt     | RC          | 7.6      | 0.852                  | -4025    | upstream              |                 |       |          |                      |       |
| <i>Ppp1r3a</i> | protein phosphatase 1, regulatory (inhibitor) subunit 3A<br>NM_080464 chr6 14663821 14705274 -<br>chr6 A2 6                  | NM_080464              | 14700724       | 14700744                                                                                                                   | aaagtggcctagtcagccatc     | RC          | 8.6      | 0.836                  | 4550     | intron1               | 1.44            |       |          |                      |       |
|                |                                                                                                                              |                        | 14705336       | 14705356                                                                                                                   | TACAGTTGACATTGCAAAAAGA    | FW          | 7.8      | 0.831                  | -62      | upstream              |                 |       |          |                      |       |
|                |                                                                                                                              |                        | 14707073       | 14707093                                                                                                                   | gatggctgactagccactctt     | FW          | 9.1      | 0.839                  | -1799    | upstream              |                 |       |          |                      |       |
|                |                                                                                                                              |                        | 14707210       | 14707230                                                                                                                   | CCTCTGTGAATGAGCTCTCCT     | FW          | 6.6      | 0.818                  | -1936    | upstream              |                 |       |          |                      |       |
|                |                                                                                                                              |                        | 14707834       | 14707854                                                                                                                   | AGCAGTACAGAGTCAATAATA     | RC          | 6.8      | 0.772                  | -2560    | upstream              |                 |       |          |                      |       |
|                |                                                                                                                              |                        | 14708980       | 14709000                                                                                                                   | AAAAGAGCTTTGTCACCAAAA     | RC          | 10.1     | 0.862                  | -3706    | upstream              |                 |       |          |                      |       |
|                |                                                                                                                              |                        | <i>Prdx3</i>   | peroxiredoxin 3<br>NM_007452 chr19 60939968 60950441 -<br>chr19 D3 19 50.0 cM<br>1-Mel Mafk chr19:60947838-60948795        | NM_007452                 | 60948005    | 60948025 | actgactgacttagctctcac  | FW       | 9.5                   |                 | 0.881 | 2436     | <sup>1</sup> intron2 | 1.34  |
|                |                                                                                                                              |                        |                |                                                                                                                            |                           | 60945992    | 60946012 | TCATTGGCTTTGTCAGTAAA   | RC       | 10.9                  |                 | 0.867 | 4449     | exon4                |       |
| 60949405       | 60949425                                                                                                                     | CTAACTGCTGCATCATGTAGC  |                |                                                                                                                            |                           | RC          | 9.3      | 0.837                  | 1036     | intron1               |                 |       |          |                      |       |
| 60950563       | 60950583                                                                                                                     | TGTTTGTGACTTAGGGGAGAA  |                |                                                                                                                            |                           | FW          | 6.6      | 0.768                  | -122     | upstream              |                 |       |          |                      |       |
| 60951160       | 60951180                                                                                                                     | ctttatgcttaactcattttaa |                |                                                                                                                            |                           | RC          | 6.9      | 0.811                  | -719     | upstream              |                 |       |          |                      |       |
| 60952414       | 60952434                                                                                                                     | tctacttgactctgctcccaag |                |                                                                                                                            |                           | FW          | 7        | 0.85                   | -1973    | upstream              |                 |       |          |                      |       |
| 60952929       | 60952949                                                                                                                     | ggcaatgcaaaactcaccatca |                |                                                                                                                            |                           | RC          | 8.4      | 0.812                  | -2488    | upstream              |                 |       |          |                      |       |
| 60953193       | 60953213                                                                                                                     | TTATATGACAGTGTGAAAGTCA |                |                                                                                                                            |                           | RC          | 6.8      | 0.769                  | -2752    | upstream              |                 |       |          |                      |       |
| 60954740       | 60954760                                                                                                                     | cttgctctctgctcatgatgt  |                |                                                                                                                            |                           | RC          | 8.5      | 0.784                  | -4299    | upstream              |                 |       |          |                      |       |
| 60954776       | 60954796                                                                                                                     | aaacctgactaagcaactgt   |                |                                                                                                                            |                           | FW          | 9.3      | 0.788                  | -4335    | upstream              |                 |       |          |                      |       |
| 60954917       | 60954937                                                                                                                     | CCAACTGAAGCAGCATATGA   | FW             | 10.9                                                                                                                       | 0.851                     | -4476       | upstream |                        |          |                       |                 |       |          |                      |       |
| <i>Pxmp2</i>   | peroxisomal membrane protein 2<br>NM_008993 chr5 110703304 110715187 -<br>chr5 F 5 59.0 cM                                   | NM_008993              | 110718820      | 110718840                                                                                                                  | ACAACCGCTTAGTCAGCGCGG     | RC          | 14.7     | 0.909                  | -3633    | <sup>1</sup> upstream | 1.50            |       |          |                      |       |
|                |                                                                                                                              |                        | 110710346      | 110710366                                                                                                                  | AGGTAGTGACTCAAGTGGACTG    | FW          | 7.5      | 0.787                  | 4841     | exon3                 |                 |       |          |                      |       |
|                |                                                                                                                              |                        | 110713082      | 110713102                                                                                                                  | TAACCTTGCTAAGTAGGTAAA     | RC          | 6.5      | 0.8                    | 2105     | intron1               |                 |       |          |                      |       |
|                |                                                                                                                              |                        | 110715858      | 110715878                                                                                                                  | GTATGGTGCAAAAGGAACCTG     | FW          | 8.5      | 0.784                  | -671     | upstream              |                 |       |          |                      |       |

| Gene symbol    | Gene title/Transcript Info/Chromosomal location/ChIP-seq                                                                                                                                                                     | RefSeq Transcript ID      | ARE_start(mm9) | ARE_end(mm9)                                                                                                                                           | ARE_seq                | Orientation | PWM       | MS                  | Dist_TSS | Location | FI (SFN vs PBS) |       |
|----------------|------------------------------------------------------------------------------------------------------------------------------------------------------------------------------------------------------------------------------|---------------------------|----------------|--------------------------------------------------------------------------------------------------------------------------------------------------------|------------------------|-------------|-----------|---------------------|----------|----------|-----------------|-------|
|                | 1-Ch12 Mafk chr5:110718654-110719040                                                                                                                                                                                         |                           | 110718404      | 110718424                                                                                                                                              | GACACTGCTTGCTCATCTTT   | RC          | 10.2      | 0.827               | -3217    | upstream |                 |       |
|                |                                                                                                                                                                                                                              |                           | 110718476      | 110718496                                                                                                                                              | GATGAGTATAGAGCAGAGGA   | FW          | 6.5       | 0.806               | -3289    | upstream |                 |       |
|                |                                                                                                                                                                                                                              |                           | 110719707      | 110719727                                                                                                                                              | ACGTGTTACTTAGCAGCTct   | FW          | 9.5       | 0.819               | -4520    | upstream |                 |       |
| <b>Qsox1</b>   | quiescin Q6 sulfhydryl oxidase 1<br>NM_001024945 chr1 15765284 157660029 - chr1 G3 1<br>1-Ese14 Mafk chr1:157659760-157659981                                                                                                | NM_001024945<br>NM_023268 | 157659782      | 157659802                                                                                                                                              | CATCCAGCAGCGTCAAGCGGT  | RC          | 7.1       | 0.825               | 247      | exon1    | 1.56            |       |
|                |                                                                                                                                                                                                                              |                           | 157655399      | 157655419                                                                                                                                              | GGAGAATGACTCAGAGCAACA  | FW          | 9.8       | 0.805               | 4630     | intron1  |                 |       |
|                |                                                                                                                                                                                                                              |                           | 157655849      | 157655869                                                                                                                                              | TCCAGCGCTGAGTCAAGAGGA  | RC          | 8.2       | 0.793               | 4180     | intron1  |                 |       |
|                |                                                                                                                                                                                                                              |                           | 157656042      | 157656062                                                                                                                                              | CACAGTCCCAAGTCACTCA    | RC          | 8         | 0.784               | 3987     | intron1  |                 |       |
|                |                                                                                                                                                                                                                              |                           | 157656232      | 157656252                                                                                                                                              | cagcactgatacggcagctca  | FW          | 6.9       | 0.785               | 3797     | intron1  |                 |       |
|                |                                                                                                                                                                                                                              |                           | 157657061      | 157657081                                                                                                                                              | GCTTTGTGACTCAGTAAATAT  | FW          | 11.5      | 0.833               | 2968     | intron1  |                 |       |
|                |                                                                                                                                                                                                                              |                           | 157657519      | 157657539                                                                                                                                              | CTGCTCGTGTTCAGGCCAA    | RC          | 6.7       | 0.796               | 2510     | intron1  |                 |       |
|                |                                                                                                                                                                                                                              |                           | 157657769      | 157657789                                                                                                                                              | AAACAGGCTGTGTCAGTGCT   | RC          | 11.9      | 0.88                | 2260     | intron1  |                 |       |
|                |                                                                                                                                                                                                                              |                           | 157657832      | 157657852                                                                                                                                              | AGCATGTGACTCAGCTGGAAG  | FW          | 7         | 0.824               | 2197     | intron1  |                 |       |
|                |                                                                                                                                                                                                                              |                           | 157662218      | 157662238                                                                                                                                              | ATAGTTGCTGGTCAAGTCC    | RC          | 9.9       | 0.872               | -2189    | upstream |                 |       |
| <b>Ryr2</b>    | ryanodine receptor 2, cardiac<br>NM_023868 chr13 11645369 12199212 - chr13 A1-A2 13 7.0 cM                                                                                                                                   | NM_023868                 | 12200005       | 12200025                                                                                                                                               | CTCCCGTGAAGAGCAAGTT    | FW          | 9.9       | 0.826               | -793     | upstream | 5.16            |       |
|                |                                                                                                                                                                                                                              |                           | 12200283       | 12200303                                                                                                                                               | TAACATGACTAAGAATAAA    | FW          | 13.2      | 0.832               | -1071    | upstream |                 |       |
|                |                                                                                                                                                                                                                              |                           | 12201718       | 12201738                                                                                                                                               | aatattgctatgagatccatg  | RC          | 9.9       | 0.794               | -2506    | upstream |                 |       |
|                |                                                                                                                                                                                                                              |                           | 12201794       | 12201814                                                                                                                                               | caactatgcaAGTCAATGTA   | RC          | 7.1       | 0.853               | -2582    | upstream |                 |       |
|                |                                                                                                                                                                                                                              |                           | 12202748       | 12202768                                                                                                                                               | acagctctgagtaagcagag   | RC          | 11.5      | 0.841               | -3536    | upstream |                 |       |
|                |                                                                                                                                                                                                                              |                           | 12202780       | 12202800                                                                                                                                               | ttgccatgaccaagctcttga  | FW          | 10.2      | 0.861               | -3568    | upstream |                 |       |
|                |                                                                                                                                                                                                                              |                           | 74484180       | 74484200                                                                                                                                               | gccagatgactcagtgaggca  | FW          | 6.9       | 0.789               | 3508     | intron1  |                 |       |
|                |                                                                                                                                                                                                                              |                           | 74485502       | 74485522                                                                                                                                               | GAGGAATCACTGAGCACCAGC  | FW          | 7.7       | 0.807               | 2186     | intron1  |                 |       |
| <b>Sdha</b>    | succinate dehydrogenase complex, subunit A, flavoprotein (Fp)<br>NM_023281 chr13 74459702 74487688 - chr13 C1 13                                                                                                             | NM_023281                 | 74485706       | 74485726                                                                                                                                               | tcaacttgacacggctggagt  | FW          | 9.5       | 0.845               | 1982     | intron1  | 1.31            |       |
|                |                                                                                                                                                                                                                              |                           | 74485870       | 74485890                                                                                                                                               | gcaggctgagaaagccagtg   | FW          | 8.7       | 0.802               | 1818     | intron1  |                 |       |
|                |                                                                                                                                                                                                                              |                           | 74486031       | 74486051                                                                                                                                               | cttgctcttggctcaatgat   | RC          | 8.5       | 0.784               | 1657     | intron1  |                 |       |
|                |                                                                                                                                                                                                                              |                           | 74486066       | 74486086                                                                                                                                               | aaacctgactaagacaCCAG   | FW          | 7.8       | 0.78                | 1622     | intron1  |                 |       |
|                |                                                                                                                                                                                                                              |                           | 74487166       | 74487186                                                                                                                                               | TGCAACCTGAGTCACTGTGT   | RC          | 11.5      | 0.823               | 522      | intron1  |                 |       |
|                |                                                                                                                                                                                                                              |                           | 74488758       | 74488778                                                                                                                                               | laticggtgacttagagataaa | FW          | 9.4       | 0.785               | -1070    | upstream |                 |       |
|                |                                                                                                                                                                                                                              |                           | 74491359       | 74491379                                                                                                                                               | acatcatgaccaagaagcaag  | FW          | 8.5       | 0.784               | -3671    | upstream |                 |       |
|                |                                                                                                                                                                                                                              |                           | 74491925       | 74491945                                                                                                                                               | AGTGAGTGAAGTCAAGCTTGAG | FW          | 8.2       | 0.831               | -4237    | upstream |                 |       |
|                |                                                                                                                                                                                                                              |                           | 140520759      | 140520779                                                                                                                                              | ccctgctgaccagcatgggg   | FW          | 10.2      | 0.891               | 3574     | intron1  |                 |       |
|                |                                                                                                                                                                                                                              |                           | 140512526      | 140512546                                                                                                                                              | caagttgcttagtatacaatg  | RC          | 8.5       | 0.813               | -4659    | upstream |                 |       |
|                |                                                                                                                                                                                                                              |                           | 140512837      | 140512857                                                                                                                                              | CTGGTCTGACACAGCAGGCC   | FW          | 7.2       | 0.857               | -4348    | upstream |                 |       |
|                |                                                                                                                                                                                                                              |                           | <b>Sdhb</b>    | succinate dehydrogenase complex, subunit B, iron sulfur (lp)<br>NM_023374 chr4 140517185 140535107 + chr4 4 E1<br>1-Ch12 Mafk chr4:140520561-140521124 | NM_023374              | 140513523   | 140513543 | GAAAGCTGACCAGCCAGTG | FW       | 9.1      |                 | 0.868 |
| 140514562      | 140514582                                                                                                                                                                                                                    | ATACACTGAGTCAAGTGGAGG     |                |                                                                                                                                                        |                        | FW          | 8.4       | 0.836               | -2623    | upstream |                 |       |
| 140516119      | 140516139                                                                                                                                                                                                                    | GGACCAGCAAAAGTCACTGGGT    |                |                                                                                                                                                        |                        | RC          | 8.6       | 0.849               | -1066    | upstream |                 |       |
| 140516410      | 140516430                                                                                                                                                                                                                    | CTCAGGTGACTAAGGAAACTG     |                |                                                                                                                                                        |                        | FW          | 8.3       | 0.799               | -775     | upstream |                 |       |
| 140517932      | 140517952                                                                                                                                                                                                                    | AAGCGTGTATTTCAGGGGTG      |                |                                                                                                                                                        |                        | RC          | 10.6      | 0.847               | 747      | intron1  |                 |       |
| 140518027      | 140518047                                                                                                                                                                                                                    | GTAGTAGCTCTGTATAGTTC      |                |                                                                                                                                                        |                        | RC          | 8.1       | 0.852               | 842      | intron1  |                 |       |
| 140518600      | 140518620                                                                                                                                                                                                                    | aaaggctgatgacagcaagatc    |                |                                                                                                                                                        |                        | FW          | 9.4       | 0.834               | 1415     | intron1  |                 |       |
| 140519134      | 140519154                                                                                                                                                                                                                    | CGTTGCTGAGGCAGCAGTGA      |                |                                                                                                                                                        |                        | FW          | 7.3       | 0.817               | 1949     | intron1  |                 |       |
| 140519995      | 140520015                                                                                                                                                                                                                    | TTGGTGGCTGTGTCATCTGT      |                |                                                                                                                                                        |                        | RC          | 9.6       | 0.869               | 2810     | intron1  |                 |       |
| 173075826      | 173075846                                                                                                                                                                                                                    | TCTACTGCCTTTTCATGAGAA     |                |                                                                                                                                                        |                        | RC          | 6.5       | 0.772               | 4908     | intron2  |                 |       |
| 173078535      | 173078555                                                                                                                                                                                                                    | GCCCAGTCACTCAGTACCCA      |                |                                                                                                                                                        |                        | FW          | 7.5       | 0.809               | 2199     | intron1  |                 |       |
| <b>Sdhc</b>    | succinate dehydrogenase complex, subunit C, integral membrane protein<br>NM_025321 chr1 173059287 173080734 - chr1 H3 1                                                                                                      | NM_025321                 |                |                                                                                                                                                        |                        |             |           |                     |          |          |                 |       |
|                |                                                                                                                                                                                                                              |                           |                |                                                                                                                                                        |                        |             |           |                     |          |          |                 |       |
|                |                                                                                                                                                                                                                              |                           |                |                                                                                                                                                        |                        |             |           |                     |          |          |                 |       |
|                |                                                                                                                                                                                                                              |                           |                |                                                                                                                                                        |                        |             |           |                     |          |          |                 |       |
|                |                                                                                                                                                                                                                              |                           |                |                                                                                                                                                        |                        |             |           |                     |          |          |                 |       |
|                |                                                                                                                                                                                                                              |                           |                |                                                                                                                                                        |                        |             |           |                     |          |          |                 |       |
|                |                                                                                                                                                                                                                              |                           |                |                                                                                                                                                        |                        |             |           |                     |          |          |                 |       |
| <b>Sdhd</b>    | succinate dehydrogenase complex, subunit D, integral membrane protein<br>NM_025848 chr9 50404444 50411954 - chr9 9 B                                                                                                         | NM_025848                 | 50408619       | 50408639                                                                                                                                               | aACTCCTGACAAAGCTGAGGC  | FW          | 7.7       | 0.843               | 3335     | intron2  | 1.34            |       |
|                |                                                                                                                                                                                                                              |                           | 50410590       | 50410610                                                                                                                                               | TCCTACTGACACAGTCTCTTA  | FW          | 11.1      | 0.878               | 1364     | intron1  |                 |       |
|                |                                                                                                                                                                                                                              |                           | 50412911       | 50412931                                                                                                                                               | TACTGGTGAACAAGTAAAGAA  | FW          | 8.1       | 0.774               | -957     | upstream |                 |       |
|                |                                                                                                                                                                                                                              |                           | 50413236       | 50413256                                                                                                                                               | GACTTGTACCAAGCAGATTG   | FW          | 7.3       | 0.78                | -1282    | upstream |                 |       |
|                |                                                                                                                                                                                                                              |                           | 50413327       | 50413347                                                                                                                                               | AAAAGATTAACAGAGCAAATGT | FW          | 8.8       | 0.797               | -1373    | upstream |                 |       |
|                |                                                                                                                                                                                                                              |                           | 50415529       | 50415549                                                                                                                                               | TCTCCACTTAGTCACTCTCC   | RC          | 8.4       | 0.783               | -3575    | upstream |                 |       |
|                |                                                                                                                                                                                                                              |                           | 50416660       | 50416680                                                                                                                                               | aatccctgacctggcagcgtt  | FW          | 7.3       | 0.828               | -4706    | upstream |                 |       |
| <b>Sds1</b>    | serine dehydratase-like<br>NM_133902 chr5 120908210 120922772 - chr5 F 5<br>1-Ch12 Mafk chr5:120927470-120929055 Mel Mafk chr5:120927480-120928441<br>2-Ch12 Mafk chr5:120927470-120929055 Mel Mafk chr5:120927480-120928441 | NM_133902                 | 120927563      | 120927583                                                                                                                                              | CCAAAGGCTCTCTCACTGCCA  | RC          | 7.2       | 0.789               | -4791    | upstream | 1.34            |       |
|                |                                                                                                                                                                                                                              |                           | 120927668      | 120927688                                                                                                                                              | GTGGCAGCTGTGTGATGGGGT  | RC          | 7.2       | 0.782               | -4896    | upstream |                 |       |
|                |                                                                                                                                                                                                                              |                           | 120918708      | 120918728                                                                                                                                              | cccattgtgacagggccagatg | FW          | 6.6       | 0.813               | 4064     | intron1  |                 |       |
|                |                                                                                                                                                                                                                              |                           | 120919358      | 120919378                                                                                                                                              | tgaagatgacactgaacattt  | FW          | 10.2      | 0.769               | 3414     | intron1  |                 |       |
|                |                                                                                                                                                                                                                              |                           | 120921215      | 120921235                                                                                                                                              | CAGAAATGAACAGCAGACTA   | FW          | 10        | 0.835               | 1557     | intron1  |                 |       |
|                |                                                                                                                                                                                                                              |                           | 120923969      | 120923989                                                                                                                                              | AAACATGCTTTGTAaaccaaga | RC          | 8.5       | 0.792               | -1197    | upstream |                 |       |
|                |                                                                                                                                                                                                                              |                           |                |                                                                                                                                                        |                        |             |           |                     |          |          |                 |       |
| <b>Slc16a1</b> | solute carrier family 16 (monocarboxylic acid transporters), member 1<br>NM_009196 chr3 104442586 104462385 + chr3 F2.2 3<br>1-Ch12 Mafk chr3:104442253-104442611 Ch12 Nrf2 chr3:104442072-104442665                         | NM_009196                 | 104442374      | 104442394                                                                                                                                              | CGCGGCGCGGGTCACTGGCC   | RC          | 6.5       | 0.825               | -212     | upstream | 1.33            |       |
|                |                                                                                                                                                                                                                              |                           | 104437783      | 104437803                                                                                                                                              | taactttcttagtcaactgaac | RC          | 7.3       | 0.799               | -4803    | upstream |                 |       |
|                |                                                                                                                                                                                                                              |                           | 104437871      | 104437891                                                                                                                                              | ggctctgcccgtgaaccaata  | RC          | 7.2       | 0.762               | -4715    | upstream |                 |       |
|                |                                                                                                                                                                                                                              |                           | 104441193      | 104441213                                                                                                                                              | tgggtgtgagtgagcaccatgc | FW          | 6.5       | 0.804               | -1393    | upstream |                 |       |
|                |                                                                                                                                                                                                                              |                           | 104441811      | 104441831                                                                                                                                              | CAGTGTCTTACTAGCATGCAA  | FW          | 6.9       | 0.799               | -775     | upstream |                 |       |
|                |                                                                                                                                                                                                                              |                           | 104442703      | 104442723                                                                                                                                              | CGCCCGCCGCGTCAAGCATA   | RC          | 6.4       | 0.82                | 117      | UTR5     |                 |       |
|                |                                                                                                                                                                                                                              |                           | 104445662      | 104445682                                                                                                                                              | GTCACTCTGTGTATCGCTA    | RC          | 12.2      | 0.809               | 3076     | intron1  |                 |       |
|                |                                                                                                                                                                                                                              |                           | 104446900      | 104446920                                                                                                                                              | AGATTGTCTAagtcaccatac  | RC          | 6.7       | 0.777               | 4314     | intron1  |                 |       |
|                |                                                                                                                                                                                                                              |                           | 104446974      | 104446994                                                                                                                                              | gtattctgactaagctacagc  | FW          | 8.3       | 0.878               | 4388     | intron1  |                 |       |
|                |                                                                                                                                                                                                                              |                           | 104447359      | 104447379                                                                                                                                              | ACAGAAATGAGCTAGTCACTT  | FW          | 7.4       | 0.795               | 4773     | intron1  |                 |       |

| Gene symbol     | Gene title/Transcript Info/Chromosomal location/ChIP-seq                                                                                           | RefSeq Transcript ID   | ARE_start(mm9) | ARE_end(mm9) | ARE_seq                  | Orientation | PWM     | MS    | Dist_TSS | Location | FI (SFN vs PBS) |  |
|-----------------|----------------------------------------------------------------------------------------------------------------------------------------------------|------------------------|----------------|--------------|--------------------------|-------------|---------|-------|----------|----------|-----------------|--|
| <i>Slc25a18</i> | solute carrier family 25 (mitochondrial carrier), member 18<br>NM_001081048 chr6 120723785 120744000 + chr6 F1 6 54.0 cM                           | NM_001081048           | 120718918      | 120718938    | TCACGTGTGACCTTGCTAGTAT   | FW          | 9.5     | 0.833 | -4867    | upstream | 1.44            |  |
|                 |                                                                                                                                                    |                        | 120720071      | 120720091    | CTTAATCCAGAGTCAAGATCA    | RC          | 9.2     | 0.787 | -3714    | upstream |                 |  |
|                 |                                                                                                                                                    |                        | 120720429      | 120720449    | aagctctgcttggctcaggcccaa | RC          | 11      | 0.879 | -3356    | upstream |                 |  |
|                 |                                                                                                                                                    |                        | 120720667      | 120720687    | CTAAGATCTGTGTCAGCTCTTG   | RC          | 8.1     | 0.769 | -3118    | upstream |                 |  |
|                 |                                                                                                                                                    |                        | 120721041      | 120721061    | TTCCCTGTCTGTTTCACTGAGA   | RC          | 11.3    | 0.85  | -2744    | upstream |                 |  |
|                 |                                                                                                                                                    |                        | 120722012      | 120722032    | AAATACGGTGTGTCACTTTAT    | RC          | 12.5    | 0.894 | -1773    | upstream |                 |  |
|                 |                                                                                                                                                    |                        | 120724617      | 120724637    | TATGTTGCTGACTAAATGGTA    | RC          | 8.3     | 0.767 | 832      | intron1  |                 |  |
|                 |                                                                                                                                                    |                        | 120724699      | 120724719    | CCACCCTGACTTAGGCCACCT    | FW          | 9.4     | 0.792 | 914      | intron1  |                 |  |
|                 |                                                                                                                                                    |                        | 120725003      | 120725023    | TGTGTACCTGTGTCACTTAGGG   | RC          | 6.4     | 0.762 | 1218     | intron1  |                 |  |
|                 |                                                                                                                                                    |                        | 120725790      | 120725810    | TAAACTGCCAATTCAGTTCCT    | RC          | 6.9     | 0.792 | 2005     | intron1  |                 |  |
|                 |                                                                                                                                                    |                        | 120726308      | 120726328    | CCCCCATTACCCTGCAGCTGTG   | FW          | 10      | 0.779 | 2523     | intron1  |                 |  |
|                 |                                                                                                                                                    |                        | 120726883      | 120726903    | CACccctgactctgcttcttta   | FW          | 10.3    | 0.861 | 3098     | intron1  |                 |  |
|                 |                                                                                                                                                    |                        | 120727121      | 120727141    | TATGGGTTACTGAGCAGTCTT    | FW          | 11.1    | 0.825 | 3336     | intron1  |                 |  |
|                 |                                                                                                                                                    |                        | 120727416      | 120727436    | aggtcagcttggctcatagcaa   | RC          | 6.9     | 0.845 | 3631     | intron1  |                 |  |
|                 |                                                                                                                                                    |                        | 120728722      | 120728742    | CAAAACCTCAAGCAGTTAT      | FW          | 10.5    | 0.825 | 4937     | intron1  |                 |  |
| <i>Slc27a1</i>  | solute carrier family 27 (fatty acid transporter), member 1<br>NM_011977 chr8 74092825 74110607 + chr8 B3.3 8<br>1-Mel Mafk chr8:74097381-74097403 | NM_011977              | 74097386       | 74097406     | CTCAGTTCGACTCACTCCTGT    | RC          | 10.5    | 0.777 | 4561     | intron3  | 1.57            |  |
|                 |                                                                                                                                                    |                        | 74087928       | 74087948     | ggatgatgagctgagcaccctcc  | FW          | 6.5     | 0.801 | -4897    | upstream |                 |  |
|                 |                                                                                                                                                    |                        | 74088167       | 74088187     | ttgacttccagctccacatctc   | RC          | 6.7     | 0.772 | -4658    | upstream |                 |  |
|                 |                                                                                                                                                    |                        | 74088920       | 74088940     | tggaggggcgaTGCTACTGAGA   | RC          | 6.9     | 0.819 | -3905    | upstream |                 |  |
|                 |                                                                                                                                                    |                        | 74091650       | 74091670     | GAGCAGTACTGTGCTAGCTT     | FW          | 7       | 0.831 | -1175    | upstream |                 |  |
|                 |                                                                                                                                                    |                        |                |              |                          |             |         |       |          |          |                 |  |
| <i>Slc27a2</i>  | solute carrier family 27 (fatty acid transporter), member 2<br>NM_011978 chr2 126378759 126413979 + chr2 F1 2                                      | NM_011978              | 126374054      | 126374074    | AAGAGGTGACCCCTGCAGAAC    | FW          | 9.4     | 0.854 | -4705    | upstream | 3.50            |  |
|                 |                                                                                                                                                    |                        | 126374290      | 126374310    | TTCCCTGTACTAGCAGGCTT     | FW          | 11.3    | 0.844 | -4469    | upstream |                 |  |
|                 |                                                                                                                                                    |                        | 126376713      | 126376733    | CCGAGTGCAGAAAGTTAACTGA   | RC          | 7.4     | 0.782 | -2046    | upstream |                 |  |
|                 |                                                                                                                                                    |                        | 126376762      | 126376782    | CTGTGTGACTGAGCTTCTGT     | FW          | 8.4     | 0.877 | -1997    | upstream |                 |  |
|                 |                                                                                                                                                    |                        | 126377258      | 126377278    | CAGTCTTGACACAGGAAAGGG    | FW          | 8.1     | 0.785 | -1501    | upstream |                 |  |
|                 |                                                                                                                                                    |                        | 126377833      | 126377853    | TGGACATGACAAAGAAATCACC   | FW          | 6.7     | 0.769 | -926     | upstream |                 |  |
|                 |                                                                                                                                                    |                        | 126377869      | 126377889    | CCTCAGTGAACAAGCATGAAA    | FW          | 7.9     | 0.817 | -890     | upstream |                 |  |
|                 |                                                                                                                                                    |                        | 126378475      | 126378495    | GGTACTTGATTAAGCAAAGGC    | FW          | 6.6     | 0.828 | -284     | upstream |                 |  |
|                 |                                                                                                                                                    |                        | 126380768      | 126380788    | TTTAAATGACTAAGGAGTTTG    | FW          | 9.1     | 0.803 | 2009     | intron1  |                 |  |
|                 |                                                                                                                                                    |                        | 126381337      | 126381357    | AGCTCCTGAGAGAGCAAAACA    | FW          | 6.5     | 0.802 | 2578     | intron1  |                 |  |
|                 |                                                                                                                                                    |                        | 126381565      | 126381585    | CTGACTGACTCAGGATTGTA     | FW          | 11.5    | 0.83  | 2806     | intron1  |                 |  |
|                 |                                                                                                                                                    |                        | 126382124      | 126382144    | aactaggctatgctcaagaat    | RC          | 6.8     | 0.843 | 3365     | intron1  |                 |  |
|                 |                                                                                                                                                    |                        | 126383442      | 126383462    | cctcaactcaactgcaqgtttt   | FW          | 9.3     | 0.776 | 4683     | intron1  |                 |  |
| 126383728       | 126383748                                                                                                                                          | atgctgctctgctcaactatgg | RC             | 9.4          | 0.783                    | 4969        | intron1 |       |          |          |                 |  |
| <i>Slc2a4</i>   | solute carrier family 2 (facilitated glucose transporter), member 4<br>NM_009204 chr11 69755787 69761692 - chr11 C-E1 11 40.0 cM                   | NM_009204              | 69756863       | 69756883     | TTTGCCCTCAGTCACTTCTCA    | RC          | 8.4     | 0.782 | 4829     | UTR3     | 2.18            |  |
|                 |                                                                                                                                                    |                        | 69759251       | 69759271     | GAAAAGTACTTTGCTCTTCC     | FW          | 8.8     | 0.85  | 2441     | intron5  |                 |  |
|                 |                                                                                                                                                    |                        | 69763958       | 69763978     | GAGAATGCCTATTCATCCTCC    | RC          | 9.5     | 0.817 | -2266    | upstream |                 |  |
|                 |                                                                                                                                                    |                        | 69765551       | 69765571     | CTATTTGCTGAGTTAATGAAT    | RC          | 7.9     | 0.824 | -3859    | upstream |                 |  |
|                 |                                                                                                                                                    |                        |                |              |                          |             |         |       |          |          |                 |  |
| <i>Slc47a1</i>  | solute carrier family 47, member 1<br>NM_026183 chr11 61156901 61191577 - chr11 B2 11                                                              | NM_026183              | 61188650       | 61188670     | GCACAATAACACAGCTGACCA    | FW          | 8.1     | 0.794 | 2927     | intron1  | 4.02            |  |
|                 |                                                                                                                                                    |                        | 61190846       | 61190866     | GAAGTGGCTTCTCACCCCTTG    | RC          | 10      | 0.808 | 731      | intron1  |                 |  |
|                 |                                                                                                                                                    |                        | 61190881       | 61190901     | CCAACTGACAGAGAACAGAA     | FW          | 6.5     | 0.774 | 696      | intron1  |                 |  |
|                 |                                                                                                                                                    |                        | 61191097       | 61191117     | AGGAGCTGACACAGGATGCTT    | FW          | 7.2     | 0.779 | 480      | intron1  |                 |  |
|                 |                                                                                                                                                    |                        | 61191329       | 61191349     | AACCCGCCCAAGTCAGACCCCT   | RC          | 7.2     | 0.829 | 248      | intron1  |                 |  |
|                 |                                                                                                                                                    |                        | 61192971       | 61192991     | AGACTgctcttagctagtgctt   | RC          | 7.9     | 0.78  | -1394    | upstream |                 |  |
|                 |                                                                                                                                                    |                        | 61193264       | 61193284     | ccctgatgactaagcattcca    | FW          | 13.3    | 0.925 | -1687    | upstream |                 |  |
|                 |                                                                                                                                                    |                        | 61194872       | 61194892     | CTGAGTTCCTGGTCAACAGGC    | RC          | 6.5     | 0.769 | -3295    | upstream |                 |  |
|                 |                                                                                                                                                    |                        | 61196394       | 61196414     | aaaccctgactaagatggttg    | FW          | 8.4     | 0.784 | -4817    | upstream |                 |  |
|                 |                                                                                                                                                    |                        |                |              |                          |             |         |       |          |          |                 |  |
|                 |                                                                                                                                                    |                        |                |              |                          |             |         |       |          |          |                 |  |
| <i>Slc4a3</i>   | solute carrier family 4 (anion exchanger), member 3<br>NM_009208 chr1 75542840 75556006 + chr1 C4 1 41.0 cM                                        | NM_009208              | 75540935       | 75540955     | AAGTTAGCTGGCTCAGGGTGA    | RC          | 11.1    | 0.827 | -1905    | upstream | 1.73            |  |
|                 |                                                                                                                                                    |                        | 75545031       | 75545051     | CAGCCCTCACTGAGCAGAACCC   | FW          | 8.5     | 0.811 | 2191     | intron5  |                 |  |
|                 |                                                                                                                                                    |                        | 75545281       | 75545301     | ACAAGCTGAGCCAGCGAGTGG    | FW          | 7.9     | 0.809 | 2441     | intron5  |                 |  |
|                 |                                                                                                                                                    |                        | 75545722       | 75545742     | TTCACTGACTAAGCCACCCTG    | FW          | 6.8     | 0.863 | 2882     | intron6  |                 |  |
|                 |                                                                                                                                                    |                        | 75546378       | 75546398     | GCCAGGGCTGAGTGAGGCCCTT   | RC          | 8.4     | 0.8   | 3538     | intron6  |                 |  |
|                 |                                                                                                                                                    |                        | 75546628       | 75546648     | TGTGAGTAAC TAGGCACTAG    | FW          | 6.9     | 0.77  | 3788     | intron6  |                 |  |
|                 |                                                                                                                                                    |                        | 75546684       | 75546704     | GGAAGATGACCAAGCAACCCCT   | FW          | 10.4    | 0.885 | 3844     | intron6  |                 |  |
|                 |                                                                                                                                                    |                        | 75546874       | 75546894     | TTGTTGTGACTTGGCCAGTGC    | FW          | 7.2     | 0.834 | 4034     | intron6  |                 |  |
| <i>Sucla2</i>   | succinate-Coenzyme A ligase, ADP-forming, beta subunit<br>NM_011506 chr14 73952592 73995949 + chr14 D3 14                                          | NM_011506              | 73950382       | 73950402     | gtcaaccactgagctcaatccc   | RC          | 7.2     | 0.788 | -2210    | upstream | 1.35            |  |
|                 |                                                                                                                                                    |                        | 73952372       | 73952392     | GAAATGACAGCGTCAAGTTC     | RC          | 8.7     | 0.841 | -220     | upstream |                 |  |
|                 |                                                                                                                                                    |                        | 73956660       | 73956680     | gggcactgagatagcagagatc   | FW          | 8.5     | 0.812 | 4068     | intron1  |                 |  |
|                 |                                                                                                                                                    |                        | 73956974       | 73956994     | CAGACTGCTGTTtaattatgat   | RC          | 10.9    | 0.771 | 4382     | intron1  |                 |  |
|                 |                                                                                                                                                    |                        | 73957108       | 73957128     | tcaacttgacacagctggaat    | FW          | 12      | 0.892 | 4516     | intron1  |                 |  |
|                 |                                                                                                                                                    |                        | 73957431       | 73957451     | cttgcctcttggctcatgatgt   | RC          | 8.5     | 0.784 | 4839     | intron1  |                 |  |
|                 |                                                                                                                                                    |                        | 73957466       | 73957486     | acaccctgactaagcactgg     | FW          | 10.1    | 0.796 | 4874     | intron1  |                 |  |
|                 |                                                                                                                                                    |                        |                |              |                          |             |         |       |          |          |                 |  |
| <i>Sult1d1</i>  | sulfotransferase family 1D, member 1<br>NM_016771 chr5 87983674 87998031 - chr5 E1 5                                                               | NM_016771              | 87993195       | 87993215     | AAATGGCTCTTTCACTTCTT     | RC          | 8.7     | 0.8   | 4836     | intron3  | 4.77            |  |
|                 |                                                                                                                                                    |                        | 87998504       | 87998524     | AAAAATGAGATAGCATTGTG     | FW          | 10.4    | 0.831 | -473     | upstream |                 |  |
|                 |                                                                                                                                                    |                        | 87999858       | 87999878     | ttattgcttactcaatgtctt    | RC          | 9.5     | 0.821 | -1827    | upstream |                 |  |
|                 |                                                                                                                                                    |                        | 88000027       | 88000047     | AAGGCCACTTTGTCATTATGA    | RC          | 8.1     | 0.764 | -1996    | upstream |                 |  |
|                 |                                                                                                                                                    |                        | 88001627       | 88001647     | GTTTGTCTGTGTCACCTGGT     | RC          | 10      | 0.802 | -3596    | upstream |                 |  |
|                 |                                                                                                                                                    |                        | 88002509       | 88002529     | CCGGTTGCTGTTTCAAGTTTG    | RC          | 8.5     | 0.834 | -4478    | upstream |                 |  |
|                 |                                                                                                                                                    |                        | 88002703       | 88002723     | ATAGATCTGTTTCAACCACCTC   | RC          | 10.2    | 0.837 | -4672    | upstream |                 |  |

| Gene symbol  | Gene title/Transcript Info/Chromosomal location/ChIP-seq                                              | RefSeq Transcript ID                                                                                                                                      | ARE_start(mm9) | ARE_end(mm9)                                                                                                                                                                                                             | ARE_seq                      | Orientation | PWM       | MS                     | Dist_TSS | Location   | FI (SFN vs PBS) |       |                      |      |      |
|--------------|-------------------------------------------------------------------------------------------------------|-----------------------------------------------------------------------------------------------------------------------------------------------------------|----------------|--------------------------------------------------------------------------------------------------------------------------------------------------------------------------------------------------------------------------|------------------------------|-------------|-----------|------------------------|----------|------------|-----------------|-------|----------------------|------|------|
| <i>Tecrl</i> | trans-2,3-enoyl-CoA reductase-like<br>NM_153801 chr5 83707146 83784220 - chr5 E1 5                    | NM_153801                                                                                                                                                 | 83781611       | 83781631                                                                                                                                                                                                                 | CCTGGGTGACTTAGACATATAA       | FW          | 8.9       | 0.784                  | 2609     | intron1    | 2.28            |       |                      |      |      |
|              |                                                                                                       |                                                                                                                                                           | 83781856       | 83781876                                                                                                                                                                                                                 | TTTCATGCATCTTCATCGTGA        | RC          | 7.6       | 0.789                  | 2364     | intron1    |                 |       |                      |      |      |
|              |                                                                                                       |                                                                                                                                                           | 83781936       | 83781956                                                                                                                                                                                                                 | aaATAATCACAGAGCAACTCC        | FW          | 6.5       | 0.786                  | 2284     | intron1    |                 |       |                      |      |      |
|              |                                                                                                       |                                                                                                                                                           | 83783024       | 83783044                                                                                                                                                                                                                 | GTAATATTACCTAGCAATCCA        | FW          | 6.5       | 0.788                  | 1196     | intron1    |                 |       |                      |      |      |
|              |                                                                                                       |                                                                                                                                                           | 83784433       | 83784453                                                                                                                                                                                                                 | GAATCATAACCGCTGGCAAAATA      | FW          | 7.5       | 0.768                  | -213     | upstream   |                 |       |                      |      |      |
| <i>Tff2</i>  | trefoil factor 2 (spasmolytic protein 1)<br>NM_009363 chr17 31278006 31281227 - chr17 A3.3 17 17.0 cM | NM_009363                                                                                                                                                 | 31276275       | 31276295                                                                                                                                                                                                                 | CGSTTGGCTAGGTCAAGTGTGG       | RC          | 9.7       | 0.864                  | 4952     | downstream | 5.61            |       |                      |      |      |
|              |                                                                                                       |                                                                                                                                                           | 31279316       | 31279336                                                                                                                                                                                                                 | TCCAAGGCTTTGTCAAGGCTGG       | RC          | 12.3      | 0.879                  | 1911     | intron2    |                 |       |                      |      |      |
|              |                                                                                                       |                                                                                                                                                           | 31279372       | 31279392                                                                                                                                                                                                                 | GGACACTGAATTTGCAAGGCTC       | FW          | 7.3       | 0.803                  | 1855     | intron2    |                 |       |                      |      |      |
|              |                                                                                                       |                                                                                                                                                           | 31281391       | 31281411                                                                                                                                                                                                                 | ACATGGGCTGGGTCAAGGCTGG       | RC          | 14.1      | 0.896                  | -164     | upstream   |                 |       |                      |      |      |
|              |                                                                                                       |                                                                                                                                                           | 31282337       | 31282357                                                                                                                                                                                                                 | gcagactgagtaagccatggg        | FW          | 10.2      | 0.833                  | -1110    | upstream   |                 |       |                      |      |      |
|              |                                                                                                       |                                                                                                                                                           | 31284440       | 31284460                                                                                                                                                                                                                 | gctttacctttagtcagccgca       | RC          | 7.4       | 0.766                  | -3213    | upstream   |                 |       |                      |      |      |
|              |                                                                                                       |                                                                                                                                                           | 31284531       | 31284551                                                                                                                                                                                                                 | TCAGCCTGATGAAGCAAAACT        | FW          | 10.5      | 0.831                  | -3304    | upstream   |                 |       |                      |      |      |
|              |                                                                                                       |                                                                                                                                                           | 31285007       | 31285027                                                                                                                                                                                                                 | agcatggctccatccatggtg        | RC          | 7.6       | 0.803                  | -3780    | upstream   |                 |       |                      |      |      |
|              |                                                                                                       |                                                                                                                                                           | <i>Thrsp</i>   | thyroid hormone responsive SPOT14 homolog (Rattus)<br>NM_009381 chr7 104561442 104566060 - chr7 7 E3                                                                                                                     | NM_009381                    | 104561880   | 104561900 | TAAAGGTGAGCCTGCAACCAA  | FW       | 7.4        |                 | 0.793 | 4180                 | UTR3 | 4.11 |
| 104562264    | 104562284                                                                                             | tttgttgcacttccatagctg                                                                                                                                     |                |                                                                                                                                                                                                                          |                              | RC          | 6.8       | 0.806                  | 3796     | intron1    |                 |       |                      |      |      |
| 104565566    | 104565586                                                                                             | GAACCTGCCCTGTCAATTCCT                                                                                                                                     |                |                                                                                                                                                                                                                          |                              | RC          | 8.1       | 0.836                  | 494      | exon1      |                 |       |                      |      |      |
| 104567140    | 104567160                                                                                             | gtcctatgagagagcaaaaaag                                                                                                                                    |                |                                                                                                                                                                                                                          |                              | FW          | 7.1       | 0.812                  | -1080    | upstream   |                 |       |                      |      |      |
| 104567241    | 104567261                                                                                             | CAGGGCTGACTTGCAGCAGTG                                                                                                                                     |                |                                                                                                                                                                                                                          |                              | FW          | 11        | 0.861                  | -1181    | upstream   |                 |       |                      |      |      |
| 104569335    | 104569355                                                                                             | ATCAGGGCTAAGTCAGACTCA                                                                                                                                     |                |                                                                                                                                                                                                                          |                              | RC          | 12.4      | 0.896                  | -3275    | upstream   |                 |       |                      |      |      |
| 104570170    | 104570190                                                                                             | TGGAGTCTTATGCATACCGA                                                                                                                                      |                |                                                                                                                                                                                                                          |                              | RC          | 10.5      | 0.816                  | -4110    | upstream   |                 |       |                      |      |      |
| 104570437    | 104570457                                                                                             | ACACTGTGACTGTGGAGCAGG                                                                                                                                     |                |                                                                                                                                                                                                                          |                              | FW          | 8.5       | 0.779                  | -4377    | upstream   |                 |       |                      |      |      |
| <i>Tnnc1</i> | troponin C, cardiac/slow skeletal<br>NM_009393 chr14 32021497 32024897 + chr14 B 14 10.0 cM           | NM_009393                                                                                                                                                 |                |                                                                                                                                                                                                                          |                              | 32018028    | 32018048  | gcccagtgaggcagaccagct  | FW       | 10.4       | 0.843           | -3469 | upstream             | 4.85 |      |
|              |                                                                                                       |                                                                                                                                                           |                |                                                                                                                                                                                                                          |                              | 32018185    | 32018205  | gCGGTGGCTCAATCAGCTCA   | RC       | 7          | 0.812           | -3312 | upstream             |      |      |
|              |                                                                                                       |                                                                                                                                                           | 32019895       | 32019915                                                                                                                                                                                                                 | CAGGGGGGGGGGTCAAGCTCC        | RC          | 6.5       | 0.824                  | -1602    | upstream   |                 |       |                      |      |      |
|              |                                                                                                       |                                                                                                                                                           | 32020165       | 32020185                                                                                                                                                                                                                 | AACTCTCCGAAGTCACTCTGC        | RC          | 8.9       | 0.778                  | -1332    | upstream   |                 |       |                      |      |      |
|              |                                                                                                       |                                                                                                                                                           | 32020362       | 32020382                                                                                                                                                                                                                 | TTGTGGTGTCTCTGAGTGTCT        | FW          | 8.5       | 0.82                   | -1135    | upstream   |                 |       |                      |      |      |
|              |                                                                                                       |                                                                                                                                                           | 32020700       | 32020720                                                                                                                                                                                                                 | AATGCAGCTGACTCAAACCCG        | RC          | 7.3       | 0.823                  | -797     | upstream   |                 |       |                      |      |      |
|              |                                                                                                       |                                                                                                                                                           | 32022490       | 32022510                                                                                                                                                                                                                 | GGCTCTGAGGCGAGCACCAGT        | FW          | 7.1       | 0.815                  | 993      | intron1    |                 |       |                      |      |      |
|              |                                                                                                       |                                                                                                                                                           | 32025721       | 32025741                                                                                                                                                                                                                 | GAACAGTGACTAGGGAGGGGA        | FW          | 8.3       | 0.773                  | 4224     | downstream |                 |       |                      |      |      |
|              |                                                                                                       |                                                                                                                                                           | 32026042       | 32026062                                                                                                                                                                                                                 | CCAGAGTGACCAGCAAGGCT         | FW          | 14.7      | 0.926                  | 4545     | downstream |                 |       |                      |      |      |
|              |                                                                                                       |                                                                                                                                                           | <i>Tnni3</i>   | troponin I, cardiac 3<br>NM_009406 chr7 4469909 4474045 - chr7 A1 7 9.0 cM                                                                                                                                               | NM_009406                    | 4471398     | 4471418   | tcaacttgacacagctgagat  | FW       | 12         | 0.892           | 2647  | intron6              |      | 6.94 |
| 4471722      | 4471742                                                                                               | tttgcttctgtgcatgatgt                                                                                                                                      |                |                                                                                                                                                                                                                          |                              | RC          | 8.4       | 0.784                  | 2323     | intron6    |                 |       |                      |      |      |
| 4471757      | 4471777                                                                                               | aaacctgactaaagacgCGT                                                                                                                                      |                |                                                                                                                                                                                                                          |                              | FW          | 9.8       | 0.794                  | 2288     | intron6    |                 |       |                      |      |      |
| 4472678      | 4472698                                                                                               | CAATCTGCAGATCAGAGTCT                                                                                                                                      |                |                                                                                                                                                                                                                          |                              | RC          | 7.2       | 0.792                  | 1367     | exon5      |                 |       |                      |      |      |
| 4474550      | 4474570                                                                                               | CAGAGGTGACCTGCGCTTTT                                                                                                                                      |                |                                                                                                                                                                                                                          |                              | FW          | 10.3      | 0.836                  | -505     | upstream   |                 |       |                      |      |      |
| 4475939      | 4475959                                                                                               | agaccctgagcttgcaccag                                                                                                                                      |                |                                                                                                                                                                                                                          |                              | FW          | 8.1       | 0.807                  | -1894    | upstream   |                 |       |                      |      |      |
| 4477059      | 4477079                                                                                               | gagacagctatatacagggtcc                                                                                                                                    |                |                                                                                                                                                                                                                          |                              | RC          | 7.5       | 0.795                  | -3014    | upstream   |                 |       |                      |      |      |
| 4477483      | 4477503                                                                                               | acctttactgagctcatctctc                                                                                                                                    |                |                                                                                                                                                                                                                          |                              | RC          | 10.8      | 0.823                  | -3438    | upstream   |                 |       |                      |      |      |
| 4478106      | 4478126                                                                                               | CGTTGTGCTGCGTGAATCTGC                                                                                                                                     |                |                                                                                                                                                                                                                          |                              | RC          | 7.1       | 0.799                  | -4061    | upstream   |                 |       |                      |      |      |
| <i>Tnnt2</i> | troponin T2, cardiac<br>NM_001130174 chr1 137732910 137748845 + chr1 E4 1 60.0 cM                     | NM_001130174<br>NM_001130175<br>NM_001130176<br>NM_001130177<br>NM_001130178<br>NM_001130179<br>NM_001130180<br>NM_001130181<br>NM_001136083<br>NM_011619 |                |                                                                                                                                                                                                                          |                              | 137727895   | 137727915 | GGCCCTTGATTTGGCATATGT  | FW       | 6.7        | 0.795           | -5015 | upstream             | 4.66 |      |
|              |                                                                                                       |                                                                                                                                                           | 137729252      | 137729272                                                                                                                                                                                                                | CCAATGCAGAGTTACATGTC         | RC          | 7.6       | 0.789                  | -3658    | upstream   |                 |       |                      |      |      |
|              |                                                                                                       |                                                                                                                                                           | 137730188      | 137730208                                                                                                                                                                                                                | CCAGTCTCTCAGTCAATGGCTA       | RC          | 8.8       | 0.781                  | -2722    | upstream   |                 |       |                      |      |      |
|              |                                                                                                       |                                                                                                                                                           | 137735511      | 137735531                                                                                                                                                                                                                | CAAGGGGCATTTGTCAACATTT       | RC          | 6.6       | 0.812                  | -1926    | upstream   |                 |       |                      |      |      |
|              |                                                                                                       |                                                                                                                                                           | 137735861      | 137735881                                                                                                                                                                                                                | GCATCCGCTCAATCATATCTG        | RC          | 6.4       | 0.806                  | -1576    | upstream   |                 |       |                      |      |      |
|              |                                                                                                       |                                                                                                                                                           | 137736097      | 137736117                                                                                                                                                                                                                | GGACTATTACCGAGCTCAAT         | FW          | 8.3       | 0.788                  | -1340    | upstream   |                 |       |                      |      |      |
|              |                                                                                                       |                                                                                                                                                           | 137739213      | 137739233                                                                                                                                                                                                                | ACCTGTCTGAGTCATGTGGC         | RC          | 12.1      | 0.834                  | 1776     | intron1    |                 |       |                      |      |      |
|              |                                                                                                       |                                                                                                                                                           | 137740197      | 137740217                                                                                                                                                                                                                | GAGGAGTGAAGGCTGCCATTT        | FW          | 6.6       | 0.762                  | 2760     | intron1    |                 |       |                      |      |      |
|              |                                                                                                       |                                                                                                                                                           | 137741225      | 137741245                                                                                                                                                                                                                | CGCCAAGCTGAGTCAATGGTCT       | RC          | 13.1      | 0.921                  | 3788     | intron2    |                 |       |                      |      |      |
|              |                                                                                                       |                                                                                                                                                           | 137741973      | 137741993                                                                                                                                                                                                                | AGCATTCTCTGTCAATTTGGG        | RC          | 7.3       | 0.775                  | 4536     | intron2    |                 |       |                      |      |      |
|              |                                                                                                       |                                                                                                                                                           | <i>Tomm5</i>   | translocase of outer mitochondrial membrane 5 homolog (yeast)<br>NM_001099675 chr4 45118081 45120985 - chr4 B1 4<br>1-Ch12 Mafk chr4:45119011-45119604 Ese14 Mafk chr4:45119169-45119672 Mel Mafk chr4:45119196-45119947 | NM_001099675<br>NM_001134646 | 45119389    | 45119409  | tagagatgactcagcagttca  | FW       | 16.3       | 0.948           | 1596  | <sup>1</sup> intron1 |      | 1.36 |
|              |                                                                                                       |                                                                                                                                                           |                |                                                                                                                                                                                                                          |                              | 45116107    | 45116127  | TCTCTGTAACCTAAGCAGGTGG | FW       | 10.9       | 0.834           | 4878  | downstream           |      |      |
|              |                                                                                                       |                                                                                                                                                           |                |                                                                                                                                                                                                                          |                              | 45118759    | 45118779  | CATACTGCACAGTATAATGG   | RC       | 8.5        | 0.779           | 2226  | intron1              |      |      |
| 45121891     | 45121911                                                                                              | ccagggtagacacagaaaaatc                                                                                                                                    |                |                                                                                                                                                                                                                          |                              | FW          | 14.3      | 0.83                   | -906     | upstream   |                 |       |                      |      |      |
| 45124949     | 45124969                                                                                              | ATTGTTCTGTGTGACAGAAATG                                                                                                                                    |                |                                                                                                                                                                                                                          |                              | RC          | 6.9       | 0.777                  | -3964    | upstream   |                 |       |                      |      |      |
| <i>Tpm1</i>  | tropomyosin 1, alpha<br>NM_001164253 chr9 66870399 66891678 - chr9 C 9 40.0 cM                        | NM_001164248<br>NM_001164249<br>NM_001164250<br>NM_001164251<br>NM_001164252<br>NM_001164253<br>NM_001164254<br>NM_001164255<br>NM_001164256<br>NM_024427 |                |                                                                                                                                                                                                                          |                              | 66886659    | 66886679  | GGCAGGACTGAGTCACTAGGG  | RC       | 8.1        | 0.796           | 5019  | intron1              | 1.69 |      |
|              |                                                                                                       |                                                                                                                                                           | 66888813       | 66888833                                                                                                                                                                                                                 | CCAAGTGAATTAGGGCCAAG         | FW          | 8.9       | 0.79                   | 2865     | intron1    |                 |       |                      |      |      |
|              |                                                                                                       |                                                                                                                                                           | 66889543       | 66889563                                                                                                                                                                                                                 | CTCATGGCTTTGTCTACTAAAC       | RC          | 7.8       | 0.85                   | 2135     | intron1    |                 |       |                      |      |      |
|              |                                                                                                       |                                                                                                                                                           | 66891611       | 66891631                                                                                                                                                                                                                 | AGGCCGGCTTTGTAAAGCCCG        | RC          | 7.8       | 0.77                   | 67       | UTR5       |                 |       |                      |      |      |
|              |                                                                                                       |                                                                                                                                                           | 66891953       | 66891973                                                                                                                                                                                                                 | CCTGAAGCTGAGTAAGGCTAG        | RC          | 8.8       | 0.813                  | -275     | upstream   |                 |       |                      |      |      |
|              |                                                                                                       |                                                                                                                                                           | 66892564       | 66892584                                                                                                                                                                                                                 | AACCTGTGACAGAGCTCTCTG        | FW          | 8.2       | 0.854                  | -886     | upstream   |                 |       |                      |      |      |
|              |                                                                                                       |                                                                                                                                                           | 66893314       | 66893334                                                                                                                                                                                                                 | GATAAGCTGAGTCACTACTAC        | RC          | 8.1       | 0.791                  | -1636    | upstream   |                 |       |                      |      |      |
|              |                                                                                                       |                                                                                                                                                           | 66893376       | 66893396                                                                                                                                                                                                                 | CAATCAGCTACATCACAGTTA        | RC          | 7         | 0.795                  | -1698    | upstream   |                 |       |                      |      |      |
|              |                                                                                                       |                                                                                                                                                           | 66894257       | 66894277                                                                                                                                                                                                                 | TGGGGTGAAGTGGGCTATCTC        | FW          | 10.4      | 0.872                  | -2579    | upstream   |                 |       |                      |      |      |
|              |                                                                                                       |                                                                                                                                                           | 66895572       | 66895592                                                                                                                                                                                                                 | GCAGTGTGAGCTGCACTTAC         | FW          | 6.9       | 0.784                  | 1448     | intron2    |                 |       |                      |      |      |
|              |                                                                                                       |                                                                                                                                                           | 66895778       | 66895798                                                                                                                                                                                                                 | GCAGCGTATCCCGCAAGTGT         | FW          | 8.3       | 0.804                  | 1242     | intron1    |                 |       |                      |      |      |
|              |                                                                                                       |                                                                                                                                                           | 66900711       | 66900731                                                                                                                                                                                                                 | acatctgactaaatcttggc         | FW          | 6.4       | 0.779                  | -3691    | upstream   |                 |       |                      |      |      |
|              |                                                                                                       |                                                                                                                                                           | 66901079       | 66901099                                                                                                                                                                                                                 | CAAGTAGCCAAGTAAGTGG          | RC          | 9.9       | 0.776                  | -4059    | upstream   |                 |       |                      |      |      |
|              |                                                                                                       |                                                                                                                                                           | <i>Trf</i>     | transferrin<br>NM_133977                                                                                                                                                                                                 | NM_133977                    | 103128342   | 103128362 | TGGGGATGACCCAGCCTGCAG  | FW       | 9.7        | 0.866           | 4274  | exon4                |      | 1.29 |
|              |                                                                                                       |                                                                                                                                                           |                |                                                                                                                                                                                                                          |                              | 103128953   | 103128973 | GATGCTGACTCAGAGAGTCC   | FW       | 8.5        | 0.81            | 3663  | intron3              |      |      |

| Gene symbol    | Gene title/Transcript Info/Chromosomal location/ChIP-seq                                                                       | RefSeq Transcript ID | ARE_start(mm9) | ARE_end(mm9) | ARE_seq                | Orientation | PWM  | MS    | Dist_TSS | Location             | FI (SFN vs PBS) |
|----------------|--------------------------------------------------------------------------------------------------------------------------------|----------------------|----------------|--------------|------------------------|-------------|------|-------|----------|----------------------|-----------------|
|                | NM_133977 chr9 103111205 103132616 - chr9 F1-F3 9 56.0 cM                                                                      |                      | 103129207      | 103129227    | GGTTGTCGGAGTCAGGCCGG   | RC          | 7.7  | 0.777 | 3409     | exon3                |                 |
|                |                                                                                                                                |                      | 103130523      | 103130543    | CAGTCATGACAGGACAGGG    | FW          | 11.6 | 0.886 | 2093     | intron1              |                 |
|                |                                                                                                                                |                      | 103130819      | 103130839    | GTTTGTCTACAGTCATCATGT  | RC          | 8.1  | 0.781 | 1797     | intron1              |                 |
|                |                                                                                                                                |                      | 103131463      | 103131483    | lccccagcTGGGTCAACCAGT  | RC          | 8.4  | 0.861 | 1153     | intron1              |                 |
|                |                                                                                                                                |                      | 103131575      | 103131595    | ACTTACTGACTCAGCAAGCCC  | FW          | 12.1 | 0.929 | 1041     | intron1              |                 |
|                |                                                                                                                                |                      | 103131772      | 103131792    | CTTGGTCCGGTGTCACTGTGC  | RC          | 9    | 0.773 | 844      | intron1              |                 |
|                |                                                                                                                                |                      | 103132687      | 103132707    | CCAATTGCCCAATCACCCCGC  | RC          | 9.9  | 0.816 | -71      | upstream             |                 |
| <b>Uox</b>     | <b>urate oxidase</b><br>NM_009474 chr3 146260112 146294447 + chr3 H2 3 75.0 cM<br>1-Ch12 Mafk chr3:146261596-146261969         | NM_009474            | 146261740      | 146261760    | GTTTGTGACTAAGGAATCTG   | FW          | 6.7  | 0.788 | 1628     | <sup>1</sup> intron1 | 1.64            |
|                |                                                                                                                                |                      | 146255101      | 146255121    | CAGCTACAGAGTCATTTTAA   | RC          | 7.2  | 0.78  | -5011    | upstream             |                 |
|                |                                                                                                                                |                      | 146255512      | 146255532    | TAACGGCTTTGTTCATCCCTT  | RC          | 11.2 | 0.863 | -4600    | upstream             |                 |
|                |                                                                                                                                |                      | 146255742      | 146255762    | ATGAGTGTGAGTGAAGTTGGC  | RC          | 9.7  | 0.833 | -4370    | upstream             |                 |
|                |                                                                                                                                |                      | 146255919      | 146255939    | GTTTTCTCTGTGCATCATCT   | RC          | 9.2  | 0.777 | -4193    | upstream             |                 |
|                |                                                                                                                                |                      | 146256543      | 146256563    | TAAACCTAACAGAGCAAAAAG  | FW          | 8.4  | 0.791 | -3569    | upstream             |                 |
|                |                                                                                                                                |                      | 146257440      | 146257460    | ACATCATTACAATGCAATGGT  | FW          | 10.5 | 0.775 | -2672    | upstream             |                 |
|                |                                                                                                                                |                      | 146259535      | 146259555    | CCAGTGTGACTCTGGAGCCT   | FW          | 8.1  | 0.768 | -577     | upstream             |                 |
|                |                                                                                                                                |                      | 146260275      | 146260295    | TGTCATGCTTAGTCACTTCAT  | RC          | 10.1 | 0.907 | 163      | intron1              |                 |
|                |                                                                                                                                |                      | 146260952      | 146260972    | GGCAGTGCAGGTTTCATCTTAA | RC          | 6.7  | 0.792 | 840      | intron1              |                 |
|                |                                                                                                                                |                      | 146263779      | 146263799    | CACAGTCTAAGTCAATGTTG   | RC          | 14.4 | 0.932 | 3667     | intron1              |                 |
|                |                                                                                                                                |                      | 146264739      | 146264759    | CAGAAGCCTATGTAAGTGAAGT | RC          | 7.8  | 0.773 | 4627     | intron1              |                 |
|                |                                                                                                                                |                      | 146264777      | 146264797    | CCCCCTCCTCTGTCAGAGTCA  | RC          | 7.4  | 0.776 | 4665     | intron1              |                 |
|                |                                                                                                                                |                      | 146264856      | 146264876    | GGACTGTGACAAAGGGTTAAA  | FW          | 8.3  | 0.766 | 4744     | intron1              |                 |
| <b>Uqcr10</b>  | <b>ubiquinol-cytochrome c reductase, complex III subunit X</b><br>NM_197979 chr11 4601970 4604347 - chr11 A1 11                | NM_197979            | 4599856        | 4599876      | gagagatgactcagtgattaa  | FW          | 9.1  | 0.795 | 4491     | downstream           | 1.44            |
|                |                                                                                                                                |                      | 4606506        | 4606526      | TTAATTACTTAGTCAATTTAA  | RC          | 7.9  | 0.804 | -2159    | upstream             |                 |
|                |                                                                                                                                |                      | 4608057        | 4608077      | caaatgaccttttcaacagggg | RC          | 7.7  | 0.764 | -3710    | upstream             |                 |
| <b>Uqcr11</b>  | <b>ubiquinol-cytochrome c reductase, complex III subunit XI</b><br>NM_025650 chr10 79865741 79869566 - chr10 C1 10             | NM_025650            | 79865282       | 79865302     | cagctcttacttagcatgcaa  | FW          | 7.5  | 0.806 | 4284     | downstream           | 1.50            |
|                |                                                                                                                                |                      | 79865915       | 79865935     | AAAGGGTGAAGTCAAGCA     | FW          | 9    | 0.827 | 3651     | intron2              |                 |
|                |                                                                                                                                |                      | 79865982       | 79866002     | ATGCCAGCAGTGTCACTAC    | RC          | 7.2  | 0.833 | 3584     | intron2              |                 |
|                |                                                                                                                                |                      | 79867062       | 79867082     | TGCTGGTAACTAGCCTTTGA   | FW          | 7.1  | 0.784 | 2504     | intron1              |                 |
|                |                                                                                                                                |                      | 79868172       | 79868192     | GTTGGGGCTGATTCATCAGAA  | RC          | 7.7  | 0.826 | 1394     | intron1              |                 |
|                |                                                                                                                                |                      | 79869162       | 79869182     | AAGACTGCAAAATCAAAAGCCA | RC          | 7.1  | 0.798 | 404      | intron1              |                 |
|                |                                                                                                                                |                      | 79870464       | 79870484     | AGAGTGTGACTACATCAGGGCG | RC          | 6.4  | 0.801 | -898     | upstream             |                 |
|                |                                                                                                                                |                      | 79872692       | 79872712     | TTTTCTGCTTGGTCACTGGGG  | RC          | 13.7 | 0.901 | -3126    | upstream             |                 |
|                |                                                                                                                                |                      | 79873363       | 79873383     | TGTACTGTGGTTCACAGCAC   | RC          | 11.6 | 0.905 | -3797    | upstream             |                 |
|                |                                                                                                                                |                      | 79874267       | 79874287     | AAGGCCCTTAGGTCAAGGTGC  | RC          | 8.2  | 0.764 | -4701    | upstream             |                 |
| <b>Uqcr1</b>   | <b>ubiquinol-cytochrome c reductase core protein 1</b><br>NM_025407 chr9 108838660 108851686 + chr9 F2 9 57.0 cM               | NM_025407            | 108836261      | 108836281    | acagtgtagcttaagttgtag  | FW          | 8.2  | 0.789 | -2399    | upstream             | 1.55            |
|                |                                                                                                                                |                      | 108836580      | 108836600    | cacaagccttagttacactctg | RC          | 7    | 0.785 | -2080    | upstream             |                 |
|                |                                                                                                                                |                      | 108838067      | 108838087    | TTTTTTGCTTAGTATTTTAT   | RC          | 9.1  | 0.822 | -593     | upstream             |                 |
|                |                                                                                                                                |                      | 108842821      | 108842841    | ltgctttgacacagaaattca  | FW          | 6.6  | 0.826 | 4161     | intron2              |                 |
| <b>Uqcrf51</b> | <b>ubiquinol-cytochrome c reductase, Rieske iron-sulfur polypeptide 1</b><br>NM_025710 chr13 30632180 30637185 - chr13 13 A3.3 | NM_025710            | 30633397       | 30633417     | CAAATTGCTGTGGACCATTT   | RC          | 12.8 | 0.832 | 3788     | intron1              | 1.58            |
|                |                                                                                                                                |                      | 30633653       | 30633673     | AAATCGCAAAgtaattatta   | RC          | 11.1 | 0.794 | 3532     | intron1              |                 |
|                |                                                                                                                                |                      | 30635167       | 30635187     | ATCTTTCCATAGTCACCCAGA  | RC          | 9.7  | 0.775 | 2018     | intron1              |                 |
|                |                                                                                                                                |                      | 30636773       | 30636793     | TCACCGTGAGCCCGCTGTCT   | FW          | 6.7  | 0.778 | 412      | intron1              |                 |
|                |                                                                                                                                |                      | 30640051       | 30640071     | TCTACTGCAGAGTATGCTTC   | RC          | 11.6 | 0.814 | -2866    | upstream             |                 |
|                |                                                                                                                                |                      | 30641648       | 30641668     | acctctgctaggtcacatcac  | RC          | 7.7  | 0.867 | -4463    | upstream             |                 |
| <b>Uqcrh</b>   | <b>ubiquinol-cytochrome c reductase hinge protein</b><br>NM_025641 chr4 115739569 115747675 - chr4 4 C7                        | NM_025641            | 115743020      | 115743040    | CAACTTGCAAAGTCAGAAAAA  | RC          | 7.8  | 0.855 | 4655     | intron2              | 1.38            |
|                |                                                                                                                                |                      | 115743732      | 115743752    | gattaagcttgttcaacctgac | RC          | 6.6  | 0.795 | 3943     | intron1              |                 |
|                |                                                                                                                                |                      | 115746246      | 115746266    | GAAAATCCAAAGTCACACTGA  | RC          | 11   | 0.791 | 1429     | intron1              |                 |
|                |                                                                                                                                |                      | 115750264      | 115750284    | AGAACTTGACTCTGTAAGAAC  | FW          | 6.9  | 0.776 | -2589    | upstream             |                 |
|                |                                                                                                                                |                      | 115750315      | 115750335    | AGCGTCTGCTTTCAGAGGGA   | RC          | 9.5  | 0.838 | -2640    | upstream             |                 |
|                |                                                                                                                                |                      | 115750951      | 115750971    | gtgtgtgctgaetcaacctg   | RC          | 11.9 | 0.869 | -3276    | upstream             |                 |
|                |                                                                                                                                |                      | 115751878      | 115751898    | CCTCAGTGAGCAAGCAGCTTA  | FW          | 9.5  | 0.825 | -4203    | upstream             |                 |
| <b>Uqcrq</b>   | <b>ubiquinol-cytochrome c reductase, complex III subunit VII</b><br>NM_025352 chr11 53242449 53244333 - chr11 B1.3 11          | NM_025352            | 53240128       | 53240148     | ACACTGTCCACAGCTCAGAC   | FW          | 8.7  | 0.798 | 4205     | downstream           | 1.50            |
|                |                                                                                                                                |                      | 53240184       | 53240204     | ACACTGTCCACAGCTCAGAC   | FW          | 8.7  | 0.798 | 4149     | downstream           |                 |
|                |                                                                                                                                |                      | 53240244       | 53240264     | ACACTGTTCACAGCTCAGAC   | FW          | 10.1 | 0.804 | 4089     | downstream           |                 |
|                |                                                                                                                                |                      | 53240362       | 53240382     | GAACACTCACACAGCTCAGAG  | FW          | 6.9  | 0.778 | 3971     | downstream           |                 |
|                |                                                                                                                                |                      | 53240451       | 53240471     | ATCAGAGCCGATTCACAAATGC | RC          | 8.3  | 0.808 | 3882     | downstream           |                 |
| <b>Uqcrq</b>   | <b>ubiquinol-cytochrome c reductase, complex III subunit VII</b><br>NM_025352 chr11 53242449 53244333 - chr11 B1.3 11          | NM_025352            | 53242348       | 53242368     | tcgcatgacatagcaggcaag  | FW          | 14.6 | 0.909 | 1985     | downstream           | 1.50            |
|                |                                                                                                                                |                      | 53243209       | 53243229     | ccgaggtgactaagggaagtaa | FW          | 8.9  | 0.784 | 1124     | intron1              |                 |
|                |                                                                                                                                |                      | 53245389       | 53245409     | TTTTATCCTGTGCTAATGATG  | RC          | 9.2  | 0.791 | -1056    | upstream             |                 |
|                |                                                                                                                                |                      | 53246055       | 53246075     | tttaactgccaggtcatccatc | RC          | 8.6  | 0.835 | -1722    | upstream             |                 |
|                |                                                                                                                                |                      | 53247167       | 53247187     | ACTACATGAAAAGCTCTATA   | FW          | 7.5  | 0.795 | -2834    | upstream             |                 |
|                |                                                                                                                                |                      | 53247836       | 53247856     | tctctgctcagtcactctag   | RC          | 12.9 | 0.925 | -3503    | upstream             |                 |
| <b>Usp13</b>   | <b>ubiquitin specific peptidase 13 (isopeptidase T-3)</b><br>NM_001013024 chr3 32716547 32834179 + chr3 A3 3                   | NM_001013024         | 32714214       | 32714234     | ATGCAGTAACTAGCAATAGC   | FW          | 6.7  | 0.781 | -2333    | upstream             | 1.36            |
|                |                                                                                                                                |                      | 32714935       | 32714955     | GGCTGATGACAGTGCAGAGTG  | FW          | 8.1  | 0.834 | -1612    | upstream             |                 |
|                |                                                                                                                                |                      | 32716441       | 32716461     | CCCGCTGACGCTGCAGCTGG   | FW          | 9.9  | 0.857 | -106     | upstream             |                 |
|                |                                                                                                                                |                      | 32717502       | 32717522     | GATTCGTGACCCCGCAGGAGG  | FW          | 7.7  | 0.846 | 955      | intron1              |                 |
|                |                                                                                                                                |                      | 32717658       | 32717678     |                        | FW          | 15.8 | 0.937 | 1111     | intron1              |                 |
|                |                                                                                                                                |                      | 32718670       | 32718690     | cttgettccttagtcatgatgt | RC          | 8.5  | 0.784 | 2123     | intron1              |                 |
|                |                                                                                                                                |                      | 32718705       | 32718725     | aaacctgactaagacaACAC   | FW          | 8.6  | 0.784 | 2158     | intron1              |                 |

| Gene symbol | Gene title/Transcript Info/Chromosomal location/ChIP-seq | RefSeq Transcript ID | ARE_start(mm9) | ARE_end(mm9) | ARE_seq               | Orientation | PWM | MS    | Dist_TSS | Location | FI (SFN vs PBS) |
|-------------|----------------------------------------------------------|----------------------|----------------|--------------|-----------------------|-------------|-----|-------|----------|----------|-----------------|
|             |                                                          |                      | 32720177       | 32720197     | taaatagctggatcacagatc | RC          | 7.9 | 0.806 | 3630     | intron1  |                 |
|             |                                                          |                      | 32720905       | 32720925     | ggagttgctccttcatgctgt | RC          | 8   | 0.824 | 4358     | intron1  |                 |

**Table E4. Pathway analysis of lung transcriptome changes by hyperoxia in *Nrf2*<sup>+/+</sup> mice (n = 7162, *p* < 0.01 Moderate *t*-test).**

**A. Top networks**

|          | <b>Genes (SFN-altered in bold)</b>                                                                                                                                                          | <b>Score</b> | <b>Disease and Functions</b>                                                   |
|----------|---------------------------------------------------------------------------------------------------------------------------------------------------------------------------------------------|--------------|--------------------------------------------------------------------------------|
| <b>1</b> | <i>Actr10, Actr1b, Ankrd1, Anxa8/Anxa8l1, Arhgdib, Ccdc137, Cep76, Chrac1, Cspp1, Ddit4l, Gdap2, Gnb2, Ifitm5, Ipo13, Irx3, Klhl13, Mad2l2, Mdh1, Mpp3, Mterf2, Myl6b, Nhlrc2</i> , etc.    | 31           | DNA Replication, Recombination, and Repair, Cell Cycle, Developmental Disorder |
| <b>2</b> | <i>Aass, Ap4e1, Ap4m1, Ap4s1, Atp11a, Bicap, Clec2d (Includes Others), Eny2, Esr1, Fgd5, Gcsh, Kcnj13, Kenk6, Lypd1, Macrod1, Marc2, Mphosph9, Mta, Ncaph, Rp2, Rtn4rl1, Scube2</i> , etc.  | 29           | Hematological Disease, Metabolic Disease, Hereditary Disorder                  |
| <b>3</b> | <i>Clpp, Cluh, Denr, Dpp8, Farsb, Malsu1, Mapk, Mecr, Mettl1, Mrpl2, Mrpl3, Mrpl9, Mrpl13, Mrpl14, Mrpl16, Mrpl17, Mrpl19, Mrpl20, Mrpl27, Mrpl32, Mrpl37, Mrpl45, Mrps30, Mtif2</i> , etc. | 29           | Cancer, Organismal Injury and Abnormalities, Gastrointestinal Disease          |

**B. Top upstream regulators**

| <b>Regulators</b>         | <b>Molecule Type</b>    | <b>Predicted Activation State</b> | <b><i>p</i></b> |
|---------------------------|-------------------------|-----------------------------------|-----------------|
| <i>Tp53</i>               | transcription regulator | Activated                         | 3.34E-10        |
| <i>Pdgfbb</i>             | complex                 | Activated                         | 3.35E-09        |
| <i>Cd40lg</i>             | cytokine                | -                                 | 5.98E-09        |
| <i>F2</i>                 | peptidase               | Activated                         | 3.90E-08        |
| <i>Hgf</i>                | growth factor           | Activated                         | 5.47E-08        |
| <i>Tnf</i>                | cytokine                | Activated                         | 1.63E-07        |
| <b>Lipopolysaccharide</b> | chemical drug           | Activated                         | 1.72E-07        |
| <b>ERK</b>                | group                   | Activated                         | 2.44E-07        |
| <i>Nfe2l2</i>             | transcription regulator | Activated                         | 3.38E-07        |

**C. Top canonical pathways**

| <b>Pathway</b>                                                                 | <b>-Log(<i>p</i>)</b> | <b>Genes</b>                                                                                                                                                                                              |
|--------------------------------------------------------------------------------|-----------------------|-----------------------------------------------------------------------------------------------------------------------------------------------------------------------------------------------------------|
| NRF2-mediated Oxidative Stress Response                                        | 4.47                  | <i>Sqstm1, Gsto2, Pik3c2a, Mras, Prkcq, Dnajc5, Ube2e3, Enc1, Dnajc21, Actg1, Cct7, Actb, Dnajc15, Gsr, Cat, Aox1, Gpx2</i> , etc.                                                                        |
| tRNA Charging                                                                  | 3.98                  | <i>Cars2, Yars, Sars, Tars12, Yars2, Farsb, Farsa, Wars2, Gars, Eprs, Tars, Mars2, Hars, Cars, Nars2, Rars, Aars2, Vars</i> , etc.                                                                        |
| ILK Signaling                                                                  | 3.55                  | <i>Pik3c2a, Tnfrsf1a, Ppp2r4, Itgb2, Myh9, Rps6ka5, Arhgef6, Actg1, Ppp2r5a, Creb3, Snai2, Actb, Ppp2cb, Actn2, Flnc</i> , etc.                                                                           |
| Crosstalk between Dendritic Cells and Natural Killer Cells                     | 3.57                  | <i>Ccr7, Il15, Itgal, Csf2, Actc1, Il6, Tln2, Trem2, Tlr4, Cd83, Actg1, Actb, Hla-Drb5, Cd80, Fscn1, Ltb, Nfkb1, Faslg, Tln1</i> , etc.                                                                   |
| Actin Nucleation by ARP-WASP Complex                                           | 3.35                  | <i>Rhoh, Itga3, Rhod, Mras, Rhoc, Wipf1, Arpc5l, Rock2, Wasf1, Was, Itgb1, Rnd3, Arpc1a, Rras2, Vasp, Ppp1r12c, Rhoj, Actr3</i> , etc.                                                                    |
| Role of Macrophages, Fibroblasts and Endothelial Cells in Rheumatoid Arthritis | 3.16                  | <i>Csf2, Dkk3, Pik3c2a, Tlr1, Tnfrsf1a, Mras, Prkcq, Smo, Dkk1, Plce1, Il1r2, Nfkbie, Il16, Mapkapk2, Tlr4, Tnfsf13b, Pik3r3, Ccl5, Pik3r4, Traf5, Fzd4, Plcd3, Pdgc, Mmp3, Il18, Prkcd, Calm1</i> , etc. |
| p53 Signaling                                                                  | 2.67                  | <i>Pik3c2a, Ccng1, E2f1, Gadd45b, Pias1, Thbs1, Tp53inp1, Gnl3, Topbp1, Dram1, Pik3ca, Snai2, Tp53bp2, Atr, Pidd1, Gadd45g</i> , etc.                                                                     |
| NF-κB Activation by Viruses                                                    | 2.62                  | <i>Eif2ak2, Traf2, Itgal, Tnfrsf14, Pik3c2a, Itga3, Mras, Itgb2, Nfkbie, Itga1, Pik3ca, Cr2, Itgb1, Prkcb, Nfkb1, Rela, Itga5</i> , etc.                                                                  |



Table E5. Nrf2<sup>-/-</sup> mice: Air vs Hyperoxia

Moderated T-Test (p-value cut-off:0.01)/Fold Change 2

\*Fold change (FC) in red indicates increased and in blue decreased by hyperoxia.

| RefSeq       | Transcript | IE Gene Symbol                | *FC (Air vs O <sub>2</sub> ) | p (Corr)    | Gene Title                                                                                         |
|--------------|------------|-------------------------------|------------------------------|-------------|----------------------------------------------------------------------------------------------------|
| NM_007950    |            | <i>Ereg</i>                   | 104.283                      | 3.40E-05    | epiregulin                                                                                         |
| NM_011315    |            | <i>Saa3</i>                   | 95.127                       | 1.21E-04    | serum amyloid A 3                                                                                  |
| NM_031168    |            | <i>Il6</i>                    | 86.566                       | 1.24E-04    | interleukin 6                                                                                      |
| NM_001044384 | ///N       | <i>Timp1</i>                  | 57.112                       | 3.40E-05    | tissue inhibitor of metalloproteinase 1                                                            |
| NM_011333    |            | <i>Ccl2</i>                   | 44.161                       | 6.57E-05    | chemokine (C-C motif) ligand 2                                                                     |
| NM_011819    |            | <i>Gdf15</i>                  | 43.117                       | 6.30E-05    | growth differentiation factor 15                                                                   |
| NM_009890    |            | <i>Ch25h</i>                  | 23.631                       | 3.89E-04    | cholesterol 25-hydroxylase                                                                         |
| NM_008176    |            | <i>Cxcl1</i>                  | 22.824                       | 4.52E-05    | chemokine (C-X-C motif) ligand 1                                                                   |
| NM_009117    |            | <i>Saa1</i>                   | 22.778                       | 0.002576101 | serum amyloid A 1                                                                                  |
| NM_009627    |            | <i>Adm</i>                    | 22.591                       | 5.78E-05    | adrenomedullin                                                                                     |
| NM_172845    |            | <i>Adams4</i>                 | 22.263                       | 2.94E-04    | a disintegrin-like and metallopeptidase (reprolysin type) with thrombospondin type 1 motif, 4      |
| NM_009252    |            | <i>Serpina3n</i>              | 20.860                       | 5.15E-05    | serine (or cysteine) peptidase inhibitor, clade A, member 3N                                       |
| NM_008726    |            | <i>Nppb</i>                   | 20.599                       | 6.71E-04    | natriuretic peptide type B                                                                         |
| NM_013654    |            | <i>Ccl7</i>                   | 20.081                       | 5.59E-05    | chemokine (C-C motif) ligand 7                                                                     |
| NM_011607    |            | <i>Tnc</i>                    | 19.457                       | 2.80E-04    | tenascin C                                                                                         |
| NM_133731    |            | <i>Prss22</i>                 | 18.406                       | 0.004186718 | protease, serine, 22                                                                               |
| NM_010555    |            | <i>Il1r2</i>                  | 18.044                       | 0.006343347 | interleukin 1 receptor, type II                                                                    |
| NM_010171    |            | <i>F3</i>                     | 17.742                       | 4.79E-05    | coagulation factor III                                                                             |
| NM_007697    |            | <i>Chl1</i>                   | 16.255                       | 2.05E-04    | cell adhesion molecule with homology to L1CAM                                                      |
| NM_008630    |            | <i>Mt2</i>                    | 16.140                       | 4.26E-05    | metallothionein 2                                                                                  |
| NM_008871    |            | <i>Serpine1</i>               | 16.133                       | 5.36E-05    | serine (or cysteine) peptidase inhibitor, clade E, member 1                                        |
| NM_007825    |            | <i>Cyp7b1</i>                 | 15.246                       | 3.40E-05    | cytochrome P450, family 7, subfamily b, polypeptide 1                                              |
| NM_013602    |            | <i>Mt1</i>                    | 13.987                       | 5.78E-05    | metallothionein 1                                                                                  |
| NM_011331    | ///XM_1    | <i>Ccl12</i> ///LOC100862578  | 13.652                       | 2.41E-04    | chemokine (C-C motif) ligand 12///c-c motif chemokine 12-like                                      |
| NM_001177352 | ///N       | <i>Myc</i>                    | 13.504                       | 3.40E-05    | myelocytomatosis oncogene                                                                          |
| NM_010809    |            | <i>Mmp3</i>                   | 13.381                       | 6.52E-05    | matrix metallopeptidase 3                                                                          |
| NM_008638    |            | <i>Mthfd2</i>                 | 12.763                       | 3.40E-05    | methylenetetrahydrofolate dehydrogenase (NAD+ dependent), methylenetetrahydrofolate cyclohydrolase |
| NM_011452    |            | <i>Serpina9b</i>              | 12.344                       | 2.83E-04    | serine (or cysteine) peptidase inhibitor, clade B, member 9b                                       |
| NM_028889    |            | <i>Efh1</i>                   | 11.866                       | 5.78E-05    | EF hand domain containing 1                                                                        |
| NM_001111099 | ///N       | <i>Cdkn1a</i>                 | 11.449                       | 3.40E-05    | cyclin-dependent kinase inhibitor 1A (P21)                                                         |
| NM_134102    |            | <i>Pla1a</i>                  | 11.408                       | 7.68E-05    | phospholipase A1 member A                                                                          |
| NM_009141    |            | <i>Cxcl5</i>                  | 11.223                       | 2.88E-04    | chemokine (C-X-C motif) ligand 5                                                                   |
| NM_008987    |            | <i>Ptx3</i>                   | 11.202                       | 7.66E-04    | pentraxin related gene                                                                             |
| NM_009140    |            | <i>Cxcl2</i>                  | 11.035                       | 0.001773256 | chemokine (C-X-C motif) ligand 2                                                                   |
| NM_008611    |            | <i>Mmp8</i>                   | 10.968                       | 0.002842004 | matrix metallopeptidase 8                                                                          |
| NM_001163525 | ///N       | <i>S100a14</i>                | 10.698                       | 7.96E-05    | S100 calcium binding protein A14                                                                   |
| NM_009404    |            | <i>Tnfrsf9</i>                | 10.580                       | 3.40E-05    | tumor necrosis factor (ligand) superfamily, member 9                                               |
| NM_021342    |            | <i>Kcne4</i>                  | 10.497                       | 6.57E-05    | potassium voltage-gated channel, Isk-related subfamily, gene 4                                     |
| NM_001039562 |            | <i>Ankrd37</i>                | 10.477                       | 0.001198963 | ankyrin repeat domain 37                                                                           |
| NM_011347    |            | <i>Selp</i>                   | 10.403                       | 6.74E-05    | selectin, platelet                                                                                 |
| NM_001161746 | ///N       | <i>Tnfrsf12a</i>              | 9.863                        | 3.40E-05    | tumor necrosis factor receptor superfamily, member 12a                                             |
| NM_008491    |            | <i>Lcn2</i>                   | 9.794                        | 6.36E-04    | lipocalin 2                                                                                        |
| NM_203320    |            | <i>Cxcl3</i>                  | 9.782                        | 0.001372295 | chemokine (C-X-C motif) ligand 3                                                                   |
| NM_001039537 | ///N       | <i>Lif</i>                    | 9.740                        | 7.43E-05    | leukemia inhibitory factor                                                                         |
| NM_008381    |            | <i>Inhbb</i>                  | 9.606                        | 8.83E-05    | inhibin beta-B                                                                                     |
| NM_013468    |            | <i>Ankrd1</i>                 | 9.579                        | 3.07E-04    | ankyrin repeat domain 1 (cardiac muscle)                                                           |
| NM_007695    |            | <i>Chi3l1</i>                 | 9.254                        | 4.05E-04    | chitinase 3-like 1                                                                                 |
| NM_009912    |            | <i>Ccr1</i>                   | 9.141                        | 0.004920226 | chemokine (C-C motif) receptor 1                                                                   |
| NM_011817    |            | <i>Gadd45g</i>                | 8.713                        | 7.38E-05    | growth arrest and DNA-damage-inducible 45 gamma                                                    |
| NM_007390    |            | <i>Chrna7</i>                 | 8.653                        | 7.94E-05    | cholinergic receptor, nicotinic, alpha polypeptide 7                                               |
| NM_001109914 |            | <i>Apol1</i>                  | 8.482                        | 8.88E-04    | apolipoprotein I domain containing 1                                                               |
| NM_017373    |            | <i>Nfil3</i>                  | 8.413                        | 1.13E-04    | nuclear factor, interleukin 3, regulated                                                           |
| NM_022415    |            | <i>Ptges</i>                  | 8.392                        | 0.002804473 | prostaglandin E synthase                                                                           |
| NM_026835    |            | <i>Ms4a6d</i>                 | 8.262                        | 1.52E-04    | membrane-spanning 4-domains, subfamily A, member 6D                                                |
| NM_015798    |            | <i>Fbxo15</i>                 | 8.166                        | 1.01E-04    | F-box protein 15                                                                                   |
| NM_010755    |            | <i>Maff</i>                   | 8.085                        | 3.40E-05    | v-maf musculoaponeurotic fibrosarcoma oncogene family, protein F (avian)                           |
| NM_001081249 | ///N       | <i>Vcan</i>                   | 8.020                        | 1.50E-04    | versican                                                                                           |
| NM_007836    |            | <i>Gadd45a</i>                | 8.017                        | 3.40E-05    | growth arrest and DNA-damage-inducible 45 alpha                                                    |
| NM_001081957 | ///X       | <i>LOC100504934</i> ///Wfcd17 | 7.968                        | 0.001044687 | extracellular peptidase inhibitor-like///WAP four-disulfide core domain 17                         |
| NM_018865    |            | <i>Wisp1</i>                  | 7.961                        | 8.74E-04    | WNT1 inducible signaling pathway protein 1                                                         |
| NM_009899    | ///NM_     | <i>Cla1</i> ///Cla2           | 7.904                        | 7.45E-05    | chloride channel calcium activated 1///chloride channel calcium activated 2                        |
| NM_024495    |            | <i>Car13</i>                  | 7.863                        | 1.68E-04    | carbonic anhydrase 13                                                                              |
| NM_001161432 | ///N       | <i>Eda2r</i>                  | 7.817                        | 2.76E-04    | ectodysplasin A2 receptor                                                                          |
| NM_020581    |            | <i>Angptl4</i>                | 7.791                        | 0.001826737 | angiopoietin-like 4                                                                                |
| NM_007930    |            | <i>Enc1</i>                   | 7.770                        | 3.40E-05    | ectodermal-neural cortex 1                                                                         |
| NM_028216    |            | <i>Pscs</i>                   | 7.750                        | 6.90E-05    | prostate stem cell antigen                                                                         |
| NM_026862    |            | <i>Cd177</i>                  | 7.713                        | 3.40E-05    | CD177 antigen                                                                                      |
| NM_011332    |            | <i>Ccl17</i>                  | 7.659                        | 8.42E-04    | chemokine (C-C motif) ligand 17                                                                    |
| NM_009253    |            | <i>Serpina3m</i>              | 7.576                        | 2.22E-04    | serine (or cysteine) peptidase inhibitor, clade A, member 3M                                       |
| NM_009704    |            | <i>Areg</i>                   | 7.571                        | 1.29E-04    | amphiregulin                                                                                       |
| NM_010118    |            | <i>Egr2</i>                   | 7.546                        | 7.24E-04    | early growth response 2                                                                            |
| NM_009903    |            | <i>Cldn4</i>                  | 7.364                        | 0.006593674 | claudin 4                                                                                          |
| NM_001113326 | ///N       | <i>Msr1</i>                   | 7.244                        | 7.57E-05    | macrophage scavenger receptor 1                                                                    |
| NM_001161714 | ///N       | <i>Tgms1</i>                  | 7.142                        | 1.14E-04    | transglutaminase 1, K polypeptide                                                                  |
| NM_009971    |            | <i>Csf3</i>                   | 7.095                        | 0.004375011 | colony stimulating factor 3 (granulocyte)                                                          |
| NM_020610    |            | <i>Nrip3</i>                  | 6.914                        | 1.97E-04    | nuclear receptor interacting protein 3                                                             |
| NM_007707    |            | <i>Socs3</i>                  | 6.815                        | 6.57E-05    | suppressor of cytokine signaling 3                                                                 |
| NM_001162939 | ///N       | <i>Aen</i>                    | 6.798                        | 6.13E-05    | apoptosis enhancing nuclease                                                                       |
| NM_027399    |            | <i>Steap1</i>                 | 6.742                        | 9.86E-05    | six transmembrane epithelial antigen of the prostate 1                                             |
| NM_011227    |            | <i>Rab20</i>                  | 6.720                        | 2.24E-04    | RAB20, member RAS oncogene family                                                                  |

| RefSeq Transcript ID | Gene Symbol                     | *FC (Air vs O <sub>2</sub> ) | p (Corr)    | Gene Title                                                                         |
|----------------------|---------------------------------|------------------------------|-------------|------------------------------------------------------------------------------------|
| NM_001205339         | <b>LOC100047252//Psat1</b>      | <b>6.698</b>                 | 4.26E-05    | phosphoserine aminotransferase-like//phosphoserine aminotransferase 1              |
| NM_001276455         | <b>Slc19a2</b>                  | <b>6.682</b>                 | 3.40E-05    | solute carrier family 19 (thiamine transporter), member 2                          |
| NM_001172472         | <b>Sphk1</b>                    | <b>6.598</b>                 | 1.75E-04    | sphingosine kinase 1                                                               |
| NM_010902            | <b>Nfe2l2</b>                   | <b>6.586</b>                 | 0.004835362 | nuclear factor, erythroid derived 2, like 2                                        |
| NM_009899            | <b>Clca1//Clca2</b>             | <b>6.540</b>                 | 7.57E-05    | chloride channel calcium activated 1//chloride channel calcium activated 2         |
| NM_026473            | <b>Tubb6</b>                    | <b>6.514</b>                 | 3.40E-05    | tubulin, beta 6 class V                                                            |
| NM_029796            | <b>Lrg1</b>                     | <b>6.484</b>                 | 2.83E-04    | leucine-rich alpha-2-glycoprotein 1                                                |
| NM_010235            | <b>Fosl1</b>                    | <b>6.437</b>                 | 7.45E-05    | fos-like antigen 1                                                                 |
| NM_008147            | <b>Gp49a//Lilrb4</b>            | <b>6.408</b>                 | 0.007934198 | glycoprotein 49 A//leukocyte immunoglobulin-like receptor, subfamily B, member 4   |
| NR_029468            | <b>Snhg12</b>                   | <b>6.370</b>                 | 1.37E-04    | small nucleolar RNA host gene 12                                                   |
| NM_027519            | <b>Medag</b>                    | <b>6.247</b>                 | 8.16E-04    | mesenteric estrogen dependent adipogenesis                                         |
| NM_001164197         | <b>Mmp19</b>                    | <b>6.190</b>                 | 0.007614046 | matrix metalloproteinase 19                                                        |
| NM_144554            | <b>Trib3</b>                    | <b>6.112</b>                 | 7.45E-05    | tribbles homolog 3 (Drosophila)                                                    |
| NM_019738            | <b>Nupr1</b>                    | <b>5.950</b>                 | 2.55E-04    | nuclear protein transcription regulator 1                                          |
| NR_002896            | <b>Snhg1</b>                    | <b>5.939</b>                 | 4.26E-05    | small nucleolar RNA host gene (non-protein coding) 1                               |
| NM_021274            | <b>Cxcl10</b>                   | <b>5.914</b>                 | 1.21E-04    | chemokine (C-X-C motif) ligand 10                                                  |
| NM_001135151         | <b>Slc39a14</b>                 | <b>5.897</b>                 | 1.15E-04    | solute carrier family 39 (zinc transporter), member 14                             |
| NM_007539            | <b>Bdkrb1</b>                   | <b>5.858</b>                 | 4.26E-05    | bradykinin receptor, beta 1                                                        |
| NM_019568            | <b>Cxcl14</b>                   | <b>5.746</b>                 | 0.002195939 | chemokine (C-X-C motif) ligand 14                                                  |
| NM_007431            | <b>Alpl</b>                     | <b>5.713</b>                 | 2.35E-04    | alkaline phosphatase, liver/bone/kidney                                            |
| NM_009711            | <b>Artn</b>                     | <b>5.634</b>                 | 6.45E-04    | artemin                                                                            |
| NM_001190161         | <b>Psrc1</b>                    | <b>5.605</b>                 | 2.80E-04    | proline/serine-rich coiled-coil 1                                                  |
| NM_011404            | <b>Slc7a5</b>                   | <b>5.598</b>                 | 1.58E-04    | solute carrier family 7 (cationic amino acid transporter, y+ system), member 5     |
| NM_008605            | <b>Mmp12</b>                    | <b>5.555</b>                 | 0.001380294 | matrix metalloproteinase 12                                                        |
| NM_011337            | <b>Ccl3</b>                     | <b>5.386</b>                 | 5.26E-04    | chemokine (C-C motif) ligand 3                                                     |
| NM_183160            | <b>Tmem252</b>                  | <b>5.382</b>                 | 1.21E-04    | transmembrane protein 252                                                          |
| NM_011075            | <b>Abcb1b</b>                   | <b>5.376</b>                 | 1.68E-04    | ATP-binding cassette, sub-family B (MDR/TAP), member 1B                            |
| NM_199447            | <b>Rrp12</b>                    | <b>5.290</b>                 | 5.92E-05    | ribosomal RNA processing 12 homolog (S. cerevisiae)                                |
| NM_010220            | <b>Fkbp5</b>                    | <b>5.261</b>                 | 0.0017525   | FK506 binding protein 5                                                            |
| NM_175307            | <b>Fam46b</b>                   | <b>5.235</b>                 | 2.76E-04    | family with sequence similarity 46, member B                                       |
| NM_001038604         | <b>Clec5a</b>                   | <b>5.199</b>                 | 0.009944347 | C-type lectin domain family 5, member a                                            |
| NM_001081328         | <b>Chsy3</b>                    | <b>5.163</b>                 | 0.003958511 | chondroitin sulfate synthase 3                                                     |
| NM_173036            | <b>Gpr97</b>                    | <b>5.114</b>                 | 8.08E-04    | G protein-coupled receptor 97                                                      |
| NM_205820            | <b>Tlr13</b>                    | <b>5.111</b>                 | 8.74E-04    | toll-like receptor 13                                                              |
| NM_007403            | <b>Adam8</b>                    | <b>5.094</b>                 | 6.52E-05    | a disintegrin and metalloproteinase domain 8                                       |
| NM_011338            | <b>Ccl9</b>                     | <b>5.008</b>                 | 3.63E-04    | chemokine (C-C motif) ligand 9                                                     |
| NM_007408            | <b>Plin2</b>                    | <b>4.997</b>                 | 9.11E-05    | perilipin 2                                                                        |
| NM_001172205         | <b>Arid5a</b>                   | <b>4.997</b>                 | 7.45E-05    | AT rich interactive domain 5A (MRF1-like)                                          |
| NM_009705            | <b>Arg2</b>                     | <b>4.978</b>                 | 0.002089744 | arginase type II                                                                   |
| NM_008350            | <b>Il11</b>                     | <b>4.961</b>                 | 8.86E-04    | interleukin 11                                                                     |
| NM_008046            | <b>Fst</b>                      | <b>4.940</b>                 | 9.09E-04    | follicle-stimulating hormone receptor                                              |
| NM_178595            | <b>Ptrh1</b>                    | <b>4.877</b>                 | 1.52E-04    | peptidyl-tRNA hydrolase 1 homolog (S. cerevisiae)                                  |
| NM_028351            | <b>Rspa3</b>                    | <b>4.850</b>                 | 0.003096426 | R-spondin 3 homolog (Xenopus laevis)                                               |
| NM_007498            | <b>Atf3</b>                     | <b>4.812</b>                 | 1.39E-04    | activating transcription factor 3                                                  |
| NM_027514            | <b>Pvr</b>                      | <b>4.805</b>                 | 3.17E-04    | poliovirus receptor                                                                |
| NM_021406            | <b>Trem1</b>                    | <b>4.744</b>                 | 0.007444954 | triggering receptor expressed on myeloid cells 1                                   |
| NM_011267            | <b>Rgs16</b>                    | <b>4.717</b>                 | 2.77E-04    | regulator of G-protein signaling 16                                                |
| NM_001082960         | <b>Itgam</b>                    | <b>4.697</b>                 | 0.008168832 | integrin alpha M                                                                   |
| NM_153543            | <b>Aldh1l2</b>                  | <b>4.692</b>                 | 2.56E-04    | aldehyde dehydrogenase 1 family, member L2                                         |
| NM_010664            | <b>Krt18</b>                    | <b>4.610</b>                 | 7.96E-05    | keratin 18                                                                         |
| NM_013473            | <b>Anxa8</b>                    | <b>4.603</b>                 | 0.001603919 | annexin A8                                                                         |
| NM_001099792         | <b>Trtm61a</b>                  | <b>4.583</b>                 | 1.16E-04    | tRNA methyltransferase 61A                                                         |
| NM_199223            | <b>Rtn4r12</b>                  | <b>4.568</b>                 | 1.21E-04    | reticulon 4 receptor-like 2                                                        |
| NM_009364            | <b>Tfpi2</b>                    | <b>4.564</b>                 | 2.05E-04    | tissue factor pathway inhibitor 2                                                  |
| NM_010441            | <b>Hmga2</b>                    | <b>4.558</b>                 | 5.12E-04    | high mobility group AT-hook 2                                                      |
| NM_021362            | <b>Pappa</b>                    | <b>4.558</b>                 | 1.14E-04    | pregnancy-associated plasma protein A                                              |
| NM_008416            | <b>Junb</b>                     | <b>4.551</b>                 | 5.14E-04    | Jun-B oncogene                                                                     |
| NM_011498            | <b>Bhlhe40</b>                  | <b>4.510</b>                 | 1.04E-04    | basic helix-loop-helix family, member e40                                          |
| NM_013750            | <b>Phlda3</b>                   | <b>4.501</b>                 | 6.71E-04    | pleckstrin homology-like domain, family A, member 3                                |
| NM_023716            | <b>Tubb2a-ps2//Tubb2b</b>       | <b>4.495</b>                 | 2.11E-04    | tubulin, beta 2a, pseudogene 2//tubulin, beta 2B class IIB                         |
| NM_001024619         | <b>Tsku</b>                     | <b>4.486</b>                 | 1.50E-04    | tsukushi                                                                           |
| NM_023731            | <b>Ccdc86</b>                   | <b>4.484</b>                 | 1.58E-04    | coiled-coil domain containing 86                                                   |
| NM_010050            | <b>Dio2</b>                     | <b>4.435</b>                 | 6.05E-04    | deiodinase, iodothyronine, type II                                                 |
| NM_019967            | <b>Dbc1</b>                     | <b>4.383</b>                 | 7.07E-04    | deleted in bladder cancer 1 (human)                                                |
| NM_153287            | <b>Csrnp1</b>                   | <b>4.352</b>                 | 1.08E-04    | cysteine-serine-rich nuclear protein 1                                             |
| NM_025878            | <b>Mrps18b</b>                  | <b>4.348</b>                 | 4.26E-05    | mitochondrial ribosomal protein S18B                                               |
| NM_025310            | <b>Ftsj3</b>                    | <b>4.342</b>                 | 2.79E-04    | FtsJ homolog 3 (E. coli)                                                           |
| NM_153547            | <b>Gnl3</b>                     | <b>4.300</b>                 | 5.78E-05    | guanine nucleotide binding protein-like 3 (nucleolar)                              |
| NM_001136079         | <b>Ptger4</b>                   | <b>4.296</b>                 | 1.68E-04    | prostaglandin E receptor 4 (subtype EP4)                                           |
| NM_009841            | <b>Cd14</b>                     | <b>4.292</b>                 | 0.00129915  | CD14 antigen                                                                       |
| NM_028810            | <b>Rnd3</b>                     | <b>4.284</b>                 | 1.29E-04    | Rho family GTPase 3                                                                |
| NM_013614            | <b>Odc1</b>                     | <b>4.218</b>                 | 4.72E-05    | ornithine decarboxylase, structural 1                                              |
| NM_011580            | <b>Palad1//Thbs1</b>            | <b>4.205</b>                 | 7.57E-05    | phosphatase domain containing, paladin 1//thrombospondin 1                         |
| NM_010104            | <b>Edn1</b>                     | <b>4.199</b>                 | 2.91E-04    | endothelin 1                                                                       |
| NM_001159394         | <b>Nfkbiz</b>                   | <b>4.195</b>                 | 0.001026998 | nuclear factor of kappa light polypeptide gene enhancer in B cells inhibitor, zeta |
| NM_027193            | <b>Dph5</b>                     | <b>4.185</b>                 | 7.96E-05    | DPH5 homolog (S. cerevisiae)                                                       |
| NM_013529            | <b>Gjpt2</b>                    | <b>4.157</b>                 | 4.26E-05    | glutamine fructose-6-phosphate transaminase 2                                      |
| NM_008872            | <b>Plat</b>                     | <b>4.145</b>                 | 1.40E-04    | plasminogen activator, tissue                                                      |
| NM_008773            | <b>P2ry2</b>                    | <b>4.141</b>                 | 0.001198904 | purinergic receptor P2Y, G-protein coupled 2                                       |
| NM_145495            | <b>Rin1</b>                     | <b>4.138</b>                 | 1.29E-04    | Ras and Rab interactor 1                                                           |
| NM_009779            | <b>C3ar1</b>                    | <b>4.114</b>                 | 2.39E-04    | complement component 3a receptor 1                                                 |
| NM_001163346         | <b>Cdc42ep4</b>                 | <b>4.082</b>                 | 1.63E-04    | CDC42 effector protein (Rho GTPase binding) 4                                      |
| NM_029665            | <b>Xm1//Ipo11//LOC100504500</b> | <b>4.059</b>                 | 0.005588106 | importin 11//leucine-rich repeat-containing protein 70-like                        |

| RefSeq Transcript ID | Gene Symbol       | *FC (Air vs O <sub>2</sub> ) | p (Corr)    | Gene Title                                                                                     |
|----------------------|-------------------|------------------------------|-------------|------------------------------------------------------------------------------------------------|
| NM_001110809         | <i>Gpatch4</i>    | 4.049                        | 1.29E-04    | G patch domain containing 4                                                                    |
| NM_021560            | <i>Bhlhe22</i>    | 4.033                        | 3.90E-04    | basic helix-loop-helix family, member e22                                                      |
| NM_009831            | <i>Ccng1</i>      | 4.024                        | 1.29E-04    | cyclin G1                                                                                      |
| NM_013737            | <i>Pla2g7</i>     | 3.998                        | 0.007231838 | phospholipase A2, group VII (platelet-activating factor acetylhydrolase, plasma)               |
| NM_011400            | <i>Slc2a1</i>     | 3.940                        | 2.89E-04    | solute carrier family 2 (facilitated glucose transporter), member 1                            |
| NM_009272            | <i>Srm</i>        | 3.928                        | 1.12E-04    | spermidine synthase                                                                            |
| NM_016748            | <i>Ctps</i>       | 3.921                        | 1.08E-04    | cytidine 5'-triphosphate synthase                                                              |
| NM_018868            | <i>Nop58</i>      | 3.918                        | 5.00E-04    | NOP58 ribonucleoprotein                                                                        |
| NM_010516            | <i>Cyr61</i>      | 3.908                        | 7.73E-05    | cysteine rich protein 61                                                                       |
| NM_009853            | <i>Cd68</i>       | 3.885                        | 0.001188299 | CD68 antigen                                                                                   |
| NM_053110            | <i>Gpnmb</i>      | 3.877                        | 6.98E-04    | glycoprotein (transmembrane) nmb                                                               |
| NM_007527            | <i>Bax</i>        | 3.877                        | 7.57E-05    | BCL2-associated X protein                                                                      |
| NM_001142706         | <i>C2</i>         | 3.876                        | 0.001561041 | complement component 2 (within H-2S)///complement factor B                                     |
| NM_011113            | <i>Plaur</i>      | 3.861                        | 5.25E-04    | plasminogen activator, urokinase receptor                                                      |
| NM_010045            | <i>Darc</i>       | 3.847                        | 9.17E-05    | Duffy blood group, chemokine receptor                                                          |
| NM_001166402         | <i>Tnfrsf3</i>    | 3.835                        | 1.96E-04    | tumor necrosis factor, alpha-induced protein 3                                                 |
| NM_197982            | <i>Ddx39</i>      | 3.819                        | 4.26E-05    | DEAD (Asp-Glu-Ala-Asp) box polypeptide 39                                                      |
| NM_001134385         | <i>Gpr160</i>     | 3.817                        | 1.27E-04    | G protein-coupled receptor 160                                                                 |
| NM_025443            | <i>Pno1</i>       | 3.813                        | 1.68E-04    | partner of NOB1 homolog (S. cerevisiae)                                                        |
| NM_001170785         | <i>Mthfd1l</i>    | 3.801                        | 2.69E-04    | methylenetetrahydrofolate dehydrogenase (NADP+ dependent) 1-like                               |
| NM_026963            | <i>Lzic</i>       | 3.780                        | 6.57E-05    | leucine zipper and CTNBP1 domain containing                                                    |
| NM_001271705         | <i>Pgf</i>        | 3.779                        | 7.38E-05    | placental growth factor                                                                        |
| NM_011087            | <i>Pira1</i>      | 3.771                        | 0.00984946  | paired-Ig-like receptor A1                                                                     |
| NM_001077189         | <i>Fcgr2b</i>     | 3.770                        | 0.001867556 | Fc receptor, IgG, low affinity IIb                                                             |
| NR_051981            | <i>H2-Q5</i>      | 3.761                        | 0.00129915  | histocompatibility 2, Q region locus 5///histocompatibility 2, K1, K region                    |
| NM_009747            | <i>Bdkrb2</i>     | 3.751                        | 2.42E-04    | bradykinin receptor, beta 2                                                                    |
| NM_001093749         | <i>Mpz13</i>      | 3.741                        | 6.80E-04    | myelin protein zero-like 3                                                                     |
| NM_021511            | <i>Rrs1</i>       | 3.736                        | 7.45E-05    | RRS1 ribosome biogenesis regulator homolog (S. cerevisiae)                                     |
| NM_010728            | <i>Lox</i>        | 3.726                        | 5.78E-05    | lysyl oxidase                                                                                  |
| NM_153419            | <i>Grwd1</i>      | 3.725                        | 7.96E-05    | glutamate-rich WD repeat containing 1                                                          |
| NM_011314            | <i>Saa2</i>       | 3.723                        | 0.008600426 | serum amyloid A 2                                                                              |
| NM_031170            | <i>Krt8</i>       | 3.715                        | 1.03E-04    | keratin 8                                                                                      |
| NM_012055            | <i>Asns</i>       | 3.708                        | 8.78E-05    | asparagine synthetase                                                                          |
| NM_053108            | <i>Glrx</i>       | 3.684                        | 0.006439096 | glutaredoxin                                                                                   |
| NM_023158            | <i>Cxcl16</i>     | 3.658                        | 6.52E-05    | chemokine (C-X-C motif) ligand 16                                                              |
| NM_011898            | <i>Spry4</i>      | 3.651                        | 1.58E-04    | sprouty homolog 4 (Drosophila)                                                                 |
| NM_175314            | <i>Adamts9</i>    | 3.641                        | 0.001160721 | a disintegrin-like and metalloproteinase (reprolysin type) with thrombospondin type 1 motif, 9 |
| NM_001145953         | <i>Lgals3</i>     | 3.637                        | 7.45E-05    | lectin, galactose binding, soluble 3                                                           |
| NM_031185            | <i>Akap12</i>     | 3.602                        | 1.14E-04    | A kinase (PRKA) anchor protein (gravin) 12                                                     |
| NM_019980            | <i>Litaf</i>      | 3.583                        | 1.33E-04    | LPS-induced TN factor                                                                          |
| NM_001272052         | <i>Ada</i>        | 3.574                        | 2.29E-04    | adenosine deaminase                                                                            |
| NM_010188            | <i>Fcgr3</i>      | 3.552                        | 0.006187574 | Fc receptor, IgG, low affinity III                                                             |
| NM_008651            | <i>Mybl1</i>      | 3.532                        | 0.00204319  | myeloblastosis oncogene-like 1                                                                 |
| NM_134156            | <i>Actn1</i>      | 3.524                        | 2.41E-04    | actinin, alpha 1                                                                               |
| NM_013898            | <i>Timm8a1</i>    | 3.521                        | 7.43E-05    | translocase of inner mitochondrial membrane 8A1                                                |
| NM_001164074         | <i>Tgjf1</i>      | 3.518                        | 3.17E-04    | TGFB-induced factor homeobox 1                                                                 |
| NM_010212            | <i>Fhl2</i>       | 3.504                        | 7.57E-05    | four and a half LIM domains 2                                                                  |
| NM_001166391         | <i>F13a1</i>      | 3.494                        | 1.14E-04    | coagulation factor XIII, A1 subunit                                                            |
| NM_145610            | <i>Ppan</i>       | 3.485                        | 1.79E-04    | peter pan homolog (Drosophila)                                                                 |
| NM_026816            | <i>Gtf2f2</i>     | 3.478                        | 5.52E-04    | general transcription factor IIF, polypeptide 2                                                |
| NM_001103156         | <i>Steap2</i>     | 3.471                        | 5.00E-04    | six transmembrane epithelial antigen of prostate 2                                             |
| NM_201367            | <i>Gpr176</i>     | 3.470                        | 0.006621157 | G protein-coupled receptor 176                                                                 |
| NR_003964            | <i>Tubb2a-ps2</i> | 3.469                        | 9.30E-04    | tubulin, beta 2a, pseudogene 2///tubulin, beta 2B class IIB                                    |
| NM_022811            | <i>Polr1e</i>     | 3.461                        | 7.43E-05    | polymerase (RNA) I polypeptide E                                                               |
| NM_001159631         | <i>Nek6</i>       | 3.450                        | 9.27E-04    | NIMA (never in mitosis gene a)-related expressed kinase 6                                      |
| NM_053113            | <i>Ear11</i>      | 3.449                        | 1.68E-04    | eosinophil-associated, ribonuclease A family, member 11                                        |
| NM_011955            | <i>Nubp1</i>      | 3.440                        | 1.33E-04    | nucleotide binding protein 1                                                                   |
| NM_001164733         | <i>Mpp6</i>       | 3.404                        | 2.39E-04    | membrane protein, palmitoylated 6 (MAGUK p55 subfamily member 6)                               |
| NR_040721            | <i>Snhg5</i>      | 3.401                        | 3.40E-04    | small nucleolar RNA host gene 5                                                                |
| NM_177364            | <i>Sh3pxd2b</i>   | 3.401                        | 0.001733131 | SH3 and PX domains 2B                                                                          |
| NM_144810            | <i>Klhdc8a</i>    | 3.397                        | 3.74E-04    | kelch domain containing 8A                                                                     |
| NM_145535            | <i>Sdcbp2</i>     | 3.395                        | 1.29E-04    | syndecan binding protein (syntenin) 2                                                          |
| NM_008012            | <i>Akr1b8</i>     | 3.390                        | 1.07E-04    | aldo-keto reductase family 1, member B8                                                        |
| NM_026929            | <i>Chac1</i>      | 3.385                        | 0.002199478 | ChaC, cation transport regulator 1                                                             |
| NM_009716            | <i>Atf4</i>       | 3.385                        | 1.29E-04    | activating transcription factor 4                                                              |
| NM_020047            | <i>Tacstd2</i>    | 3.382                        | 0.008238319 | tumor-associated calcium signal transducer 2                                                   |
| NM_011175            | <i>Lgmn</i>       | 3.374                        | 1.68E-04    | legumain                                                                                       |
| NM_001163478         | <i>Rabggtb</i>    | 3.367                        | 1.29E-04    | RAB geranylgeranyl transferase, b subunit                                                      |
| NM_198664            | <i>Tbc1d2</i>     | 3.360                        | 2.76E-04    | TBC1 domain family, member 2                                                                   |
| NM_001276301         | <i>Ampd3</i>      | 3.358                        | 0.001810649 | adenosine monophosphate deaminase 3                                                            |
| NM_001252588         | <i>Tspan4</i>     | 3.348                        | 7.25E-04    | tetraspanin 4                                                                                  |
| NM_001029842         | <i>Slc16a6</i>    | 3.347                        | 8.90E-05    | solute carrier family 16 (monocarboxylic acid transporters), member 6                          |
| NM_007513            | <i>Slc7a1</i>     | 3.343                        | 6.27E-04    | solute carrier family 7 (cationic amino acid transporter, y+ system), member 1                 |
| NM_134139            | <i>Wdr74</i>      | 3.322                        | 9.11E-05    | WD repeat domain 74                                                                            |
| NM_010401            | <i>Hal</i>        | 3.316                        | 0.006537725 | histidine ammonia lyase                                                                        |
| NM_011656            | <i>Tuft1</i>      | 3.303                        | 6.66E-04    | tuftelin 1                                                                                     |
| NR_024067            | <i>Snhg6</i>      | 3.293                        | 1.46E-04    | small nucleolar RNA host gene (non-protein coding) 6                                           |
| NR_002840            | <i>Gas5</i>       | 3.291                        | 0.006950962 | growth arrest specific 5///small nucleolar RNA, C/D box 47                                     |
| NM_023044            | <i>Slc15a3</i>    | 3.273                        | 7.02E-04    | solute carrier family 15, member 3                                                             |
| NM_026631            | <i>Nhp2</i>       | 3.267                        | 7.45E-05    | NHP2 ribonucleoprotein                                                                         |
| NM_008471            | <i>Krt19</i>      | 3.256                        | 2.92E-04    | keratin 19                                                                                     |
| NM_009396            | <i>Tnfrsf2</i>    | 3.255                        | 6.99E-04    | tumor necrosis factor, alpha-induced protein 2                                                 |
| NM_001013389         | <i>Mrs2</i>       | 3.254                        | 1.17E-04    | MRS2 magnesium homeostasis factor homolog (S. cerevisiae)                                      |

| RefSeq Transcript ID                    | Gene Symbol      | *FC (Air vs O <sub>2</sub> ) | p (Corr)    | Gene Title                                                                                      |
|-----------------------------------------|------------------|------------------------------|-------------|-------------------------------------------------------------------------------------------------|
| NM_018781                               | <i>Egr3</i>      | 3.247                        | 2.89E-04    | early growth response 3                                                                         |
| NM_020275                               | <i>Tnfrsf10b</i> | 3.234                        | 2.39E-04    | tumor necrosis factor receptor superfamily, member 10b                                          |
| NM_007679                               | <i>Cebpd</i>     | 3.228                        | 4.79E-04    | CCAAT/enhancer binding protein (C/EBP), delta                                                   |
| NM_007771                               | <i>Cry1</i>      | 3.223                        | 7.13E-05    | cryptochrome 1 (photolyase-like)                                                                |
| NM_022032                               | <i>Perp</i>      | 3.213                        | 7.45E-05    | PERP, TP53 apoptosis effector                                                                   |
| NM_009917                               | <i>Ccr5</i>      | 3.210                        | 6.55E-04    | chemokine (C-C motif) receptor 5                                                                |
| NM_019501                               | <i>Pdss1</i>     | 3.206                        | 7.23E-04    | prenyl (solaneyl) diphosphate synthase, subunit 1                                               |
| NM_009448//NR_C Gm6682//Tuba1c          |                  | 3.199                        | 8.77E-05    | tubulin, alpha 1C pseudogene//tubulin, alpha 1C                                                 |
| NM_033601                               | <i>Bcl3</i>      | 3.191                        | 9.21E-04    | B cell leukemia/lymphoma 3                                                                      |
| NM_028798                               | <i>Crct1</i>     | 3.185                        | 6.02E-04    | cysteine-rich C-terminal 1                                                                      |
| NM_153065                               | <i>Ddx27</i>     | 3.184                        | 1.74E-04    | DEAD (Asp-Glu-Ala-Asp) box polypeptide 27                                                       |
| NM_031380                               | <i>Fstl3</i>     | 3.177                        | 1.71E-04    | folliculin-like 3                                                                               |
| NM_001113478//N Frs1                    |                  | 3.172                        | 5.01E-04    | ferric-chelate reductase 1                                                                      |
| NM_009369                               | <i>Tgfb1</i>     | 3.168                        | 6.99E-04    | transforming growth factor, beta induced                                                        |
| NM_023579                               | <i>Ipo5</i>      | 3.165                        | 7.43E-05    | importin 5                                                                                      |
| NM_001114087//N Pdlim7                  |                  | 3.163                        | 3.72E-04    | PDZ and LIM domain 7                                                                            |
| NM_013743                               | <i>Pdk4</i>      | 3.158                        | 7.66E-04    | pyruvate dehydrogenase kinase, isoenzyme 4                                                      |
| NM_001166672//N Lira6//Pira1            |                  | 3.145                        | 0.005276636 | leukocyte immunoglobulin-like receptor, subfamily A (with TM domain), member 6 receptor A11     |
| NM_001271607//N Cxcr7                   |                  | 3.144                        | 8.94E-04    | chemokine (C-X-C motif) receptor 7                                                              |
| NM_001130457//N Tbrg4                   |                  | 3.138                        | 7.96E-05    | transforming growth factor beta regulated gene 4                                                |
| NM_026041                               | <i>Rrp15</i>     | 3.133                        | 8.04E-05    | ribosomal RNA processing 15 homolog ( <i>S. cerevisiae</i> )                                    |
| NM_008967                               | <i>Ptgir</i>     | 3.131                        | 0.001501375 | prostaglandin I receptor (IP)                                                                   |
| NM_019432                               | <i>Tmem37</i>    | 3.128                        | 2.47E-04    | transmembrane protein 37                                                                        |
| NM_011414                               | <i>Slpi</i>      | 3.115                        | 0.001914019 | secretory leukocyte peptidase inhibitor                                                         |
| NM_009921                               | <i>Camp</i>      | 3.102                        | 0.002404555 | cathelicidin antimicrobial peptide                                                              |
| NM_019670                               | <i>Diap3</i>     | 3.099                        | 0.005023152 | diaphanous homolog 3 ( <i>Drosophila</i> )                                                      |
| NM_183029                               | <i>Igf2bp2</i>   | 3.099                        | 6.57E-05    | insulin-like growth factor 2 mRNA binding protein 2                                             |
| NM_001168333//N Tinaql1                 |                  | 3.088                        | 3.72E-04    | tubulointerstitial nephritis antigen-like 1                                                     |
| NM_175259                               | <i>Shisa4</i>    | 3.076                        | 6.13E-04    | shisa homolog 4 ( <i>Xenopus laevis</i> )                                                       |
| NM_009994                               | <i>Cyp1b1</i>    | 3.070                        | 7.05E-04    | cytochrome P450, family 1, subfamily b, polypeptide 1                                           |
| NM_010792                               | <i>Mettl1</i>    | 3.060                        | 2.76E-04    | methyltransferase like 1                                                                        |
| NM_020010                               | <i>Cyp51</i>     | 3.045                        | 3.77E-04    | cytochrome P450, family 51                                                                      |
| NM_145404                               | <i>Prmt7</i>     | 3.037                        | 6.55E-04    | protein arginine N-methyltransferase 7                                                          |
| NM_153561                               | <i>Nudt6</i>     | 3.035                        | 3.06E-04    | nudix (nucleoside diphosphate linked moiety X)-type motif 6                                     |
| NM_009448//NR_C Gm6682//Tuba1c//LOC101i |                  | 3.026                        | 9.20E-05    | tubulin, alpha 1C pseudogene//tubulin, alpha 1C//tubulin alpha-1C chain-like//tubulin, alpha 1A |
| NM_010120//NM_Ejfla//BB287469//Gm4027   |                  | 3.021                        | 3.72E-04    | eukaryotic translation initiation factor 1A//expressed sequence BB287469//predicted gene 4027   |
| NM_011198                               | <i>Ptgs2</i>     | 3.016                        | 4.95E-04    | prostaglandin-endoperoxide synthase 2                                                           |
| NM_183168                               | <i>P2ry6</i>     | 3.014                        | 1.41E-04    | pyrimidinergic receptor P2Y, G-protein coupled, 6                                               |
| NM_009121                               | <i>Sat1</i>      | 3.010                        | 2.34E-04    | spermidine/spermine N1-acetyl transferase 1                                                     |
| NM_009046                               | <i>Relb</i>      | 3.009                        | 2.88E-04    | avian reticuloendotheliosis viral (v-rel) oncogene related B                                    |
| NM_010481                               | <i>Hspa9</i>     | 2.996                        | 8.97E-05    | heat shock protein 9                                                                            |
| NM_023040//NM_Gfer                      |                  | 2.985                        | 7.82E-05    | growth factor, erv1 ( <i>S. cerevisiae</i> )-like (augmenter of liver regeneration)             |
| NM_018820                               | <i>Sertad1</i>   | 2.985                        | 3.67E-04    | SERTA domain containing 1                                                                       |
| NM_001004140                            | <i>Ckap2</i>     | 2.984                        | 2.83E-04    | cytoskeleton associated protein 2                                                               |
| NM_001039185//N Ceacam1//Ceacam2        |                  | 2.977                        | 1.83E-04    | carcinoembryonic antigen-related cell adhesion molecule 1                                       |
| NM_008006                               | <i>Fgf2</i>      | 2.975                        | 0.00130335  | fibroblast growth factor 2                                                                      |
| NM_001024945//N Qsox1                   |                  | 2.973                        | 5.85E-04    | quiescin Q6 sulfhydryl oxidase 1                                                                |
| NM_029614                               | <i>Prss23</i>    | 2.965                        | 3.77E-04    | protease, serine, 23                                                                            |
| NM_029662                               | <i>Mfsd2a</i>    | 2.964                        | 0.00984946  | major facilitator superfamily domain containing 2A                                              |
| NM_024215                               | <i>Zfp593</i>    | 2.962                        | 2.06E-04    | zinc finger protein 593                                                                         |
| NM_177325                               | <i>Tsr1</i>      | 2.958                        | 8.83E-05    | TSR1 20S rRNA accumulation                                                                      |
| NM_001199060//N Wdr12                   |                  | 2.958                        | 1.27E-04    | WD repeat domain 12                                                                             |
| NM_007793                               | <i>Cstb</i>      | 2.954                        | 1.14E-04    | cystatin B                                                                                      |
| NM_028766                               | <i>Tmem43</i>    | 2.954                        | 2.64E-04    | transmembrane protein 43                                                                        |
| NM_008519                               | <i>Ltb4r1</i>    | 2.950                        | 0.001985311 | leukotriene B4 receptor 1                                                                       |
| NM_178605                               | <i>Nop16</i>     | 2.940                        | 7.96E-05    | NOP16 nucleolar protein                                                                         |
| NM_027450                               | <i>Glipr2</i>    | 2.936                        | 0.001501375 | GLI pathogenesis-related 2                                                                      |
| NM_001205173//N Iffa2                   |                  | 2.929                        | 3.77E-04    | intermediate filament family orphan 2                                                           |
| NM_011019                               | <i>Osmr</i>      | 2.924                        | 4.76E-04    | oncostatin M receptor                                                                           |
| NM_001164357//N Slc25a25                |                  | 2.923                        | 2.39E-04    | solute carrier family 25 (mitochondrial carrier, phosphate carrier), member 25                  |
| NM_026072                               | <i>Cwc27</i>     | 2.912                        | 9.34E-05    | CWC27 spliceosome-associated protein homolog ( <i>S. cerevisiae</i> )                           |
| NM_001109657//N Gas7                    |                  | 2.910                        | 1.85E-04    | growth arrest specific 7                                                                        |
| NM_001033187//N Btb19                   |                  | 2.908                        | 1.05E-04    | BTB (POZ) domain containing 19                                                                  |
| NM_178890                               | <i>Abtb2</i>     | 2.908                        | 0.004193235 | ankyrin repeat and BTB (POZ) domain containing 2                                                |
| NM_009855                               | <i>Cd80</i>      | 2.891                        | 4.65E-04    | CD80 antigen                                                                                    |
| NM_153159                               | <i>Zc3h12a</i>   | 2.884                        | 0.008351559 | zinc finger CCCH type containing 12A                                                            |
| NM_178591                               | <i>Nrg1</i>      | 2.880                        | 3.49E-04    | neuregulin 1                                                                                    |
| NM_146041                               | <i>Gm5s</i>      | 2.870                        | 3.51E-04    | GDP-mannose 4, 6-dehydratase                                                                    |
| NM_027985                               | <i>Mad2l2</i>    | 2.859                        | 1.29E-04    | MAD2 mitotic arrest deficient-like 2                                                            |
| NM_153507                               | <i>Cpne2</i>     | 2.853                        | 7.68E-04    | copine II                                                                                       |
| NM_008889                               | <i>Ppp1r14b</i>  | 2.851                        | 7.45E-05    | protein phosphatase 1, regulatory (inhibitor) subunit 14B                                       |
| NM_013899                               | <i>Timm10</i>    | 2.830                        | 8.49E-05    | translocase of inner mitochondrial membrane 10                                                  |
| NM_013868                               | <i>Hspb7</i>     | 2.830                        | 6.30E-04    | heat shock protein family, member 7 (cardiovascular)                                            |
| NM_010798                               | <i>Mif</i>       | 2.816                        | 1.68E-04    | macrophage migration inhibitory factor                                                          |
| NM_179203                               | <i>Atad3a</i>    | 2.813                        | 9.66E-05    | ATPase family, AAA domain containing 3A                                                         |
| NM_008102                               | <i>Gch1</i>      | 2.811                        | 7.20E-04    | GTP cyclohydrolase 1                                                                            |
| NM_008037                               | <i>Fosl2</i>     | 2.810                        | 2.86E-04    | fos-like antigen 2                                                                              |
| NM_026438                               | <i>Ppa1</i>      | 2.810                        | 6.03E-04    | pyrophosphatase (inorganic) 1                                                                   |
| NM_175096                               | <i>Stbd1</i>     | 2.808                        | 6.75E-04    | starch binding domain 1                                                                         |
| NM_007984                               | <i>Fscn1</i>     | 2.807                        | 4.42E-04    | fascin homolog 1, actin bundling protein ( <i>Strongylocentrotus purpuratus</i> )               |
| NM_011574                               | <i>Cirha1</i>    | 2.805                        | 1.01E-04    | cirrhosis, autosomal recessive 1A (human)                                                       |
| NM_009026                               | <i>Rasd1</i>     | 2.797                        | 0.007411147 | RAS, dexamethasone-induced 1                                                                    |
| NM_145419                               | <i>Hkd1</i>      | 2.790                        | 0.004679649 | hexokinase domain containing 1                                                                  |

| RefSeq Transcript ID | Gene Symbol    | *FC (Air vs O <sub>2</sub> ) | p (Corr)    | Gene Title                                                                                 |
|----------------------|----------------|------------------------------|-------------|--------------------------------------------------------------------------------------------|
| NM_001082976         | <b>Tc2n</b>    | <b>2.787</b>                 | 0.006999408 | tandem C2 domains, nuclear                                                                 |
| NM_012048            | <b>Polk</b>    | <b>2.784</b>                 | 0.00198089  | polymerase (DNA directed), kappa                                                           |
| NM_008013            | <b>Fgl2</b>    | <b>2.780</b>                 | 6.30E-04    | fibrinogen-like protein 2                                                                  |
| NM_025297            | <b>Mecr</b>    | <b>2.778</b>                 | 2.39E-04    | mitochondrial trans-2-enoyl-CoA reductase                                                  |
| NM_029005            | <b>Mkl1</b>    | <b>2.771</b>                 | 9.06E-04    | mixed lineage kinase domain-like                                                           |
| NM_178403            | <b>Pus7</b>    | <b>2.768</b>                 | 0.001967898 | pseudouridylyl synthase 7 homolog (S. cerevisiae)                                          |
| NM_145987            | <b>Tmem82</b>  | <b>2.766</b>                 | 1.63E-04    | transmembrane protein 82                                                                   |
| NM_175639            | <b>Wdr43</b>   | <b>2.758</b>                 | 7.57E-05    | WD repeat domain 43                                                                        |
| NM_030244            | <b>Ier5l</b>   | <b>2.755</b>                 | 0.00150021  | immediate early response 5-like                                                            |
| NM_026578            | <b>Gar1</b>    | <b>2.751</b>                 | 9.27E-05    | GAR1 ribonucleoprotein homolog (yeast)                                                     |
| NM_011311            | <b>S100a4</b>  | <b>2.751</b>                 | 1.89E-04    | S100 calcium binding protein A4                                                            |
| NM_008690            | <b>Nfkbie</b>  | <b>2.748</b>                 | 2.76E-04    | nuclear factor of kappa light polypeptide gene enhancer in B cells inhibitor, epsilon      |
| NM_175113            | <b>Trmt6</b>   | <b>2.747</b>                 | 2.59E-04    | tRNA methyltransferase 6                                                                   |
| NM_030701            | <b>Niacr1</b>  | <b>2.742</b>                 | 0.005598428 | niacin receptor 1                                                                          |
| NM_018754            | <b>Sfn</b>     | <b>2.739</b>                 | 0.001169223 | stratifin                                                                                  |
| NM_153570            | <b>Noc4l</b>   | <b>2.738</b>                 | 1.40E-04    | nucleolar complex associated 4 homolog (S. cerevisiae)                                     |
| NM_001080940         | <b>Gm6484</b>  | <b>2.736</b>                 | 1.68E-04    | predicted gene 6484                                                                        |
| NM_001042606         | <b>Sstr2</b>   | <b>2.734</b>                 | 0.001277622 | somatostatin receptor 2                                                                    |
| NM_007484            | <b>Rhoc</b>    | <b>2.727</b>                 | 1.16E-04    | ras homolog gene family, member C                                                          |
| NM_001109748         | <b>Tomm40</b>  | <b>2.725</b>                 | 0.001044687 | translocase of outer mitochondrial membrane 40 homolog (yeast)                             |
| NM_001193309         | <b>Morc4</b>   | <b>2.712</b>                 | 4.02E-04    | microorchidia 4                                                                            |
| NM_013562            | <b>Ifrd1</b>   | <b>2.708</b>                 | 7.10E-04    | interferon-related developmental regulator 1                                               |
| NM_011580            | <b>Palad1</b>  | <b>2.708</b>                 | 2.39E-04    | phosphatase domain containing, paladin 1                                                   |
| NM_175270            | <b>Sowahb</b>  | <b>2.706</b>                 | 8.64E-04    | sonosdown ankryrin repeat domain family member B                                           |
| NM_153566            | <b>Yrdc</b>    | <b>2.704</b>                 | 2.39E-04    | yrnC domain containing (E.coli)                                                            |
| NM_013594            | <b>Mbd1</b>    | <b>2.702</b>                 | 1.68E-04    | methyl-CpG binding domain protein 1                                                        |
| NM_028762            | <b>Rbm19</b>   | <b>2.701</b>                 | 1.97E-04    | RNA binding motif protein 19                                                               |
| NM_025897            | <b>Rrp8</b>    | <b>2.698</b>                 | 0.001770565 | ribosomal RNA processing 8, methyltransferase, homolog (yeast)                             |
| NM_007913            | <b>Egr1</b>    | <b>2.693</b>                 | 0.003242609 | early growth response 1                                                                    |
| NM_001113368         | <b>Ceacam2</b> | <b>2.690</b>                 | 1.11E-04    | carcinoembryonic antigen-related cell adhesion molecule 2                                  |
| NM_030724            | <b>Uck2</b>    | <b>2.687</b>                 | 2.71E-04    | uridine-cytidine kinase 2                                                                  |
| NM_015796            | <b>Fbxo17</b>  | <b>2.681</b>                 | 2.19E-04    | F-box protein 17                                                                           |
| NM_008969            | <b>Ptgs1</b>   | <b>2.681</b>                 | 8.18E-04    | prostaglandin-endoperoxide synthase 1                                                      |
| NM_029546            | <b>Pwp2</b>    | <b>2.676</b>                 | 3.51E-04    | PWP2 periodic tryptophan protein homolog (yeast)                                           |
| NM_133993            | <b>Pwp1</b>    | <b>2.670</b>                 | 1.68E-04    | PWP1 homolog (S. cerevisiae)                                                               |
| NM_001161329         | <b>Nol11</b>   | <b>2.670</b>                 | 7.41E-04    | nucleolar protein 11                                                                       |
| NM_028925            | <b>Polr3c</b>  | <b>2.660</b>                 | 1.09E-04    | polymerase (RNA) III (DNA directed) polypeptide C                                          |
| NM_013807            | <b>Plk3</b>    | <b>2.652</b>                 | 2.59E-04    | polo-like kinase 3                                                                         |
| NM_001042534         | <b>Capg</b>    | <b>2.639</b>                 | 0.001113707 | capping protein (actin filament), gelsolin-like                                            |
| NM_007991            | <b>Fbl</b>     | <b>2.633</b>                 | 9.66E-05    | fibrillarlin/rRNA 2'-O-methyltransferase fibrillarlin-like                                 |
| NM_007788            | <b>Csnk2a1</b> | <b>2.632</b>                 | 0.00156432  | casein kinase 2, alpha 1 polypeptide/casein kinase II subunit alpha-like                   |
| NM_019553            | <b>Dax21</b>   | <b>2.628</b>                 | 4.46E-04    | DEAD (Asp-Glu-Ala-Asp) box polypeptide 21                                                  |
| NM_013463            | <b>Gla</b>     | <b>2.628</b>                 | 6.71E-04    | galactosidase, alpha                                                                       |
| NM_028404            | <b>Top1mt</b>  | <b>2.628</b>                 | 3.91E-04    | DNA topoisomerase 1, mitochondrial                                                         |
| NM_001024604         | <b>Ankrd28</b> | <b>2.627</b>                 | 2.76E-04    | ankryrin repeat domain 28                                                                  |
| NM_001008700         | <b>Il4ra</b>   | <b>2.620</b>                 | 8.86E-04    | interleukin 4 receptor, alpha                                                              |
| NM_007994            | <b>Fbp2</b>    | <b>2.620</b>                 | 0.001792886 | fructose bisphosphatase 2                                                                  |
| NM_013671            | <b>Sod2</b>    | <b>2.618</b>                 | 0.002407445 | superoxide dismutase 2, mitochondrial                                                      |
| NM_001204979         | <b>Sars</b>    | <b>2.615</b>                 | 2.39E-04    | seryl-aminoacyl-tRNA synthetase                                                            |
| NM_025380            | <b>Eef1e1</b>  | <b>2.611</b>                 | 2.50E-04    | eukaryotic translation elongation factor 1 epsilon 1                                       |
| NM_001025561         | <b>Pus1</b>    | <b>2.611</b>                 | 7.96E-05    | pseudouridine synthase 1                                                                   |
| NM_001164107         | <b>Ripk3</b>   | <b>2.598</b>                 | 7.24E-04    | receptor-interacting serine-threonine kinase 3                                             |
| NM_001164426         | <b>Kcnk13</b>  | <b>2.595</b>                 | 8.66E-04    | potassium channel, subfamily K, member 13                                                  |
| NM_011448            | <b>Sox9</b>    | <b>2.591</b>                 | 2.56E-04    | SRY-box containing gene 9                                                                  |
| NM_026796            | <b>Smyd2</b>   | <b>2.582</b>                 | 4.49E-04    | SET and MYND domain containing 2                                                           |
| NM_009517            | <b>Zmat3</b>   | <b>2.577</b>                 | 1.32E-04    | zinc finger matrin type 3                                                                  |
| NM_001161413         | <b>Slc3a2</b>  | <b>2.576</b>                 | 1.69E-04    | solute carrier family 3 (activators of dibasic and neutral amino acid transport), member 2 |
| NM_026472            | <b>Mki67ip</b> | <b>2.575</b>                 | 1.88E-04    | Mki67 (FHA domain) interacting nucleolar phosphoprotein                                    |
| NM_010415            | <b>Hbegf</b>   | <b>2.571</b>                 | 4.66E-04    | heparin-binding EGF-like growth factor                                                     |
| NM_033073            | <b>Krt7</b>    | <b>2.565</b>                 | 5.07E-04    | keratin 7                                                                                  |
| NM_177388            | <b>Slc41a2</b> | <b>2.564</b>                 | 2.88E-04    | solute carrier family 41, member 2                                                         |
| NM_133974            | <b>Cdcp1</b>   | <b>2.555</b>                 | 6.29E-04    | CUB domain containing protein 1                                                            |
| NM_010658            | <b>Mafb</b>    | <b>2.554</b>                 | 2.02E-04    | v-maf musculoaponeurotic fibrosarcoma oncogene family, protein B (avian)                   |
| NM_019511            | <b>Ramp3</b>   | <b>2.540</b>                 | 0.002974334 | receptor (calcitonin) activity modifying protein 3                                         |
| NM_001252629         | <b>Smn1</b>    | <b>2.535</b>                 | 0.003288299 | survival motor neuron 1                                                                    |
| NM_026993            | <b>Ddah1</b>   | <b>2.535</b>                 | 0.001867556 | dimethylarginine dimethylaminohydrolase 1                                                  |
| NM_007686            | <b>Cfi</b>     | <b>2.534</b>                 | 0.00376992  | complement component factor i                                                              |
| NM_001164472         | <b>Nip7</b>    | <b>2.534</b>                 | 1.44E-04    | nuclear import 7 homolog (S. cerevisiae)                                                   |
| NM_009848            | <b>Entpd1</b>  | <b>2.532</b>                 | 0.001490762 | ectonucleoside triphosphate diphosphohydrolase 1                                           |
| NM_001111277         | <b>Eif2b3</b>  | <b>2.530</b>                 | 0.001250645 | eukaryotic translation initiation factor 2B, subunit 3                                     |
| NM_001159593         | <b>Slc20a1</b> | <b>2.530</b>                 | 1.31E-04    | solute carrier family 20, member 1                                                         |
| NM_008842            | <b>Pim1</b>    | <b>2.527</b>                 | 7.13E-04    | proviral integration site 1                                                                |
| NM_026545            | <b>Psmc8</b>   | <b>2.523</b>                 | 0.001149367 | proteasome (prosome, macropain) 26S subunit, non-ATPase, 8                                 |
| NM_028315            | <b>Dis3</b>    | <b>2.513</b>                 | 0.002015146 | DIS3 mitotic control homolog (S. cerevisiae)                                               |
| NM_172713            | <b>Sdad1</b>   | <b>2.510</b>                 | 6.66E-04    | SDA1 domain containing 1                                                                   |
| NM_001024703         | <b>Mctp2</b>   | <b>2.508</b>                 | 0.009495543 | multiple C2 domains, transmembrane 2                                                       |
| NM_001081214         | <b>Pprc1</b>   | <b>2.508</b>                 | 2.41E-04    | peroxisome proliferative activated receptor, gamma, coactivator-related 1                  |
| NM_001039515         | <b>Arl4a</b>   | <b>2.504</b>                 | 0.00135958  | ADP-ribosylation factor-like 4A                                                            |
| NM_011345            | <b>Sele</b>    | <b>2.502</b>                 | 6.01E-04    | selectin, endothelial cell                                                                 |
| NM_026268            | <b>Dusp6</b>   | <b>2.497</b>                 | 6.14E-04    | dual specificity phosphatase 6                                                             |
| NM_016966            | <b>Gm8096</b>  | <b>2.496</b>                 | 0.002043013 | 3-phosphoglycerate dehydrogenase pseudogene/3-phosphoglycerate dehydrogenase               |
| NM_198937            | <b>Hn1l</b>    | <b>2.495</b>                 | 8.24E-04    | hematological and neurological expressed 1-like                                            |
| NM_001032727         | <b>Sybu</b>    | <b>2.495</b>                 | 0.006600949 | syntabulin (syntaxin-interacting)                                                          |



| RefSeq Transcript                               | IC Gene Symbol  | *FC (Air vs O <sub>2</sub> ) | p (Corr)    | Gene Title                                                                                                 |
|-------------------------------------------------|-----------------|------------------------------|-------------|------------------------------------------------------------------------------------------------------------|
| NM_013789                                       | <i>Sergef</i>   | 2.491                        | 1.26E-04    | secretion regulating guanine nucleotide exchange factor                                                    |
| NM_027460//XM_ <i>Slc25a33</i>                  |                 | 2.490                        | 2.66E-04    | solute carrier family 25, member 33                                                                        |
| NM_025465                                       | <i>Tma16</i>    | 2.488                        | 0.001376601 | translation machinery associated 16 homolog (S. cerevisiae)                                                |
| NM_133787                                       | <i>Nmd3</i>     | 2.488                        | 2.76E-04    | NMD3 homolog (S. cerevisiae)                                                                               |
| NM_172930                                       | <i>Tmem255a</i> | 2.487                        | 0.002438871 | transmembrane protein 255A                                                                                 |
| NM_015816                                       | <i>Lsm4</i>     | 2.487                        | 1.96E-04    | LSM4 homolog, U6 small nuclear RNA associated (S. cerevisiae)                                              |
| NM_145632                                       | <i>Polr2h</i>   | 2.486                        | 2.76E-04    | polymerase (RNA) II (DNA directed) polypeptide H                                                           |
| NM_025431//XM_ <i>Gm12952//Gm14535//Lph</i>     |                 | 2.484                        | 1.33E-04    | predicted gene 12952//predicted pseudogene 14535//LLP homolog, long-term synaptic facilitation             |
| NM_145706                                       | <i>Nup43</i>    | 2.483                        | 1.87E-04    | nucleoporin 43                                                                                             |
| NM_016723//NM_ <i>Uchl3//Uchl4</i>              |                 | 2.483                        | 2.55E-04    | ubiquitin carboxyl-terminal esterase L3 (ubiquitin thiolesterase)//ubiquitin carboxyl-terminal esterase L4 |
| NM_007426                                       | <i>Angpt2</i>   | 2.482                        | 9.08E-04    | angiopoietin 2                                                                                             |
| NM_016776                                       | <i>Mybbp1a</i>  | 2.482                        | 2.26E-04    | MYB binding protein (P160) 1a                                                                              |
| NM_008873                                       | <i>Plau</i>     | 2.482                        | 0.001912931 | plasminogen activator, urokinase                                                                           |
| NM_026053//XM_ <i>Gemin6//Gm6253</i>            |                 | 2.481                        | 1.46E-04    | gem (nuclear organelle) associated protein 6//predicted pseudogene 6253                                    |
| NM_026464                                       | <i>Wdr55</i>    | 2.479                        | 1.01E-04    | WD repeat domain 55                                                                                        |
| NM_027000                                       | <i>Gtpbp4</i>   | 2.478                        | 1.68E-04    | GTP binding protein 4                                                                                      |
| NM_009373                                       | <i>Tgm2</i>     | 2.477                        | 1.67E-04    | transglutaminase 2, C polypeptide                                                                          |
| NM_145431                                       | <i>Nle1</i>     | 2.470                        | 8.65E-04    | notchless homolog 1 (Drosophila)                                                                           |
| NM_008654                                       | <i>Ppp1r15a</i> | 2.466                        | 0.003629632 | protein phosphatase 1, regulatory (inhibitor) subunit 15A                                                  |
| NM_001039824//N <i>Fdx1//Raver1-fdx1</i>        |                 | 2.464                        | 1.01E-04    | ferredoxin 1-like//Raver1-Fdx1 readthrough                                                                 |
| NM_013470                                       | <i>Anxa3</i>    | 2.461                        | 1.89E-04    | annexin A3                                                                                                 |
| NM_001025427//N <i>Hmga1//Hmga1-rs1</i>         |                 | 2.461                        | 0.006787071 | high mobility group AT-hook 1//high mobility group AT-hook 1, related sequence 1                           |
| NM_016966//NR_C <i>Gm8096//Phgdh//Gm6756</i>    |                 | 2.457                        | 0.002244629 | 3-phosphoglycerate dehydrogenase pseudogene//3-phosphoglycerate dehydrogenase                              |
| NM_010786                                       | <i>Mdm2</i>     | 2.452                        | 2.64E-04    | transformed mouse 3T3 cell double minute 2                                                                 |
| NM_133662                                       | <i>Ier3</i>     | 2.450                        | 1.31E-04    | immediate early response 3                                                                                 |
| NM_001039351//N <i>Nolc1</i>                    |                 | 2.447                        | 6.49E-04    | nucleolar and coiled-body phosphoprotein 1                                                                 |
| NM_001002008                                    | <i>Zfp948</i>   | 2.446                        | 0.003603296 | zinc finger protein 948                                                                                    |
| NM_010139                                       | <i>Epha2</i>    | 2.445                        | 0.005758154 | Eph receptor A2                                                                                            |
| NM_010276                                       | <i>Gem</i>      | 2.445                        | 2.39E-04    | GTP binding protein (gene overexpressed in skeletal muscle)                                                |
| NM_021329                                       | <i>Rangrf</i>   | 2.443                        | 0.002084006 | RAN guanine nucleotide release factor                                                                      |
| NM_053247                                       | <i>Lyve1</i>    | 2.439                        | 0.003320745 | lymphatic vessel endothelial hyaluronan receptor 1                                                         |
| NM_010431                                       | <i>Hif1a</i>    | 2.434                        | 5.32E-04    | hypoxia inducible factor 1, alpha subunit                                                                  |
| NM_033398                                       | <i>Jmj6</i>     | 2.431                        | 4.36E-04    | jumonji domain containing 6                                                                                |
| NM_144866                                       | <i>Etf1</i>     | 2.430                        | 2.94E-04    | eukaryotic translation termination factor 1                                                                |
| NM_152817                                       | <i>Ttc27</i>    | 2.425                        | 8.16E-04    | tetratricopeptide repeat domain 27                                                                         |
| NM_173426                                       | <i>Fam110b</i>  | 2.420                        | 0.001575869 | family with sequence similarity 110, member B                                                              |
| NM_009344                                       | <i>Phld1</i>    | 2.419                        | 8.02E-04    | pleckstrin homology-like domain, family A, member 1                                                        |
| NM_001042556//N <i>Rpf2</i>                     |                 | 2.416                        | 1.33E-04    | ribosome production factor 2 homolog (S. cerevisiae)                                                       |
| NM_180678                                       | <i>Gars</i>     | 2.414                        | 1.37E-04    | glycyl-tRNA synthetase                                                                                     |
| NM_009044                                       | <i>Rel</i>      | 2.413                        | 0.001769273 | reticuloendotheliosis oncogene                                                                             |
| NM_175158                                       | <i>Utp20</i>    | 2.412                        | 3.29E-04    | UTP20, small subunit (SSU) processome component, homolog (yeast)                                           |
| NM_009897                                       | <i>Ckmt1</i>    | 2.412                        | 0.002492751 | creatine kinase, mitochondrial 1, ubiquitous                                                               |
| NM_001160012//N <i>Gjb3</i>                     |                 | 2.412                        | 0.003248493 | gap junction protein, beta 3                                                                               |
| NM_177603                                       | <i>Frat2</i>    | 2.410                        | 4.98E-04    | frequently rearranged in advanced T cell lymphomas 2                                                       |
| NM_029993                                       | <i>Mlana</i>    | 2.409                        | 6.27E-04    | melan-A                                                                                                    |
| NM_010324                                       | <i>Got1</i>     | 2.409                        | 0.004969221 | glutamate oxaloacetate transaminase 1, soluble                                                             |
| NM_001190473//N <i>Dapk3</i>                    |                 | 2.408                        | 0.001093517 | death-associated protein kinase 3                                                                          |
| NM_001141922//N <i>Bean1</i>                    |                 | 2.408                        | 0.004566726 | brain expressed, associated with Neddd4, 1                                                                 |
| NM_178798                                       | <i>Slc706</i>   | 2.406                        | 0.001205589 | solute carrier family 7 (cationic amino acid transporter, y+ system), member 6                             |
| NM_023536//XM_ <i>Gm5633//Gm9178//Mrto4</i>     |                 | 2.406                        | 2.29E-04    | predicted gene 5633//predicted gene 9178//MRT4, mRNA turnover 4, homolog (S. cerevisiae)                   |
| NM_011192                                       | <i>Psme3</i>    | 2.404                        | 1.57E-04    | proteasome (prosome, macropain) 28 subunit, 3                                                              |
| NM_010191                                       | <i>Fdft1</i>    | 2.403                        | 0.001553634 | farnesyl diphosphate farnesyl transferase 1                                                                |
| NM_201362                                       | <i>Ccdc68</i>   | 2.402                        | 7.18E-04    | coiled-coil domain containing 68                                                                           |
| NM_023196//NM_ <i>Pla2g12a</i>                  |                 | 2.402                        | 0.001445296 | phospholipase A2, group X1A                                                                                |
| NM_027532                                       | <i>Anapc15</i>  | 2.401                        | 1.87E-04    | anaphase promoting complex C subunit 15                                                                    |
| NM_001164627//N <i>Arhgap8</i>                  |                 | 2.400                        | 0.00177771  | Rho GTPase activating protein 8                                                                            |
| NM_016859                                       | <i>Bysl</i>     | 2.395                        | 2.76E-04    | bystin-like                                                                                                |
| NM_029083                                       | <i>Ddit4</i>    | 2.393                        | 0.001165501 | DNA-damage-inducible transcript 4                                                                          |
| NM_010186                                       | <i>Fcgr1</i>    | 2.391                        | 0.002794191 | Fc receptor, IgG, high affinity I                                                                          |
| NM_010158                                       | <i>Khdrbs3</i>  | 2.389                        | 0.001770565 | KH domain containing, RNA binding, signal transduction associated 3                                        |
| NM_153416                                       | <i>Aaas</i>     | 2.382                        | 6.77E-04    | achalasia, adrenocortical insufficiency, alacrimia                                                         |
| NM_001012396//N <i>Ptpla</i>                    |                 | 2.377                        | 8.66E-04    | protein tyrosine phosphatase-like (proline instead of catalytic arginine), member a                        |
| NM_001039710//N <i>Coq10b</i>                   |                 | 2.376                        | 6.37E-04    | coenzyme Q10 homolog B (S. cerevisiae)                                                                     |
| NM_001161515//N <i>Dctd</i>                     |                 | 2.376                        | 0.003346541 | dCMP deaminase                                                                                             |
| NM_019696                                       | <i>Cpxm1</i>    | 2.371                        | 0.009013065 | carboxypeptidase X 1 (M14 family)                                                                          |
| NM_028307                                       | <i>Tdrkh</i>    | 2.371                        | 8.18E-04    | tudor and KH domain containing protein                                                                     |
| NM_020049                                       | <i>Slc6a14</i>  | 2.370                        | 0.002365604 | solute carrier family 6 (neurotransmitter transporter), member 14                                          |
| NM_011222//NR_C <i>Pvt1</i>                     |                 | 2.370                        | 5.17E-04    | plasmacytoma variant translocation 1                                                                       |
| NM_181470                                       | <i>Ltv1</i>     | 2.369                        | 4.10E-04    | LTV1 homolog (S. cerevisiae)                                                                               |
| NM_027250                                       | <i>Selc1</i>    | 2.369                        | 2.40E-04    | Sel1 repeat containing 1                                                                                   |
| NM_001168250//N <i>Mtbp</i>                     |                 | 2.367                        | 2.39E-04    | Mdm2, transformed 3T3 cell double minute p53 binding protein                                               |
| NM_178891//NR_C <i>Prrt6</i>                    |                 | 2.366                        | 1.29E-04    | protein arginine N-methyltransferase 6                                                                     |
| NM_028749                                       | <i>Npl</i>      | 2.363                        | 0.005317851 | N-acetylneuraminase pyruvate lyase                                                                         |
| NM_027911//NR_C <i>Raver1//Raver1-fdx1//Fdx</i> |                 | 2.363                        | 1.08E-04    | ribonucleoprotein, PTB-binding 1//Raver1-Fdx1 readthrough//ferredoxin 1-like                               |
| NM_013845                                       | <i>Ror1</i>     | 2.358                        | 0.005102613 | receptor tyrosine kinase-like orphan receptor 1                                                            |
| NM_028943                                       | <i>Sgms2</i>    | 2.355                        | 0.001844777 | sphingomyelin synthase 2                                                                                   |
| NM_010880                                       | <i>Ncl</i>      | 2.355                        | 2.30E-04    | nucleolin                                                                                                  |
| NM_008857                                       | <i>Prkci</i>    | 2.352                        | 1.50E-04    | protein kinase C, iota                                                                                     |
| NM_008152                                       | <i>Gpr65</i>    | 2.352                        | 0.001654325 | G-protein coupled receptor 65                                                                              |
| NM_010864                                       | <i>Myo5a</i>    | 2.349                        | 3.22E-04    | myosin VA                                                                                                  |
| NM_001013375                                    | <i>Utp18</i>    | 2.348                        | 2.24E-04    | UTP18, small subunit (SSU) processome component, homolog (yeast)                                           |
| NM_001164735//N <i>Crif2</i>                    |                 | 2.342                        | 4.09E-04    | cytokine receptor-like factor 2                                                                            |
| NM_175016                                       | <i>Alkbh2</i>   | 2.333                        | 0.00158859  | alkB, alkylation repair homolog 2 (E. coli)                                                                |

| RefSeq Transcript ID | Gene Symbol                  | *FC (Air vs O <sub>2</sub> ) | p (Corr)    | Gene Title                                                                                      |
|----------------------|------------------------------|------------------------------|-------------|-------------------------------------------------------------------------------------------------|
| NM_001164370         | <i>Mipol1</i>                | 2.333                        | 6.75E-04    | mirror-image polydactyly gene 1 homolog (human)                                                 |
| NM_026855            | <i>Arv1</i>                  | 2.327                        | 0.001127156 | ARV1 homolog (yeast)                                                                            |
| NM_053080            | <i>Aldh1a3</i>               | 2.327                        | 5.61E-04    | aldehyde dehydrogenase family 1, subfamily A3                                                   |
| NM_008311            | <i>Htr2b</i>                 | 2.326                        | 0.001303626 | 5-hydroxytryptamine (serotonin) receptor 2B                                                     |
| NM_009743            | <i>Bcl2l1</i>                | 2.325                        | 0.001286065 | BCL2-like 1                                                                                     |
| NM_001099217///N     | <i>Ly6c1///Ly6c2</i>         | 2.320                        | 2.76E-04    | lymphocyte antigen 6 complex, locus C1///lymphocyte antigen 6 complex, locus C2                 |
| NM_181848            | <i>Optn</i>                  | 2.319                        | 2.24E-04    | optineurin                                                                                      |
| NM_145354            | <i>Nsun2</i>                 | 2.318                        | 5.47E-04    | NOL1/NOP2/Sun domain family member 2                                                            |
| NM_001033476///X     | <i>Ahnak2///LOC101055828</i> | 2.318                        | 0.003263333 | AHNAK nucleoprotein 2///protein AHNAK2-like                                                     |
| NM_001081224         | <i>Prr16</i>                 | 2.316                        | 0.004164954 | proline rich 16                                                                                 |
| NM_133990            | <i>Il13ra1</i>               | 2.316                        | 0.006537725 | interleukin 13 receptor, alpha 1                                                                |
| NM_133807            | <i>Lrrc59</i>                | 2.313                        | 3.89E-04    | leucine rich repeat containing 59                                                               |
| NR_037996            | <i>Hmga2-ps1</i>             | 2.312                        | 3.51E-04    | high mobility group AT-hook 2, pseudogene 1                                                     |
| NM_010288            | <i>Gja1</i>                  | 2.311                        | 0.001337127 | gap junction protein, alpha 1                                                                   |
| NM_007573            | <i>C1qbp</i>                 | 2.309                        | 2.55E-04    | complement component 1, q subcomponent binding protein                                          |
| NM_028599            | <i>Wdr75</i>                 | 2.306                        | 2.41E-04    | WD repeat domain 75                                                                             |
| NM_177613            | <i>Cdc34</i>                 | 2.300                        | 0.001678436 | cell division cycle 34                                                                          |
| NM_133740            | <i>Prmt3</i>                 | 2.300                        | 1.74E-04    | protein arginine N-methyltransferase 3                                                          |
| NM_027198            | <i>Zswim7</i>                | 2.299                        | 8.94E-04    | zinc finger SWIM-type containing 7                                                              |
| NM_001079847///N     | <i>Gpr64</i>                 | 2.298                        | 0.002377753 | G protein-coupled receptor 64                                                                   |
| NM_025748            | <i>Adat2</i>                 | 2.291                        | 3.71E-04    | adenosine deaminase, tRNA-specific 2                                                            |
| NM_007544            | <i>Bid</i>                   | 2.288                        | 2.76E-04    | BH3 interacting domain death agonist                                                            |
| NM_007737            | <i>Col5a2</i>                | 2.286                        | 3.58E-04    | collagen, type V, alpha 2                                                                       |
| NM_021888            | <i>Qtrt1</i>                 | 2.286                        | 8.11E-04    | queuine tRNA-ribosyltransferase 1                                                               |
| NM_173014            | <i>Lpcat2</i>                | 2.285                        | 2.97E-04    | lysophosphatidylcholine acyltransferase 2                                                       |
| NM_025462///NM       | <i>Ece2</i>                  | 2.285                        | 1.74E-04    | endothelin converting enzyme 2                                                                  |
| NM_133753            | <i>Errf1</i>                 | 2.284                        | 8.14E-04    | ERBB receptor feedback inhibitor 1                                                              |
| NM_001168253///N     | <i>Fam83h</i>                | 2.282                        | 4.86E-04    | family with sequence similarity 83, member H                                                    |
| NM_008704///XM       | <i>Nme1///LOC100047753</i>   | 2.281                        | 1.68E-04    | NME/NM23 nucleoside diphosphate kinase 1///nucleoside diphosphate kinase A-like                 |
| NM_053015            | <i>Mlph</i>                  | 2.280                        | 0.00380293  | melanophilin                                                                                    |
| NM_001252316///N     | <i>Shmt2</i>                 | 2.274                        | 8.16E-04    | serine hydroxymethyltransferase 2 (mitochondrial)                                               |
| NM_001082483         | <i>Efr3b</i>                 | 2.269                        | 3.49E-04    | EFR3 homolog B ( <i>S. cerevisiae</i> )                                                         |
| NM_145585            | <i>Thumpd1</i>               | 2.262                        | 8.03E-04    | THUMP domain containing 1                                                                       |
| NM_021557            | <i>Rdh11</i>                 | 2.257                        | 0.006202221 | retinol dehydrogenase 11                                                                        |
| NM_001252470///N     | <i>Cpt1c</i>                 | 2.257                        | 0.005425115 | carnitine palmitoyltransferase 1c                                                               |
| NM_025824            | <i>Bzw1</i>                  | 2.256                        | 3.65E-04    | basic leucine zipper and W2 domains 1                                                           |
| NM_001177371///N     | <i>Dbn1</i>                  | 2.254                        | 9.52E-04    | drebrin 1                                                                                       |
| NM_009011            | <i>Rad23b</i>                | 2.254                        | 1.68E-04    | RAD23b homolog ( <i>S. cerevisiae</i> )                                                         |
| NM_001100449         | <i>Taf4b</i>                 | 2.254                        | 2.89E-04    | TAF4B RNA polymerase II, TATA box binding protein (TBP)-associated factor                       |
| NM_026453            | <i>Mak16</i>                 | 2.252                        | 1.68E-04    | MAK16 homolog ( <i>S. cerevisiae</i> )                                                          |
| NM_001172146///N     | <i>Aimp2</i>                 | 2.252                        | 5.01E-04    | aminoacyl tRNA synthetase complex-interacting multifunctional protein 2                         |
| NM_019683            | <i>Ankrd49</i>               | 2.250                        | 0.008708203 | ankyrin repeat domain 49                                                                        |
| NM_001113529///N     | <i>Csf1</i>                  | 2.248                        | 7.29E-04    | colony stimulating factor 1 (macrophage)                                                        |
| NM_024193            | <i>Nop56</i>                 | 2.248                        | 2.29E-04    | NOP56 ribonucleoprotein                                                                         |
| NM_181593            | <i>Itpkc</i>                 | 2.247                        | 0.001413234 | inositol 1,4,5-trisphosphate 3-kinase C                                                         |
| NM_008612            | <i>Mnat1</i>                 | 2.247                        | 2.06E-04    | menage a trois 1                                                                                |
| NM_026114            | <i>Eif2s1</i>                | 2.246                        | 1.93E-04    | eukaryotic translation initiation factor 2, subunit 1 alpha                                     |
| NM_008608            | <i>Mmp14</i>                 | 2.242                        | 0.001506803 | matrix metalloproteinase 14 (membrane-inserted)                                                 |
| NM_145822            | <i>Cd3eap</i>                | 2.242                        | 3.82E-04    | CD3E antigen, epsilon polypeptide associated protein                                            |
| NM_001005767         | <i>Parl</i>                  | 2.242                        | 3.34E-04    | presenilin associated, rhomboid-like                                                            |
| NM_138747            | <i>Nop2</i>                  | 2.241                        | 0.001083616 | NOP2 nucleolar protein                                                                          |
| NM_027106            | <i>Avp11</i>                 | 2.241                        | 4.43E-04    | arginine vasopressin-induced 1                                                                  |
| NM_001111051///N     | <i>Dclk1</i>                 | 2.241                        | 8.60E-04    | doublecortin-like kinase 1                                                                      |
| NM_025599///NM       | <i>Cms5///Pgap2</i>          | 2.241                        | 4.83E-04    | cms small ribosomal subunit 1///post-GPI attachment to proteins 2                               |
| NM_001146708///N     | <i>Fas</i>                   | 2.238                        | 0.003935241 | Fas (TNF receptor superfamily member 6)                                                         |
| NM_130881///NM       | <i>Pabpc4</i>                | 2.237                        | 5.71E-04    | poly(A) binding protein, cytoplasmic 4                                                          |
| NM_025281            | <i>Lyar</i>                  | 2.234                        | 3.33E-04    | Ly1 antibody reactive clone                                                                     |
| NM_001001981///N     | <i>Utp14b</i>                | 2.230                        | 0.004545432 | UTP14, U3 small nucleolar ribonucleoprotein, homolog B (yeast)                                  |
| NM_025531            | <i>Slmo2</i>                 | 2.230                        | 6.75E-04    | slowmo homolog 2 ( <i>Drosophila</i> )                                                          |
| NM_022889            | <i>Pes1</i>                  | 2.230                        | 2.16E-04    | pescadillo homolog 1, containing BRCT domain ( <i>zebrafish</i> )                               |
| NM_026792            | <i>Agpat5</i>                | 2.229                        | 1.76E-04    | 1-acylglycerol-3-phosphate O-acyltransferase 5 (lysophosphatidic acid acyltransferase, epsilon) |
| NM_001164561///N     | <i>Exosc1</i>                | 2.229                        | 0.00705132  | exosome component 1                                                                             |
| NM_011604            | <i>Tlr6</i>                  | 2.228                        | 0.00230658  | toll-like receptor 6                                                                            |
| NM_001160149///N     | <i>Cgref1</i>                | 2.227                        | 0.004690172 | cell growth regulator with EF hand domain 1                                                     |
| NM_146247            | <i>Mettl22</i>               | 2.226                        | 5.24E-04    | methyltransferase like 22                                                                       |
| NM_001159375///N     | <i>Ejf4a1</i>                | 2.226                        | 6.02E-04    | eukaryotic translation initiation factor 4A1                                                    |
| NM_028453            | <i>Otud3</i>                 | 2.224                        | 2.31E-04    | OTU domain containing 3                                                                         |
| NM_008723///NR       | <i>C Npm3///Npm3-ps1</i>     | 2.223                        | 0.001561041 | nucleoplasmin 3///nucleoplasmin 3, pseudogene 1                                                 |
| NM_001113553///N     | <i>Irak2</i>                 | 2.223                        | 0.001481983 | interleukin-1 receptor-associated kinase 2                                                      |
| NM_016847            | <i>Avpr1a</i>                | 2.223                        | 0.003876133 | arginine vasopressin receptor 1A                                                                |
| NM_013872            | <i>Pmm1</i>                  | 2.222                        | 0.008187106 | phosphomannomutase 1                                                                            |
| NM_001008421         | <i>Nol10</i>                 | 2.220                        | 2.39E-04    | nucleolar protein 10                                                                            |
| NM_001163481///N     | <i>Fkbp10</i>                | 2.217                        | 0.00232895  | FK506 binding protein 10                                                                        |
| NM_028276            | <i>Utp14a</i>                | 2.216                        | 4.24E-04    | UTP14, U3 small nucleolar ribonucleoprotein, homolog A (yeast)                                  |
| NM_007918            | <i>Eif4ebp1</i>              | 2.211                        | 2.76E-04    | eukaryotic translation initiation factor 4E binding protein 1                                   |
| NM_173376            | <i>Rbmx2</i>                 | 2.208                        | 2.24E-04    | RNA binding motif protein, X-linked 2                                                           |
| NM_001146211///N     | <i>Mrps10</i>                | 2.207                        | 3.71E-04    | mitochondrial ribosomal protein S10                                                             |
| NM_001004150///N     | <i>A4galt</i>                | 2.206                        | 8.60E-04    | alpha 1,4-galactosyltransferase                                                                 |
| NM_001039934///N     | <i>A730034C02///Map2</i>     | 2.203                        | 4.16E-04    | uncharacterized protein A730034C02///microtubule-associated protein 2                           |
| NM_001033306         | <i>Shb</i>                   | 2.198                        | 0.001163322 | src homology 2 domain-containing transforming protein B                                         |
| NM_138599            | <i>Tom70a</i>                | 2.197                        | 3.71E-04    | translocase of outer mitochondrial membrane 70 homolog A (yeast)                                |
| NM_001252476///N     | <i>Prmt1</i>                 | 2.196                        | 2.39E-04    | protein arginine N-methyltransferase 1                                                          |
| NM_010217            | <i>Ctgf</i>                  | 2.196                        | 2.84E-04    | connective tissue growth factor                                                                 |

| RefSeq Transcript                             | IC Gene Symbol  | *FC (Air vs O <sub>2</sub> ) | p (Corr)    | Gene Title                                                                                    |
|-----------------------------------------------|-----------------|------------------------------|-------------|-----------------------------------------------------------------------------------------------|
| NM_144886                                     | <b>Exosc2</b>   | 2.196                        | 2.89E-04    | exosome component 2                                                                           |
| NM_053191                                     | <b>Pi15</b>     | 2.194                        | 0.006341125 | peptidase inhibitor 15                                                                        |
| NM_025475                                     | <b>Haus2</b>    | 2.188                        | 0.004225463 | HAUS augmin-like complex, subunit 2                                                           |
| NM_029891                                     | <b>Nkrf</b>     | 2.188                        | 3.49E-04    | NF-kappaB repressing factor                                                                   |
| NM_170592                                     | <b>Ntm1</b>     | 2.188                        | 4.30E-04    | N-terminal Xaa-Pro-Lys N-methyltransferase 1                                                  |
| NM_026152                                     | <b>Hoga1</b>    | 2.187                        | 9.31E-04    | 4-hydroxy-2-oxoglutarate aldolase 1                                                           |
| NM_178069                                     | <b>Lsg1</b>     | 2.186                        | 6.03E-04    | large subunit GTPase 1 homolog (S. cerevisiae)                                                |
| NM_001081094                                  | <b>Znhit6</b>   | 2.186                        | 3.07E-04    | zinc finger, HIT type 6                                                                       |
| NM_008380                                     | <b>Inhba</b>    | 2.185                        | 8.04E-04    | inhibin beta-A                                                                                |
| NM_001177794///N Sertad4                      |                 | 2.184                        | 0.003525739 | SERTA domain containing 4                                                                     |
| NM_026742                                     | <b>Ndujaf4</b>  | 2.183                        | 2.41E-04    | NADH dehydrogenase (ubiquinone) 1 alpha subcomplex, assembly factor 4                         |
| NM_001199271///N Slc19a1                      |                 | 2.182                        | 0.002086022 | solute carrier family 19 (folate transporter), member 1                                       |
| NM_026040///XM_1 Srfbp1                       |                 | 2.181                        | 2.80E-04    | serum response factor binding protein 1                                                       |
| NM_145154                                     | <b>Angptl6</b>  | 2.177                        | 0.008775103 | angiopoietin-like 6                                                                           |
| NM_001277875///N Tpm2                         |                 | 2.176                        | 0.004191475 | tropomyosin 2, beta                                                                           |
| NM_011561///NM_1 Tdg                          |                 | 2.176                        | 1.58E-04    | thymine DNA glycosylase pseudogene                                                            |
| NM_030704                                     | <b>Hspb8</b>    | 2.174                        | 7.47E-04    | heat shock protein 8                                                                          |
| NM_009554                                     | <b>Zfp37</b>    | 2.174                        | 0.006180156 | zinc finger protein 37                                                                        |
| NM_019428                                     | <b>Rpp30</b>    | 2.171                        | 4.09E-04    | ribonuclease P/MRP 30 subunit                                                                 |
| NM_008359                                     | <b>Il17ra</b>   | 2.170                        | 0.002864797 | interleukin 17 receptor A                                                                     |
| NM_175507                                     | <b>Slc35g1</b>  | 2.170                        | 8.41E-04    | solute carrier family 35, member G1                                                           |
| NM_026247///NR_1 C Alg13                      |                 | 2.168                        | 0.00123716  | asparagine-linked glycosylation 13                                                            |
| NM_028261                                     | <b>Tmem173</b>  | 2.168                        | 3.31E-04    | transmembrane protein 173                                                                     |
| NM_027652                                     | <b>Ept1</b>     | 2.167                        | 1.70E-04    | ethanolaminephosphotransferase 1 (CDP-ethanolamine-specific)                                  |
| NM_001166409///N Gm15453///Rbm3               |                 | 2.167                        | 6.90E-04    | predicted gene 15453//RNA binding motif protein 3                                             |
| NR_030708///NM_1 C 6820431F20Rik///2610005L07 |                 | 2.167                        | 0.001912931 | cadherin 11 pseudogene                                                                        |
| NM_001163511///N Spata5                       |                 | 2.167                        | 3.17E-04    | spermatogenesis associated 5                                                                  |
| NM_001081047                                  | <b>Cnksr1</b>   | 2.167                        | 6.83E-04    | connector enhancer of kinase suppressor of Ras 1                                              |
| NM_009453///NM_1 Zrsr2                        |                 | 2.165                        | 0.001769273 | zinc finger (CCCH type), RNA binding motif and serine/arginine rich 2                         |
| NM_029278                                     | <b>Nop14</b>    | 2.165                        | 0.001321322 | NOP14 nucleolar protein                                                                       |
| NM_001163476///N Gins1                        |                 | 2.165                        | 0.002920305 | GINS complex subunit 1 (Psf1 homolog)                                                         |
| NM_001025444///N Aptx                         |                 | 2.163                        | 0.001830343 | aprataxin                                                                                     |
| NM_001033194                                  | <b>Gtf3c3</b>   | 2.162                        | 8.54E-04    | general transcription factor IIIC, polypeptide 3                                              |
| NM_170758                                     | <b>Cd300a</b>   | 2.160                        | 0.002323181 | CD300A antigen                                                                                |
| NM_153143                                     | <b>Kctd11</b>   | 2.159                        | 5.00E-04    | potassium channel tetramerisation domain containing 11                                        |
| NM_028108                                     | <b>Naa50</b>    | 2.158                        | 7.12E-04    | N(alpha)-acetyltransferase 50, NatE catalytic subunit                                         |
| NM_181590                                     | <b>Shq1</b>     | 2.157                        | 7.02E-04    | SHQ1 homolog (S. cerevisiae)                                                                  |
| NM_001272041///N Acta1                        |                 | 2.153                        | 9.00E-04    | actin, alpha 1, skeletal muscle                                                               |
| NM_008655                                     | <b>Gadd45b</b>  | 2.151                        | 0.004444553 | growth arrest and DNA-damage-inducible 45 beta                                                |
| NM_053085                                     | <b>Tcf23</b>    | 2.149                        | 0.003876133 | transcription factor 23                                                                       |
| NM_172437                                     | <b>Pus7l</b>    | 2.148                        | 9.62E-04    | pseudouridylyl synthase 7 homolog (S. cerevisiae)-like                                        |
| NM_144549                                     | <b>Trib1</b>    | 2.146                        | 5.74E-04    | tribbles homolog 1 (Drosophila)                                                               |
| NM_001252593///N Cars                         |                 | 2.145                        | 5.98E-04    | cysteinyl-tRNA synthetase                                                                     |
| NM_001163847///N Tbc1d24                      |                 | 2.143                        | 0.004920226 | TBC1 domain family, member 24                                                                 |
| NM_001162924///N Pkp3                         |                 | 2.142                        | 2.76E-04    | plakophilin 3                                                                                 |
| NM_010807                                     | <b>Marcks1</b>  | 2.142                        | 8.04E-04    | MARCKS-like 1                                                                                 |
| NM_001146012                                  | <b>R3hcc1</b>   | 2.141                        | 8.86E-04    | R3H domain and coiled-coil containing 1                                                       |
| NM_144907                                     | <b>Sesn2</b>    | 2.140                        | 0.002740392 | sestrin 2                                                                                     |
| NM_009687                                     | <b>Apex1</b>    | 2.138                        | 2.42E-04    | apurinic/apyrimidinic endonuclease 1                                                          |
| NM_026932                                     | <b>Ebna1bp2</b> | 2.137                        | 3.72E-04    | EBNA1 binding protein 2                                                                       |
| NM_001164201                                  | <b>Cers3</b>    | 2.137                        | 0.003887256 | ceramide synthase 3                                                                           |
| NM_007553                                     | <b>Bmp2</b>     | 2.136                        | 0.001321322 | bone morphogenetic protein 2                                                                  |
| NM_018736                                     | <b>Mre11a</b>   | 2.134                        | 2.81E-04    | meiotic recombination 11 homolog A (S. cerevisiae)                                            |
| NM_021303                                     | <b>Noc2l</b>    | 2.131                        | 4.44E-04    | nucleolar complex associated 2 homolog (S. cerevisiae)                                        |
| NM_001166376///N Ms406c                       |                 | 2.130                        | 0.00733393  | membrane-spanning 4-domains, subfamily A, member 6C                                           |
| NM_025716                                     | <b>Spryd4</b>   | 2.128                        | 6.20E-04    | SPRY domain containing 4                                                                      |
| NM_001277305///N Adamts2                      |                 | 2.128                        | 0.001334864 | a disintegrin-like and metallopeptidase (reprolysin type) with thrombospondin type 1 motif, 2 |
| NM_020493                                     | <b>Srf</b>      | 2.127                        | 6.29E-04    | serum response factor                                                                         |
| NM_001190717///N Dbf4                         |                 | 2.126                        | 0.001491779 | DBF4 homolog (S. cerevisiae)                                                                  |
| NM_007413                                     | <b>Adora2b</b>  | 2.124                        | 0.005008493 | adenosine A2b receptor                                                                        |
| NM_001001297///N Thns1                        |                 | 2.121                        | 0.003039222 | threonine synthase-like 1 (bacterial)                                                         |
| NM_028870                                     | <b>Citb</b>     | 2.120                        | 3.58E-04    | clathrin, light polypeptide (Lcb)                                                             |
| NM_025779                                     | <b>Ccdc109b</b> | 2.120                        | 0.002864969 | coiled-coil domain containing 109B                                                            |
| NM_028228                                     | <b>Pinx1</b>    | 2.119                        | 4.75E-04    | PIN2/TERF1 interacting, telomerase inhibitor 1                                                |
| NM_172704                                     | <b>Dnajc11</b>  | 2.119                        | 2.17E-04    | Dnaj (Hsp40) homolog, subfamily C, member 11                                                  |
| NM_001042513///N Txnrd1                       |                 | 2.117                        | 8.23E-04    | thioredoxin reductase 1                                                                       |
| NM_009298                                     | <b>Surf6</b>    | 2.116                        | 2.76E-04    | surfeit gene 6                                                                                |
| NM_021336                                     | <b>Snrpa1</b>   | 2.116                        | 2.53E-04    | small nuclear ribonucleoprotein polypeptide A'                                                |
| NM_001127177///N Ptpn2                        |                 | 2.116                        | 8.96E-04    | protein tyrosine phosphatase, non-receptor type 2                                             |
| NM_145939                                     | <b>Alg3</b>     | 2.115                        | 0.001960379 | asparagine-linked glycosylation 3 (alpha-1,3-mannosyltransferase)                             |
| NM_023048                                     | <b>Asb4</b>     | 2.114                        | 0.001480785 | ankyrin repeat and SOCS box-containing 4                                                      |
| NM_026277                                     | <b>Nob1</b>     | 2.113                        | 9.38E-04    | NIN1/RPN12 binding protein 1 homolog (S. cerevisiae)                                          |
| NM_170593                                     | <b>Disp2</b>    | 2.112                        | 0.00517247  | dispatched homolog 2 (Drosophila)                                                             |
| NM_175112                                     | <b>Rae1</b>     | 2.111                        | 0.001338532 | RAE1 RNA export 1 homolog (S. pombe)                                                          |
| NM_011639                                     | <b>Trip6</b>    | 2.111                        | 0.001376601 | thyroid hormone receptor interactor 6                                                         |
| NM_013745                                     | <b>Nufip1</b>   | 2.109                        | 4.03E-04    | nuclear fragile X mental retardation protein interacting protein 1                            |
| NM_025782///NM_1 Ttc39b                       |                 | 2.108                        | 0.001636828 | tetratricopeptide repeat domain 39B                                                           |
| NM_011133                                     | <b>Pole2</b>    | 2.106                        | 0.001937505 | polymerase (DNA directed), epsilon 2 (p59 subunit)                                            |
| NM_001161844///N Cblc                         |                 | 2.105                        | 0.001945286 | Casitas B-lineage lymphoma c                                                                  |
| NM_026856///XM_1 Gm8350///Zfp644              |                 | 2.104                        | 8.84E-04    | predicted gene 8350//zinc finger protein 644                                                  |
| NM_134133                                     | <b>Smim3</b>    | 2.100                        | 0.002343752 | small integral membrane protein 3                                                             |
| NM_133800                                     | <b>Nol12</b>    | 2.098                        | 6.96E-04    | nucleolar protein 12                                                                          |
| NM_001038607///N Kcnh1                        |                 | 2.096                        | 1.96E-04    | potassium voltage-gated channel, subfamily H (eag-related), member 1                          |



| RefSeq Transcript ID | Gene Symbol         | *FC (Air vs O <sub>2</sub> ) | p (Corr)    | Gene Title                                                                                 |
|----------------------|---------------------|------------------------------|-------------|--------------------------------------------------------------------------------------------|
| NM_008466            | <b>Kpna3</b>        | <b>2.094</b>                 | 6.20E-04    | karyopherin (importin) alpha 3                                                             |
| NM_025772            | <b>Dtnbp1</b>       | <b>2.093</b>                 | 8.87E-04    | dystrobrevin binding protein 1                                                             |
| NM_025846            | <b>Rras2</b>        | <b>2.093</b>                 | 6.21E-04    | related RAS viral (r-ras) oncogene homolog 2                                               |
| NM_021315            | <b>Noc3l</b>        | <b>2.092</b>                 | 4.78E-04    | nucleolar complex associated 3 homolog (S. cerevisiae)                                     |
| NM_009163            | <b>Sgpl1</b>        | <b>2.090</b>                 | 6.04E-04    | sphingosine phosphate lyase 1                                                              |
| NM_178918            | <b>Utp15</b>        | <b>2.087</b>                 | 2.24E-04    | UTP15, U3 small nucleolar ribonucleoprotein, homolog (yeast)                               |
| NM_026396            | <b>Brix1</b>        | <b>2.085</b>                 | 2.94E-04    | BRX1, biogenesis of ribosomes, homolog (S. cerevisiae)                                     |
| NM_016767            | <b>Batf</b>         | <b>2.082</b>                 | 3.69E-04    | basic leucine zipper transcription factor, ATF-like                                        |
| NM_013768            | <b>Prmt5</b>        | <b>2.081</b>                 | 0.001264891 | protein arginine N-methyltransferase 5                                                     |
| NM_001190461         | <b>Hilpda</b>       | <b>2.081</b>                 | 0.001174438 | hypoxia inducible lipid droplet associated                                                 |
| NM_026195            | <b>Atic</b>         | <b>2.080</b>                 | 0.001822205 | 5-aminoimidazole-4-carboxamide ribonucleotide formyltransferase/IMP cyclohydrolase         |
| NM_145508            | <b>Dyrk3</b>        | <b>2.080</b>                 | 0.001010932 | dual-specificity tyrosine-(Y)-phosphorylation regulated kinase 3                           |
| NM_173363            | <b>Ejf5</b>         | <b>2.077</b>                 | 5.11E-04    | eukaryotic translation initiation factor 5/eukaryotic translation initiation factor 5-like |
| NM_025546            | <b>Rsl1d1</b>       | <b>2.075</b>                 | 0.002871729 | ribosomal L1 domain containing 1                                                           |
| NM_001025388         | <b>Eno1</b>         | <b>2.075</b>                 | 2.80E-04    | enolase 1, alpha non-neuron/predicted gene 5506/alpha-enolase-like                         |
| NM_203319            | <b>Dhx37</b>        | <b>2.075</b>                 | 0.002404555 | DEAH (Asp-Glu-Ala-His) box polypeptide 37                                                  |
| NM_172480            | <b>Mtrr</b>         | <b>2.075</b>                 | 4.05E-04    | 5-methyltetrahydrofolate-homocysteine methyltransferase reductase                          |
| NM_148933            | <b>Slco4a1</b>      | <b>2.074</b>                 | 8.71E-04    | solute carrier organic anion transporter family, member 4a1                                |
| NM_027204            | <b>Mrp12</b>        | <b>2.072</b>                 | 5.97E-04    | mitochondrial ribosomal protein L12                                                        |
| NM_009836            | <b>Cct3</b>         | <b>2.070</b>                 | 3.77E-04    | chaperonin containing Tcp1, subunit 3 (gamma)                                              |
| NM_178668            | <b>Pde12</b>        | <b>2.069</b>                 | 2.39E-04    | phosphodiesterase 12                                                                       |
| NM_009086            | <b>Polr1b</b>       | <b>2.069</b>                 | 2.38E-04    | polymerase (RNA) I polypeptide B                                                           |
| NM_026344            | <b>Dph2</b>         | <b>2.068</b>                 | 0.001990845 | DPH2 homolog (S. cerevisiae)                                                               |
| NM_026660            | <b>Mfsd10</b>       | <b>2.067</b>                 | 9.11E-04    | major facilitator superfamily domain containing 10                                         |
| NM_028850            | <b>Chic2</b>        | <b>2.065</b>                 | 8.05E-04    | cysteine-rich hydrophobic domain 2/RIKEN cDNA B930098A02 gene                              |
| NM_028341            | <b>Ttc39c</b>       | <b>2.065</b>                 | 4.26E-04    | tetratricopeptide repeat domain 39C                                                        |
| NM_021322            | <b>Wdr4</b>         | <b>2.064</b>                 | 7.15E-04    | WD repeat domain 4                                                                         |
| NM_033572            | <b>Wbscr16</b>      | <b>2.063</b>                 | 6.71E-04    | Williams-Beuren syndrome chromosome region 16 homolog (human)                              |
| NM_028444            | <b>Prkcdbp</b>      | <b>2.063</b>                 | 0.002271578 | protein kinase C, delta binding protein                                                    |
| NM_013692            | <b>Klf10</b>        | <b>2.063</b>                 | 0.001216768 | Kruppel-like factor 10                                                                     |
| NM_145480            | <b>Rfc4</b>         | <b>2.062</b>                 | 0.001859592 | replication factor C (activator 1) 4                                                       |
| NM_001025388         | <b>Eno1</b>         | <b>2.061</b>                 | 3.89E-04    | enolase 1, alpha non-neuron/predicted gene 5506/alpha-enolase-like                         |
| NM_146215            | <b>Ftsj1</b>        | <b>2.060</b>                 | 0.001356925 | FtsJ methyltransferase domain containing 1                                                 |
| NM_029092            | <b>Trmt10c</b>      | <b>2.060</b>                 | 0.002257306 | tRNA methyltransferase 10C                                                                 |
| NM_053074            | <b>Nup62</b>        | <b>2.060</b>                 | 3.51E-04    | nucleoporin 62                                                                             |
| NM_001190786         | <b>Ddx19b</b>       | <b>2.059</b>                 | 2.83E-04    | DEAD (Asp-Glu-Ala-Asp) box polypeptide 19b/DEAD (Asp-Glu-Ala-Asp) box polypeptide 19a      |
| NM_183358            | <b>Gadd45gip1</b>   | <b>2.058</b>                 | 0.001990845 | growth arrest and DNA-damage-inducible, gamma interacting protein 1                        |
| NR_030711            | <b>Mir22hg</b>      | <b>2.050</b>                 | 0.006537725 | Mir22 host gene (non-protein coding)                                                       |
| NM_008255            | <b>Hmgcr</b>        | <b>2.049</b>                 | 5.47E-04    | 3-hydroxy-3-methylglutaryl-Coenzyme A reductase                                            |
| NM_024250            | <b>L0C106740</b>    | <b>2.048</b>                 | 0.001918135 | uncharacterized LOC106740/PHD finger protein 10                                            |
| NM_021297            | <b>Tlr4</b>         | <b>2.047</b>                 | 0.001200894 | toll-like receptor 4                                                                       |
| NM_030250            | <b>Nus1</b>         | <b>2.044</b>                 | 0.001378578 | nuclear undecaprenyl pyrophosphate synthase 1 homolog (S. cerevisiae)                      |
| NM_153126            | <b>Nat10</b>        | <b>2.044</b>                 | 2.39E-04    | N-acetyltransferase 10                                                                     |
| NM_009698            | <b>Aprt</b>         | <b>2.044</b>                 | 0.001085979 | adenine phosphoribosyl transferase                                                         |
| NM_001104529         | <b>Gpr35</b>        | <b>2.042</b>                 | 0.00448045  | G protein-coupled receptor 35                                                              |
| NM_026637            | <b>Ggct</b>         | <b>2.042</b>                 | 0.001043494 | gamma-glutamyl cyclotransferase                                                            |
| NM_133757            | <b>Pgs1</b>         | <b>2.039</b>                 | 6.77E-04    | phosphatidylglycerophosphate synthase 1                                                    |
| NM_011499            | <b>Strap</b>        | <b>2.038</b>                 | 4.41E-04    | serine/threonine kinase receptor associated protein                                        |
| NM_008044            | <b>Fxn</b>          | <b>2.038</b>                 | 0.001191939 | frataxin                                                                                   |
| NM_028607            | <b>Bloc1s2</b>      | <b>2.038</b>                 | 0.001832486 | biogenesis of lysosome-related organelles complex-1, subunit 2                             |
| NM_030720            | <b>Gpr84</b>        | <b>2.037</b>                 | 0.006206421 | G protein-coupled receptor 84                                                              |
| NM_001025570         | <b>Prrx1</b>        | <b>2.033</b>                 | 0.002088393 | paired related homeobox 1                                                                  |
| NM_173363            | <b>Ejf5</b>         | <b>2.032</b>                 | 6.46E-04    | eukaryotic translation initiation factor 5/eukaryotic translation initiation factor 5-like |
| NM_001081682         | <b>Gnb1l</b>        | <b>2.032</b>                 | 0.002255388 | guanine nucleotide binding protein (G protein), beta polypeptide 1-like                    |
| NM_028115            | <b>Trub1</b>        | <b>2.031</b>                 | 6.64E-04    | TruB pseudouridine (psi) synthase homolog 1 (E. coli)                                      |
| NM_009883            | <b>Cebpb</b>        | <b>2.031</b>                 | 4.40E-04    | CCAAT/enhancer binding protein (C/EBP), beta                                               |
| NM_054056            | <b>Pawr</b>         | <b>2.030</b>                 | 2.69E-04    | PRKC, apoptosis, WT1, regulator                                                            |
| NM_033373            | <b>Krt23</b>        | <b>2.029</b>                 | 5.32E-04    | keratin 23                                                                                 |
| NM_007961            | <b>Etv6</b>         | <b>2.029</b>                 | 0.001988984 | ets variant gene 6 (TEL oncogene)                                                          |
| NM_011590            | <b>Timm17a</b>      | <b>2.028</b>                 | 4.39E-04    | translocase of inner mitochondrial membrane 17a                                            |
| NM_023876            | <b>Elp4</b>         | <b>2.027</b>                 | 7.19E-04    | elongation protein 4 homolog (S. cerevisiae)                                               |
| NM_028355            | <b>Tmem48</b>       | <b>2.027</b>                 | 3.10E-04    | transmembrane protein 48                                                                   |
| NM_028292            | <b>Ppme1</b>        | <b>2.027</b>                 | 9.62E-04    | protein phosphatase methylesterase 1                                                       |
| NM_026538            | <b>Ddx56</b>        | <b>2.025</b>                 | 4.42E-04    | DEAD (Asp-Glu-Ala-Asp) box polypeptide 56                                                  |
| NM_026295            | <b>Ctdp1</b>        | <b>2.025</b>                 | 8.96E-04    | CTD (carboxy-terminal domain, RNA polymerase II, polypeptide A) phosphatase, subunit 1     |
| NM_009423            | <b>Traf4</b>        | <b>2.023</b>                 | 0.006347864 | TNF receptor associated factor 4                                                           |
| NM_009391            | <b>L0C100045999</b> | <b>2.023</b>                 | 2.76E-04    | GTP-binding nuclear protein Ran-like/RAN, member RAS oncogene family                       |
| NM_025436            | <b>Sc4mol</b>       | <b>2.022</b>                 | 0.001723029 | sterol-C4-methyl oxidase-like                                                              |
| NM_028234            | <b>Rbm33</b>        | <b>2.022</b>                 | 0.00600567  | RNA binding motif protein 33                                                               |
| NM_001177776         | <b>Ahi1</b>         | <b>2.022</b>                 | 9.22E-04    | Abelson helper integration site 1                                                          |
| NM_053169            | <b>Trim16</b>       | <b>2.020</b>                 | 0.001264761 | tripartite motif-containing 16                                                             |
| NM_016966            | <b>Gm6756</b>       | <b>2.019</b>                 | 0.007138217 | 3-phosphoglycerate dehydrogenase pseudogene/3-phosphoglycerate dehydrogenase               |
| NM_198246            | <b>Yars2</b>        | <b>2.018</b>                 | 6.74E-04    | tyrosyl-tRNA synthetase 2 (mitochondrial)                                                  |
| NM_018757            | <b>Nme6</b>         | <b>2.017</b>                 | 0.006537725 | NME/NM23 nucleoside diphosphate kinase 6                                                   |
| NM_025927            | <b>Mrpl45</b>       | <b>2.017</b>                 | 0.003269561 | mitochondrial ribosomal protein L45                                                        |
| NM_001083341         | <b>Mboat2</b>       | <b>2.016</b>                 | 5.51E-04    | membrane bound O-acyltransferase domain containing 2                                       |
| NM_146217            | <b>Aars</b>         | <b>2.016</b>                 | 0.001055065 | alanyl-tRNA synthetase/exosome component 6                                                 |
| NM_011486            | <b>Stat3</b>        | <b>2.016</b>                 | 0.001055065 | signal transducer and activator of transcription 3                                         |
| NM_173757            | <b>Mrps27</b>       | <b>2.016</b>                 | 0.002324157 | mitochondrial ribosomal protein S27                                                        |
| NM_001253883         | <b>Pkm</b>          | <b>2.016</b>                 | 0.002575949 | pyruvate kinase, muscle                                                                    |
| NM_026603            | <b>Denr</b>         | <b>2.014</b>                 | 3.28E-04    | density-regulated protein                                                                  |
| NM_023203            | <b>Dctpp1</b>       | <b>2.014</b>                 | 8.03E-04    | dCTP pyrophosphatase 1                                                                     |
| NM_025635            | <b>Zwint</b>        | <b>2.012</b>                 | 0.002685749 | ZW10 interactor                                                                            |

| RefSeq Transcript ID | Gene Symbol           | *FC (Air vs O <sub>2</sub> ) | p (Corr)    | Gene Title                                                                                                |
|----------------------|-----------------------|------------------------------|-------------|-----------------------------------------------------------------------------------------------------------|
| NM_008909            | <i>Ppl</i>            | 2.012                        | 0.002519995 | periplakin                                                                                                |
| NM_013678            | <i>Surf2</i>          | 2.012                        | 2.82E-04    | surfeit gene 2                                                                                            |
| NM_144835            | <i>Heatr1</i>         | 2.011                        | 7.80E-04    | HEAT repeat containing 1                                                                                  |
| NM_030713            | <i>Zfp202</i>         | 2.011                        | 0.001165849 | zinc finger protein 202                                                                                   |
| NM_001130456///N     | <i>Sema6b</i>         | 2.011                        | 0.001931946 | sema domain, transmembrane domain (TM), and cytoplasmic domain, (semaphorin) 6B                           |
| NM_011239            | <i>Ranbp1</i>         | 2.010                        | 0.001513254 | RAN binding protein 1                                                                                     |
| NM_028572            | <i>Vgll3</i>          | 2.010                        | 0.009275182 | vestigial like 3 (Drosophila)                                                                             |
| NM_134188///NM_      | <i>Acot2///Acot1</i>  | 2.009                        | 0.007231838 | acyl-CoA thioesterase 2///acyl-CoA thioesterase 1                                                         |
| NM_024199            | <i>Cstf1</i>          | 2.009                        | 3.17E-04    | cleavage stimulation factor, 3' pre-RNA, subunit 1                                                        |
| NM_008729            | <i>Ctnd2</i>          | 2.005                        | 8.93E-04    | catenin (cadherin associated protein), delta 2                                                            |
| NM_001144855         | <i>Ppfa4</i>          | 2.005                        | 0.002456469 | protein tyrosine phosphatase, receptor type, f polypeptide (PTPRF), interacting protein (liprin), alpha 4 |
| NM_001159748///N     | <i>Serpnb8</i>        | 2.005                        | 0.0013881   | serine (or cysteine) peptidase inhibitor, clade B, member 8                                               |
| NM_172541            | <i>Tmem120a</i>       | 2.005                        | 0.007270044 | transmembrane protein 120A                                                                                |
| NM_010579            | <i>Ejfb</i>           | 2.004                        | 3.19E-04    | eukaryotic translation initiation factor 6                                                                |
| NM_019715            | <i>Kcmf1</i>          | 2.004                        | 5.14E-04    | potassium channel modulatory factor 1                                                                     |
| NM_025317            | <i>Mrpl54</i>         | 2.003                        | 7.53E-04    | mitochondrial ribosomal protein L54                                                                       |
| NM_145575            | <i>Cald1</i>          | 2.002                        | 2.82E-04    | caldesmon 1                                                                                               |
| NM_007617            | <i>Cav3</i>           | 2.002                        | 0.004482651 | caveolin 3                                                                                                |
| NM_025942///NM_      | <i>Ola1</i>           | 2.001                        | 6.70E-04    | Obg-like ATPase 1                                                                                         |
| NM_011119            | <i>Pa2g4</i>          | 2.000                        | 6.80E-04    | proliferation-associated 2G4                                                                              |
| NM_026851            | <i>Mrpl52</i>         | 2.000                        | 4.10E-04    | mitochondrial ribosomal protein L52                                                                       |
| NM_001010836         | <i>Ppp1r13l</i>       | 1.998                        | 4.98E-04    | protein phosphatase 1, regulatory (inhibitor) subunit 13 like                                             |
| NM_001013365         | <i>Osm</i>            | 1.998                        | 0.004345239 | oncostatin M                                                                                              |
| NM_001243748///N     | <i>Rassf1</i>         | 1.998                        | 9.19E-04    | Ras association (RalGDS/AF-6) domain family member 1                                                      |
| NM_028679            | <i>Irak3</i>          | 1.994                        | 0.001450804 | interleukin-1 receptor-associated kinase 3                                                                |
| NM_010851            | <i>Myd88</i>          | 1.994                        | 0.001960379 | myeloid differentiation primary response gene 88                                                          |
| NM_176933            | <i>Dusp4</i>          | 1.991                        | 9.36E-04    | dual specificity phosphatase 4                                                                            |
| NM_145144            | <i>Aif1</i>           | 1.991                        | 0.003178401 | allograft inflammatory factor 1-like                                                                      |
| NM_008186            | <i>Gtf2h1</i>         | 1.990                        | 7.13E-04    | general transcription factor II H, polypeptide 1                                                          |
| NM_011278            | <i>Rnf4</i>           | 1.989                        | 5.39E-04    | ring finger protein 4                                                                                     |
| NM_007609            | <i>Casp4</i>          | 1.989                        | 0.00201471  | caspase 4, apoptosis-related cysteine peptidase                                                           |
| NM_011193            | <i>Pstpip1</i>        | 1.987                        | 0.004871914 | proline-serine-threonine phosphatase-interacting protein 1                                                |
| NM_198620            | <i>Rundc3b</i>        | 1.984                        | 0.003979686 | RUN domain containing 3B                                                                                  |
| NM_025485            | <i>Mrps22</i>         | 1.982                        | 6.72E-04    | mitochondrial ribosomal protein S22                                                                       |
| NM_030116            | <i>Mrpl9</i>          | 1.981                        | 0.001655251 | mitochondrial ribosomal protein L9                                                                        |
| NM_144918            | <i>Smyd5</i>          | 1.980                        | 5.77E-04    | SET and MYND domain containing 5                                                                          |
| NM_028042            | <i>Erc8</i>           | 1.980                        | 5.78E-04    | excision repair cross-complementing rodent repair deficiency, complementation group 8                     |
| NM_001013780         | <i>Slc25a34</i>       | 1.975                        | 0.001750939 | solute carrier family 25, member 34                                                                       |
| NM_010757            | <i>Mafk</i>           | 1.975                        | 0.003958511 | v-maf musculoaponeurotic fibrosarcoma oncogene family, protein K (avian)                                  |
| NM_080848            | <i>Wdr5</i>           | 1.975                        | 4.83E-04    | WD repeat domain 5                                                                                        |
| NM_026500///NM_      | <i>Ddx59</i>          | 1.974                        | 0.002595066 | DEAD (Asp-Glu-Ala-Asp) box polypeptide 59                                                                 |
| NM_001039157///N     | <i>Ube2j2</i>         | 1.973                        | 2.39E-04    | ubiquitin-conjugating enzyme E2J 2                                                                        |
| NM_025500            | <i>Mrpl37</i>         | 1.973                        | 0.003853279 | mitochondrial ribosomal protein L37                                                                       |
| NM_173400            | <i>Haus6</i>          | 1.970                        | 0.001089375 | HAUS augmin-like complex, subunit 6                                                                       |
| NM_027529            | <i>6330409D20Rik</i>  | 1.969                        | 7.33E-04    | RIKEN cDNA 6330409D20 gene                                                                                |
| NM_145742            | <i>Dhx35</i>          | 1.967                        | 0.004319004 | DEAH (Asp-Glu-Ala-His) box polypeptide 35                                                                 |
| NM_019425            | <i>Gnpnat1</i>        | 1.967                        | 0.001769273 | glucosamine-phosphate N-acetyltransferase 1                                                               |
| NM_008681            | <i>Ndrp1</i>          | 1.963                        | 7.15E-04    | N-myc downstream regulated gene 1                                                                         |
| NM_009932            | <i>Col4a2</i>         | 1.961                        | 0.003584707 | collagen, type IV, alpha 2                                                                                |
| NM_152804            | <i>Plk2</i>           | 1.960                        | 3.69E-04    | polo-like kinase 2                                                                                        |
| NM_001162921         | <i>Zc3h12c</i>        | 1.959                        | 0.003554222 | zinc finger CCCH type containing 12C                                                                      |
| NM_010907            | <i>Nfkbia</i>         | 1.957                        | 6.75E-04    | nuclear factor of kappa light polypeptide gene enhancer in B cells inhibitor, alpha                       |
| NM_015817            | <i>Ppap2c</i>         | 1.955                        | 7.47E-04    | phosphatidic acid phosphatase type 2C                                                                     |
| NM_001015889///N     | <i>Gm12372///Taf9</i> | 1.955                        | 3.29E-04    | predicted gene 12372///TAF9 RNA polymerase II, TATA box binding protein (TBP)-associated factor           |
| NM_001081212         | <i>Irs2</i>           | 1.954                        | 9.22E-04    | insulin receptor substrate 2                                                                              |
| NM_172814            | <i>Lrp12</i>          | 1.951                        | 0.0040227   | low density lipoprotein-related protein 12                                                                |
| NM_007863            | <i>Mpp3</i>           | 1.950                        | 0.001605832 | membrane protein, palmitoylated 3 (MAGUK p55 subfamily member 3)                                          |
| NM_033074            | <i>Tars</i>           | 1.949                        | 5.39E-04    | threonyl-tRNA synthetase                                                                                  |
| NM_026467            | <i>Rps27l</i>         | 1.949                        | 4.47E-04    | ribosomal protein S27-like                                                                                |
| NM_001080979///N     | <i>Tead4</i>          | 1.947                        | 0.001234603 | TEA domain family member 4                                                                                |
| NM_026894            | <i>Tamm41</i>         | 1.946                        | 5.01E-04    | TAM41, mitochondrial translocator assembly and maintenance protein, homolog (S. cerevisiae)               |
| NM_025301            | <i>Mrpl17</i>         | 1.945                        | 8.79E-04    | mitochondrial ribosomal protein L17                                                                       |
| NM_001025378///N     | <i>Orc2</i>           | 1.945                        | 2.75E-04    | origin recognition complex, subunit 2                                                                     |
| NM_001045550///N     | <i>Mup1</i>           | -49.478                      | 0.008887862 | major urinary protein 1                                                                                   |
| NM_009406            | <i>Tnni3</i>          | -26.589                      | 6.44E-04    | troponin I, cardiac 3                                                                                     |
| NM_009827            | <i>Cckar</i>          | -25.920                      | 0.002935268 | cholecystokinin A receptor                                                                                |
| NM_025540            | <i>Sln</i>            | -23.507                      | 4.56E-05    | sarcoplipin                                                                                               |
| NM_001164171///N     | <i>Myh6///Myh7</i>    | -22.114                      | 5.78E-05    | myosin, heavy polypeptide 6, cardiac muscle, alpha///myosin, heavy polypeptide 7, cardiac muscle, beta    |
| NM_001252591///N     | <i>Smpx</i>           | -18.659                      | 4.36E-04    | small muscle protein, X-linked                                                                            |
| NM_023617            | <i>Aox3</i>           | -17.123                      | 3.88E-05    | aldehyde oxidase 3                                                                                        |
| NM_198415            | <i>Ckmt2</i>          | -14.757                      | 5.92E-05    | creatine kinase, mitochondrial 2                                                                          |
| NM_010858            | <i>Myl4</i>           | -13.278                      | 1.15E-04    | myosin, light polypeptide 4                                                                               |
| NM_001198841///N     | <i>Csrp3</i>          | -12.345                      | 3.77E-04    | cysteine and glycine-rich protein 3                                                                       |
| NM_001110227         | <i>Kcnj13</i>         | -11.068                      | 7.43E-05    | potassium inwardly-rectifying channel, subfamily J, member 13                                             |
| NM_007641            | <i>Ms4a1</i>          | -11.058                      | 9.86E-05    | membrane-spanning 4-domains, subfamily A, member 1                                                        |
| NM_001141927///N     | <i>Pln</i>            | -10.927                      | 2.40E-04    | phospholamban                                                                                             |
| NM_022879            | <i>Myl7</i>           | -10.627                      | 5.77E-04    | myosin, light polypeptide 7, regulatory                                                                   |
| NM_001012324         | <i>Ecm2</i>           | -10.398                      | 2.65E-04    | extracellular matrix protein 2, female organ and adipocyte specific                                       |
| NM_009944            | <i>Cox7a1</i>         | -10.248                      | 6.20E-04    | cytochrome c oxidase subunit VIIa 1                                                                       |
| NM_023624            | <i>Lrat</i>           | -9.864                       | 1.24E-04    | lecithin-retinol acyltransferase (phosphatidylcholine-retinol-O-acyltransferase)                          |
| NM_174857            | <i>Mamdc2</i>         | -9.422                       | 3.40E-05    | MAM domain containing 2                                                                                   |
| NM_021503            | <i>Myoz2</i>          | -9.231                       | 6.21E-04    | myozenin 2                                                                                                |
| NM_011784            | <i>Aplnr</i>          | -9.087                       | 6.52E-05    | apelin receptor                                                                                           |

| RefSeq Transcript ID     | Gene Symbol                       | *FC (Air vs O <sub>2</sub> ) | p (Corr)    | Gene Title                                                                                               |
|--------------------------|-----------------------------------|------------------------------|-------------|----------------------------------------------------------------------------------------------------------|
| NM_018732                | <i>Scn3a</i>                      | -8.940                       | 2.41E-04    | sodium channel, voltage-gated, type III, alpha                                                           |
| NM_008182///NM_009608    | <i>Gsta2///Gm3776///Gsta1</i>     | -8.593                       | 3.17E-04    | glutathione S-transferase, alpha 2 (Yc2)///predicted gene 3776///glutathione S-transferase, alpha 1 (Ya) |
| NM_009608                | <i>Actc1</i>                      | -8.281                       | 9.61E-04    | actin, alpha, cardiac muscle 1                                                                           |
| NM_001164047///NM_009393 | <i>Mb</i>                         | -8.243                       | 2.89E-04    | myoglobin                                                                                                |
| NM_026671                | <i>Tnnc1</i>                      | -8.141                       | 0.001404422 | troponin C, cardiac/slow skeletal                                                                        |
| NM_001130174///NM_011606 | <i>Lypd2</i>                      | -7.862                       | 0.004108078 | Ly6/Plaur domain containing 2                                                                            |
| NM_011606                | <i>Tnnt2</i>                      | -7.854                       | 4.69E-04    | troponin T2, cardiac                                                                                     |
| NM_001002900///NM_145219 | <i>Clec3b</i>                     | -7.853                       | 0.002604679 | C-type lectin domain family 3, member b                                                                  |
| NM_145219                | <i>Higd1c///Mettl7a1</i>          | -7.625                       | 3.40E-05    | HIG1 domain family, member 1C///methyltransferase like 7A1                                               |
| NM_152839                | <i>Lgi3</i>                       | -7.406                       | 4.26E-05    | leucine-rich repeat LGI family, member 3                                                                 |
| NM_025786                | <i>Igj</i>                        | -7.308                       | 0.005861272 | immunoglobulin joining chain                                                                             |
| NM_146017                | <i>Rnf186</i>                     | -7.182                       | 4.49E-04    | ring finger protein 186                                                                                  |
| NM_001136059///NM_017394 | <i>Gabbrp</i>                     | -7.137                       | 0.004560471 | gamma-aminobutyric acid (GABA) A receptor, pi                                                            |
| NM_017394                | <i>Cyp11a1</i>                    | -7.079                       | 0.004515543 | cytochrome P450, family 1, subfamily a, polypeptide 1                                                    |
| NM_011540                | <i>Slc7a10</i>                    | -7.041                       | 4.79E-05    | solute carrier family 7 (cationic amino acid transporter, y+ system), member 10                          |
| NM_020052                | <i>Tcap</i>                       | -7.029                       | 6.52E-05    | titin-cap                                                                                                |
| NM_007621                | <i>Scube2</i>                     | -6.790                       | 4.16E-04    | signal peptide, CUB domain, EGF-like 2                                                                   |
| NM_008760                | <i>Igk-V28</i>                    | -6.704                       | 3.77E-04    | immunoglobulin kappa chain variable 28 (V28)                                                             |
| NM_018778                | <i>Cbr2</i>                       | -6.568                       | 6.03E-04    | carbonyl reductase 2                                                                                     |
| NM_029894                | <i>Ogn</i>                        | -6.564                       | 1.68E-04    | osteoglycin                                                                                              |
| NM_001142952             | <i>Cldn8</i>                      | -6.460                       | 6.77E-04    | claudin 8                                                                                                |
| NM_001166067             | <i>Fam162b</i>                    | -6.435                       | 3.29E-04    | family with sequence similarity 162, member B                                                            |
| NM_001130513///NM_026831 | <i>Fam46c</i>                     | -6.300                       | 0.001941726 | family with sequence similarity 46, member C                                                             |
| NM_026831                | <i>Slc4a5</i>                     | -6.279                       | 1.01E-04    | solute carrier family 4, sodium bicarbonate cotransporter, member 5                                      |
| NM_080462                | <i>Ace2</i>                       | -6.254                       | 1.58E-04    | angiotensin I converting enzyme (peptidyl-dipeptidase A) 2                                               |
| NM_011921                | <i>Mybphl</i>                     | -6.170                       | 5.25E-04    | myosin binding protein H-like                                                                            |
| NM_178118                | <i>Hnmt</i>                       | -6.164                       | 1.68E-04    | histamine N-methyltransferase                                                                            |
| NM_001081346///NM_019866 | <i>Aldh1a7</i>                    | -6.160                       | 0.001195612 | aldehyde dehydrogenase family 1, subfamily A7                                                            |
| NM_019866                | <i>Dixdc1</i>                     | -6.112                       | 3.45E-04    | DIX domain containing 1                                                                                  |
| NM_182839                | <i>Rtkn2</i>                      | -6.110                       | 0.001198963 | rhotekin 2                                                                                               |
| NM_023868                | <i>Spib</i>                       | -6.080                       | 1.68E-04    | Spi-B transcription factor (Spi-1/PU.1 related)                                                          |
| NM_008664                | <i>Tppp</i>                       | -6.047                       | 5.78E-05    | tubulin polymerization promoting protein                                                                 |
| NM_022983                | <i>Ryr2</i>                       | -6.034                       | 7.66E-04    | ryanodine receptor 2, cardiac                                                                            |
| NM_001025364///NM_032541 | <i>Myom2</i>                      | -5.823                       | 1.33E-04    | myomesin 2                                                                                               |
| NM_032541                | <i>Lpar3</i>                      | -5.817                       | 4.40E-04    | lysophosphatidic acid receptor 3                                                                         |
| NM_178405                | <i>Rtn2</i>                       | -5.767                       | 0.001149089 | reticulon 2 (Z-band associated protein)                                                                  |
| NM_175347                | <i>Hamp</i>                       | -5.696                       | 0.001645654 | hepcidin antimicrobial peptide                                                                           |
| NM_001033350             | <i>Atp1a2</i>                     | -5.586                       | 2.82E-04    | ATPase, Na <sup>+</sup> /K <sup>+</sup> transporting, alpha 2 polypeptide                                |
| NM_153529                | <i>Srl</i>                        | -5.580                       | 1.76E-04    | sarcalumenin                                                                                             |
| NM_008829                | <i>Bank1</i>                      | -5.575                       | 1.58E-04    | B cell scaffold protein with ankyrin repeats 1                                                           |
| NM_175692                | <i>Nrn1</i>                       | -5.560                       | 6.52E-05    | neuritin 1                                                                                               |
| NM_177793                | <i>Pgr</i>                        | -5.492                       | 5.33E-04    | progesterone receptor                                                                                    |
| NM_010406                | <i>Snhg11</i>                     | -5.460                       | 0.001019461 | small nucleolar RNA host gene 11                                                                         |
| NM_001008501             | <i>Mettl24</i>                    | -5.422                       | 8.00E-04    | methyltransferase like 24                                                                                |
| NM_010370                | <i>Hc</i>                         | -5.408                       | 7.11E-04    | hemolytic complement                                                                                     |
| NM_009170                | <i>Zfp760</i>                     | -5.401                       | 1.82E-04    | zinc finger protein 760                                                                                  |
| NM_021896                | <i>Gzma</i>                       | -5.398                       | 2.08E-04    | granzyme A                                                                                               |
| NM_011136                | <i>Shh</i>                        | -5.359                       | 9.86E-05    | sonic hedgehog                                                                                           |
| NM_080575                | <i>Gucy1a3</i>                    | -5.337                       | 0.001515375 | guanylate cyclase 1, soluble, alpha 3                                                                    |
| NM_007751                | <i>Pou2af1</i>                    | -5.320                       | 6.59E-04    | POU domain, class 2, associating factor 1                                                                |
| NM_001045481///NM_010570 | <i>Acss1</i>                      | -5.270                       | 5.89E-04    | acyl-CoA synthetase short-chain family member 1                                                          |
| NM_010570                | <i>Cox8b</i>                      | -5.224                       | 0.002212501 | cytochrome c oxidase subunit VIIIb                                                                       |
| NM_054077                | <i>Gm16340///Ifi203///LOC1006</i> | -5.215                       | 0.001340871 | predicted gene 16340///interferon activated gene 203///uncharacterized LOC100862473                      |
| NM_011449                | <i>Irs1</i>                       | -5.146                       | 4.26E-05    | insulin receptor substrate 1                                                                             |
| NM_029620                | <i>Prelp</i>                      | -5.143                       | 1.91E-04    | proline arginine-rich end leucine-rich repeat                                                            |
| NM_001003671///NM_010389 | <i>Spa17</i>                      | -5.135                       | 0.007006854 | sperm autoantigenic protein 17                                                                           |
| NM_010389                | <i>Pcolce2</i>                    | -5.111                       | 3.40E-05    | procollagen C-endopeptidase enhancer 2                                                                   |
| NM_009135                | <i>Pcdha1</i>                     | -5.110                       | 4.26E-05    | protocadherin alpha 16                                                                                   |
| NM_001080814             | <i>H2-Ob</i>                      | -4.917                       | 2.82E-04    | histocompatibility 2, O region beta locus                                                                |
| XM_001472541             | <i>Scn7a</i>                      | -4.867                       | 8.49E-05    | sodium channel, voltage-gated, type VII, alpha                                                           |
| NM_001198914///NM_026976 | <i>Fat3</i>                       | -4.823                       | 1.14E-04    | FAT tumor suppressor homolog 3 (Drosophila)                                                              |
| NM_026976                | <i>Ighm</i>                       | -4.791                       | 0.00373231  | immunoglobulin heavy constant mu                                                                         |
| NM_001081064             | <i>Myb</i>                        | -4.757                       | 0.009976391 | myeloblastosis oncogene                                                                                  |
| NM_001042451///NM_026976 | <i>Sema4f</i>                     | -4.746                       | 3.35E-04    | sema domain, immunoglobulin domain (Ig), TM domain, and short cytoplasmic domain                         |
| NM_026976                | <i>Faim3</i>                      | -4.737                       | 8.18E-04    | Fas apoptotic inhibitory molecule 3                                                                      |
| NM_001081064             | <i>Pdzd2</i>                      | -4.718                       | 1.96E-04    | PDZ domain containing 2                                                                                  |
| NM_172471                | <i>Snca</i>                       | -4.709                       | 0.004845291 | synuclein, alpha                                                                                         |
| NM_021718                | <i>Itih5</i>                      | -4.703                       | 0.005071465 | inter-alpha (globulin) inhibitor H5                                                                      |
| NM_001161665///NM_007735 | <i>Ms4a4b</i>                     | -4.698                       | 0.001128292 | membrane-spanning 4-domains, subfamily A, member 4B                                                      |
| NM_007735                | <i>Kif26b</i>                     | -4.677                       | 0.001690585 | kinesin family member 26B                                                                                |
| NM_001081198             | <i>Col4a4</i>                     | -4.639                       | 1.15E-04    | collagen, type IV, alpha 4                                                                               |
| NM_001160096///NM_024263 | <i>Tmem182</i>                    | -4.616                       | 3.28E-04    | transmembrane protein 182                                                                                |
| NM_024263                | <i>Cldn10</i>                     | -4.570                       | 9.72E-04    | claudin 10                                                                                               |
| NM_033268                | <i>Mxra8</i>                      | -4.534                       | 4.56E-04    | matrix-remodelling associated 8                                                                          |
| NM_008492                | <i>Actn2</i>                      | -4.525                       | 0.002720153 | actinin alpha 2                                                                                          |
| NM_025817                | <i>Ldhb</i>                       | -4.478                       | 8.09E-04    | lactate dehydrogenase B                                                                                  |
| NM_023821///NM_080846    | <i>Tril</i>                       | -4.462                       | 9.20E-05    | TLR4 interactor with leucine-rich repeats                                                                |
| NM_080846                | <i>Higd1b</i>                     | -4.442                       | 3.36E-04    | cardiomyopathy associated 5                                                                              |
| NM_009425                | <i>Tnfrsf10</i>                   | -4.418                       | 0.001608569 | HIG1 domain family, member 1B                                                                            |
| NM_013691                | <i>Thbs3</i>                      | -4.406                       | 1.50E-04    | tumor necrosis factor (ligand) superfamily, member 10                                                    |
| NM_011403                | <i>Thbs3</i>                      | -4.374                       | 7.57E-05    | thrombospondin 3                                                                                         |
| NM_026481                | <i>Slc4a1</i>                     | -4.310                       | 9.34E-05    | solute carrier family 4 (anion exchanger), member 1                                                      |
|                          | <i>Tppp3</i>                      | -4.253                       | 0.005707828 | tubulin polymerization-promoting protein family member 3                                                 |

| RefSeq Transcript ID | Gene Symbol                     | *FC (Air vs O <sub>2</sub> ) | p (Corr)    | Gene Title                                                                                             |
|----------------------|---------------------------------|------------------------------|-------------|--------------------------------------------------------------------------------------------------------|
| NM_011652//NM_       | <b>Ttn</b>                      | -4.248                       | 0.001311058 | titin                                                                                                  |
| NM_008609            | <b>Mmp15</b>                    | -4.236                       | 0.002118693 | matrix metalloproteinase 15                                                                            |
| NM_001102446//N      | <b>Alas2</b>                    | -4.221                       | 0.008583684 | aminolevulinic acid synthase 2, erythroid                                                              |
| NM_001243092//N      | <b>Gm3776//Gsta1//Gsta2</b>     | -4.195                       | 6.95E-04    | predicted gene 3776//glutathione S-transferase, alpha 1 (Ya)//glutathione S-transferase, alpha 2 (Yc2) |
| NM_001033217         | <b>Prickle1</b>                 | -4.180                       | 4.00E-04    | prickle homolog 1 (Drosophila)                                                                         |
| NM_012038            | <b>Vsnl1</b>                    | -4.153                       | 2.48E-04    | visinin-like 1                                                                                         |
| NM_011125            | <b>Pltp</b>                     | -4.145                       | 4.30E-04    | phospholipid transfer protein                                                                          |
| NM_001170669//N      | <b>Pde8b</b>                    | -4.111                       | 9.20E-05    | phosphodiesterase 8B                                                                                   |
| NM_001271708//N      | <b>Lrrn3</b>                    | -4.098                       | 1.86E-04    | leucine rich repeat protein 3, neuronal                                                                |
| NM_198171            | <b>Ces2b</b>                    | -4.067                       | 6.96E-04    | carboxylesterase 2B                                                                                    |
| NM_001252563//N      | <b>Matn4</b>                    | -4.062                       | 1.29E-04    | matrilin 4                                                                                             |
| NM_146013            | <b>Sec14l4</b>                  | -4.062                       | 7.45E-05    | SEC14-like 4 (S. cerevisiae)                                                                           |
| NM_008339            | <b>Cd79b</b>                    | -4.061                       | 0.004846103 | CD79B antigen                                                                                          |
| NM_027391            | <b>lyd</b>                      | -4.057                       | 9.07E-04    | iodotyrosine deiodinase                                                                                |
| NM_145463            | <b>Shisa2</b>                   | -4.053                       | 0.001055663 | shisa homolog 2 (Xenopus laevis)                                                                       |
| NM_153422            | <b>Pde5a</b>                    | -3.999                       | 7.43E-05    | phosphodiesterase 5A, cGMP-specific                                                                    |
| NM_009844            | <b>Cd19</b>                     | -3.985                       | 0.001578967 | CD19 antigen                                                                                           |
| NM_015760            | <b>Nox4</b>                     | -3.984                       | 2.62E-04    | NADPH oxidase 4                                                                                        |
| NM_011415            | <b>Snai2</b>                    | -3.982                       | 2.76E-04    | snail homolog 2 (Drosophila)                                                                           |
| NM_153574            | <b>Fam13a</b>                   | -3.975                       | 4.08E-04    | family with sequence similarity 13, member A                                                           |
| NR_028264            | <b>Dleu2</b>                    | -3.943                       | 5.64E-04    | deleted in lymphocytic leukemia, 2                                                                     |
| NM_007551            | <b>Cxcr5</b>                    | -3.938                       | 8.42E-04    | chemokine (C-X-C motif) receptor 5                                                                     |
| NM_008086            | <b>Gas1</b>                     | -3.920                       | 7.27E-04    | growth arrest specific 1                                                                               |
| NM_153803            | <b>Glb1l2</b>                   | -3.915                       | 2.39E-04    | galactosidase, beta 1-like 2                                                                           |
| NM_011397            | <b>Slc23a1</b>                  | -3.912                       | 5.34E-04    | solute carrier family 23 (nucleobase transporters), member 1                                           |
| NM_001136062//N      | <b>Eno3</b>                     | -3.895                       | 2.93E-04    | enolase 3, beta muscle                                                                                 |
| NM_172479            | <b>Slc38a5</b>                  | -3.874                       | 4.58E-04    | solute carrier family 38, member 5                                                                     |
| NM_010654            | <b>Klrtd1</b>                   | -3.872                       | 0.001412184 | killer cell lectin-like receptor, subfamily D, member 1                                                |
| NM_030203            | <b>Tsply4</b>                   | -3.859                       | 7.13E-05    | TSPY-like 4                                                                                            |
| NM_175446            | <b>Zmat1</b>                    | -3.855                       | 0.001859716 | zinc finger, matrin type 1                                                                             |
| NM_001045481//N      | <b>Gm16340//Ifi203//LOC1006</b> | -3.841                       | 9.30E-04    | predicted gene 16340//interferon activated gene 203//uncharacterized LOC100862473                      |
| NM_133485//NR_C      | <b>Ppp1r14c//Gm14057</b>        | -3.837                       | 2.53E-04    | protein phosphatase 1, regulatory (inhibitor) subunit 14c//Ppp1r14c pseudogene                         |
| NM_183312//NM_       | <b>Synn</b>                     | -3.833                       | 5.51E-04    | synemin, intermediate filament protein                                                                 |
| NM_176846            | <b>Exph5</b>                    | -3.831                       | 0.002179117 | exophilin 5                                                                                            |
| NM_013930            | <b>Aass</b>                     | -3.831                       | 0.001355728 | aminoadipate-semialdehyde synthase                                                                     |
| NM_001043317//N      | <b>Cd22</b>                     | -3.824                       | 1.21E-04    | CD22 antigen                                                                                           |
| NM_133969            | <b>Cyp4v3</b>                   | -3.822                       | 1.74E-04    | cytochrome P450, family 4, subfamily v, polypeptide 3                                                  |
| NM_009749            | <b>Bex2</b>                     | -3.816                       | 0.001044687 | brain expressed X-linked 2                                                                             |
| NM_016854            | <b>Ppp1r3c</b>                  | -3.789                       | 1.39E-04    | protein phosphatase 1, regulatory (inhibitor) subunit 3C                                               |
| NM_175522            | <b>Elfn1</b>                    | -3.764                       | 3.03E-04    | leucine rich repeat and fibronectin type III, extracellular 1                                          |
| NM_177368            | <b>Tmtc2</b>                    | -3.740                       | 5.24E-04    | transmembrane and tetratricopeptide repeat containing 2                                                |
| NM_025877            | <b>Slc25a23</b>                 | -3.738                       | 0.001089407 | solute carrier family 25 (mitochondrial carrier; phosphate carrier), member 23                         |
| NM_181728            | <b>Art3</b>                     | -3.720                       | 1.16E-04    | ADP-ribosyltransferase 3                                                                               |
| NM_026512            | <b>Bphl</b>                     | -3.708                       | 0.005724517 | biphenyl hydrolase-like (serine hydrolase, breast epithelial mucin-associated antigen)                 |
| NM_175441            | <b>Mylk3</b>                    | -3.689                       | 1.68E-04    | myosin light chain kinase 3                                                                            |
| NM_197999            | <b>Ces2g</b>                    | -3.687                       | 0.00253697  | carboxylesterase 2G                                                                                    |
| NM_001113283//N      | <b>Fam214a</b>                  | -3.681                       | 7.38E-05    | family with sequence similarity 214, member A                                                          |
|                      | <b>Igk2</b>                     | -3.678                       | 0.002983615 | immunoglobulin lambda constant 2                                                                       |
| NM_027468            | <b>Cpm</b>                      | -3.646                       | 2.41E-04    | carboxypeptidase M                                                                                     |
| NM_028075            | <b>Tnfrsf13c</b>                | -3.633                       | 2.17E-04    | tumor necrosis factor receptor superfamily, member 13c                                                 |
| NM_001122733//N      | <b>Kit</b>                      | -3.618                       | 1.08E-04    | kit oncogene                                                                                           |
| NM_178256            | <b>Reps2</b>                    | -3.596                       | 7.13E-05    | RALBP1 associated Eps domain containing protein 2                                                      |
| NM_001099774         | <b>Krtap17-1</b>                | -3.583                       | 8.04E-04    | keratin associated protein 17-1                                                                        |
| NM_001081756//N      | <b>Nckap5</b>                   | -3.581                       | 3.28E-04    | NCK-associated protein 5                                                                               |
| NM_010197            | <b>Fgf1</b>                     | -3.570                       | 7.43E-05    | fibroblast growth factor 1                                                                             |
| NM_009623            | <b>Adcy8</b>                    | -3.569                       | 0.009643979 | adenylate cyclase 8                                                                                    |
| NM_001267796//N      | <b>6330403M23Rik//Pura</b>      | -3.560                       | 5.90E-04    | RIKEN cDNA 6330403M23 gene//purine rich element binding protein A                                      |
| NM_001114385//N      | <b>Chrd1</b>                    | -3.560                       | 0.00155429  | chordin-like 1                                                                                         |
| NM_009804            | <b>Cat</b>                      | -3.541                       | 1.29E-04    | catalase                                                                                               |
| NM_011545            | <b>Tcf21</b>                    | -3.532                       | 9.66E-05    | transcription factor 21                                                                                |
| NM_001001309         | <b>Itga8</b>                    | -3.529                       | 3.70E-04    | integrin alpha 8                                                                                       |
| NM_013653            | <b>Ccl5</b>                     | -3.525                       | 6.17E-04    | chemokine (C-C motif) ligand 5                                                                         |
| NM_134042            | <b>Aldh6a1</b>                  | -3.521                       | 7.13E-05    | aldehyde dehydrogenase family 6, subfamily A1                                                          |
| NM_013794            | <b>Klra16</b>                   | -3.508                       | 7.15E-04    | killer cell lectin-like receptor, subfamily A, member 16                                               |
| NM_001164155//N      | <b>Tnfrsf19</b>                 | -3.499                       | 4.44E-04    | tumor necrosis factor receptor superfamily, member 19                                                  |
| NM_080728//NM_       | <b>Myh7//Myh6</b>               | -3.499                       | 5.00E-04    | myosin, heavy polypeptide 7, cardiac muscle, beta//myosin, heavy polypeptide 6, cardiac muscle, alpha  |
| NM_001252627//N      | <b>Cdh16</b>                    | -3.498                       | 3.22E-04    | cadherin 16                                                                                            |
| NM_009676            | <b>Aox1</b>                     | -3.478                       | 3.94E-04    | aldehyde oxidase 1                                                                                     |
| NM_175366            | <b>Mex3b</b>                    | -3.478                       | 0.001605832 | mex3 homolog B (C. elegans)                                                                            |
| NM_001024720         | <b>Hmcn1</b>                    | -3.457                       | 1.01E-04    | hemicentin 1                                                                                           |
| NM_007934            | <b>Enpep</b>                    | -3.455                       | 8.83E-05    | glutamyl aminopeptidase                                                                                |
| NM_133994            | <b>Gstt3</b>                    | -3.422                       | 6.71E-04    | glutathione S-transferase, theta 3                                                                     |
| NM_138741            | <b>Sdpr</b>                     | -3.421                       | 2.64E-04    | serum deprivation response                                                                             |
| NM_011542            | <b>Tcea3</b>                    | -3.413                       | 0.004638682 | transcription elongation factor A (SII), 3                                                             |
| NM_053200            | <b>Ces1d</b>                    | -3.406                       | 3.45E-04    | carboxylesterase 1D                                                                                    |
| NM_008057            | <b>Fzd7</b>                     | -3.383                       | 7.96E-05    | frizzled homolog 7 (Drosophila)                                                                        |
| NM_026950            | <b>Oclad2</b>                   | -3.377                       | 7.96E-05    | OCIA domain containing 2                                                                               |
| NM_178214            | <b>Hist2h2be</b>                | -3.366                       | 9.62E-05    | histone cluster 2, H2be                                                                                |
| NM_007664            | <b>Cdh2</b>                     | -3.362                       | 0.002797552 | cadherin 2                                                                                             |
| NM_009378            | <b>Thbd</b>                     | -3.360                       | 1.29E-04    | thrombomodulin                                                                                         |
| NM_001271599//N      | <b>Sort1</b>                    | -3.360                       | 2.41E-04    | sortilin 1                                                                                             |
| NM_001014399//N      | <b>Abi3bp</b>                   | -3.349                       | 8.04E-05    | ABI gene family, member 3 (NESH) binding protein                                                       |
| NM_011416//NM_       | <b>Smarca2</b>                  | -3.347                       | 2.41E-04    | SWI/SNF related, matrix associated, actin dependent regulator of chromatin, subfamily a, member 2      |

| RefSeq Transcript ID | Gene Symbol     | *FC (Air vs O <sub>2</sub> ) | p (Corr)    | Gene Title                                                                          |
|----------------------|-----------------|------------------------------|-------------|-------------------------------------------------------------------------------------|
| NM_001029836         | <i>Npnt</i>     | -3.338                       | 1.68E-04    | nephronectin                                                                        |
| NM_030018            | <i>Tmem50b</i>  | -3.273                       | 6.57E-05    | transmembrane protein 50B                                                           |
| NM_020259            | <i>Hhip</i>     | -3.270                       | 4.80E-04    | Hedgehog-interacting protein                                                        |
| NM_001253867         | <i>Tmem205</i>  | -3.266                       | 5.01E-04    | transmembrane protein 205                                                           |
| NM_001076791         | <i>Zfp874b</i>  | -3.258                       | 2.76E-04    | zinc finger protein 874b                                                            |
| NM_172907            | <i>Olfml1</i>   | -3.257                       | 0.00241148  | olfactomedin-like 1                                                                 |
| NM_001159986         | <i>Sec16b</i>   | -3.256                       | 6.66E-04    | SEC16 homolog B (S. cerevisiae)                                                     |
| NM_177566            | <i>Arhgef15</i> | -3.254                       | 2.76E-04    | Rho guanine nucleotide exchange factor (GEF) 15                                     |
| NM_027222            | <i>Mzb1</i>     | -3.241                       | 6.38E-04    | marginal zone B and B1 cell-specific protein 1                                      |
| NM_027629            | <i>Pgm2l1</i>   | -3.240                       | 0.008711767 | phosphoglucomutase 2-like 1                                                         |
| NM_178748            | <i>Egflam</i>   | -3.240                       | 2.89E-04    | EGF-like, fibronectin type III and laminin G domains                                |
| NM_029541            | <i>Arxes1</i>   | -3.238                       | 0.002865075 | adipocyte-related X-chromosome expressed sequence 1                                 |
| NM_183183            | <i>Gprin3</i>   | -3.236                       | 0.003020603 | GPRIN family member 3                                                               |
| NM_001039039         | <i>Kctd21</i>   | -3.236                       | 0.001620157 | potassium channel tetramerisation domain containing 21                              |
| NM_172913            | <i>Tox3</i>     | -3.235                       | 9.47E-04    | TOX high mobility group box family member 3                                         |
| NM_153100            | <i>Rtp3</i>     | -3.234                       | 8.05E-04    | receptor transporter protein 3                                                      |
| NM_017378            | <i>Pcdh12</i>   | -3.220                       | 0.002212424 | protocadherin 12                                                                    |
| NM_011707            | <i>Vtn</i>      | -3.216                       | 3.95E-04    | vitronectin                                                                         |
| NM_023665            | <i>D4Wsu53e</i> | -3.204                       | 0.004027749 | DNA segment, Chr 4, Wayne State University 53, expressed                            |
| NM_001033301         | <i>Fhdc1</i>    | -3.195                       | 3.29E-04    | FH2 domain containing 1                                                             |
| NM_013486            | <i>Cd2</i>      | -3.187                       | 0.001686255 | CD2 antigen                                                                         |
| NM_001145857         | <i>Lrp4</i>     | -3.175                       | 1.82E-04    | low density lipoprotein receptor-related protein 4                                  |
| NM_001080707         | <i>Gpr155</i>   | -3.174                       | 0.002033981 | G protein-coupled receptor 155                                                      |
| NM_001163336         | <i>Atp2a3</i>   | -3.173                       | 2.50E-04    | ATPase, Ca++ transporting, ubiquitous                                               |
| NM_008344            | <i>Igf1bp6</i>  | -3.167                       | 8.66E-04    | insulin-like growth factor binding protein 6                                        |
| NM_016704            | <i>C6</i>       | -3.166                       | 1.39E-04    | complement component 6                                                              |
| NM_028235            | <i>Ttc30b</i>   | -3.157                       | 0.004482193 | tetratricopeptide repeat domain 30B                                                 |
| NM_172778            | <i>Maob</i>     | -3.149                       | 5.78E-05    | monoamine oxidase B                                                                 |
| NM_001159850         | <i>Kcnk2</i>    | -3.146                       | 4.49E-04    | potassium channel, subfamily K, member 2                                            |
| NM_009349            | <i>Inmt</i>     | -3.146                       | 0.003108903 | indoethylamine N-methyltransferase                                                  |
| NM_018870            | <i>Pgam2</i>    | -3.136                       | 0.001578967 | phosphoglycerate mutase 2                                                           |
| NM_153145            | <i>Abca8a</i>   | -3.135                       | 0.005864564 | ATP-binding cassette, sub-family A (ABC1), member 8a                                |
| NM_007758            | <i>Cr2</i>      | -3.124                       | 0.001299643 | complement receptor 2                                                               |
| NM_001081416         | <i>Fndc1</i>    | -3.121                       | 0.007422347 | fibronectin type III domain containing 1                                            |
| NM_009421            | <i>Traf1</i>    | -3.116                       | 1.88E-04    | TNF receptor-associated factor 1                                                    |
| NM_001114174         | <i>Fam189a2</i> | -3.113                       | 0.001784032 | family with sequence similarity 189, member A2                                      |
| NM_175523            | <i>Ppm1k</i>    | -3.110                       | 7.43E-05    | protein phosphatase 1K (PP2C domain containing)                                     |
| NM_001177503         | <i>Plekhd1</i>  | -3.107                       | 0.001879665 | pleckstrin homology domain containing, family D (with coiled-coil domains) member 1 |
| NM_001163154         | <i>Etv1</i>     | -3.101                       | 9.47E-04    | ets variant gene 1/predicted gene 5454                                              |
| NM_001252401         | <i>Tie2</i>     | -3.091                       | 0.002039599 | transducin-like enhancer of split 2, homolog of Drosophila E(spl)                   |
| NM_001159745         | <i>St8sia4</i>  | -3.083                       | 5.59E-05    | ST8 alpha-N-acetyl-neuraminidase alpha-2,8-sialyltransferase 4                      |
| NM_001159632         | <i>Atp6v1c2</i> | -3.081                       | 1.74E-04    | ATPase, H+ transporting, lysosomal V1 subunit C2                                    |
| NM_054041            | <i>Antxr1</i>   | -3.077                       | 1.58E-04    | anthrax toxin receptor 1                                                            |
| NM_001145813         | <i>Elf5</i>     | -3.067                       | 0.005771829 | E74-like factor 5                                                                   |
| NM_001161763         | <i>Fmo5</i>     | -3.066                       | 2.80E-04    | flavin containing monooxygenase 5                                                   |
| NM_011395            | <i>Slc22a3</i>  | -3.061                       | 0.001657702 | solute carrier family 22 (organic cation transporter), member 3                     |
| NM_001083906         | <i>Nr3c2</i>    | -3.051                       | 2.41E-04    | nuclear receptor subfamily 3, group C, member 2                                     |
| NM_153594            | <i>Pcmdt2</i>   | -3.047                       | 1.16E-04    | protein-L-isoaspartate (D-aspartate) O-methyltransferase domain containing 2        |
| NM_013811            | <i>Dnah8</i>    | -3.042                       | 0.001928523 | dynein, axonemal, heavy chain 8                                                     |
| NM_001081567         | <i>Mapk10</i>   | -3.030                       | 0.004139287 | mitogen-activated protein kinase 10                                                 |
| NM_009789            | <i>S100g</i>    | -3.020                       | 0.002522721 | S100 calcium binding protein G                                                      |
| NM_001003914         | <i>Obscn</i>    | -3.019                       | 0.003496041 | obscurin, cytoskeletal calmodulin and titin-interacting RhoGEF                      |
| NM_010621            | <i>Stard9</i>   | -3.016                       | 2.98E-04    | START domain containing 9                                                           |
| NM_007563            | <i>Bpgm</i>     | -3.000                       | 0.002602705 | 2,3-bisphosphoglycerate mutase                                                      |
| NM_018734            | <i>Gbp3</i>     | -2.997                       | 0.001597892 | guanylate binding protein 3                                                         |
| NM_178874            | <i>Tmcc2</i>    | -2.991                       | 7.51E-04    | transmembrane and coiled-coil domains 2                                             |
| NM_054103            | <i>Stk33</i>    | -2.983                       | 0.006537725 | serine/threonine kinase 33                                                          |
| NM_173788            | <i>Npr2</i>     | -2.972                       | 3.82E-04    | natriuretic peptide receptor 2                                                      |
| NM_007511            | <i>Atp7b</i>    | -2.966                       | 0.00123706  | ATPase, Cu++ transporting, beta polypeptide                                         |
| NM_001083312         | <i>Gbp7</i>     | -2.966                       | 3.29E-04    | guanylate binding protein 7                                                         |
| NM_001277903         | <i>Tnnt1</i>    | -2.963                       | 3.28E-04    | troponin T1, skeletal, slow                                                         |
| NM_024264            | <i>Cyp27a1</i>  | -2.959                       | 1.27E-04    | cytochrome P450, family 27, subfamily a, polypeptide 1                              |
| NM_177775            | <i>Esy3</i>     | -2.941                       | 6.59E-04    | extended synaptotagmin-like protein 3                                               |
| NM_001136061         | <i>Ednrb</i>    | -2.938                       | 4.85E-04    | endothelin receptor type B                                                          |
| NM_001161842         | <i>Il18r1</i>   | -2.937                       | 0.001678562 | interleukin 18 receptor 1                                                           |
| NM_010680            | <i>Lama3</i>    | -2.927                       | 1.54E-04    | laminin, alpha 3                                                                    |
| NM_001033322         | <i>Gucy1a2</i>  | -2.925                       | 9.89E-04    | guanylate cyclase 1, soluble, alpha 2                                               |
| NM_001110009         | <i>Apoc1</i>    | -2.919                       | 0.005123673 | apolipoprotein C-I                                                                  |
| NM_001081154         | <i>Marf1</i>    | -2.901                       | 0.004587661 | meiosis arrest female 1                                                             |
| NM_007868            | <i>Dmd</i>      | -2.883                       | 4.86E-04    | dystrophin, muscular dystrophy                                                      |
| NM_134110            | <i>Kcne2</i>    | -2.879                       | 0.005823636 | potassium voltage-gated channel, Isk-related subfamily, gene 2                      |
| NM_172872            | <i>Kank4</i>    | -2.874                       | 0.002877965 | KN motif and ankyrin repeat domains 4                                               |
| NM_174995            | <i>Mgst2</i>    | -2.872                       | 0.004264744 | microsomal glutathione S-transferase 2                                              |
| NM_027626            | <i>Psd3</i>     | -2.867                       | 3.16E-04    | pleckstrin and Sec7 domain containing 3                                             |
| NM_133660            | <i>Ces1e</i>    | -2.865                       | 0.005288303 | carboxylesterase 1E                                                                 |
| NM_001034863         | <i>Tmem136</i>  | -2.859                       | 7.05E-04    | transmembrane protein 136                                                           |
| NM_001013370         | <i>Sesn1</i>    | -2.858                       | 1.50E-04    | sestrin 1                                                                           |
| NM_139269            | <i>Pla2g16</i>  | -2.857                       | 5.77E-04    | phospholipase A2, group XVI                                                         |
| NM_019503            | <i>Fxyd1</i>    | -2.854                       | 0.003178824 | FXD domain-containing ion transport regulator 1                                     |
| NM_013712            | <i>Itgb1bp2</i> | -2.850                       | 1.72E-04    | integrin beta 1 binding protein 2                                                   |
| NM_001122756         | <i>Corin</i>    | -2.839                       | 0.004162732 | corin                                                                               |
| NM_001109661         | <i>Bach2</i>    | -2.832                       | 1.68E-04    | BTB and CNC homology 2                                                              |
| NM_029398            | <i>Tmem14a</i>  | -2.827                       | 0.004279444 | transmembrane protein 14A                                                           |



| RefSeq Transcript | IC Gene Symbol            | *FC (Air vs O <sub>2</sub> ) | p (Corr)    | Gene Title                                                                                     |
|-------------------|---------------------------|------------------------------|-------------|------------------------------------------------------------------------------------------------|
| NM_177756         | <i>Colgalt2</i>           | -2.827                       | 0.001240698 | collagen beta(1-O)galactosyltransferase 2                                                      |
| NM_001166493///N  | <i>Rasgrp3</i>            | -2.826                       | 0.001890957 | RAS, guanyl releasing protein 3                                                                |
| NM_001113323      | <i>Glb1l3</i>             | -2.821                       | 0.001596298 | galactosidase, beta 1 like 3                                                                   |
| NM_001114339///N  | <i>Pank1</i>              | -2.802                       | 0.006714245 | pantothenate kinase 1                                                                          |
| NM_016678         | <i>Reck</i>               | -2.802                       | 6.20E-04    | reversion-inducing-cysteine-rich protein with kazal motifs                                     |
| NM_012050         | <i>Omd</i>                | -2.799                       | 4.03E-04    | osteomodulin                                                                                   |
| NM_178899         | <i>Hepacam2</i>           | -2.798                       | 2.85E-04    | HEPACAM family member 2                                                                        |
| NM_001252458///N  | <i>Prkd2</i>              | -2.796                       | 2.18E-04    | protein kinase D2                                                                              |
| NM_172543         | <i>Fam117a</i>            | -2.792                       | 1.16E-04    | family with sequence similarity 117, member A                                                  |
| NM_146126         | <i>Sord</i>               | -2.787                       | 2.41E-04    | sorbitol dehydrogenase                                                                         |
| NM_010151         | <i>Nr2f1</i>              | -2.783                       | 0.001378992 | nuclear receptor subfamily 2, group F, member 1                                                |
| NM_026793         | <i>Myct1</i>              | -2.779                       | 2.77E-04    | myc target 1                                                                                   |
| NM_029619         | <i>Msrb2</i>              | -2.779                       | 0.002044925 | methionine sulfoxide reductase B2                                                              |
| NM_013462         | <i>Adrb3</i>              | -2.774                       | 1.68E-04    | adrenergic receptor, beta 3                                                                    |
| NM_146015         | <i>Efemp1</i>             | -2.768                       | 0.009804216 | epidermal growth factor-containing fibulin-like extracellular matrix protein 1                 |
| NM_028626         | <i>Mcee</i>               | -2.767                       | 0.001501518 | methylmalonyl CoA epimerase                                                                    |
| NM_001159965///N  | <i>Ralgps2</i>            | -2.765                       | 9.47E-04    | Ral GEF with PH domain and SH3 binding motif 2                                                 |
| NM_026192         | <i>Calcoco1</i>           | -2.763                       | 0.00145978  | calcium binding and coiled coil domain 1                                                       |
| NM_029555         | <i>Gstk1</i>              | -2.763                       | 0.001033408 | glutathione S-transferase kappa 1                                                              |
| NM_007639         | <i>Cd1d1</i>              | -2.762                       | 8.68E-04    | CD1d1 antigen                                                                                  |
| NM_007710         | <i>Ckm</i>                | -2.761                       | 0.002401592 | creatine kinase, muscle                                                                        |
| NM_153578         | <i>Nipa1</i>              | -2.760                       | 2.80E-04    | non imprinted in Prader-Willi/Angelman syndrome 1 homolog (human)                              |
| NM_023653         | <i>Wnt2</i>               | -2.757                       | 8.62E-04    | wingless-related MMTV integration site 2                                                       |
| NM_001039071///N  | <i>Ldb3</i>               | -2.755                       | 0.005516979 | LIM domain binding 3                                                                           |
| NM_001109988///N  | <i>Nrep</i>               | -2.746                       | 4.62E-04    | neuronal regeneration related protein                                                          |
| NM_175429         | <i>Kctd12b</i>            | -2.745                       | 0.002274961 | potassium channel tetramerisation domain containing 12b                                        |
| NM_008520         | <i>Ltbp3</i>              | -2.741                       | 0.001083616 | latent transforming growth factor beta binding protein 3                                       |
| NM_001113386///N  | <i>Lifr</i>               | -2.739                       | 2.76E-04    | leukemia inhibitory factor receptor                                                            |
| NM_008011         | <i>Fgfr4</i>              | -2.738                       | 4.80E-04    | fibroblast growth factor receptor 4                                                            |
| NM_001267846///N  | <i>Fign</i>               | -2.737                       | 4.88E-04    | fidgetin                                                                                       |
| NM_028306         | <i>Hspa12b</i>            | -2.736                       | 8.72E-04    | heat shock protein 12B                                                                         |
| NM_023785         | <i>Ppbp</i>               | -2.734                       | 0.009913875 | pro-platelet basic protein                                                                     |
| NM_182805         | <i>Gpt</i>                | -2.726                       | 2.11E-04    | glutamic pyruvic transaminase, soluble                                                         |
| NM_178767         | <i>Agmo</i>               | -2.721                       | 0.001524561 | alkylglycerol monooxygenase                                                                    |
| NM_177157         | <i>Gchfr</i>              | -2.713                       | 6.70E-04    | GTP cyclohydrolase I feedback regulator                                                        |
|                   | <i>Iglc1///Iglv1</i>      | -2.712                       | 6.46E-04    | immunoglobulin lambda constant 1///immunoglobulin lambda variable 1                            |
| NM_001039546///N  | <i>Myo6</i>               | -2.712                       | 0.00123908  | myosin VI                                                                                      |
| NM_019641         | <i>Stmn1///Gm11223</i>    | -2.711                       | 0.002303129 | stathmin 1///stathmin 1 pseudogene                                                             |
| NM_025807         | <i>Slc16a9</i>            | -2.710                       | 3.41E-04    | solute carrier family 16 (monocarboxylic acid transporters), member 9                          |
| NM_145220         | <i>App12</i>              | -2.707                       | 2.24E-04    | adaptor protein, phosphotyrosine interaction, PH domain and leucine zipper containing 2        |
| NM_001253737///N  | <i>Fcer2a</i>             | -2.704                       | 7.11E-04    | Fc receptor, IgE, low affinity II, alpha polypeptide                                           |
| NM_001170853///N  | <i>Mndal</i>              | -2.701                       | 2.76E-04    | myeloid nuclear differentiation antigen like                                                   |
| NM_001040085///N  | <i>Sytl2</i>              | -2.695                       | 5.98E-04    | synaptotagmin-like 2                                                                           |
| NM_001081433      | <i>Ankrd44</i>            | -2.692                       | 3.65E-04    | ankyrin repeat domain 44                                                                       |
| NM_133236         | <i>Giccl1</i>             | -2.692                       | 9.86E-05    | glucocorticoid induced transcript 1                                                            |
| NM_001081006///N  | <i>Etl4</i>               | -2.687                       | 1.15E-04    | enhancer trap locus 4                                                                          |
| NM_031392         | <i>Wdr6</i>               | -2.686                       | 7.10E-04    | WD repeat domain 6                                                                             |
| NM_011825         | <i>Grem2</i>              | -2.678                       | 7.02E-04    | gremlin 2 homolog, cysteine knot superfamily (Xenopus laevis)                                  |
| NM_001172481///N  | <i>Aspn</i>               | -2.677                       | 0.002377753 | asporin                                                                                        |
| NM_011923         | <i>Angptl2</i>            | -2.674                       | 7.67E-04    | angiopoietin-like 2                                                                            |
| NM_145394         | <i>Slc44a3</i>            | -2.674                       | 0.002086022 | solute carrier family 44, member 3                                                             |
| NM_177699         | <i>Fhod1</i>              | -2.671                       | 3.30E-04    | formin homology 2 domain containing 1                                                          |
| NR_024097///NM_1  | <i>Gm14057///Ppp1r14c</i> | -2.670                       | 0.002221199 | Ppp1r14c pseudogene///protein phosphatase 1, regulatory (inhibitor) subunit 14c                |
| NM_007988         | <i>Fasn</i>               | -2.669                       | 0.005758877 | fatty acid synthase                                                                            |
| NM_019684         | <i>Srpk3</i>              | -2.668                       | 3.63E-04    | serine/arginine-rich protein specific kinase 3                                                 |
| NM_009850         | <i>Cd3g</i>               | -2.668                       | 0.001474285 | CD3 antigen, gamma polypeptide                                                                 |
| NM_029726         | <i>Trdn</i>               | -2.663                       | 0.001836494 | triadin                                                                                        |
| NM_001135172///N  | <i>C1qtnf7</i>            | -2.660                       | 4.16E-04    | C1q and tumor necrosis factor related protein 7                                                |
| NM_199446         | <i>Phkb</i>               | -2.658                       | 0.002986362 | phosphorylase kinase beta                                                                      |
| NM_025347///NM_   | <i>Ypel3</i>              | -2.657                       | 2.71E-04    | yippee-like 3 (Drosophila)                                                                     |
| NM_019790         | <i>Tmeff2</i>             | -2.649                       | 7.68E-04    | transmembrane protein with EGF-like and two follistatin-like domains 2                         |
| NM_011129         |                           | 4-Sep -2.649                 | 2.24E-04    | septin 4                                                                                       |
| NM_008306         | <i>Ndst1</i>              | -2.638                       | 6.53E-04    | N-deacetylase/N-sulfotransferase (heparan glucosaminyl) 1                                      |
| NM_001205085///N  | <i>Tbx20</i>              | -2.635                       | 5.07E-04    | T-box 20                                                                                       |
| NM_001037719///N  | <i>Btla</i>               | -2.633                       | 0.006824015 | B and T lymphocyte associated                                                                  |
| NM_023051         | <i>Clstn1</i>             | -2.629                       | 2.35E-04    | calsyntenin 1                                                                                  |
| NM_010859         | <i>My13</i>               | -2.628                       | 0.006537725 | myosin, light polypeptide 3                                                                    |
| NM_001145830///N  | <i>Plcb1</i>              | -2.625                       | 1.01E-04    | phospholipase C, beta 1                                                                        |
| NM_001164785///N  | <i>Adamts20</i>           | -2.618                       | 1.33E-04    | a disintegrin-like and metallopeptidase (reprolysin type) with thrombospondin type 1 motif, 20 |
| NM_172588         | <i>Serinc5</i>            | -2.613                       | 3.77E-04    | serine incorporator 5                                                                          |
| NM_007548         | <i>Prdm1</i>              | -2.613                       | 0.005759039 | PR domain containing 1, with ZNF domain                                                        |
| NM_007592         | <i>Car8</i>               | -2.606                       | 2.65E-04    | carbonic anhydrase 8                                                                           |
| NR_003513         | <i>Neat1</i>              | -2.599                       | 1.85E-04    | nuclear paraspeckle assembly transcript 1 (non-protein coding)                                 |
| NM_027526         | <i>Rasgef1a</i>           | -2.598                       | 0.003177782 | RasGEF domain family, member 1A                                                                |
| NM_001166553///N  | <i>Rnf145</i>             | -2.595                       | 9.86E-05    | ring finger protein 145                                                                        |
| NM_170778         | <i>Dpyd</i>               | -2.592                       | 0.00289723  | dihydropyrimidine dehydrogenase                                                                |
| NM_009324         | <i>Tbx2</i>               | -2.587                       | 4.89E-04    | T-box 2                                                                                        |
| NM_144942         | <i>Csad</i>               | -2.580                       | 1.04E-04    | cysteine sulfinic acid decarboxylase                                                           |
| NM_001163155///N  | <i>Col4a5</i>             | -2.579                       | 0.008702599 | collagen, type IV, alpha 5                                                                     |
| NM_010260         | <i>Gbp2</i>               | -2.579                       | 9.06E-04    | guanylate binding protein 2                                                                    |
| NM_175260         | <i>Myh10</i>              | -2.578                       | 1.46E-04    | myosin, heavy polypeptide 10, non-muscle                                                       |
| NM_020559         | <i>Alas1</i>              | -2.574                       | 2.83E-04    | aminolevulinic acid synthase 1                                                                 |
| NM_001190333///N  | <i>Ccr6</i>               | -2.574                       | 6.06E-04    | chemokine (C-C motif) receptor 6                                                               |

| RefSeq Transcript | IC Gene Symbol              | *FC (Air vs O <sub>2</sub> ) | p (Corr)    | Gene Title                                                                        |
|-------------------|-----------------------------|------------------------------|-------------|-----------------------------------------------------------------------------------|
| NM_008591         | <b>Met</b>                  | -2.570                       | 3.84E-04    | met proto-oncogene                                                                |
| NM_178111         | <b>Trp53inp2</b>            | -2.567                       | 0.00145598  | transformation related protein 53 inducible nuclear protein 2                     |
| NM_001159543///N  | <b>Dpp4</b>                 | -2.565                       | 1.97E-04    | dipeptidylpeptidase 4                                                             |
| NM_021452         | <b>Kcnmb4</b>               | -2.550                       | 0.003208843 | potassium large conductance calcium-activated channel, subfamily M, beta member 4 |
| NM_011067         | <b>Per3</b>                 | -2.546                       | 0.004606443 | period circadian clock 3                                                          |
| NM_026146         | <b>Eps8l1</b>               | -2.546                       | 3.72E-04    | EPS8-like 1                                                                       |
| NM_001142335///N  | <b>Lmo2</b>                 | -2.545                       | 0.001560419 | LIM domain only 2                                                                 |
| NM_008287         | <b>Hrsp12</b>               | -2.544                       | 0.003026003 | heat-responsive protein 12                                                        |
| NM_001146690///N  | <b>Chpt1</b>                | -2.539                       | 8.52E-04    | choline phosphotransferase 1                                                      |
| NM_199018         | <b>Stard8</b>               | -2.538                       | 2.76E-04    | START domain containing 8                                                         |
| NM_001114879///N  | <b>D14Abb1e</b>             | -2.538                       | 7.69E-04    | DNA segment, Chr 14, Abbott 1 expressed                                           |
| NM_001145959///N  | <b>Ndrq2</b>                | -2.538                       | 3.64E-04    | N-myc downstream regulated gene 2                                                 |
| NM_172463         | <b>Sned1</b>                | -2.535                       | 4.86E-04    | sushi, nidogen and EGF-like domains 1                                             |
| NM_007914         | <b>Ehf</b>                  | -2.532                       | 9.08E-04    | ets homologous factor                                                             |
| NM_001163533///N  | <b>Rtdr1</b>                | -2.529                       | 0.00760186  | rhabdoid tumor deletion region gene 1                                             |
| NM_009219         | <b>Sstr4</b>                | -2.529                       | 0.001546612 | somatostatin receptor 4                                                           |
| NM_001163557///N  | <b>Ppfbp2</b>               | -2.528                       | 5.91E-04    | PTPRF interacting protein, binding protein 2 (liprin beta 2)                      |
| NM_001014288///N  | <b>Ptprd</b>                | -2.528                       | 3.29E-04    | protein tyrosine phosphatase, receptor type, D                                    |
| NM_018826         | <b>Irx5</b>                 | -2.527                       | 0.001832486 | Iroquois related homeobox 5 (Drosophila)                                          |
| NM_019427         | <b>Epb4.114b</b>            | -2.527                       | 7.93E-04    | erythrocyte protein band 4.1-like 4b                                              |
| NM_001029937      | <b>Sec14l3</b>              | -2.525                       | 0.001187766 | SEC14-like 3 (S. cerevisiae)                                                      |
| NM_153801         | <b>Tecrl</b>                | -2.525                       | 0.002047945 | trans-2,3-enoyl-CoA reductase-like                                                |
| NM_001160215///N  | <b>Fcrla</b>                | -2.517                       | 0.007491329 | Fc receptor-like A                                                                |
| NM_001081977///N  | <b>Rnf144a</b>              | -2.514                       | 4.58E-04    | ring finger protein 144A                                                          |
| NM_007419         | <b>Adrb1</b>                | -2.510                       | 0.005517647 | adrenergic receptor, beta 1                                                       |
| NM_009955         | <b>Dpysl2</b>               | -2.509                       | 9.34E-05    | dihydropyrimidinase-like 2                                                        |
| NM_024253         | <b>Nkg7</b>                 | -2.507                       | 0.004040194 | natural killer cell group 7 sequence                                              |
| XM_977361         | <b>Tcrb-1///Trbv1</b>       | -2.505                       | 0.009810162 | T-cell receptor beta-2 chain C region-like                                        |
| NM_177355         | <b>Plcx3</b>                | -2.504                       | 9.36E-04    | phosphatidylinositol-specific phospholipase C, X domain containing 3              |
| NM_001039581///N  | <b>Abca3</b>                | -2.504                       | 2.93E-04    | ATP-binding cassette, sub-family A (ABC1), member 3                               |
| NM_178711         | <b>Plscr4</b>               | -2.500                       | 4.20E-04    | phospholipid scramblase 4                                                         |
| NM_175026         | <b>Pyhin1</b>               | -2.497                       | 0.001149367 | pyrin and HIN domain family, member 1                                             |
| NM_001007220///N  | <b>Adam22</b>               | -2.494                       | 4.34E-04    | a disintegrin and metallopeptidase domain 22                                      |
| NM_019759         | <b>Dpt</b>                  | -2.493                       | 0.006780631 | dermatopontin                                                                     |
| NM_001113527///N  | <b>Isg20</b>                | -2.493                       | 2.17E-04    | interferon-stimulated protein                                                     |
| NM_172145         | <b>Eva1b</b>                | -2.490                       | 2.79E-04    | eva-1 homolog B (C. elegans)                                                      |
| NM_009150         | <b>Selenbp1</b>             | -2.489                       | 0.006994343 | selenium binding protein 1                                                        |
| NM_021472///NM_   | <b>Rnase4</b>               | -2.489                       | 1.29E-04    | ribonuclease, RNase A family 4                                                    |
| NM_021345         | <b>Ptplad1</b>              | -2.487                       | 2.76E-04    | protein tyrosine phosphatase-like A domain containing 1                           |
| NM_010473         | <b>Hrc</b>                  | -2.486                       | 2.07E-04    | histidine rich calcium binding protein                                            |
| NM_011770         | <b>Ikarf2</b>               | -2.480                       | 0.00507514  | IKAROS family zinc finger 2                                                       |
| NM_021320         | <b>Ntn4</b>                 | -2.479                       | 3.33E-04    | netrin 4                                                                          |
| NM_009437         | <b>Tst</b>                  | -2.479                       | 0.007463692 | thiosulfate sulfurtransferase, mitochondrial                                      |
| NM_133746         | <b>Calhm2</b>               | -2.476                       | 3.88E-04    | calcium homeostasis modulator 2                                                   |
| NM_010207///NM_   | <b>Fgfr2</b>                | -2.475                       | 3.77E-04    | fibroblast growth factor receptor 2                                               |
| NM_021355         | <b>Fmod</b>                 | -2.473                       | 0.001755369 | fibromodulin                                                                      |
| NM_020567         | <b>Gmn</b>                  | -2.471                       | 8.08E-04    | geminin                                                                           |
| NM_001252555///N  | <b>Gstz1</b>                | -2.470                       | 0.002339523 | glutathione transferase zeta 1 (maleylacetoacetate isomerase)                     |
| NM_013478         | <b>Azgp1</b>                | -2.469                       | 0.009629243 | alpha-2-glycoprotein 1, zinc                                                      |
| NM_144812///NM_   | <b>Tnrc6b</b>               | -2.468                       | 1.31E-04    | trinucleotide repeat containing 6b                                                |
| NM_001195431///N  | <b>Islr</b>                 | -2.468                       | 0.006786901 | immunoglobulin superfamily containing leucine-rich repeat                         |
| NM_023186         | <b>Chia</b>                 | -2.459                       | 5.32E-04    | chitinase, acidic                                                                 |
| NM_007981         | <b>Acs1l</b>                | -2.459                       | 0.001377418 | acyl-CoA synthetase long-chain family member 1                                    |
| NM_013476         | <b>Ar</b>                   | -2.458                       | 9.25E-04    | androgen receptor                                                                 |
| NM_008259         | <b>Foxa1</b>                | -2.456                       | 8.04E-04    | forkhead box A1                                                                   |
| NM_027823         | <b>Arhgap42</b>             | -2.455                       | 0.00112995  | Rho GTPase activating protein 42                                                  |
| NM_001145164///N  | <b>Tgtp1///Tgtp2</b>        | -2.453                       | 0.005057073 | T cell specific GTPase 1///T cell specific GTPase 2                               |
| NM_008417         | <b>Kcna2</b>                | -2.452                       | 2.38E-04    | potassium voltage-gated channel, shaker-related subfamily, member 2               |
| NM_009006         | <b>Map4k2</b>               | -2.450                       | 2.17E-04    | mitogen-activated protein kinase kinase kinase kinase 2                           |
| NM_153170         | <b>Slc36a2</b>              | -2.449                       | 0.003370586 | solute carrier family 36 (proton/amino acid symporter), member 2                  |
| NM_023873         | <b>Cep70</b>                | -2.444                       | 1.96E-04    | centrosomal protein 70                                                            |
| NM_023134         | <b>Sftpa1</b>               | -2.443                       | 0.008285309 | surfactant associated protein A1                                                  |
| NM_001013013      | <b>Dhrs7c</b>               | -2.442                       | 0.004752389 | dehydrogenase/reductase (SDR family) member 7C                                    |
| NM_029077         | <b>Trim14</b>               | -2.440                       | 0.002520105 | tripartite motif-containing 14                                                    |
| NM_007642         | <b>Cd28</b>                 | -2.440                       | 5.52E-04    | CD28 antigen                                                                      |
| NM_001037723///N  | <b>Adcy7</b>                | -2.437                       | 8.03E-04    | adenylate cyclase 7                                                               |
| NM_173749         | <b>Pamr1</b>                | -2.436                       | 0.003285761 | peptidase domain containing associated with muscle regeneration 1                 |
| NM_027265///NM_   | <b>Il17rd</b>               | -2.434                       | 2.40E-04    | interleukin 17 receptor D                                                         |
| NM_026346         | <b>Fbxo32</b>               | -2.433                       | 3.71E-04    | F-box protein 32                                                                  |
| NM_146008         | <b>Tcp112</b>               | -2.431                       | 9.10E-04    | t-complex 11 (mouse) like 2                                                       |
| NM_001083895///N  | <b>Srpax2</b>               | -2.429                       | 7.66E-04    | sushi-repeat-containing protein, X-linked 2                                       |
| NM_138956         | <b>Rassf3</b>               | -2.426                       | 0.00198089  | Ras association (RalGDS/AF-6) domain family member 3                              |
| NM_019811         | <b>Acss2</b>                | -2.426                       | 0.001378992 | acyl-CoA synthetase short-chain family member 2                                   |
| NM_145382         | <b>Fam193b</b>              | -2.426                       | 0.001806099 | family with sequence similarity 193, member B                                     |
| NM_201361         | <b>Rmdn2</b>                | -2.424                       | 0.001158827 | regulator of microtubule dynamics 2                                               |
| NM_001252105///N  | <b>Cadps2</b>               | -2.420                       | 0.001066288 | Ca2+-dependent activator protein for secretion 2                                  |
| NM_009275///NM_   | <b>Srprb///Trf</b>          | -2.420                       | 0.002179589 | signal recognition particle receptor, B subunit///transferrin                     |
| NM_019588         | <b>Plce1</b>                | -2.419                       | 9.16E-04    | phospholipase C, epsilon 1                                                        |
| NM_023184         | <b>Klf15</b>                | -2.416                       | 0.001443687 | Kruppel-like factor 15                                                            |
| NM_013605         | <b>Muc1</b>                 | -2.414                       | 0.003351672 | mucin 1, transmembrane                                                            |
| NM_007671         | <b>Cdkn2c</b>               | -2.412                       | 5.00E-04    | cyclin-dependent kinase inhibitor 2C (p18, inhibits CDK4)                         |
| NM_008989///NM_   | <b>Pura///6330403M23Rik</b> | -2.411                       | 5.58E-04    | purine rich element binding protein A///RIKEN cDNA 6330403M23 gene                |
| NM_026178         | <b>Mmd</b>                  | -2.402                       | 9.04E-04    | monocyte to macrophage differentiation-associated                                 |

| RefSeq Transcript ID Gene Symbol          | *FC (Air vs O <sub>2</sub> ) | p (Corr)    | Gene Title                                                                      |
|-------------------------------------------|------------------------------|-------------|---------------------------------------------------------------------------------|
| NM_001165939//N <b>Tshb</b>               | -2.397                       | 0.005496437 | thyroid stimulating hormone, beta subunit                                       |
| NM_011077 <b>Phex</b>                     | -2.397                       | 0.003288299 | phosphate regulating gene with homologies to endopeptidases on the X chromosome |
| NM_139144 <b>Ogt</b>                      | -2.395                       | 1.45E-04    | O-linked N-acetylglucosamine (GlcNAc) transferase                               |
| NM_172435 <b>P2ry10</b>                   | -2.394                       | 0.006720671 | purinergic receptor P2Y, G-protein coupled 10                                   |
| NM_009236 <b>Sox18</b>                    | -2.392                       | 0.008887862 | SRY-box containing gene 18                                                      |
| NM_172448 <b>Rnf43</b>                    | -2.390                       | 0.008478482 | ring finger protein 43                                                          |
| NM_080793 <b>Setd7</b>                    | -2.389                       | 2.02E-04    | SET domain containing (lysine methyltransferase) 7                              |
| NM_009911 <b>Cxcr4</b>                    | -2.387                       | 6.75E-04    | chemokine (C-X-C motif) receptor 4                                              |
| NM_001098233//N <b>Purg</b>               | -2.385                       | 6.50E-04    | purine-rich element binding protein G                                           |
| NM_138313 <b>Bmf</b>                      | -2.382                       | 0.001723029 | BCL2 modifying factor                                                           |
| NM_001085415//N <b>Zfp467</b>             | -2.382                       | 0.001999964 | zinc finger protein 467                                                         |
| NM_144847 <b>Nrbp2</b>                    | -2.378                       | 4.16E-04    | nuclear receptor binding protein 2                                              |
| NM_029999 <b>Lbh</b>                      | -2.377                       | 0.005640974 | limb-bud and heart                                                              |
| NM_010358 <b>Gstm1</b>                    | -2.375                       | 0.00198089  | glutathione S-transferase, mu 1                                                 |
| NM_001013786 <b>Zscan26</b>               | -2.375                       | 0.001093711 | zinc finger and SCAN domain containing 26                                       |
| NM_008916 <b>Inpp5k</b>                   | -2.375                       | 8.09E-04    | inositol polyphosphate 5-phosphatase K                                          |
| NM_001162492//N <b>Mpst</b>               | -2.374                       | 0.006537725 | mercaptopyruvate sulfurtransferase                                              |
| NM_011465 <b>Spta1</b>                    | -2.371                       | 0.002919029 | spectrin alpha, erythrocytic 1                                                  |
| NM_145376 <b>Lpcat1</b>                   | -2.369                       | 0.001171902 | lysophosphatidylcholine acyltransferase 1                                       |
| NM_178600 <b>Vkorc1</b>                   | -2.365                       | 0.005917811 | vitamin K epoxide reductase complex, subunit 1                                  |
| NM_177687 <b>Crebl2</b>                   | -2.363                       | 1.58E-04    | cAMP responsive element binding protein-like 2                                  |
| NM_010923//NM_ <b>Nnat</b>                | -2.363                       | 0.003284936 | neuronatin                                                                      |
| NM_177733//NM_ <b>E2f2</b>                | -2.359                       | 3.62E-04    | E2F transcription factor 2                                                      |
| NM_007549 <b>Blk</b>                      | -2.359                       | 4.68E-04    | B lymphoid kinase                                                               |
| NM_181595 <b>Ppp1r9a</b>                  | -2.359                       | 1.52E-04    | protein phosphatase 1, regulatory (inhibitor) subunit 9A                        |
| NM_133245 <b>Ahsp</b>                     | -2.355                       | 6.80E-04    | alpha hemoglobin stabilizing protein                                            |
| NM_080555 <b>Ppap2b</b>                   | -2.354                       | 3.77E-04    | phosphatidic acid phosphatase type 2B                                           |
| NM_011204 <b>Ptpn13</b>                   | -2.352                       | 4.56E-04    | protein tyrosine phosphatase, non-receptor type 13                              |
| NM_173378 <b>Trp53bp2</b>                 | -2.351                       | 1.69E-04    | transformation related protein 53 binding protein 2                             |
| NM_172397//XM_ <b>Limd2//LOC632329</b>    | -2.350                       | 2.40E-04    | LIM domain containing 2//LIM domain-containing protein 2-like                   |
| NM_026516 <b>Tmem178</b>                  | -2.349                       | 0.002713842 | transmembrane protein 178                                                       |
| NM_007998 <b>Fech</b>                     | -2.347                       | 0.001239535 | ferrochelatase                                                                  |
| NM_029057 <b>Tbc1d30</b>                  | -2.345                       | 9.41E-04    | TBC1 domain family, member 30                                                   |
| NM_030697 <b>Kank3</b>                    | -2.345                       | 4.20E-04    | KN motif and ankyrin repeat domains 3                                           |
| NM_001014996 <b>Cenpj</b>                 | -2.344                       | 0.005575034 | centromere protein J                                                            |
| NM_010656 <b>Sspn</b>                     | -2.340                       | 0.004020363 | sarcospan                                                                       |
| NM_134054 <b>Sptssa</b>                   | -2.339                       | 4.48E-04    | serine palmitoyltransferase, small subunit A                                    |
| NM_023245 <b>Palmd</b>                    | -2.329                       | 3.05E-04    | palmdelphin                                                                     |
| NM_144550 <b>Spice1</b>                   | -2.328                       | 0.005060671 | spindle and centriole associated protein 1                                      |
| NM_001083810//N <b>Prr5l</b>              | -2.326                       | 3.28E-04    | proline rich 5 like                                                             |
| NM_001040398//N <b>Setd1b</b>             | -2.326                       | 1.74E-04    | SET domain containing 1B                                                        |
| NM_153781 <b>Pygb</b>                     | -2.324                       | 0.005139725 | brain glycogen phosphorylase                                                    |
| NM_001033198//N <b>Ankrd50</b>            | -2.323                       | 3.90E-04    | ankyrin repeat domain 50                                                        |
| NM_028995 <b>Nipal3</b>                   | -2.322                       | 5.53E-04    | NIPA-like domain containing 3                                                   |
| NM_146236 <b>Tceal1</b>                   | -2.315                       | 2.59E-04    | transcription elongation factor A (SII)-like 1                                  |
| NM_133738 <b>Antxr2</b>                   | -2.315                       | 1.89E-04    | anthrax toxin receptor 2                                                        |
| NM_001253822//N <b>Irx3</b>               | -2.312                       | 6.71E-04    | Iroquois related homeobox 3 (Drosophila)                                        |
| NM_001039056//N <b>Kcnj15</b>             | -2.311                       | 2.28E-04    | potassium inwardly-rectifying channel, subfamily J, member 15                   |
| NM_007655 <b>Cd79a</b>                    | -2.311                       | 3.72E-04    | CD79A antigen (immunoglobulin-associated alpha)                                 |
| NM_029436 <b>Klhl24</b>                   | -2.310                       | 0.006731548 | kelch-like 24                                                                   |
| XM_977361 <b>LOC665506//Tcrb-J//Trbv1</b> | -2.309                       | 0.008020304 | T-cell receptor beta-2 chain C region-like                                      |
| NM_001162532 <b>Fam174b</b>               | -2.309                       | 2.91E-04    | family with sequence similarity 174, member B                                   |
| NM_008212 <b>Hadh</b>                     | -2.309                       | 4.78E-04    | hydroxyacyl-Coenzyme A dehydrogenase                                            |
| NM_008059 <b>G0s2</b>                     | -2.305                       | 5.68E-04    | G0/G1 switch gene 2                                                             |
| NM_027445 <b>Rnf167</b>                   | -2.301                       | 0.001269958 | ring finger protein 167                                                         |
| NM_013881 <b>Ulk2</b>                     | -2.296                       | 3.71E-04    | unc-51 like kinase 2                                                            |
| NM_001005510 <b>Syne2</b>                 | -2.295                       | 3.05E-04    | spectrin repeat containing, nuclear envelope 2                                  |
| NM_001166213 <b>Fam129c</b>               | -2.295                       | 0.006339997 | family with sequence similarity 129, member C                                   |
| NM_001005863//N <b>Mtus1</b>              | -2.294                       | 4.62E-04    | mitochondrial tumor suppressor 1                                                |
| NM_025331 <b>Gng11</b>                    | -2.293                       | 6.17E-04    | guanine nucleotide binding protein (G protein), gamma 11                        |
| NM_010062 <b>Dnase2a</b>                  | -2.293                       | 0.001349824 | deoxyribonuclease II alpha                                                      |
| NM_016712 <b>Tmod4</b>                    | -2.293                       | 8.78E-04    | tropomodulin 4                                                                  |
| NM_007678 <b>Cebpa</b>                    | -2.289                       | 4.56E-04    | CCAAT/enhancer binding protein (C/EBP), alpha                                   |
| NM_008207 <b>H2-T24</b>                   | -2.287                       | 0.004685006 | histocompatibility 2, T region locus 24                                         |
| NM_028765 <b>Acox1</b>                    | -2.284                       | 0.001450804 | acyl-Coenzyme A oxidase-like                                                    |
| NM_001271676//N <b>Ifi47</b>              | -2.284                       | 0.001810734 | interferon gamma inducible protein 47                                           |
| NM_007620 <b>Cbr1</b>                     | -2.280                       | 4.56E-04    | carbonyl reductase 1                                                            |
| NM_001177881//N <b>Mfap3l</b>             | -2.279                       | 0.008403818 | microfibrillar-associated protein 3-like                                        |
| NM_183116 <b>Slc18b1</b>                  | -2.279                       | 0.003301159 | solute carrier family 18, subfamily B, member 1                                 |
| NM_009210//NM_ <b>Hltf</b>                | -2.276                       | 2.48E-04    | helicase-like transcription factor                                              |
| NM_172656//NM_ <b>Stradb</b>              | -2.276                       | 4.34E-04    | STE20-related kinase adaptor beta                                               |
| NM_175480 <b>Zfp612</b>                   | -2.275                       | 0.006179562 | zinc finger protein 612                                                         |
| NM_008695 <b>Nid2</b>                     | -2.275                       | 0.003006224 | nidogen 2                                                                       |
| NM_028763 <b>Cbx6</b>                     | -2.274                       | 0.003162149 | chromobox 6                                                                     |
| NM_007719 <b>Ccr7</b>                     | -2.273                       | 0.002015146 | chemokine (C-C motif) receptor 7                                                |
| NM_178929 <b>Kazal1</b>                   | -2.272                       | 0.004742138 | Kazal-type serine peptidase inhibitor domain 1                                  |
| NM_153403 <b>Ago1</b>                     | -2.271                       | 0.00176573  | argonaute RISC catalytic subunit 1                                              |
| NM_001168620//N <b>Enpp5</b>              | -2.261                       | 8.38E-04    | ectonucleotide pyrophosphatase/phosphodiesterase 5                              |
| NM_019826 <b>Ivd</b>                      | -2.260                       | 0.002125425 | isovaleryl coenzyme A dehydrogenase                                             |
| NM_008278 <b>Hpgd</b>                     | -2.260                       | 0.001160332 | hydroxyprostaglandin dehydrogenase 15 (NAD)                                     |
| NM_001146119//N <b>Fam49a</b>             | -2.259                       | 7.06E-04    | family with sequence similarity 49, member A                                    |
| NM_001163522//N <b>Emcn</b>               | -2.254                       | 0.001908361 | endomucin                                                                       |
| NM_181418 <b>Ushbp1</b>                   | -2.253                       | 4.44E-04    | Usher syndrome 1C binding protein 1                                             |



| RefSeq Transcript                                                                          | IC Gene Symbol                 | *FC (Air vs O <sub>2</sub> ) | p (Corr)    | Gene Title                                                                                                    |
|--------------------------------------------------------------------------------------------|--------------------------------|------------------------------|-------------|---------------------------------------------------------------------------------------------------------------|
| NM_023794                                                                                  | <i>Etv5</i>                    | -2.252                       | 0.004515543 | ets variant gene 5                                                                                            |
| NM_025951//NM_024288                                                                       | <i>Pi4k2b</i>                  | -2.249                       | 0.002800664 | phosphatidylinositol 4-kinase type 2 beta                                                                     |
| NM_024288                                                                                  | <i>Rmnd5a</i>                  | -2.249                       | 3.72E-04    | required for meiotic nuclear division 5 homolog A (S. cerevisiae)                                             |
| NM_145562                                                                                  | <i>Parm1</i>                   | -2.248                       | 0.002038784 | prostate androgen-regulated mucin-like protein 1                                                              |
| NM_001141933//NM_025370                                                                    | <i>Nkain4</i>                  | -2.248                       | 0.006591699 | Na <sup>+</sup> /K <sup>+</sup> transporting ATPase interacting 4                                             |
| NM_025370                                                                                  | <i>Aaed1</i>                   | -2.246                       | 6.77E-04    | AhpC/TSA antioxidant enzyme domain containing 1                                                               |
| NM_001001980//NM_001162941//NM_001167983//NM_019394                                        | <i>Limch1</i>                  | -2.246                       | 3.10E-04    | LIM and calponin homology domains 1                                                                           |
| NM_001162941//NM_001167983//NM_019394                                                      | <i>Mapre2</i>                  | -2.241                       | 0.001794255 | microtubule-associated protein, RP/EB family, member 2                                                        |
| NM_001167983//NM_019394                                                                    | <i>Sipa11</i>                  | -2.236                       | 1.71E-04    | signal-induced proliferation-associated 1 like 1                                                              |
| NM_019394                                                                                  | <i>Mia</i>                     | -2.235                       | 0.002287676 | melanoma inhibitory activity                                                                                  |
| NM_011074                                                                                  | <i>Cdk14</i>                   | -2.233                       | 2.85E-04    | cyclin-dependent kinase 14                                                                                    |
| NM_025359                                                                                  | <i>Tspan13</i>                 | -2.232                       | 3.90E-04    | tetraspanin 13                                                                                                |
| NM_001111320//NM_001253885//NM_199025                                                      | <i>Idh1</i>                    | -2.232                       | 0.001344785 | isocitrate dehydrogenase 1 (NADP <sup>+</sup> ), soluble                                                      |
| NM_001253885//NM_199025                                                                    | <i>Appb1</i>                   | -2.231                       | 0.002829249 | amyloid beta (A4) precursor protein-binding, family B, member 1                                               |
| NM_199025                                                                                  | <i>Zbtb26</i>                  | -2.231                       | 0.001782064 | zinc finger and BTB domain containing 26                                                                      |
| NM_029938                                                                                  | <i>H2afv</i>                   | -2.231                       | 2.76E-04    | H2A histone family, member V                                                                                  |
| NM_181394                                                                                  | <i>Anapc13</i>                 | -2.230                       | 3.62E-04    | anaphase promoting complex subunit 13                                                                         |
| NM_007556                                                                                  | <i>Bmp6</i>                    | -2.227                       | 0.006732636 | bone morphogenetic protein 6                                                                                  |
| NM_011663                                                                                  | <i>Zrsr1</i>                   | -2.224                       | 9.32E-04    | zinc finger (CCCH type), RNA binding motif and serine/arginine rich 1                                         |
| NM_007734                                                                                  | <i>Col4a3</i>                  | -2.216                       | 6.01E-04    | collagen, type IV, alpha 3                                                                                    |
| NM_001005341                                                                               | <i>Ypel2</i>                   | -2.215                       | 7.44E-04    | yippe-like 2 (Drosophila)                                                                                     |
| NM_001168304//NM_029522                                                                    | <i>Cdk19</i>                   | -2.215                       | 0.001378992 | cyclin-dependent kinase 19                                                                                    |
| NM_029522                                                                                  | <i>Gpsm2</i>                   | -2.212                       | 0.006340119 | G-protein signalling modulator 2 (AGS3-like, C. elegans)                                                      |
| NM_001199136//NM_001007596//NM_001114098//NM_001077696//NM_001025600//NM_027506//NM_009027 | <i>Macf1</i>                   | -2.210                       | 0.002325118 | microtubule-actin crosslinking factor 1                                                                       |
| NM_001007596//NM_001114098//NM_001077696//NM_001025600//NM_027506//NM_009027               | <i>Rasgrf2</i>                 | -2.208                       | 0.00232895  | RAS protein-specific guanine nucleotide-releasing factor 2                                                    |
| NM_001170537//NM_008385                                                                    | <i>Mef2c</i>                   | -2.207                       | 3.57E-04    | myocyte enhancer factor 2C                                                                                    |
| NM_008385                                                                                  | <i>Inpp5b</i>                  | -2.200                       | 6.98E-04    | inositol polyphosphate-5-phosphatase B                                                                        |
| NM_001277265//NM_001038609//NM_173368                                                      | <i>Tbxa2r</i>                  | -2.199                       | 0.001022452 | thromboxane A2 receptor                                                                                       |
| NM_001038609//NM_173368                                                                    | <i>Mapt</i>                    | -2.199                       | 2.76E-04    | microtubule-associated protein tau                                                                            |
| NM_173368                                                                                  | <i>Chd6</i>                    | -2.194                       | 0.001402105 | chromodomain helicase DNA binding protein 6                                                                   |
| NM_010019                                                                                  | <i>Dapk2</i>                   | -2.193                       | 3.72E-04    | death-associated protein kinase 2                                                                             |
| NM_001097621                                                                               | <i>Kif26a</i>                  | -2.193                       | 0.002006382 | kinesin family member 26A                                                                                     |
| NM_013657                                                                                  | <i>Sema3c</i>                  | -2.193                       | 3.82E-04    | sema domain, immunoglobulin domain (lg), short basic domain, secreted, (semaphorin) 3C                        |
| NM_001167997//NM_008409                                                                    | <i>Tex11</i>                   | -2.191                       | 0.006537725 | testis expressed gene 11                                                                                      |
| NM_008409                                                                                  | <i>Itm2a</i>                   | -2.190                       | 9.07E-04    | integral membrane protein 2A                                                                                  |
| NM_138628                                                                                  | <i>Txlnb</i>                   | -2.189                       | 0.004548972 | taxilin beta                                                                                                  |
| NM_007763                                                                                  | <i>Crip1</i>                   | -2.189                       | 3.05E-04    | cysteine-rich protein 1 (intestinal)                                                                          |
| NM_001033228                                                                               | <i>Itga1</i>                   | -2.188                       | 3.45E-04    | integrin alpha 1                                                                                              |
| NM_001025576                                                                               | <i>Ccdc141</i>                 | -2.187                       | 3.42E-04    | coiled-coil domain containing 141                                                                             |
| NM_001033240//NM_175324                                                                    | <i>Wjfd6a</i>                  | -2.183                       | 0.003178824 | WAP four-disulfide core domain 6A                                                                             |
| NM_175324                                                                                  | <i>Acad11</i>                  | -2.182                       | 0.005749376 | acyl-Coenzyme A dehydrogenase family, member 11                                                               |
| NR_015456                                                                                  | <i>D7Ert715e</i>               | -2.181                       | 5.53E-04    | DNA segment, Chr 7, ERATO Doi 715, expressed                                                                  |
| NM_008506                                                                                  | <i>Mycl1</i>                   | -2.180                       | 0.001349824 | v-myc myelocytomatosis viral oncogene homolog 1, lung carcinoma derived (avian)                               |
| NM_015775                                                                                  | <i>Tmprss2</i>                 | -2.175                       | 0.003464903 | transmembrane protease, serine 2                                                                              |
| NM_007554                                                                                  | <i>Bmp4</i>                    | -2.175                       | 8.38E-04    | bone morphogenetic protein 4                                                                                  |
| NM_001042752//NM_011436                                                                    | <i>Neo1</i>                    | -2.168                       | 6.77E-04    | neogenin                                                                                                      |
| NM_011436                                                                                  | <i>Sorl1</i>                   | -2.166                       | 1.82E-04    | sortilin-related receptor, LDLR class A repeats-containing                                                    |
| NM_026979                                                                                  | <i>C1qtnf2</i>                 | -2.166                       | 3.54E-04    | C1q and tumor necrosis factor related protein 2                                                               |
| NM_019419                                                                                  | <i>Arl6ip1</i>                 | -2.164                       | 8.13E-04    | ADP-ribosylation factor-like 6 interacting protein 1                                                          |
| NM_172467                                                                                  | <i>Zc3hav1</i>                 | -2.163                       | 9.72E-04    | zinc finger CCCH-type, antiviral 1-like                                                                       |
| NM_029870                                                                                  | <i>Crebrf</i>                  | -2.163                       | 0.001687169 | CREB3 regulatory factor                                                                                       |
| NM_001081087                                                                               | <i>Klhl41</i>                  | -2.162                       | 0.00179363  | kelch-like 41                                                                                                 |
| NM_001005740//NM_146162                                                                    | <i>Phactr1//Chst11</i>         | -2.162                       | 6.88E-04    | phosphatase and actin regulator 1//carbohydrate sulfotransferase 11                                           |
| NM_146162                                                                                  | <i>Tmem119</i>                 | -2.160                       | 0.002015146 | transmembrane protein 119                                                                                     |
| NM_001276481//NM_144552                                                                    | <i>Dag1</i>                    | -2.158                       | 0.001226607 | dystroglycan 1                                                                                                |
| NM_144552                                                                                  | <i>Stxbp6</i>                  | -2.158                       | 5.37E-04    | syntaxin binding protein 6 (amisyn)                                                                           |
| NM_028593                                                                                  | <i>Cybrd1</i>                  | -2.157                       | 5.58E-04    | cytochrome b reductase 1                                                                                      |
| NM_010181//XM_001111110//NM_001081490//NM_026347                                           | <i>Fbn2//LOC100047082</i>      | -2.157                       | 3.96E-04    | fibrillin 2//fibrillin-2-like                                                                                 |
| NM_001111110//NM_001081490//NM_026347                                                      | <i>Cmah</i>                    | -2.156                       | 2.83E-04    | cytidine monophospho-N-acetylneuraminic acid hydroxylase                                                      |
| NM_001081490//NM_026347                                                                    | <i>Fbxo9</i>                   | -2.155                       | 5.75E-04    | f-box protein 9                                                                                               |
| NM_026347                                                                                  | <i>Iah1</i>                    | -2.154                       | 8.94E-04    | isoamyl acetate-hydrolyzing esterase 1 homolog (S. cerevisiae)                                                |
| NM_001048204//NM_177351                                                                    | <i>Zfp455</i>                  | -2.152                       | 3.89E-04    | zinc finger protein 455                                                                                       |
| NM_177351                                                                                  | <i>Aghpd1</i>                  | -2.151                       | 9.07E-04    | aminoglycoside phosphotransferase domain containing 1                                                         |
| NM_030719                                                                                  | <i>Gatsl2</i>                  | -2.151                       | 0.004020363 | GATS protein-like 2                                                                                           |
| NM_008966                                                                                  | <i>Ptgif</i>                   | -2.149                       | 0.001810369 | prostaglandin F receptor                                                                                      |
| NM_139300                                                                                  | <i>Myik</i>                    | -2.149                       | 6.78E-04    | myosin, light polypeptide kinase                                                                              |
| NM_021715                                                                                  | <i>Chst7</i>                   | -2.148                       | 6.55E-04    | carbohydrate (N-acetylglucosamine) sulfotransferase 7                                                         |
| NM_013630                                                                                  | <i>Pkd1</i>                    | -2.146                       | 0.002438871 | polycystic kidney disease 1 homolog                                                                           |
| NM_001122952//NM_194336                                                                    | <i>Nfia</i>                    | -2.142                       | 2.83E-04    | nuclear factor I/A                                                                                            |
| NM_194336                                                                                  | <i>Gbp6</i>                    | -2.142                       | 0.001943574 | guanylate binding protein 6                                                                                   |
| NM_175432                                                                                  | <i>Tmem132c</i>                | -2.141                       | 0.004321892 | transmembrane protein 132C                                                                                    |
| NM_001160378//NM_026162                                                                    | <i>Fam46a</i>                  | -2.141                       | 7.77E-04    | family with sequence similarity 46, member A                                                                  |
| NM_026162                                                                                  | <i>Plxdc2</i>                  | -2.141                       | 9.29E-04    | plexin domain containing 2                                                                                    |
| NM_001038621//NM_001048179//NM_011372                                                      | <i>Rabgap1</i>                 | -2.141                       | 6.57E-04    | RAB GTPase activating protein 1-like                                                                          |
| NM_001048179//NM_011372                                                                    | <i>Ccl27a//Ccl27b//Gm13306</i> | -2.139                       | 4.46E-04    | chemokine (C-C motif) ligand 27A                                                                              |
| NM_011372                                                                                  | <i>St6galnac3</i>              | -2.139                       | 5.69E-04    | ST6 (alpha-N-acetyl-neuraminyl-2,3-beta-galactosyl-1,3)-N-acetylgalactosaminide alpha-2,6-sialyltransferase 3 |
| NM_025654                                                                                  | <i>Rdm1</i>                    | -2.137                       | 0.004303742 | RAD52 motif 1                                                                                                 |
| NM_021422                                                                                  | <i>Dnaja4</i>                  | -2.136                       | 0.00336258  | DnaJ (Hsp40) homolog, subfamily A, member 4                                                                   |

| RefSeq Transcript ID                        | Gene Symbol                 | *FC (Air vs O <sub>2</sub> ) | p (Corr)    | Gene Title                                                                                            |
|---------------------------------------------|-----------------------------|------------------------------|-------------|-------------------------------------------------------------------------------------------------------|
| NM_007382                                   | <b>Acadm</b>                | -2.134                       | 9.00E-04    | acyl-Coenzyme A dehydrogenase, medium chain                                                           |
| NM_001134457                                | <b>Nxpe3</b>                | -2.134                       | 2.89E-04    | neuralexophilin and PC-esterase domain family, member 3                                               |
| NM_026385                                   | <b>Plip</b>                 | -2.133                       | 0.001428592 | plasma membrane proteolipid                                                                           |
| NM_028977                                   | <b>Lrrc17</b>               | -2.133                       | 9.03E-04    | leucine rich repeat containing 17                                                                     |
| NM_001177995///N Prdm16                     |                             | -2.133                       | 0.001119699 | PR domain containing 16                                                                               |
| NM_023055///NM_Slc9a3r2                     |                             | -2.132                       | 0.00129915  | solute carrier family 9 (sodium/hydrogen exchanger), member 3 regulator 2                             |
| NM_001136236///N Fcrl1                      |                             | -2.131                       | 4.02E-04    | Fc receptor-like 1                                                                                    |
| NM_212457                                   | <b>Bex4</b>                 | -2.125                       | 0.003246647 | brain expressed gene 4                                                                                |
| NM_001037743///X 4921506M07Rik///Ttc6       |                             | -2.125                       | 0.002968934 | RIKEN cDNA 4921506M07 gene///tetratricopeptide repeat domain 6                                        |
| NR_001461                                   | <b>Kcnq1ot1</b>             | -2.123                       | 0.001936572 | KCNQ1 overlapping transcript 1                                                                        |
| NM_010745                                   | <b>Ly86</b>                 | -2.123                       | 0.008698097 | lymphocyte antigen 86                                                                                 |
| NM_212445                                   | <b>Kdelc2</b>               | -2.120                       | 0.001025225 | KDEL (Lys-Asp-Glu-Leu) containing 2                                                                   |
| NM_178934                                   | <b>Slc2a12</b>              | -2.119                       | 0.009670761 | solute carrier family 2 (facilitated glucose transporter), member 12                                  |
| NM_008835///NR_C Phxr4                      |                             | -2.119                       | 5.01E-04    | per-hexamer repeat gene 4                                                                             |
| NM_010952                                   | <b>Oaz2</b>                 | -2.118                       | 5.17E-04    | ornithine decarboxylase antizyme 2                                                                    |
| NM_145525                                   | <b>Osbpl6</b>               | -2.116                       | 0.003165932 | oxysterol binding protein-like 6                                                                      |
| NM_008584                                   | <b>Meox2</b>                | -2.115                       | 7.06E-04    | mesenchyme homeobox 2                                                                                 |
| NM_011402                                   | <b>Slc34a2</b>              | -2.113                       | 0.002794191 | solute carrier family 34 (sodium phosphate), member 2                                                 |
| NM_008737                                   | <b>Nrp1</b>                 | -2.113                       | 3.88E-04    | neuropilin 1                                                                                          |
| NM_172900                                   | <b>Siglec9</b>              | -2.113                       | 0.0096586   | sialic acid binding Ig-like lectin G                                                                  |
| NM_001033251///N Gpr174                     |                             | -2.111                       | 0.005344273 | G protein-coupled receptor 174                                                                        |
| NM_001024950                                | <b>Zfp563</b>               | -2.107                       | 5.53E-04    | zinc finger protein 563                                                                               |
| NM_024437///NM_Nudt7                        |                             | -2.107                       | 0.002114211 | nudix (nucleoside diphosphate linked moiety X)-type motif 7                                           |
| NM_011158                                   | <b>Prkar2b</b>              | -2.106                       | 0.007640117 | protein kinase, cAMP dependent regulatory, type II beta                                               |
| NM_001033257///N Phacr2                     |                             | -2.106                       | 3.29E-04    | phosphatase and actin regulator 2                                                                     |
| NM_001145826///N Specc1l                    |                             | -2.103                       | 0.001430434 | sperm antigen with calponin homology and coiled-coil domains 1-like                                   |
| NM_053195                                   | <b>Slc24a3</b>              | -2.103                       | 0.001356925 | solute carrier family 24 (sodium/potassium/calcium exchanger), member 3                               |
| NM_001042489///N Hvcn1                      |                             | -2.099                       | 0.001810649 | hydrogen voltage-gated channel 1                                                                      |
| NM_011250                                   | <b>Rbl2</b>                 | -2.099                       | 0.002817239 | retinoblastoma-like 2                                                                                 |
| NM_016753                                   | <b>Lxn</b>                  | -2.097                       | 0.004395806 | latexin                                                                                               |
| NM_008514                                   | <b>2210419D22Rik///Lrp6</b> | -2.093                       | 7.81E-04    | RIKEN cDNA 2210419D22 gene///low density lipoprotein receptor-related protein 6                       |
| NM_194334                                   | <b>Tbc1d2b</b>              | -2.092                       | 0.001750872 | TBC1 domain family, member 2B                                                                         |
| NM_001077410///N Gimap8                     |                             | -2.092                       | 2.82E-04    | GTPase, IMAP family member 8                                                                          |
| NM_001172424///N Dhrs3                      |                             | -2.092                       | 0.001541005 | dehydrogenase/reductase (SDR family) member 3                                                         |
| NM_010648///NM_Klra3///Klra9///LOC1008624   |                             | -2.091                       | 0.002426628 | killer cell lectin-like receptor, subfamily A, member 3                                               |
| NM_019516                                   | <b>Lgals12</b>              | -2.090                       | 0.00232895  | lectin, galactose binding, soluble 12                                                                 |
| NM_013548///NM_Hist1h3b///Hist1h3c///Hist1h |                             | -2.089                       | 0.004167333 | histone cluster 1, H3b                                                                                |
| NM_010279                                   | <b>Gfra1</b>                | -2.087                       | 0.008463806 | glial cell line derived neurotrophic factor family receptor alpha 1                                   |
| NM_009640                                   | <b>Angpt1</b>               | -2.087                       | 6.59E-04    | angiopoietin 1                                                                                        |
| NM_027878                                   | <b>Dram1</b>                | -2.086                       | 8.64E-04    | DNA-damage regulated autophagy modulator 1                                                            |
| NM_001267622///N Ttc28                      |                             | -2.086                       | 9.10E-04    | tetratricopeptide repeat domain 28                                                                    |
| NM_133229                                   | <b>Ripply3</b>              | -2.085                       | 0.002715577 | rippy3 homolog (zebrafish)                                                                            |
| NM_172628                                   | <b>Sh3tc2</b>               | -2.084                       | 0.005366257 | SH3 domain and tetratricopeptide repeats 2                                                            |
| NM_175013                                   | <b>Pgm5</b>                 | -2.084                       | 0.007678451 | phosphoglucomutase 5                                                                                  |
| NM_017367                                   | <b>Ccni</b>                 | -2.082                       | 6.03E-04    | cyclin I                                                                                              |
| NM_009223                                   | <b>Snn</b>                  | -2.081                       | 0.00154566  | stannin                                                                                               |
| NM_019975                                   | <b>Hacl1</b>                | -2.079                       | 7.45E-04    | 2-hydroxyacyl-CoA lyase 1                                                                             |
| NM_026046                                   | <b>Zfp329</b>               | -2.078                       | 7.18E-04    | zinc finger protein 329                                                                               |
| NM_001082414///N Sh3d19                     |                             | -2.077                       | 0.0075961   | SH3 domain protein D19                                                                                |
| NM_175526                                   | <b>Clec1a</b>               | -2.075                       | 0.004526648 | C-type lectin domain family 1, member a                                                               |
| NM_001195084///N Plscr2                     |                             | -2.074                       | 4.49E-04    | phospholipid scramblase 2                                                                             |
| NM_001083922///N Wbp1                       |                             | -2.073                       | 9.32E-04    | WW domain binding protein 1                                                                           |
| NM_177899                                   | <b>Zfp866</b>               | -2.073                       | 7.78E-04    | zinc finger protein 866                                                                               |
| NM_001122899///N Lepr                       |                             | -2.073                       | 0.00155429  | leptin receptor                                                                                       |
| NM_009856                                   | <b>Cd83</b>                 | -2.072                       | 6.77E-04    | CD83 antigen                                                                                          |
| NM_146115                                   | <b>Tor4a</b>                | -2.072                       | 0.00347863  | torsin family 4, member A                                                                             |
| NM_001081499                                | <b>Tbc1d8b</b>              | -2.072                       | 5.37E-04    | TBC1 domain family, member 8B                                                                         |
| NM_013626                                   | <b>Pam</b>                  | -2.072                       | 0.003868885 | peptidylglycine alpha-amidating monooxygenase                                                         |
| NM_031874                                   | <b>Rab3d</b>                | -2.071                       | 5.17E-04    | RAB3D, member RAS oncogene family                                                                     |
| NM_019440                                   | <b>Irgm2</b>                | -2.070                       | 0.003892792 | immunity-related GTPase family M member 2                                                             |
| NM_001014995                                | <b>Fam189b</b>              | -2.069                       | 6.17E-04    | family with sequence similarity 189, member B                                                         |
| NM_018881                                   | <b>Fmo2</b>                 | -2.069                       | 3.41E-04    | flavin containing monooxygenase 2                                                                     |
| NM_010612                                   | <b>Kdr</b>                  | -2.069                       | 0.001425611 | kinase insert domain protein receptor                                                                 |
| NM_001099738///N Dnajc28                    |                             | -2.068                       | 2.83E-04    | DnaJ (Hsp40) homolog, subfamily C, member 28                                                          |
| NM_011246                                   | <b>Rasgrp1</b>              | -2.068                       | 0.001742034 | RAS guanyl releasing protein 1                                                                        |
| NM_021455                                   | <b>Mxipl</b>                | -2.068                       | 0.009639582 | MLX interacting protein-like                                                                          |
| NM_010746                                   | <b>Ncr1</b>                 | -2.068                       | 6.02E-04    | natural cytotoxicity triggering receptor 1                                                            |
| NM_001042605///N Cd74                       |                             | -2.067                       | 0.002405635 | CD74 antigen (invariant polypeptide of major histocompatibility complex, class II antigen-associated) |
| NM_008206                                   | <b>H2-Oa</b>                | -2.067                       | 0.003849075 | histocompatibility 2, O region alpha locus                                                            |
| NM_001111060///N Cd59a                      |                             | -2.066                       | 7.61E-04    | CD59a antigen                                                                                         |
| NM_153533                                   | <b>Tenc1</b>                | -2.066                       | 0.003914276 | tensin like C1 domain-containing phosphatase                                                          |
| NM_026514                                   | <b>Cdc42ep3</b>             | -2.065                       | 2.44E-04    | CDC42 effector protein (Rho GTPase binding) 3                                                         |
| NM_198967                                   | <b>Tmtc1</b>                | -2.064                       | 5.11E-04    | transmembrane and tetratricopeptide repeat containing 1                                               |
| NM_010378                                   | <b>H2-Aa</b>                | -2.064                       | 0.00232895  | histocompatibility 2, class II antigen A, alpha                                                       |
| NM_001172216///N Fam221a                    |                             | -2.063                       | 6.75E-04    | family with sequence similarity 221, member A                                                         |
|                                             | <b>Trav9d-3</b>             | -2.062                       | 0.005751283 | T cell receptor alpha variable 9D-3                                                                   |
| NM_008518                                   | <b>Ltb</b>                  | -2.062                       | 0.006886334 | lymphotoxin B                                                                                         |
| NM_012033                                   | <b>Tinag</b>                | -2.061                       | 2.18E-04    | tubulointerstitial nephritis antigen                                                                  |
| NM_001048179///N Ccl27a///Ccl27b///Gm13306/ |                             | -2.059                       | 5.01E-04    | chemokine (C-C motif) ligand 27A                                                                      |
| NM_133670                                   | <b>Sult1a1</b>              | -2.059                       | 0.005167726 | sulfotransferase family 1A, phenol-preferring, member 1                                               |
| NM_175291                                   | <b>Dock10</b>               | -2.058                       | 0.006494219 | dedicator of cytokinesis 10                                                                           |
| NM_011159                                   | <b>Prkdc</b>                | -2.055                       | 9.36E-04    | protein kinase, DNA activated, catalytic polypeptide                                                  |
| NM_023053                                   | <b>Twsg1</b>                | -2.054                       | 5.64E-04    | twisted gastrulation homolog 1 (Drosophila)                                                           |

| RefSeq Transcript ID | Gene Symbol          | *FC (Air vs O <sub>2</sub> ) | p (Corr)    | Gene Title                                                                                     |
|----------------------|----------------------|------------------------------|-------------|------------------------------------------------------------------------------------------------|
| NM_001004359         | <b>Gprasp1</b>       | -2.053                       | 8.05E-04    | G protein-coupled receptor associated sorting protein 1                                        |
| NM_028372            | <b>Mblac2</b>        | -2.049                       | 0.001120056 | metallo-beta-lactamase domain containing 2                                                     |
| NM_001033167         | <b>Slc22a23</b>      | -2.049                       | 6.98E-04    | solute carrier family 22, member 23                                                            |
| NM_010231            | <b>Fmo1</b>          | -2.048                       | 0.00225009  | flavin containing monooxygenase 1                                                              |
| NM_001001183         | <b>Tmem204</b>       | -2.041                       | 3.45E-04    | transmembrane protein 204                                                                      |
| NM_018815            | <b>Nup210</b>        | -2.041                       | 0.003026003 | nucleoporin 210                                                                                |
| NM_021462            | <b>Mknk2</b>         | -2.040                       | 6.37E-04    | MAP kinase-interacting serine/threonine kinase 2                                               |
| NM_028375            | <b>Cx1c</b>          | -2.040                       | 0.002260302 | CAAX box 1C                                                                                    |
| NM_080285            | <b>Cttnbp2</b>       | -2.040                       | 4.41E-04    | cortactin binding protein 2                                                                    |
| NM_001163290         | <b>Adck3</b>         | -2.038                       | 0.002078079 | aarF domain containing kinase 3                                                                |
| NM_019697            | <b>Kcnd2</b>         | -2.037                       | 0.003096426 | potassium voltage-gated channel, Shal-related family, member 2                                 |
| NM_001163394         | <b>Evl</b>           | -2.032                       | 8.84E-04    | Ena-vasodilator stimulated phosphoprotein                                                      |
| NM_080595            | <b>Emid1</b>         | -2.026                       | 0.003389474 | EMI domain containing 1                                                                        |
| NM_018874            | <b>Pnliprp1</b>      | -2.026                       | 0.005315011 | pancreatic lipase related protein 1                                                            |
| NM_019730            | <b>Mrps34</b>        | -2.025                       | 8.82E-04    | mitochondrial ribosomal protein S34                                                            |
| NM_027924            | <b>Pdgfd</b>         | -2.025                       | 0.004660305 | platelet-derived growth factor, D polypeptide                                                  |
| NM_008957            | <b>Ptch1</b>         | -2.025                       | 6.66E-04    | patched homolog 1                                                                              |
| NM_178920            | <b>Mal2</b>          | -2.024                       | 0.002829249 | mal, T cell differentiation protein 2                                                          |
| NM_133821            | <b>Phlpp1</b>        | -2.024                       | 8.95E-04    | PH domain and leucine rich repeat protein phosphatase 1                                        |
| NM_182995            | <b>Ccp110</b>        | -2.023                       | 0.00394273  | centriolar coiled coil protein 110                                                             |
| NM_011056            | <b>Pde4d</b>         | -2.023                       | 0.001086998 | phosphodiesterase 4D, cAMP specific                                                            |
| NM_011828            | <b>Hs2t1</b>         | -2.022                       | 9.16E-04    | heparan sulfate 2-O-sulfotransferase 1                                                         |
| NM_001159538         | <b>Fgd2</b>          | -2.020                       | 0.001198963 | FYVE, RhoGEF and PH domain containing 2                                                        |
| NM_053090            | <b>Fam126a</b>       | -2.020                       | 0.001605911 | family with sequence similarity 126, member A                                                  |
| NM_025476            | <b>Rmdn1</b>         | -2.019                       | 2.64E-04    | regulator of microtubule dynamics 1                                                            |
| NM_001039530         | <b>Parp14</b>        | -2.017                       | 3.96E-04    | poly (ADP-ribose) polymerase family, member 14                                                 |
| NM_001033122         | <b>Cd69</b>          | -2.016                       | 0.009130292 | CD69 antigen                                                                                   |
| NM_183028            | <b>Pcmtd1</b>        | -2.014                       | 7.69E-04    | protein-L-isopartate (D-aspartate) O-methyltransferase domain containing 1                     |
| NM_019641            | <b>Gm11223</b>       | -2.013                       | 0.003239767 | stathmin 1 pseudogene                                                                          |
| NM_010636            | <b>Klf12</b>         | -2.013                       | 4.34E-04    | Kruppel-like factor 12                                                                         |
| NM_023580            | <b>Epha1</b>         | -2.013                       | 3.05E-04    | Eph receptor A1                                                                                |
| NM_010102            | <b>S1pr4</b>         | -2.012                       | 2.72E-04    | sphingosine-1-phosphate receptor 4                                                             |
| NM_010225            | <b>Foxf2</b>         | -2.011                       | 0.001269162 | forkhead box F2                                                                                |
| NM_001113549         | <b>Ltbp4</b>         | -2.009                       | 0.003891582 | latent transforming growth factor beta binding protein 4                                       |
| NM_001166597         | <b>Dgkz</b>          | -2.009                       | 2.83E-04    | diacylglycerol kinase zeta                                                                     |
| NM_172694            | <b>Megf9</b>         | -2.009                       | 0.001378605 | multiple EGF-like-domains 9                                                                    |
| NM_028064            | <b>Slc39a4</b>       | -2.007                       | 0.00355201  | solute carrier family 39 (zinc transporter), member 4                                          |
| NM_001038999         | <b>Atp8a1</b>        | -2.007                       | 9.30E-04    | ATPase, aminophospholipid transporter (APLT), class I, type 8A, member 1                       |
| NM_028194            | <b>Fryl</b>          | -2.006                       | 2.85E-04    | furry homolog-like (Drosophila)                                                                |
| NM_013548            | <b>Hist1h3b</b>      | -2.006                       | 0.005660404 | histone cluster 1, H3b                                                                         |
| NM_025421            | <b>Acyp1</b>         | -2.006                       | 0.002303129 | acylphosphatase 1, erythrocyte (common) type                                                   |
| NM_001253857         | <b>Tet1</b>          | -2.005                       | 0.001057821 | tet methylcytosine dioxygenase 1                                                               |
| NM_026700            | <b>Dopey2</b>        | -2.002                       | 5.85E-04    | dopey family member 2                                                                          |
| NM_009275            | <b>Srprb</b>         | -2.001                       | 0.004879819 | signal recognition particle receptor, B subunit                                                |
| NM_177561            | <b>Usp46</b>         | -2.000                       | 0.001245336 | ubiquitin specific peptidase 46                                                                |
| NM_001110826         | <b>Ddx6</b>          | -1.998                       | 0.003629632 | DEAD (Asp-Glu-Ala-Asp) box polypeptide 6                                                       |
| NM_026420            | <b>Paip2</b>         | -1.998                       | 3.67E-04    | polyadenylate-binding protein-interacting protein 2                                            |
| NM_001252584         | <b>Zmynd8</b>        | -1.997                       | 3.12E-04    | zinc finger, MYND-type containing 8                                                            |
| NM_001081278         | <b>Tbc1d4</b>        | -1.996                       | 0.001899942 | TBC1 domain family, member 4                                                                   |
| NM_001252094         | <b>Mettl20</b>       | -1.995                       | 0.001537402 | methyltransferase like 20                                                                      |
| NM_175437            | <b>Gsap</b>          | -1.995                       | 0.006752007 | gamma-secretase activating protein                                                             |
| NM_177231            | <b>Arb1</b>          | -1.992                       | 0.001134317 | arrestin, beta 1                                                                               |
| NM_001159289         | <b>Bcl11a</b>        | -1.991                       | 9.90E-04    | B cell CLL/lymphoma 11A (zinc finger protein)                                                  |
| NM_178061            | <b>Mob3b</b>         | -1.990                       | 5.49E-04    | MOB kinase activator 3B                                                                        |
| NM_001172154         | <b>Dnase1l1</b>      | -1.990                       | 5.01E-04    | deoxyribonuclease 1-like 1                                                                     |
| NM_001199296         | <b>Acly</b>          | -1.989                       | 8.05E-04    | ATP citrate lyase                                                                              |
| NM_001205253         | <b>Thsd1</b>         | -1.989                       | 0.002794191 | thrombospondin, type I, domain 1                                                               |
| NM_008514            | <b>2210419D22Rik</b> | -1.989                       | 6.66E-04    | RIKEN cDNA 2210419D22 gene                                                                     |
| NM_001037842         | <b>Cml3</b>          | -1.988                       | 0.001996096 | camello-like 3                                                                                 |
| NM_001002268         | <b>Gpr126</b>        | -1.987                       | 6.71E-04    | G protein-coupled receptor 126                                                                 |
| NM_021299            | <b>Ak3</b>           | -1.984                       | 0.002691781 | adenylate kinase 3                                                                             |
| NM_011946            | <b>Map3k2</b>        | -1.984                       | 0.001867556 | mitogen-activated protein kinase kinase kinase 2                                               |
| NR_045164            | <b>Slc2a4rg-ps</b>   | -1.984                       | 0.002401592 | Slc2a4 regulator, pseudogene                                                                   |
| NM_178407            | <b>Arap2</b>         | -1.984                       | 0.002790515 | ArfGAP with RhoGAP domain, ankyrin repeat and PH domain 2                                      |
| NM_028713            | <b>Rftn2</b>         | -1.982                       | 7.59E-04    | raftlin family member 2                                                                        |
| NM_001044720         | <b>Abcc9</b>         | -1.981                       | 0.007997302 | ATP-binding cassette, sub-family C (CFTR/MRP), member 9                                        |
| NM_001243199         | <b>Gimap4</b>        | -1.980                       | 3.17E-04    | GTPase, IMAP family member 4                                                                   |
| NM_021356            | <b>Gab1</b>          | -1.980                       | 2.98E-04    | growth factor receptor bound protein 2-associated protein 1                                    |
| NM_177839            | <b>Tnn</b>           | -1.979                       | 3.52E-04    | tenascin N                                                                                     |
| NM_001039509         | <b>Pnkd</b>          | -1.978                       | 0.001177222 | paroxysmal nonkinesigenic dyskinesia                                                           |
| NM_027326            | <b>Mllt3</b>         | -1.978                       | 4.56E-04    | myeloid/lymphoid or mixed-lineage leukemia (trithorax homolog, Drosophila); translocated to, 3 |
| NM_001114328         | <b>Ccpg1</b>         | -1.977                       | 5.32E-04    | cell cycle progression 1                                                                       |
| NM_011226            | <b>Rab19</b>         | -1.977                       | 5.56E-04    | RAB19, member RAS oncogene family                                                              |
| NM_145412            | <b>Chtf8</b>         | -1.977                       | 0.004879819 | CTF8, chromosome transmission fidelity factor 8                                                |
| NM_001277106         | <b>Crjf3</b>         | -1.974                       | 5.36E-04    | cytokine receptor-like factor 3                                                                |
| NM_009238            | <b>Sox4</b>          | -1.973                       | 0.003689988 | SRY-box containing gene 4                                                                      |
| NM_133218            | <b>Zfp704</b>        | -1.971                       | 8.93E-04    | zinc finger protein 704                                                                        |
| NM_009128            | <b>Scd2</b>          | -1.969                       | 0.001899942 | stearoyl-Coenzyme A desaturase 2                                                               |
| NM_138742            | <b>Nap1l3</b>        | -1.969                       | 0.004871914 | nucleosome assembly protein 1-like 3                                                           |
| NM_001170848         | <b>LOC100861853</b>  | -1.969                       | 0.006276889 | uncharacterized LOC100861853                                                                   |
| NM_001080819         | <b>Arid1a</b>        | -1.968                       | 9.61E-04    | AT rich interactive domain 1A (SWI-like)                                                       |
| NM_001004363         | <b>Nuak1</b>         | -1.967                       | 4.16E-04    | NUAK family, SNF1-like kinase, 1                                                               |
| NM_001079883         | <b>Bcl11b</b>        | -1.967                       | 0.00119185  | B cell leukemia/lymphoma 11B                                                                   |

| RefSeq Transcript ID | Gene Symbol              | *FC (Air vs O <sub>2</sub> ) | p (Corr)    | Gene Title                                                            |
|----------------------|--------------------------|------------------------------|-------------|-----------------------------------------------------------------------|
| NM_133838            | <b>Ehd4</b>              | -1.966                       | 0.001274417 | EH-domain containing 4                                                |
| NM_001033633         | <b>Slc2a13</b>           | -1.966                       | 0.009415985 | solute carrier family 2 (facilitated glucose transporter), member 13  |
| NM_001081014///N     | <b>Dennd4c</b>           | -1.964                       | 4.66E-04    | DENN/MADD domain containing 4C                                        |
| NM_009712            | <b>Arsb</b>              | -1.963                       | 0.006347864 | arylsulfatase B                                                       |
|                      | <b>Igk1///Iglv1</b>      | -1.963                       | 0.001311582 | immunoglobulin lambda constant 1///immunoglobulin lambda variable 1   |
| NM_010153            | <b>ErbB3</b>             | -1.962                       | 0.001628247 | v-erb-b2 erythroblastic leukemia viral oncogene homolog 3 (avian)     |
| NM_001164557///N     | <b>Pdzk1ip1</b>          | -1.962                       | 0.001399721 | PDZK1 interacting protein 1                                           |
| NM_008149            | <b>Gpam</b>              | -1.959                       | 2.94E-04    | glycerol-3-phosphate acyltransferase, mitochondrial                   |
| NM_153590            | <b>Klre1</b>             | -1.959                       | 5.58E-04    | killer cell lectin-like receptor family E member 1                    |
| NM_028841            | <b>Tspan17</b>           | -1.958                       | 0.001372295 | tetraspanin 17                                                        |
|                      | <b>Tcrg-C1///Tcrg-C2</b> | -1.957                       | 0.003593694 | T cell receptor gamma, constant 1///T-cell receptor gamma, constant 2 |
| NM_001110253///N     | <b>Fyco1</b>             | -1.957                       | 4.56E-04    | FYVE and coiled-coil domain containing 1                              |
| NM_001082485///N     | <b>Zfp266</b>            | -1.956                       | 0.00119982  | zinc finger protein 266                                               |
| NM_001163608///N     | <b>Plxdc1</b>            | -1.955                       | 3.54E-04    | plexin domain containing 1                                            |
| NM_010174            | <b>Fabp3</b>             | -1.955                       | 0.004088384 | fatty acid binding protein 3, muscle and heart                        |
| NM_175251            | <b>Arid2</b>             | -1.954                       | 0.001044687 | AT rich interactive domain 2 (ARID, RFX-like)                         |
| NM_001079686///N     | <b>Syne1</b>             | -1.954                       | 0.001384595 | spectrin repeat containing, nuclear envelope 1                        |
| NM_027294            | <b>Cmtm8</b>             | -1.954                       | 0.009374986 | CKLF-like MARVEL transmembrane domain containing 8                    |
| NM_172630            | <b>Mppe1</b>             | -1.953                       | 0.001158827 | metallophosphoesterase 1                                              |
| NM_025760            | <b>Ptplad2</b>           | -1.952                       | 0.009038386 | protein tyrosine phosphatase-like A domain containing 2               |
| NM_053262            | <b>Hsd17b11</b>          | -1.949                       | 0.002183938 | hydroxysteroid (17-beta) dehydrogenase 11                             |
| NM_018854            | <b>Ift20</b>             | -1.949                       | 6.29E-04    | intraflagellar transport 20                                           |
| NM_001204134///N     | <b>C1qtnf3</b>           | -1.948                       | 0.009551567 | C1q and tumor necrosis factor related protein 3                       |
| NM_011383            | <b>Six5</b>              | -1.948                       | 0.001234603 | sine oculis-related homeobox 5                                        |
| NM_001164275///N     | <b>Prrg1</b>             | -1.945                       | 0.00220432  | proline rich Gla (G-carboxyglutamic acid) 1                           |
| NM_001177945///N     | <b>AamdC</b>             | -1.945                       | 0.004676728 | adipogenesis associated Mth938 domain containing                      |

**Table E6. Pathway analysis of Nrf2-dependently changed lung genes by hyperoxia (n = 816, P < 0.01 2-Way ANOVA).**

**A. Top networks**

|          | <b>Genes (SFN-altered in bold)</b>                                                                                                                                               | <b>Score</b> | <b>Disease and Functions</b>                                                                              |
|----------|----------------------------------------------------------------------------------------------------------------------------------------------------------------------------------|--------------|-----------------------------------------------------------------------------------------------------------|
| <b>1</b> | <i>Acox1, Adh7, Akap5, Cat, Cbr1, Ces1g, Coq7, Gstp1, Hcls1, Kcnk2, Kcnmb4, Keap1, Khdrbs3, Metrnl, Msr1, Nfe2l2, Nqo1, Pgd, Psm5, Slc1a1, Spr, Srxn1, Sub1</i>                  | 35           | Cellular Movement, Immune Cell Trafficking, Dermatological Diseases and Conditions                        |
| <b>2</b> | <i>Adamts15, Appl2, Axin2, Ccl7, Cd44, Cxcl12, Fhl2, Frat1, Hey1, Ipo5, Jag1, Kctd10, Klf15, Myo6, Nme2, Pdlim2, Prrx1, Rbpj, Rhob, Rnf146, Rspo3, Rtn4rl2, Tgfb1, Tnc, Vcan</i> | 34           | Cell-To-Cell Signaling and Interaction, Cellular Movement, Cardiovascular System Development and Function |
| <b>3</b> | <i>Cald1, Cd93, Cdk1, Ckap2, Dkc1, Gar1, Hmbox1, Kif11, Kif22, Kif4a, Ncapg, Nusap1, Pink1, Polr1b, Polr1e, Reps2, Rfwd3, Rrm2, Sele, Ssr1, Taf12, Taf1c, Thbd, Wdr12</i>        | 33           | DNA Replication, Recombination, and Repair, Cell Cycle, Cellular Movement                                 |
| <b>4</b> | <i>Angpt1, Apex1, Birc5, Cdr2, Cdt1, Cenpa, Col5a2, Dclre1c, Dst, Hlcs, Limd1, Mcm5, Mms22l, Neo1, Nlrp3, Pole, Pole2, Psm10, Rad50, Rec8, Rfc3, Rfc4, Sema3c, Tfdp1</i>         | 33           | DNA Replication, Recombination, and Repair, Cancer, Gastrointestinal Disease                              |

**B. Top upstream regulators**

| <b>Regulators</b>  | <b>Molecule Type</b>    | <b>Predicted Activation State</b> | <b>p</b> |
|--------------------|-------------------------|-----------------------------------|----------|
| Lipopolysaccharide | chemical drug           | Activated                         | 1.35E-12 |
| <i>Csf2</i>        | cytokine                | Activated                         | 8.94E-11 |
| <i>Tgfb1</i>       | growth factor           | Activated                         | 4.04E-09 |
| <i>Nfe2l2</i>      | transcription regulator | Inhibited                         | 5.33E-09 |
| IL-17A             | cytokine                | Activated                         | 7.55E-09 |
| <i>Tnf</i>         | cytokine                | Activated                         | 9.11E-09 |
| STAT3              | transcription regulator | Activated                         | 1.11E-07 |

**C. Top canonical pathways**

| <b>Pathway</b>                                                                 | <b>-Log(p)</b> | <b>Genes</b>                                                                                                                                                |
|--------------------------------------------------------------------------------|----------------|-------------------------------------------------------------------------------------------------------------------------------------------------------------|
| phagosome formation                                                            | 6.41           | <i>Rhoh, Plcd4, Fcgr1a, Msr1, Fcgr2a, Pik3cg, Tlr4, Syk, Fcgr2b, Rhob, Tlr13, Plcg1, Plcl2, Rnd3, Pik3c3</i>                                                |
| NRF2-mediated Oxidative Stress Response                                        | 5.01           | <i>Gsta3, Gclc, Dnajc13, Cbr1, Sod1, Txnrd1, Nqo1, Enc1, Pik3cg, Cct7, Gstm5, Gsr, Cat, Gstp1, Keap1, Gclm, Pik3c3, Nfe2l2</i>                              |
| Role of Macrophages, Fibroblasts and Endothelial Cells in Rheumatoid Arthritis | 3.88           | <i>Cxcl12, Osm, Plcd4, Jak2, Fcgr1a, Fgf2, Sele, Rock2, Irak3, Pik3cg, Tlr4, Ikbkg, Il17ra, Nos2, C5ar1, Tlr13, Plcg1, Plcl2, Traf1, Mif, Vegfc, Pik3c3</i> |
| TREM1 Signaling                                                                | 2.99           | <i>Tlr4, Lat2, Fcgr2b, Jak2, Nlrp3, Tlr13, Plcg1, Cd86</i>                                                                                                  |
| Dendritic Cell Maturation                                                      | 2.98           | <i>Plcd4, Jak2, Fcgr1a, Fcgr2a, Pik3cg, Tlr4, Ikbkg, Fcgr2b, Cd80, Plcg1, Plcl2, Cd86, Pik3c3</i>                                                           |
| Superoxide Radicals Degradation                                                | 2.76           | <i>Cat, Sod1, Nqo1</i>                                                                                                                                      |
| Sphingosine-1-phosphate Signaling                                              | 2.72           | <i>Rhoh, Plcd4, Rhob, Plcg1, Plcl2, Rnd3, Adcy9, Pik3c3, Slpr5, Pik3cg</i>                                                                                  |

**Table E7. Nrf2+/- mice: Pretreatment and Exposure 264 genes**

2-WAY ANOVA (Benjamini-Hochberg Correction, p-value cut-off: 0.05)

\*Fold change (FC) in red incates increased and in blue decreased by SFN, compared to PBS, after O2 exposure.

| RefSeq                      | Transcript | ID | p        | (Pretreatment-Exposure) | FC   | - O2:PBS vs O2:SFN | Gene Symbol                  |
|-----------------------------|------------|----|----------|-------------------------|------|--------------------|------------------------------|
| NM_008949                   |            |    | 9.25E-05 |                         | 3.16 |                    | <i>Psmc3ip</i>               |
| XM_144292//XM_914571        |            |    | 1.18E-04 |                         | 2.71 |                    | <i>Tmem156</i>               |
| NM_001161515//NM_001161515  |            |    | 4.46E-04 |                         | 2.65 |                    | <i>Dctd</i>                  |
| NM_013762//XM_00147575      |            |    | 1.04E-04 |                         | 2.65 |                    | <i>Gm12816//Gm5879//f</i>    |
| NR_002904//NR_003270        |            |    | 3.34E-04 |                         | 2.16 |                    | <i>Snhg3</i>                 |
| NM_026993                   |            |    | 2.39E-05 |                         | 2.08 |                    | <i>Ddah1</i>                 |
| NM_175406                   |            |    | 4.49E-04 |                         | 1.89 |                    | <i>Atp6v0d2</i>              |
| NM_178403                   |            |    | 1.03E-04 |                         | 1.85 |                    | <i>Pus7</i>                  |
| NM_001142943//NM_001142943  |            |    | 6.01E-05 |                         | 1.82 |                    | <i>Zfp949</i>                |
| NM_001177843//NM_001177843  |            |    | 3.31E-04 |                         | 1.67 |                    | <i>Frdm4a</i>                |
| NM_145930                   |            |    | 4.75E-04 |                         | 1.67 |                    | <i>AW549877</i>              |
| NM_001159317//NM_001159317  |            |    | 2.82E-04 |                         | 1.66 |                    | <i>Il1rap</i>                |
| NM_015754                   |            |    | 1.15E-04 |                         | 1.65 |                    | <i>Rbbp9</i>                 |
| NM_007901                   |            |    | 2.50E-04 |                         | 1.65 |                    | <i>S1pr1</i>                 |
| NM_008517                   |            |    | 3.86E-05 |                         | 1.65 |                    | <i>Lta4h</i>                 |
| NM_010167                   |            |    | 2.74E-04 |                         | 1.62 |                    | <i>Eya4</i>                  |
| NM_025447                   |            |    | 4.50E-05 |                         | 1.62 |                    | <i>Dimt1</i>                 |
| NM_025635                   |            |    | 1.21E-04 |                         | 1.62 |                    | <i>Zwint</i>                 |
| NM_172990                   |            |    | 5.14E-04 |                         | 1.59 |                    | <i>Pank4</i>                 |
| NM_007554                   |            |    | 1.48E-04 |                         | 1.58 |                    | <i>Bmp4</i>                  |
| NM_009542                   |            |    | 3.55E-04 |                         | 1.57 |                    | <i>Zfp101</i>                |
| NM_001271019//NM_145510     |            |    | 4.95E-04 |                         | 1.57 |                    | <i>Siglec5</i>               |
| NM_027270                   |            |    | 3.87E-04 |                         | 1.57 |                    | <i>Exoc1</i>                 |
| NM_001013372                |            |    | 5.68E-05 |                         | 1.57 |                    | <i>Nrp</i>                   |
| NM_175112                   |            |    | 1.77E-04 |                         | 1.56 |                    | <i>Rae1</i>                  |
| NM_016693                   |            |    | 5.12E-04 |                         | 1.54 |                    | <i>Map3k6</i>                |
| NM_001009949                |            |    | 2.11E-04 |                         | 1.52 |                    | <i>Slc25a51</i>              |
| NM_201372                   |            |    | 1.65E-05 |                         | 1.50 |                    | <i>Ccdc84</i>                |
| NM_001003898//NM_001003898  |            |    | 3.63E-04 |                         | 1.47 |                    | <i>Tarabdp</i>               |
| NM_011083                   |            |    | 2.66E-04 |                         | 1.47 |                    | <i>Pik3c2a</i>               |
|                             |            |    | 1.04E-04 |                         | 1.46 |                    | <i>9430013L17Rik</i>         |
| NM_009740                   |            |    | 1.75E-04 |                         | 1.46 |                    | <i>Bcl10</i>                 |
| NM_029949                   |            |    | 3.27E-05 |                         | 1.46 |                    | <i>Snop3</i>                 |
| NM_009517                   |            |    | 4.24E-04 |                         | 1.46 |                    | <i>Zmat3</i>                 |
| NM_001161797//NM_175301     |            |    | 1.19E-04 |                         | 1.45 |                    | <i>Phactr4</i>               |
| NM_001271797//NM_026501     |            |    | 6.52E-05 |                         | 1.44 |                    | <i>Rchy1</i>                 |
| NM_133854                   |            |    | 2.90E-05 |                         | 1.44 |                    | <i>Snapiin</i>               |
| NM_001001986//NM_0011001986 |            |    | 1.67E-04 |                         | 1.43 |                    | <i>8430427H17Rik</i>         |
| NM_178694                   |            |    | 1.14E-04 |                         | 1.42 |                    | <i>Zer1</i>                  |
| XM_003945523//XM_003945523  |            |    | 1.64E-05 |                         | 1.42 |                    | <i>3021401N23Rik</i>         |
| NR_029555                   |            |    | 4.11E-04 |                         | 1.40 |                    | <i>A430104N18Rik//Mir142</i> |
| NR_035472//NR_038073        |            |    | 3.69E-04 |                         | 1.40 |                    | <i>Mir1949//Snhg4</i>        |
| NM_172742                   |            |    | 2.33E-04 |                         | 1.39 |                    | <i>Mtmr10</i>                |
| NM_027193                   |            |    | 5.11E-05 |                         | 1.39 |                    | <i>Dph5</i>                  |
| NM_001177792//NM_001177792  |            |    | 1.73E-05 |                         | 1.38 |                    | <i>Snop23</i>                |
| NM_001111279//NM_027001     |            |    | 2.82E-05 |                         | 1.36 |                    | <i>Wdfy1</i>                 |
| NM_001080387//NM_0101080387 |            |    | 2.18E-04 |                         | 1.36 |                    | <i>Srsf10</i>                |
| NM_011157                   |            |    | 3.15E-04 |                         | 1.36 |                    | <i>Srgn</i>                  |
| NM_027861                   |            |    | 8.87E-05 |                         | 1.36 |                    | <i>Brox</i>                  |
| NM_001276292//NM_177301     |            |    | 1.05E-04 |                         | 1.36 |                    | <i>Wwp1</i>                  |
| NM_001037723//NM_001037723  |            |    | 3.15E-04 |                         | 1.35 |                    | <i>Adcy7</i>                 |
| NM_145612                   |            |    | 4.78E-04 |                         | 1.35 |                    | <i>Zfp810</i>                |
| NM_144866                   |            |    | 9.07E-05 |                         | 1.33 |                    | <i>Etf1</i>                  |
| NM_212450                   |            |    | 3.63E-04 |                         | 1.32 |                    | <i>Ctdsp2</i>                |
| NM_001159595//NM_178101     |            |    | 3.74E-04 |                         | 1.32 |                    | <i>Ints8</i>                 |
| NM_018829                   |            |    | 1.28E-04 |                         | 1.32 |                    | <i>Ap3m1</i>                 |
| NM_011669                   |            |    | 3.28E-05 |                         | 1.32 |                    | <i>Usp12</i>                 |
| NM_177992                   |            |    | 4.84E-04 |                         | 1.31 |                    | <i>Gmpr2</i>                 |
| NM_025356                   |            |    | 4.43E-04 |                         | 1.31 |                    | <i>Ube2d3</i>                |
| NM_001172073//NM_028201     |            |    | 3.62E-04 |                         | 1.31 |                    | <i>Ttc4</i>                  |
| NM_027276                   |            |    | 2.69E-04 |                         | 1.30 |                    | <i>Cdc16</i>                 |
| NM_153423                   |            |    | 2.73E-04 |                         | 1.30 |                    | <i>Wasf2</i>                 |
| NM_001161456//NM_001161456  |            |    | 3.69E-04 |                         | 1.30 |                    | <i>Cbfb</i>                  |
| NM_026040//XM_00394600      |            |    | 2.41E-04 |                         | 1.30 |                    | <i>Srfbp1</i>                |
| NM_001002846//NM_013901     |            |    | 3.53E-04 |                         | 1.29 |                    | <i>Fbxl12</i>                |
| NM_133887                   |            |    | 2.81E-04 |                         | 1.29 |                    | <i>Stx12</i>                 |
| NM_001033441                |            |    | 3.50E-04 |                         | 1.29 |                    | <i>Alg10b</i>                |
| NM_019570                   |            |    | 3.33E-04 |                         | 1.29 |                    | <i>Rev1</i>                  |
| NM_001159908//NM_133301     |            |    | 4.93E-04 |                         | 1.28 |                    | <i>Zfand2a</i>               |
| NM_001164580                |            |    | 2.23E-04 |                         | 1.28 |                    | <i>BC030336</i>              |
| NM_026662                   |            |    | 2.75E-04 |                         | 1.28 |                    | <i>Prps2</i>                 |
| NM_009047                   |            |    | 9.27E-05 |                         | 1.28 |                    | <i>Rem1</i>                  |
| NM_009976                   |            |    | 1.82E-04 |                         | 1.28 |                    | <i>Cst3</i>                  |
| NM_001081119//NM_026801     |            |    | 3.83E-04 |                         | 1.28 |                    | <i>Abhd13</i>                |
| NM_001159518//NM_008001     |            |    | 1.61E-04 |                         | 1.28 |                    | <i>Igfbp7</i>                |
| NM_009543                   |            |    | 1.48E-04 |                         | 1.27 |                    | <i>Rnf103</i>                |
| NM_001163354//NM_001163354  |            |    | 1.56E-04 |                         | 1.27 |                    | <i>Rhot1</i>                 |
| NM_009628                   |            |    | 4.68E-04 |                         | 1.27 |                    | <i>Adnp</i>                  |
| NM_028151                   |            |    | 2.42E-04 |                         | 1.27 |                    | <i>Skiv2l2</i>               |
| NM_028731                   |            |    | 4.66E-04 |                         | 1.27 |                    | <i>Eys2</i>                  |
| NM_020050                   |            |    | 3.78E-05 |                         | 1.27 |                    | <i>Tmem9b</i>                |
| NM_027946                   |            |    | 9.62E-05 |                         | 1.26 |                    | <i>Dcaf7</i>                 |
| NM_009632                   |            |    | 2.28E-04 |                         | 1.25 |                    | <i>Parp2</i>                 |
| NM_001077507//NM_001077507  |            |    | 1.30E-05 |                         | 1.25 |                    | <i>Gnas</i>                  |
| NM_175465                   |            |    | 1.37E-05 |                         | 1.24 |                    | <i>Sestd1</i>                |
| NM_175552                   |            |    | 2.75E-05 |                         | 1.24 |                    | <i>Wdr3</i>                  |
| NM_145416                   |            |    | 4.09E-04 |                         | 1.24 |                    | <i>Kri1</i>                  |
| NM_026217                   |            |    | 4.71E-04 |                         | 1.23 |                    | <i>Atg12</i>                 |
| NM_001145779//NM_008401     |            |    | 3.95E-04 |                         | 1.23 |                    | <i>Kif2a</i>                 |
| NM_022331                   |            |    | 3.19E-04 |                         | 1.23 |                    | <i>Herpud1</i>               |
| NM_001199004//NM_013701     |            |    | 1.87E-04 |                         | 1.23 |                    | <i>Golga5</i>                |
| NM_029491//NM_177038        |            |    | 5.66E-05 |                         | 1.22 |                    | <i>Trappc8</i>               |



| RefSeq Transcript ID   | p (Pretreatment-Exposure) | FC - O2:PBS vs O2:SFN | Gene Symbol                      | Gene Title                                                                                            |
|------------------------|---------------------------|-----------------------|----------------------------------|-------------------------------------------------------------------------------------------------------|
| NM_009840              |                           | 4.31E-04              | 1.21 <i>Cct8</i>                 | chaperonin containing Tcp1, subunit 8 (theta)                                                         |
| NM_030016              |                           | 1.61E-05              | 1.21 <i>Trmt13</i>               | tRNA methyltransferase 13                                                                             |
| NM_001177806//NM_0137: |                           | 1.50E-04              | 1.21 <i>Ejzka4</i>               | eukaryotic translation initiation factor 2 alpha kinase 4                                             |
| NM_021512              |                           | 1.73E-04              | 1.21 <i>Nup160</i>               | nucleoporin 160                                                                                       |
| NM_025283              |                           | 2.46E-04              | 1.20 <i>Mob4</i>                 | MOB family member 4, phocein                                                                          |
| NM_153198//NM_177993   |                           | 1.75E-04              | 1.20 <i>Hbp1</i>                 | high mobility group box transcription factor 1                                                        |
| NM_023740              |                           | 4.01E-05              | 1.20 <i>Zdhhc16</i>              | zinc finger, DHHC domain containing 16                                                                |
| NM_177390              |                           | 3.08E-04              | 1.19 <i>Myo1d</i>                | myosin ID                                                                                             |
| NM_007636              |                           | 3.72E-04              | 1.19 <i>Cct2</i>                 | chaperonin containing Tcp1, subunit 2 (beta)                                                          |
| NM_001099319//NM_1774: |                           | 3.91E-04              | 1.19 <i>Gm12942//Zmym6</i>       | predicted gene 12942//zinc finger, MYM-type 6                                                         |
| NM_144802              |                           | 3.23E-04              | 1.18 <i>Hnrpl</i>                | heterogeneous nuclear ribonucleoprotein L-like                                                        |
| NM_145943              |                           | 3.05E-04              | 1.18 <i>Sde2</i>                 | SDE2 telomere maintenance homolog (S. pombe)                                                          |
| NM_009076//XM_0039456: |                           | 4.46E-04              | 1.18 <i>LOC101055925//LOC63:</i> | 60S ribosomal protein L12-like//ribosomal protein L12                                                 |
| NM_001097644           |                           | 3.12E-04              | 1.18 <i>Cnly1</i>                | cyclin Y-like 1                                                                                       |
| NM_212484              |                           | 5.07E-04              | 1.18 <i>Cnot6</i>                | CCR4-NOT transcription complex, subunit 6                                                             |
| NM_172839              |                           | 1.97E-04              | 1.18 <i>Cnjl</i>                 | cyclin J                                                                                              |
| NM_029645              |                           | 5.69E-05              | 1.18 <i>Gatc</i>                 | glutamyl-tRNA(Gln) amidotransferase, subunit C homolog (bacterial)                                    |
| NM_198631              |                           | 2.70E-04              | 1.17 <i>Zc3h4</i>                | zinc finger CCHC-type containing 4                                                                    |
| NM_001024622           |                           | 2.77E-04              | 1.17 <i>Pcnp</i>                 | PEST proteolytic signal containing nuclear protein                                                    |
| NM_001081430           |                           | 1.85E-04              | 1.17 <i>Naa30</i>                | N(alpha)-acetyltransferase 30, NatC catalytic subunit                                                 |
| NM_027000              |                           | 3.49E-04              | 1.17 <i>Gtbbp4</i>               | GTP binding protein 4                                                                                 |
| NM_009076//XM_0039456: |                           | 4.52E-04              | 1.17 <i>LOC101055925//LOC63:</i> | 60S ribosomal protein L12-like//ribosomal protein L12                                                 |
| NM_053263//NM_146130// |                           | 1.95E-04              | 1.17 <i>Hnrnpa3//Gm6793</i>      | heterogeneous nuclear ribonucleoprotein A3//heterogeneous nuclear ribonucleoprotein A3 pseudogene     |
| NM_001168281//NM_1337: |                           | 1.45E-04              | 1.16 <i>Wwtr1</i>                | WW domain containing transcription regulator 1                                                        |
| NM_001001144//NM_0011: |                           | 4.39E-04              | 1.16 <i>Scap</i>                 | SREBF chaperone                                                                                       |
| NM_172601              |                           | 3.58E-04              | 1.16 <i>Rab2b</i>                | RAB2B, member RAS oncogene family                                                                     |
| NM_001080706           |                           | 1.28E-04              | 1.16 <i>Rta1</i>                 | BTA1 RNA polymerase II, B-TFIID transcription factor-associated, (Mot1 homolog, S. cerevisiae)        |
| NM_001205367//NM_0098: |                           | 1.06E-04              | 1.16 <i>Sep7</i>                 | septin 7                                                                                              |
| NM_024213              |                           | 4.58E-04              | 1.16 <i>Anapc4</i>               | anaphase promoting complex subunit 4                                                                  |
| NM_001159645//NM_0097: |                           | 4.88E-04              | 1.15 <i>Araf</i>                 | v-rat murine sarcoma 3611 viral oncogene homolog                                                      |
| NM_028599              |                           | 9.72E-05              | 1.15 <i>Wdr75</i>                | WD repeat domain 75                                                                                   |
| NM_001168248//NM_0289: |                           | 2.46E-04              | 1.14 <i>Rmi1</i>                 | RMI1, RecQ mediated genome instability 1, homolog (S. cerevisiae)                                     |
| NM_019995              |                           | 1.36E-04              | 1.13 <i>Supt20</i>               | suppressor of Ty 20                                                                                   |
| NM_00114131//NM_1460:  |                           | 3.45E-04              | 1.12 <i>Ppp4r1</i>               | protein phosphatase 4, regulatory subunit 1                                                           |
| NM_010239//NR_073181   |                           | 1.03E-04              | 1.12 <i>Fth1</i>                 | ferritin heavy chain 1                                                                                |
| NM_001001491           |                           | 1.67E-04              | 1.12 <i>Tpm4</i>                 | tropomyosin 4                                                                                         |
| NM_025975              |                           | 2.97E-04              | 1.12 <i>Dynl1t3</i>              | dynein light chain Tctex-type 3                                                                       |
| NM_178610              |                           | 4.11E-04              | 1.11 <i>Krr1</i>                 | KRR1, small subunit (SSU) processome component, homolog (yeast)                                       |
| NM_145441              |                           | 2.62E-04              | 1.10 <i>Ubx2a</i>                | UBX domain protein 2A                                                                                 |
| NM_080561//NM_207110   |                           | 3.08E-04              | 1.10 <i>Rnf216</i>               | ring finger protein 216                                                                               |
| NM_026444              |                           | 4.33E-04              | 1.09 <i>Cs</i>                   | citrate synthase                                                                                      |
| NM_001099319//NM_1774: |                           | 4.86E-04              | 1.06 <i>Gm12942//Zmym6</i>       | predicted gene 12942//zinc finger, MYM-type 6                                                         |
| NR_003292              |                           | 3.00E-04              | 1.03 <i>Zxda</i>                 | zinc finger, X-linked, duplicated A                                                                   |
| NM_028123              |                           | 4.61E-05              | 1.02 <i>Zlc37a3</i>              | solute carrier family 37 (glycerol-3-phosphate transporter), member 3                                 |
| NM_001159571//NM_0101: |                           | 3.56E-04              | -2.22 <i>Ephb4</i>               | Eph receptor B4                                                                                       |
| NM_008369              |                           | 3.27E-04              | -2.20 <i>Il3ra</i>               | interleukin 3 receptor, alpha chain                                                                   |
| NM_008512              |                           | 3.22E-05              | -1.93 <i>Lrp1</i>                | low density lipoprotein receptor-related protein 1                                                    |
| NM_001081342//NM_1777: |                           | 4.46E-04              | -1.90 <i>Gpr133</i>              | G protein-coupled receptor 133                                                                        |
| NM_026158              |                           | 4.81E-04              | -1.87 <i>Iso2b</i>               | isochorismatase domain containing 2b                                                                  |
| NM_138672              |                           | 4.13E-04              | -1.82 <i>Stab1</i>               | stabilin 1                                                                                            |
| NM_010517              |                           | 1.54E-04              | -1.80 <i>Igfbp4</i>              | insulin-like growth factor binding protein 4                                                          |
| NM_010180              |                           | 5.09E-04              | -1.77 <i>Fbln1</i>               | fibulin 1                                                                                             |
| NM_053272              |                           | 1.62E-04              | -1.74 <i>Dhcr24</i>              | 24-dehydrocholesterol reductase                                                                       |
| NM_030238              |                           | 2.18E-05              | -1.69 <i>Dync1h1</i>             | dynein cytoplasmic 1 heavy chain 1                                                                    |
| NM_001038612//NM_0010: |                           | 4.44E-04              | -1.67 <i>Olfm1</i>               | olfactomedin 1                                                                                        |
| NM_011989              |                           | 1.23E-05              | -1.63 <i>Zlc27a4</i>             | solute carrier family 27 (fatty acid transporter), member 4                                           |
| NM_001101448//NM_0011: |                           | 7.31E-05              | -1.63 <i>Mgat1</i>               | mannoside acetylglucosaminyltransferase 1                                                             |
| NM_019776              |                           | 3.45E-04              | -1.62 <i>Snd1</i>                | staphylococcal nuclease and tudor domain containing 1                                                 |
| NM_153088              |                           | 4.62E-04              | -1.62 <i>Ctdsp1</i>              | CTD (carboxy-terminal domain, RNA polymerase II, polypeptide A) small phosphatase 1                   |
| NM_139139              |                           | 3.09E-04              | -1.61 <i>Dnajc17</i>             | Dnaj (Hsp40) homolog, subfamily C, member 17                                                          |
| NM_153781              |                           | 2.57E-04              | -1.60 <i>Pygb</i>                | brain glycogen phosphorylase                                                                          |
| NM_177301              |                           | 1.29E-04              | -1.59 <i>Hnrpl</i>               | heterogeneous nuclear ribonucleoprotein L                                                             |
| NM_008551              |                           | 9.68E-05              | -1.59 <i>Mapkapk2</i>            | MAP kinase-activated protein kinase 2                                                                 |
| NM_013700              |                           | 1.40E-04              | -1.59 <i>Usp5</i>                | ubiquitin specific peptidase 5 (isopeptidase T)                                                       |
| NM_011814              |                           | 4.99E-04              | -1.56 <i>Fxr2</i>                | fragile X mental retardation, autosomal homolog 2                                                     |
| NM_010950              |                           | 2.67E-04              | -1.56 <i>Numbl</i>               | numb-like                                                                                             |
| NM_178919              |                           | 4.23E-04              | -1.56 <i>Lmf2</i>                | lipase maturation factor 2                                                                            |
| NM_133949              |                           | 4.72E-05              | -1.54 <i>Ptvl1</i>               | prostate tumor over expressed gene 1                                                                  |
| NM_001130450//NM_0011: |                           | 3.16E-04              | -1.54 <i>Nfe2l1</i>              | nuclear factor, erythroid derived 2,-like 1                                                           |
| NM_001172205//NM_0011: |                           | 3.44E-04              | -1.52 <i>Arid5a</i>              | AT rich interactive domain 5A (MRF1-like)                                                             |
| NM_001271402//NM_0012: |                           | 1.69E-05              | -1.51 <i>Ephx2</i>               | epoxide hydrolase 2, cytoplasmic                                                                      |
| NM_080728//NM_0011641: |                           | 1.95E-04              | -1.49 <i>Myh7//Myh6</i>          | myosin, heavy polypeptide 7, cardiac muscle, beta//myosin, heavy polypeptide 6, cardiac muscle, alpha |
| NM_001127363//NM_1831: |                           | 1.18E-04              | -1.47 <i>Ipp5a</i>               | inositol polyphosphate-5-phosphatase A                                                                |
| NM_001001565//NM_0010: |                           | 7.34E-05              | -1.45 <i>Chpf</i>                | chondroitin polymerizing factor                                                                       |
| NM_031874              |                           | 2.21E-04              | -1.45 <i>Rab3d</i>               | RAB3D, member RAS oncogene family                                                                     |
| NM_019649              |                           | 1.45E-06              | -1.44 <i>Clptm1</i>              | cleft lip and palate associated transmembrane protein 1                                               |
| NM_001024458//NM_0011: |                           | 1.53E-04              | -1.44 <i>Add1</i>                | adducin 1 (alpha)                                                                                     |
| NM_001252282//NM_0012: |                           | 4.10E-04              | -1.43 <i>Ogdh</i>                | oxoglutarate (alpha-ketoglutarate) dehydrogenase (lipoamide)                                          |
| NM_011349              |                           | 2.56E-04              | -1.42 <i>Sema3f</i>              | sema domain, immunoglobulin domain (Ig), short basic domain, secreted, (semaphorin) 3F                |
| NM_027402              |                           | 5.17E-04              | -1.42 <i>Fndc5</i>               | fibronectin type III domain containing 5                                                              |
| NM_145396              |                           | 4.06E-04              | -1.41 <i>Tbl3</i>                | transducin (beta)-like 3                                                                              |
| NM_001146318//NM_0099: |                           | 5.25E-04              | -1.40 <i>Cnp</i>                 | 2',3'-cyclic nucleotide 3' phosphodiesterase                                                          |
| NM_001162998           |                           | 2.49E-04              | -1.40 <i>Ssm16</i>               | small integral membrane protein 6                                                                     |
| NM_001159328//NM_0082: |                           | 2.83E-04              | -1.39 <i>Hgs</i>                 | HGF-regulated tyrosine kinase substrate                                                               |
| NM_016860              |                           | 2.02E-05              | -1.39 <i>Actr1a</i>              | ARP1 actin-related protein 1A, contractin alpha                                                       |
| NM_001083921//NM_0197: |                           | 6.96E-05              | -1.38 <i>Rbck1</i>               | RanBP-type and C3HC4-type zinc finger containing 1                                                    |
| NM_175356              |                           | 2.47E-04              | -1.38 <i>Pi4kb</i>               | phosphatidylinositol 4-kinase, catalytic, beta polypeptide                                            |
| NM_013863              |                           | 1.68E-04              | -1.38 <i>Bag3</i>                | BCL2-associated athanogene 3                                                                          |
| NM_001136085//NM_0012: |                           | 1.49E-04              | -1.37 <i>Uba1</i>                | ubiquitin-like modifier activating enzyme 1                                                           |
| NM_001110504//NM_0076: |                           | 1.69E-05              | -1.36 <i>Capn1</i>               | calpain 1                                                                                             |
| NM_001112722//NM_0011: |                           | 1.82E-05              | -1.35 <i>Arhgef10</i>            | Rho guanine nucleotide exchange factor (GEF) 10-like                                                  |
| NM_024227              |                           | 4.93E-04              | -1.35 <i>Mrp128</i>              | mitochondrial ribosomal protein L28                                                                   |
| NM_026938              |                           | 3.32E-04              | -1.35 <i>Tmem160</i>             | transmembrane protein 160                                                                             |
| NM_001163571//NM_0307: |                           | 3.58E-04              | -1.33 <i>Senp3</i>               | SUMO/sentrin specific peptidase 3                                                                     |
| NM_022995              |                           | 3.05E-04              | -1.33 <i>Pmepa1</i>              | prostate transmembrane protein, androgen induced 1                                                    |

| RefSeq Transcript ID   | p (Pretreatment-Exposure) | FC - O2:PBS vs O2:SFN | Gene Symbol                 | Gene Title                                                                                                  |
|------------------------|---------------------------|-----------------------|-----------------------------|-------------------------------------------------------------------------------------------------------------|
| NM_024256              | 3.59E-04                  | -1.32                 | <b>B3gat3</b>               | beta-1,3-glucuronyltransferase 3 (glucuronosyltransferase I)                                                |
| NM_001122736//NM_0011: | 6.23E-05                  | -1.32                 | <b>Igf2</b>                 | insulin-like growth factor 2                                                                                |
| NM_001163452//NM_0198: | 8.19E-05                  | -1.31                 | <b>Trpc4ap</b>              | transient receptor potential cation channel, subfamily C, member 4 associated protein                       |
| NM_001177759//NM_0011: | 3.52E-04                  | -1.30                 | <b>Tnfrsf8</b>              | tumor necrosis factor, alpha-induced protein 8                                                              |
| NM_138748              | 1.73E-04                  | -1.29                 | <b>Ppp2r4</b>               | protein phosphatase 2A, regulatory subunit B (PR 53)                                                        |
| NM_001159521//NM_1387: | 2.69E-04                  | -1.28                 | <b>Plexnb2</b>              | plexin B2                                                                                                   |
| NM_001243043//NM_0012: | 1.47E-04                  | -1.26                 | <b>Ap1b1</b>                | adaptor protein complex AP-1, beta 1 subunit                                                                |
| NM_026017              | 2.16E-05                  | -1.26                 | <b>Ctdnep1</b>              | CTD nuclear envelope phosphatase 1                                                                          |
| NM_001164184//NM_0011: | 3.77E-04                  | -1.26                 | <b>Lsr</b>                  | lipolysis stimulated lipoprotein receptor                                                                   |
| NM_009439              | 4.71E-04                  | -1.26                 | <b>Psmc3</b>                | proteasome (prosome, macropain) 26S subunit, non-ATPase, 3                                                  |
| NM_001081158           | 2.93E-04                  | -1.25                 | <b>Cluh</b>                 | clustered mitochondria (cluA/CLU1) homolog                                                                  |
| NM_027088              | 2.59E-04                  | -1.24                 | <b>Bap1</b>                 | Brca1 associated protein 1                                                                                  |
| NM_025954              | 2.12E-04                  | -1.24                 | <b>Pgp</b>                  | phosphoglycolate phosphatase                                                                                |
| NM_001145970//NM_1449: | 3.46E-04                  | -1.23                 | <b>Map7d1</b>               | MAP7 domain containing 1                                                                                    |
| NM_026759              | 2.00E-04                  | -1.21                 | <b>Mrpl13</b>               | mitochondrial ribosomal protein L13                                                                         |
| NM_001253883//NM_0110: | 3.21E-04                  | -1.20                 | <b>Pkm</b>                  | pyruvate kinase, muscle                                                                                     |
| NM_181650              | 1.86E-05                  | -1.20                 | <b>Prdm4</b>                | PR domain containing 4                                                                                      |
| NM_001109995//NM_0114: | 2.80E-04                  | -1.19                 | <b>Eftud2</b>               | elongation factor Tu GTP binding domain containing 2                                                        |
| NM_133204              | 2.95E-04                  | -1.19                 | <b>Zscan5b</b>              | zinc finger and SCAN domain containing 5B                                                                   |
| NM_019443              | 2.46E-04                  | -1.19                 | <b>Ndufa1</b>               | NADH dehydrogenase (ubiquinone) 1 alpha subcomplex, 1                                                       |
| NM_024166//XM_0014726: | 2.48E-05                  | -1.18                 | <b>Chchd2//Gm13202//LC</b>  | coiled-coil-helix-coiled-coil-helix domain containing 2                                                     |
| NM_134151              | 5.41E-05                  | -1.18                 | <b>Yars</b>                 | tyrosyl-tRNA synthetase                                                                                     |
| NM_001037722//NM_0096: | 3.84E-04                  | -1.18                 | <b>Adam15</b>               | a disintegrin and metallopeptidase domain 15 (metargidin)                                                   |
| NM_172793              | 8.31E-05                  | -1.17                 | <b>Btn19</b>                | butyrophilin-like 9                                                                                         |
| NM_021383              | 5.23E-04                  | -1.16                 | <b>Racd1</b>                | rcd1 (required for cell differentiation) homolog 1 (S. pombe)                                               |
| NM_001146196//NM_0091: | 8.52E-05                  | -1.16                 | <b>Scin</b>                 | scinderin                                                                                                   |
| NM_007533              | 9.84E-05                  | -1.13                 | <b>Bckdha</b>               | branched chain ketoacid dehydrogenase E1, alpha polypeptide                                                 |
| NM_024220//XM_910031// | 3.29E-04                  | -1.13                 | <b>LOC635087//LOC675851</b> | NADH dehydrogenase [ubiquinone] 1 subunit C2-like//NADH dehydrogenase (ubiquinone) 1, subcomplex unknown, 2 |
| NM_011292//XM_0039455: | 4.95E-04                  | -1.13                 | <b>Gms451//LOC10105602</b>  | predicted gene 5451//60S ribosomal protein L9-like//ribosomal protein L9                                    |
| NM_009642              | 2.72E-05                  | -1.13                 | <b>Agtrap</b>               | angiotensin II, type I receptor-associated protein                                                          |
| NM_009304              | 1.28E-05                  | -1.12                 | <b>Syngn2</b>               | synaptogyrin 2                                                                                              |
| NM_010163              | 2.08E-04                  | -1.10                 | <b>Ext2</b>                 | exostoses (multiple) 2                                                                                      |
| NM_175102              | 4.82E-04                  | -1.10                 | <b>Sf3b5</b>                | splicing factor 3b, subunit 5                                                                               |
|                        | 9.71E-07                  | -1.09                 | <b>AA511254</b>             | expressed sequence AA511254                                                                                 |
| NM_001122739//NM_0105: | 2.69E-04                  | -1.08                 | <b>Inpp1</b>                | inositol polyphosphate phosphatase-like 1                                                                   |
| NM_145383              | 2.92E-04                  | -1.08                 | <b>Rho</b>                  | rhodopsin                                                                                                   |
| NM_024437//NM_024446   | 6.13E-05                  | -1.05                 | <b>Nudt7</b>                | nudix (nucleoside diphosphate linked moiety X)-type motif 7                                                 |



**Table E8. Selected genes and pathway analysis of Nrf2-dependent lung transcriptome changes by sulforaphane during hyperoxia exposure (n = 1,007,  $P < 0.01$  2-Way ANOVA).**

**A. Selected gene list**

| Functional Category                          | RefSeq ID    | $p^{\dagger}$ | FD <sup>‡</sup> | Gene Symbol     | Gene Title                                                                    |
|----------------------------------------------|--------------|---------------|-----------------|-----------------|-------------------------------------------------------------------------------|
| Mitochondrial Function and Energy Metabolism | NM_016966    | 0.00823       | 5.37            | <i>Phgdh</i>    | 3-phosphoglycerate dehydrogenase pseudogene                                   |
|                                              | NM_028765    | 0.00232       | 2.99            | <i>Acox1</i>    | acyl-Coenzyme A oxidase-like                                                  |
|                                              | NM_008512    | 0.00159       | 2.47            | <i>Lrp1</i>     | low density lipoprotein receptor-related protein 1                            |
|                                              | NM_173371    | 8.27E-04      | 1.50            | <i>H6pd</i>     | hexose-6-phosphate dehydrogenase (glucose 1-dehydrogenase)                    |
|                                              | NM_010324    | 2.90E-04      | -5.86           | <i>Got1</i>     | glutamate oxaloacetate transaminase 1, soluble                                |
|                                              | NM_009731    | 0.00321       | -3.79           | <i>Akr1b7</i>   | aldo-keto reductase family 1, member B7                                       |
|                                              | NM_011399    | 0.00875       | -2.31           | <i>Slc25a17</i> | solute carrier family 25 (mitochondrial carrier, peroxisomal membrane)        |
|                                              | NM_173011    | 0.00727       | -2.30           | <i>Iah2</i>     | isocitrate dehydrogenase 2 (NADP+), mitochondrial                             |
|                                              | NM_001009949 | 0.00110       | -2.05           | <i>Mcart1</i>   | mitochondrial carrier triple repeat 1                                         |
|                                              | NM_025835    | 4.40E-05      | -2.01           | <i>Pccb</i>     | propionyl Coenzyme A carboxylase, beta polypeptide                            |
|                                              | NM_025485    | 0.00558       | -1.82           | <i>Mrps22</i>   | mitochondrial ribosomal protein S22                                           |
|                                              | NM_029673    | 4.35E-04      | -1.79           | <i>Immt</i>     | inner membrane protein, mitochondrial                                         |
|                                              | NM_001135112 | 0.00418       | -1.67           | <i>Dnaja3</i>   | DnaJ (Hsp40) homolog, subfamily A, member 3                                   |
|                                              | NM_016774    | 0.00356       | -1.66           | <i>Atp5b</i>    | ATP synthase, H+ transporting mitochondrial F1 complex, beta subunit          |
| Antioxidant and Defense                      | NM_021456    | 0.00702       | -7.42           | <i>Ces1g</i>    | carboxylesterase 1G                                                           |
|                                              | NM_016903    | 2.02E-04      | -5.44           | <i>Esd</i>      | esterase D/formylglutathione hydrolase                                        |
|                                              | NM_010363    | 0.00360       | -4.68           | <i>Gstz1</i>    | glutathione transferase zeta 1 (maleylacetoacetate isomerase)                 |
|                                              | NM_183165    | 5.27-E04      | -1.98           | <i>Pyroxd1</i>  | pyridine nucleotide-disulphide oxidoreductase domain 1                        |
|                                              | NM_008049    | 0.00930       | -1.78           | <i>Ftl</i>      | ferritin light chain 1                                                        |
| Immunity, Injury, and Development            | NM_001110146 | 0.00713       | 5.76            | <i>Prg4</i>     | proteoglycan 4 (megakaryocyte stimulating factor, articular superficial zone) |
|                                              | NM_001123382 | 0.00142       | 2.96            | <i>Il1r1</i>    | interleukin 1 receptor, type 1                                                |
|                                              | NM_013605    | 0.00659       | 2.74            | <i>Muc1</i>     | mucin 1, transmembrane                                                        |
|                                              | NM_001038612 | 9.41E-07      | 2.58            | <i>Olfm1</i>    | olfactomedin 1                                                                |
|                                              | NM_008608    | 0.00607       | 2.48            | <i>Mmp14</i>    | matrix metalloproteinase 14 (membrane-inserted)                               |
|                                              | NM_001079908 | 0.00701       | 2.37            | <i>Fgfr1</i>    | fibroblast growth factor receptor 1                                           |
|                                              | NM_001146268 | 0.00946       | 2.26            | <i>Pdgfrb</i>   | platelet derived growth factor receptor, beta polypeptide                     |
|                                              | NM_033574    | 0.00910       | 1.62            | <i>Pcdhga1</i>  | protocadherin gamma subfamily A, 1                                            |
|                                              | NM_001163522 | 0.00563       | -4.49           | <i>Emcn</i>     | endomucin                                                                     |
|                                              | NM_010393    | 7.58E-04      | -2.91           | <i>H2-Q5</i>    | histocompatibility 2, Q region locus 5                                        |
| Other Cellular Process and Signaling         | NM_008209    | 3.90-E04      | -2.79           | <i>Mrl1</i>     | major histocompatibility complex, class I-related                             |
|                                              | NM_011957    | 0.00884       | 3.76            | <i>Creb3l1</i>  | cAMP responsive element binding protein 3-like 1                              |
|                                              | NM_001098799 | 0.00634       | 3.07            | <i>Tox2</i>     | TOX high mobility group box family member 2                                   |
|                                              | NM_020047    | 0.00592       | -7.13           | <i>Tacstd2</i>  | tumor-associated calcium signal transducer 2                                  |
|                                              | NM_008949    | 9.66E-05      | -3.83           | <i>Psmc3ip</i>  | proteasome 26S subunit, ATPase 3, interacting protein                         |
|                                              | NM_133977    | 0.00685       | -2.85           | <i>Trf</i>      | transferrin                                                                   |
|                                              | NM_011068    | 0.00497       | -2.11           | <i>Pex11a</i>   | peroxisomal biogenesis factor 11 alpha                                        |
|                                              | NM_181410    | 4.64-E04      | -1.79           | <i>Gtf2h3</i>   | general transcription factor IIH, polypeptide 3                               |

<sup>†</sup>Two-way ANOVA (Genotype, pretreatment) of hyperoxia-exposed mice. <sup>‡</sup>Fold difference in SFN-treated/O<sub>2</sub>-exposed *Nrf2*<sup>-/-</sup> mice vs SFN-treated/O<sub>2</sub>-exposed *Nrf2*<sup>+/+</sup> mice (positive values indicate higher expression in *Nrf2*<sup>-/-</sup>, negative values lower expression in *Nrf2*<sup>-/-</sup>).

## B. Top networks

|   | <b>Genes (SFN-altered in bold)</b>                                                                                                                                                                                             | <b>Score</b> | <b>Disease and Functions</b>                                                             |
|---|--------------------------------------------------------------------------------------------------------------------------------------------------------------------------------------------------------------------------------|--------------|------------------------------------------------------------------------------------------|
| 1 | <i>Atg2a, Bre, Chd8, Commd5, Commd7, Ddost, Dnttip1, Faf1, Fam175a, Fucal, Got1, Got2, Ilkap, Itpkb, Kpna1, Kpna3, Nkiras1, Nsf1c, Nxt1, Pak1ip1, Pdlim1, Pnpt1, Sar1a, Slbp, Snip1, Tmem120a, Trim13, Ttc28, Uba3, Zfand6</i> | 45           | Amino Acid Metabolism, Small Molecule Biochemistry, Auditory Disease                     |
| 2 | <i>Aasdhppt, Atg13, Atp2a3, Bzw1, Cct3, Ddx18, Dlgap4, Eif2ak1, Eif2b2, Gabarapl2, Gfm1, Gstz1, Hccs, Hmcn1, Kcnq5, Mlx, Nck1, Nit1, Nova2, Pcbp2, Rnf103, Rrp36, Shmt1, Sumo3, Tardbp, Tbc1d2b, Thyn1, Tmpo, Trmt5, Wdr43</i> | 43           | Dermatological Diseases and Conditions, Developmental Disorder, Hereditary Disorder      |
| 3 | <i>Acp6, Adipor1, Aig1, Arpc5, Asb8, Camk2g, Cdk18, Diaph1, Ilk, Jdp2, Kctd5, Larpl, Mapkapk2, Mtch2, Nckap1, Nfib, Nfx1, Parvb, Rasgrp2, Rchyl, Rhob, Rusc1, Saa3, Sertad1, Smpd2, Tns1, Vars, Wdr74, Znf746</i>              | 42           | Cell Morphology, Cellular Assembly and Organization, Cellular Function and Maintenance   |
| 4 | <i>Afg3l2, Arl16, Atp5a1, Cbfa2t3, Dctd, Hip1, Hmg20b, Homer2, Itp2, Lrp12, Mark3, Mprp, Nif3l1, Nol11, Pcgf5, Pde12, Pde6d, Phc2, Phf21a, Rab8a, Rhbdf2, Rnf146, Snapin, Ssx2ip, Stx7, Tbc1d10a, Tsc22d4, Vamp2, Zbtb4</i>    | 42           | Cellular Assembly and Organization, Cellular Function and Maintenance, Cellular Movement |
| 5 | <i>Arfgap1, Arid5a, Dmap1, Emg1, Gcn1l1, Gtf2a1, Gtf2f1, Gtf2h3, H6pd, Med4, Med7, Med10, Med24, Med27, Pex12, Pex19, Pex11a, Polr2d, Rad1, Rela, Rfc3, Rfwd3, Rpa2, Slc25a17, Snapc4, Supt6h, Taf12, Tmem9b, Ubac2</i>        | 42           | Cellular Assembly and Organization, Cellular Function and Maintenance, Gene Expression   |

## C. Top canonical pathways and toxicity lists

| <b>Pathway</b>                                                                                       | <b>-Log(p)</b> | <b>Genes</b>                                                                                                               |
|------------------------------------------------------------------------------------------------------|----------------|----------------------------------------------------------------------------------------------------------------------------|
| Oxidative Phosphorylation/Mitochondrial Dysfunction                                                  | 2.54-1.78      | <i>Sdhb, Cox11, Uqcrc1, Ndufa8, Ndufs3, Atp5a1, Cox8a, Uqcrfs1, Pdha1, Atp5b, Casp8, Ndufs1</i>                            |
| Glutamate Degradation II/ Aspartate Biosynthesis/ L-cysteine Degradation I/ Aspartate Degradation II | 2.3-2.01       | <i>Got2, Got1</i>                                                                                                          |
| Hypoxia-Inducible Factor Signaling                                                                   | 2.24           | <i>Cops5, Flt4, Kdr, Plcg1, Mdm2, Elavl1, Eif2b2, Hsp90aa1</i>                                                             |
| TCA Cycle II (Eukaryotic)                                                                            | 2.0            | <i>Idh3a, Sdhb, Idh3b, Suclg1</i>                                                                                          |
| NF-κB Signaling                                                                                      | 1.8            | <i>Map2k7, Fgfr1, Pdgrb, Flt4, Kdr, Ube2v1, Traf3, Rela, Pik3cd, Il1r1, Bcl10, Bmp4, Casp8</i>                             |
| RAN Signaling                                                                                        | 1.74           | <i>Kpna1, Kpna3, Ranbp1</i>                                                                                                |
| Huntington's Disease Signaling                                                                       | 1.73           | <i>Map2k7, Dnajb1, Map3k10, Hspa14, Sdhb, Dnm1l, Pdpk1, Pik3cd, Polr2d, Hip1, Casp2, Atp5b, Capn7, Casp8, Casp7, Gna15</i> |
| PPARγ/RXR activation                                                                                 | 1.7            | <i>Map2k7, Acadl, Got2, Adipor1, Med24, Rela, Il1r1, Nr2f1, Adipor2, Rxra, Plcg1, Hsp90aa1, Gna15</i>                      |
| PI3K/AKT Signaling                                                                                   | 1.61           | <i>Ppp2r5b, Pdpk1, Pik3cd, Inpp5d, Ppp2cb, Mdm2, Eif4e, Ilk, Hsp90aa1, Rela</i>                                            |
| Superpathway of Serine and Glycine Biosynthesis I                                                    | 1.5            | <i>Ubac2, Shmt1</i>                                                                                                        |
| Biogenesis of Mitochondria                                                                           | 1.32           | <i>Dnaja3, Pted2, Cxadr</i>                                                                                                |
| Pro-Apoptosis                                                                                        | 1.15           | <i>Traf3, Casp2, Casp8, Casp7</i>                                                                                          |
| Mechanism of Gene Regulation by Peroxisome Proliferators via PPARγ                                   | 1.04           | <i>Pdgrb, Il1r1, Hsd17b4, Nr2f1, Rxra, Hsp90aa1, Rela</i>                                                                  |
